# Supplementary material for: Nickel-catalyzed asymmetric reductive arylcyanation of alkenes with acetonitrile as the cyano source
Source: Royal Society of Chemistry journal article supplement (doi:10.1039/d2qo01727j), 2022-12-15
Supplement: d2qo01727j1.pdf [file d2qo01727j1.pdf]

## Nickel-Catalyzed Asymmetric Reductive Arylcyanation of Alkenes with Acetonitrile as the Cyano Source

Zhenbang Chen, and Zengming Shen\*

Shanghai Key Laboratory for Molecular Engineering of Chiral Drugs, School of  
Chemistry and Chemical Engineering, Shanghai Jiao Tong University, 800 Dongchuan  
Road, Shanghai 200240, China.

shenzengming@sjtu.edu.cn

### Table of Contents

|                                                                                        |      |
|----------------------------------------------------------------------------------------|------|
| 1、 General information.....                                                            | S2   |
| 2、 Optimization of the racemic reaction conditions.....                                | S3   |
| 3、 Synthesis and characterization data of aryl triflates <b>1</b> .....                | S5   |
| 4、 General procedure for the synthesis of chiral 3-cyanomethyl oxindoles .....         | S15  |
| 5、 Characterization data and spectra copies of products.....                           | S16  |
| 6、 Experimental Procedures and Characterization Data for Derivatization Studies .....  | S49  |
| 7、 References .....                                                                    | S61  |
| 8、 The copies of <sup>1</sup> H, <sup>13</sup> C and <sup>19</sup> F NMR spectra ..... | S62  |
| 9、 The GC-MS data.....                                                                 | S120 |
| 10、 X-Ray crystallographic data .....                                                  | S121 |

## 1、 General information

All reactions were set up with glovebox and carried out using Schlenk tubes. Anhydrous  $\text{CH}_3\text{CN}$  were purchased from damas-beta (99.9%, with molecular sieves, water  $\leq 50$  ppm) and used as received. Commercially available chemicals were obtained from Adamas, Acros Organics, Aldrich Chemical Co., Alfa Aesar and TCI, Energy Chemical and used as received unless otherwise stated.  $\text{Zn}(\text{OTf})_2$  was dried before use according to the standard methods. Zinc powder was activated with 1 M HCl aqueous solution, filtered and washed thoroughly with water, acetone and diethyl ether and dried under vacuum for 4 h.<sup>[1]</sup>

Analytical thin layer chromatography (TLC) was performed on percolated silica gel 60 F254 plates. Visualization on TLC was achieved with UV light (254 nm) and potassium permanganate as visualization methods.  $^1\text{H}$  NMR spectra were recorded on Bruker-400 (400 MHz). Chemical shifts were quoted in parts per million (ppm) referenced to the appropriate solvent peak or 0.0 ppm for tetramethylsilane. Data for  $^1\text{H}$  NMR spectra are reported as follows: chemical shift ( $\delta$  shift), multiplicity (s = singlet, d = doublet, t = triplet, q = quartet, m = multiplet, dd = double of doublet, ddd = double of dd, dt = double of triplet, td = triple of doublet), integration, coupling constant (Hz), and assignment.  $^{13}\text{C}$  NMR spectra were also recorded on Bruker-400 (100 MHz). Chemical shifts were reported in ppm referenced to the center line of a triplet at 77.16 ppm of chloroform-d. High resolution mass spectra were obtained with ACQUITY™ UPLC & Q-TOF MS Premier Spectrometer. Gas chromatograph-mass spectra analysis was performed on LECO Pegasus 4D GC×GC-TOFMS.

## 2、 Optimization of the racemic reaction conditions:

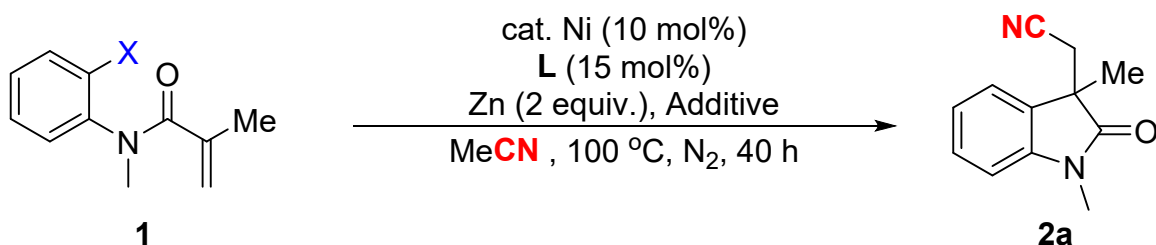

| Entry | X  | Catalyst             | Ligand           | Additive                        | <i>c</i> (1, y M) | Yield of <b>2a</b> |
|-------|----|----------------------|------------------|---------------------------------|-------------------|--------------------|
| 1     | Cl | Ni(OTf) <sub>2</sub> | dppp             | ZnCl <sub>2</sub> (30 mol%)     | 0.3               | Trace              |
| 2     | Cl | Ni(OTf) <sub>2</sub> | dppp             | Zn(OTf) <sub>2</sub> (30 mol%)  | 0.3               | 58 %               |
| 3     | Cl | Ni(OTf) <sub>2</sub> | dppp             | Zn(OAc) <sub>2</sub> (30 mol%)  | 0.3               | Trace              |
| 4     | Cl | Ni(OTf) <sub>2</sub> | dppp             | Zn(acac) <sub>2</sub> (30 mol%) | 0.3               | Trace              |
| 5     | Cl | Ni(OTf) <sub>2</sub> | dppp             | CoPC (10 mol%)                  | 0.3               | 27 %               |
| 6     | Cl | Ni(OTf) <sub>2</sub> | dppb             | Zn(OTf) <sub>2</sub> (30 mol%)  | 0.3               | Trace              |
| 7     | Cl | Ni(OTf) <sub>2</sub> | dppf             | Zn(OTf) <sub>2</sub> (30 mol%)  | 0.3               | Trace              |
| 8     | Cl | Ni(OTf) <sub>2</sub> | PPh <sub>3</sub> | Zn(OTf) <sub>2</sub> (30 mol%)  | 0.3               | Trace              |
| 9     | Cl | Ni(OTf) <sub>2</sub> | XantPhos         | Zn(OTf) <sub>2</sub> (30 mol%)  | 0.3               | NP                 |
| 10    | Cl | Ni(OTf) <sub>2</sub> | S-Phos           | Zn(OTf) <sub>2</sub> (30 mol%)  | 0.3               | NP                 |
| 11    | Cl | Ni(OTf) <sub>2</sub> | L1               | Zn(OTf) <sub>2</sub> (30 mol%)  | 0.3               | 40%                |
| 12    | Cl | Ni(OTf) <sub>2</sub> | L2               | Zn(OTf) <sub>2</sub> (30 mol%)  | 0.3               | NP                 |
| 13    | Cl | Ni(OTf) <sub>2</sub> | L3               | Zn(OTf) <sub>2</sub> (30 mol%)  | 0.3               | NP                 |
| 14    | Cl | Ni(OTf) <sub>2</sub> | dppp             | Zn(OTf) <sub>2</sub> (50 mol%)  | 0.3               | 14 %               |
| 15    | Cl | Ni(OTf) <sub>2</sub> | dppp             | Zn(OTf) <sub>2</sub> (100 mol%) | 0.3               | Trace              |
| 16    | Cl | Ni(OTf) <sub>2</sub> | dppp             | -                               | 0.3               | 18 %               |

|    |     |                       |      |                                  |     |       |
|----|-----|-----------------------|------|----------------------------------|-----|-------|
| 17 | Cl  | NiCl <sub>2</sub>     | dppp | Zn(OTf) <sub>2</sub> (30mol%     | 0.3 | 25%   |
| 18 | Cl  | NiBr <sub>2</sub>     | dppp | Zn(OTf) <sub>2</sub> (30 mol%    | 0.3 | 27%   |
| 19 | Cl  | Ni(OAc) <sub>2</sub>  | dppp | Zn(OTf) <sub>2</sub> (30 mol%    | 0.3 | 32%   |
| 20 | Cl  | Ni(acac) <sub>2</sub> | dppp | Zn(OTf) <sub>2</sub> (30 mol%    | 0.3 | 38%   |
| 21 | Cl  | Ni(cod) <sub>2</sub>  | dppp | Zn(OTf) <sub>2</sub> (30 mol%    | 0.3 | < 10% |
| 22 | Br  | Ni(OTf) <sub>2</sub>  | dppp | Zn(OTf) <sub>2</sub> (30 mol% )  | 0.3 | 45 %  |
| 23 | OTf | Ni(OTf) <sub>2</sub>  | dppp | Zn(OTf) <sub>2</sub> (30 mol% )  | 0.3 | 56 %  |
| 23 | OTf | Ni(OTf) <sub>2</sub>  | dppp | Zn(OTf) <sub>2</sub> (50 mol% )  | 0.3 | 59 %  |
| 25 | OTf | Ni(OTf) <sub>2</sub>  | dppp | Zn(OTf) <sub>2</sub> (100 mol% ) | 0.3 | 64 %  |
| 26 | OTf | Ni(OTf) <sub>2</sub>  | dppp | Zn(OTf) <sub>2</sub> (150 mol% ) | 0.3 | 46 %  |
| 27 | OTf | Ni(OTf) <sub>2</sub>  | dppp | Zn(OTf) <sub>2</sub> (200 mol% ) | 0.3 | 50 %  |
| 28 | OTf | Ni(OTf) <sub>2</sub>  | dppp | Zn(OTf) <sub>2</sub> (100 mol% ) | 0.2 | 73%   |
| 29 | OTf | Ni(OTf) <sub>2</sub>  | dppp | Zn(OTf) <sub>2</sub> (100 mol% ) | 0.1 | 85 %  |

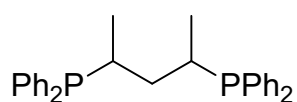

L1

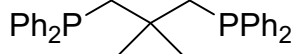

L2

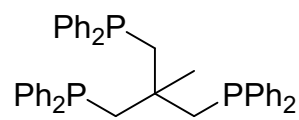

L3

### 3、 Synthesis and characterization data of aryl triflates 1

#### General procedure for the synthesis of aryl triflates 1:<sup>[2]</sup>

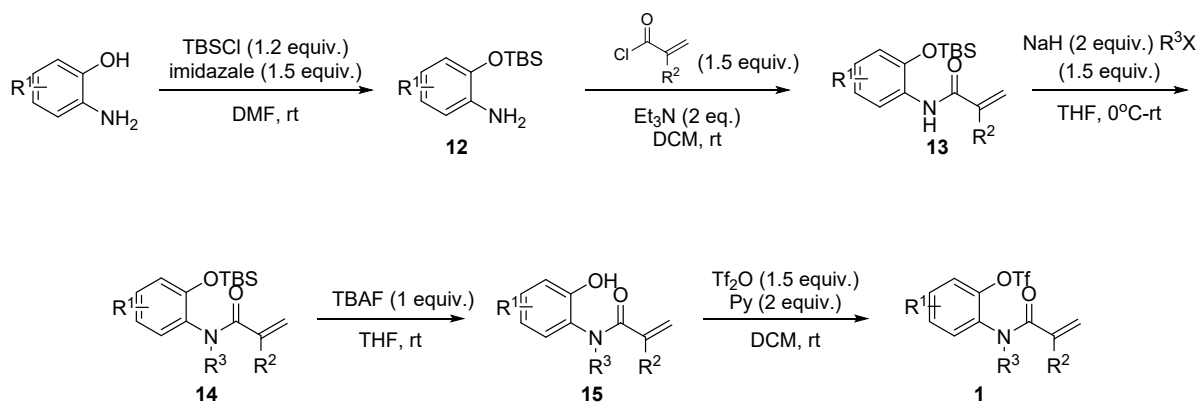

To a solution of 2-aminophenol derivative (1 equiv) and imidazole (1.5 equiv) in DMF (30 mL) was added a solution of TBSCl (1.2 equiv), the mixture was stirred at room temperature. After the reaction was completed (monitored by TLC), the mixture was quenched with saturated NH<sub>4</sub>Cl solution (50 mL) and extracted with EtOAc (50 mL  $\times$  3). The combined organic layers were washed with brine (100 mL), dried over anhydrous Na<sub>2</sub>SO<sub>4</sub> and filtrated. The solvent was evaporated in vacuo and the remaining residue was purified by column chromatography on silica gel (petroleum ether/EtOAc) to yield products **12** as red oil.

To a solution of **12** and triethylamine (2 equiv) in DCM (50 mL) at 0 °C was added dropwise acryloyl chloride under N<sub>2</sub> atmosphere. The mixture was warmed to room temperature and stirred until the amine was consumed completely (monitored by TLC). The mixture was poured into water (50 mL) and extracted by DCM (3 × 50 mL). The combined organic layer was washed with brine (100 mL), dried over anhydrous Na<sub>2</sub>SO<sub>4</sub>, filtered, and concentrated in vacuo. The residue (red oil) **13** was used for the next step without further purification.

To a stirred mixture of amide **13** in dry THF (50 mL) was added NaH (60% dispersion in mineral oil) (2 equiv) at 0 °C under N<sub>2</sub>. After being stirred at rt for 30 min, the reaction was cooled to 0 °C and R<sup>3</sup>X (1.5 equiv) was added dropwise. The mixture was then stirred at room temperature overnight. After the reaction was finished (monitored by TLC), the mixture was quenched with saturated aqueous NH<sub>4</sub>Cl at 0 °C and extracted with EtOAc (50 mL × 3). The combined extracts were washed with water and brine, dried over Na<sub>2</sub>SO<sub>4</sub>, filtered, and concentrated in vacuo. The residue **14** was used for the next step without further purification.

To a solution of **14** in THF (50 mL) was added tetrabutylammonium fluoride (1 equiv). The mixture was stirred at rt until the TBS-protected substrate was consumed completely (monitored by TLC). The reaction was poured into water (50 mL) and extracted by EtOAc (3 × 50 mL). The combined organic layer was washed with brine (100 mL), dried over anhydrous Na<sub>2</sub>SO<sub>4</sub>, filtered, and concentrated in vacuo. The remaining residue was purified by column chromatography on silica gel (petroleum ether/EtOAc) to yield compound **15** as a yellow solid.

To a solution of phenol **15** and pyridine (2 equiv) in DCM (50 mL) at 0 °C was added dropwise Tf<sub>2</sub>O (1.5 equiv) under N<sub>2</sub> atmosphere, the mixture was warmed to room temperature and stirred for 2 h. After completion of the reaction as indicated by TLC, the mixture was poured into water (50 mL) and extracted by DCM (3 × 50 mL). The combined organic layers were dried (Na<sub>2</sub>SO<sub>4</sub>) and evaporated. The residue was purified on a silica gel column using petroleum ether/EtOAc to afford the aryl triflate **1**.

#### **Characterization data of aryl triflates 1:**

**2-(*N*-Methylmethacrylamido)phenyl trifluoromethanesulfonate (1a)**<sup>[2]</sup>

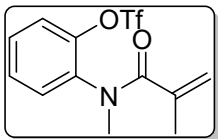

According to general procedure, **1a** was obtained in 32% yield (2.4 g, over five steps) as a white solid. Melting point: 59.5 - 62.1 °C.

**<sup>1</sup>H NMR (400 MHz, CDCl<sub>3</sub>):** δ 7.45 – 7.27 (m, 4H), 5.04 (s, 1H), 4.77 (s, 1H), 3.34 (s, 3H), 1.87 (s, 3H). **<sup>13</sup>C NMR (100 MHz, CDCl<sub>3</sub>):** δ 171.5, 144.5, 139.7, 137.8, 129.4, 129.2, 128.9, 122.6, 119.8, 118.6 (q, *J* = 320.2 Hz), 37.4, 19.9. **<sup>19</sup>F NMR (376 MHz, CDCl<sub>3</sub>):** δ -73.82 (s).

### 3-Methyl-2-(*N*-methylmethacrylamido)phenyl trifluoromethanesulfonate (**1b**)<sup>[2]</sup>

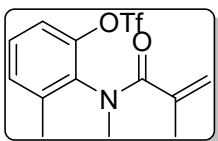

According to general procedure, **1b** was obtained in 24% yield (3.2 g, over five steps) as a brown oil. Two rotamers were observed in 3:1 ratio, NMR data of the major rotamer were reported. **<sup>1</sup>H NMR (400 MHz, CDCl<sub>3</sub>):** δ 7.30 – 7.26 (m, 2H), 7.16 (m, 1H), 4.96 (s, 1H), 4.71 (s, 1H), 3.21 (s, 3H), 2.34 (s, 3H), 1.80 (s, 3H). **<sup>13</sup>C NMR (100 MHz, CDCl<sub>3</sub>):** δ 171.6, 145.2, 139.7, 138.7, 136.5, 131.1, 128.9, 119.9, 118.5 (q, *J* = 320.0 Hz), 118.5, 36.6, 19.8 18.2. **<sup>19</sup>F NMR (376 MHz, CDCl<sub>3</sub>):** δ -73.89 (s).

### 4-Methyl-2-(*N*-methylmethacrylamido)phenyl trifluoromethanesulfonate (**1c**)<sup>[2]</sup>

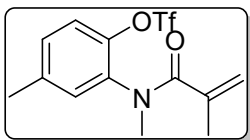

According to general procedure, **1c** was obtained in 29% yield (2.4 g, over five steps) as a yellow oil.

**<sup>1</sup>H NMR (400 MHz, CDCl<sub>3</sub>):** δ 7.19 – 7.09 (m, 3H), 5.03 (s, 1H), 4.77 (s, 1H), 3.32 (s, 3H), 2.36 (s, 3H), 1.86 (s, 3H). **<sup>13</sup>C NMR (100 MHz, CDCl<sub>3</sub>):** δ 171.2, 142.1, 139.8, 139.6, 137.2, 129.2 (d, *J* = 4.9 Hz), 121.9, 119.4, δ 118.4 (q, *J* = 320.1 Hz), 37.2, 20.7, 19.6. **<sup>19</sup>F NMR (376 MHz, CDCl<sub>3</sub>):** δ -74.07 (s).

#### 4-(*tert*-Butyl)-2-(*N*-methylmethacrylamido)phenyl trifluoromethanesulfonate (**1d**)

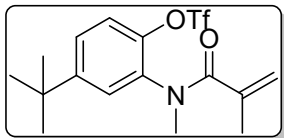

According to general procedure, **1d** was obtained in 16% yield (1.8 g, over five steps) as a yellow oil.

**<sup>1</sup>H NMR (400 MHz, CDCl<sub>3</sub>):** δ 7.33 (dd, *J* = 8.7, 2.3 Hz, 1H), 7.28 (d, *J* = 2.1 Hz, 1H), 7.19 (d, *J* = 8.7 Hz, 1H), 4.99 (s, 1H), 4.78 (s, 1H), 3.31 (s, 3H), 1.81 (s, 3H), 1.29 (s, 9H). **<sup>13</sup>C NMR (100 MHz, CDCl<sub>3</sub>):** δ 171.5, 153.0, 141.9, 139.9, 136.9, 126.5, 125.79, 121.8, 119.3, δ 118.5 (q, *J* = 320.1 Hz), 37.3, 34.8, 31.1, 19.9. **<sup>19</sup>F NMR (376 MHz, CDCl<sub>3</sub>):** δ -74.00 (s).

**HRMS (ESI):** *m/z* Calcd for C<sub>16</sub>H<sub>20</sub>F<sub>3</sub>NO<sub>4</sub>SNa [M+Na]<sup>+</sup> 402.0963; found: *m/z* 402.0983.

#### 4-Methoxy-2-(*N*-methylmethacrylamido)phenyl trifluoromethanesulfonate (**1e**)<sup>[3]</sup>

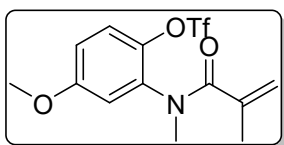

According to general procedure, **1e** was obtained in 39% yield (4.9 g, over five steps) as a brown oil.

**<sup>1</sup>H NMR (400 MHz, CDCl<sub>3</sub>):** δ 7.15 (d, *J* = 9.4 Hz, 1H), 6.83 – 6.77 (m, 2H), 5.04 (s, 1H), 4.81 (s, 1H), 3.77 (s, 3H), 3.29 (s, 3H), 1.85 (s, 3H). **<sup>13</sup>C NMR (100 MHz, CDCl<sub>3</sub>):** δ 171.3, 159.6, 139.7, 138.6, 137.9, 123.2, 119.5, δ 118.5 (q, *J* = 320.2 Hz), 114.2, 113.5, 6.85, 37.4, 19.7. **<sup>19</sup>F NMR (376 MHz, CDCl<sub>3</sub>):** δ -73.74 (s).

#### 4-Fluoro-2-(*N*-methylmethacrylamido)phenyl trifluoromethanesulfonate (**1f**)

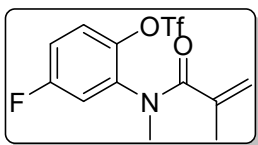

According to general procedure, **1f** was obtained in 23% yield (3.0 g, over five steps) as a brown oil.



**<sup>1</sup>H NMR (400 MHz, CDCl<sub>3</sub>):** δ 7.29 (dd, *J* = 9.1, 5.0 Hz, 1H), 7.14 – 7.03 (m, 2H), 5.16 (s, 1H), 4.92 (s, 1H), 3.35 (s, 3H), 1.93 (s, 3H). **<sup>13</sup>C NMR (100 MHz, CDCl<sub>3</sub>):** δ 171.1, 162.7, 160.2, 140.5, 139.4, 139.1, 123.7 (d, *J* = 9.8 Hz), 119.6, δ 118.4 (q, *J* = 320.2 Hz), 116.0, 115.7 (dd, *J* = 39.6, 24.1 Hz), 37.4, 19.5. **<sup>19</sup>F NMR (376 MHz, CDCl<sub>3</sub>):** δ -73.73 (s), -109.69 (s).

**HRMS (ESI):** *m/z* Calcd for C<sub>12</sub>H<sub>12</sub>F<sub>4</sub>NO<sub>4</sub>S [M+H]<sup>+</sup> 342.0423; found: *m/z* 342.0434.

#### 5-Fluoro-2-(*N*-methylmethacrylamido)phenyl trifluoromethanesulfonate (**1g**)

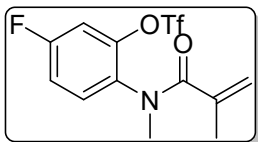

According to general procedure, **1g** was obtained in 27% yield (2.7 g, over five steps) as a white solid. Melting point: 41.3 - 42.6 °C.

**<sup>1</sup>H NMR (400 MHz, CDCl<sub>3</sub>):** δ 7.37 – 7.30 (m, 1H), 7.20 – 7.11 (m, 1H), 7.08 (dd, *J* = 7.9, 2.5 Hz, 1H), 5.08 (s, 1H), 4.78 (s, 1H), 3.32 (s, 3H), 1.88 (s, 3H). **<sup>13</sup>C NMR (100 MHz, CDCl<sub>3</sub>):** δ 171.5, 164.9, 147.7, 139.6, 131.4, 130.4, 130.0, 122.8, 120.3, δ 118.6 (q, *J* = 320.3 Hz), 52.9, 19.9. **<sup>19</sup>F NMR (376 MHz, CDCl<sub>3</sub>):** δ -73.71 (d, *J* = 60.1 Hz), -73.82 – -73.86 (m), -108.72 (s).

**HRMS (ESI):** *m/z* Calcd for C<sub>12</sub>H<sub>12</sub>F<sub>4</sub>NO<sub>4</sub>S [M+H]<sup>+</sup> 342.0423; found: *m/z* 342.0423.

#### 4-Chloro-2-(*N*-methylmethacrylamido)phenyl trifluoromethanesulfonate (**1h**)<sup>[2]</sup>

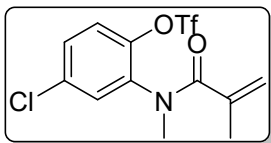

According to general procedure, **1h** was obtained in 30% yield (3.7 g, over five steps) as a yellow oil.

**<sup>1</sup>H NMR (400 MHz, CDCl<sub>3</sub>):** δ 7.35 (d, *J* = 2.4 Hz, 1H), 7.30 (dd, *J* = 8.8, 2.3 Hz, 1H), 7.22 (d, *J* = 8.8 Hz, 1H), 5.14 (s, 1H), 4.89 (s, 1H), 3.32 (s, 3H), 1.90 (s, 3H). **<sup>13</sup>C NMR (100 MHz, CDCl<sub>3</sub>):** δ 171.2, 143.0, 139.4, 138.8, 134.6, 129.0, 128.8, 123.6, 119.8, 118.4 (q, *J* = 320.4 Hz), 37.7, 19.7. **<sup>19</sup>F NMR (376 MHz, CDCl<sub>3</sub>):** δ -73.70 (s).

### 3-(*N*-Methylmethacrylamido)-[1,1'-biphenyl]-4-yl trifluoromethanesulfonate (**1i**)<sup>[4]</sup>

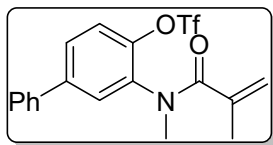

According to general procedure, **1i** was obtained in 31% yield (2.5 g, over five steps) as a brown solid. Melting point: 64.5 - 66.7 °C.

**<sup>1</sup>H NMR (400 MHz, CDCl<sub>3</sub>):** δ 7.55 (td, *J* = 5.3, 2.7 Hz, 4H), 7.47 (t, *J* = 7.3 Hz, 2H), 7.42 (d, *J* = 7.1 Hz, 1H), 7.40 – 7.36 (m, 1H), 5.13 (s, 1H), 4.91 (s, 1H), 3.42 (s, 3H), 1.94 (s, 3H). **<sup>13</sup>C NMR (100 MHz, CDCl<sub>3</sub>):** δ 171.4, 143.6, 142.8, 139.7, 138.4, 129.1, 128.5, 127.5, 127.2, 127.1, 122.8, 119.8, 118.5 (q, *J* = 320.3 Hz), 37.5, 29.7, 19.9. **<sup>19</sup>F NMR (376 MHz, CDCl<sub>3</sub>):** δ -73.69 (s).

### 5-Methyl-2-(*N*-methylmethacrylamido)phenyl trifluoromethanesulfonate (**1j**)<sup>[2]</sup>

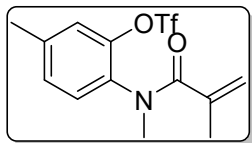

According to general procedure, **1j** was obtained in 29% yield (3.9 g, over five steps) as a brown oil.

**<sup>1</sup>H NMR (400 MHz, CDCl<sub>3</sub>):** δ 7.24 – 7.13 (m, 2H), 7.06 (s, 1H), 4.99 (s, 1H), 4.75 (s, 1H), 3.27 (s, 3H), 2.41 – 2.28 (m, 3H), 1.81 (s, 3H). **<sup>13</sup>C NMR (100 MHz, CDCl<sub>3</sub>):** δ 171.5, 143.9, 139.7, 134.9, 130.0, 128.7, 122.8, 119.4, 118.5 (q, *J* = 320.1 Hz), 37.3, 21.0, 19.8. **<sup>19</sup>F NMR (376 MHz, CDCl<sub>3</sub>):** δ -74.02 (s).

### 5-Ethyl-2-(*N*-methylmethacrylamido)phenyl trifluoromethanesulfonate (**1k**)

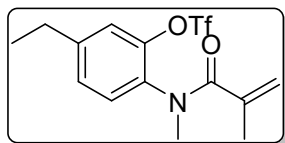

According to general procedure, **1k** was obtained in 6% yield (0.56 g, over five steps) as a yellow oil.

**<sup>1</sup>H NMR (400 MHz, CDCl<sub>3</sub>):** δ 7.22 (d, *J* = 11.0 Hz, 2H), 7.12 (s, 1H), 5.04 (s, 1H), 4.79 (s, 1H), 3.33 (s, 3H), 2.69 (q, *J* = 7.6 Hz, 2H), 1.86 (s, 3H), 1.25 (t, *J* = 7.6 Hz, 3H).

**<sup>13</sup>C NMR (100 MHz, CDCl<sub>3</sub>):** δ 171.6, 146.0, 144.2, 139.9, 135.2, 128.8 (d, *J* = 12.6 Hz), 121.8, 119.6, 118.6 (q, *J* = 320.3 Hz), 37.4, 28.4, 20.0, 15.0. **<sup>19</sup>F NMR (376 MHz, CDCl<sub>3</sub>):** δ -73.83 (s).

**HRMS (ESI):** *m/z* Calcd for C<sub>14</sub>H<sub>16</sub>F<sub>3</sub>NO<sub>4</sub>SNa [M+Na]<sup>+</sup> 374.0650; found: *m/z* 474.0654.

### Methyl 4-(*N*-methylmethacrylamido)-3-(((trifluoromethyl)sulfonyl)oxy)benzoate (**1l**)

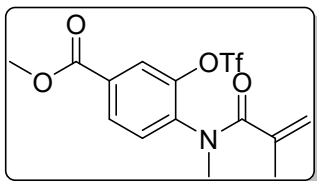

According to general procedure, **1l** was obtained in 39% yield (5.9 g, over five steps) as a yellow solid. Melting point: 41.3 - 44.3 °C.

**<sup>1</sup>H NMR (400 MHz, CDCl<sub>3</sub>):** δ 8.14 – 7.97 (m, 2H), 7.38 (d, *J* = 8.4 Hz, 1H), 4.94 (d, *J* = 135.2 Hz, 2H), 3.94 (s, 3H), 3.38 (s, 3H), 1.92 (s, 3H). **<sup>13</sup>C NMR (100 MHz, CDCl<sub>3</sub>):** δ 171.4, 164.9, 147.6, 139.6, 138.1, 131.4, 130.4, 130.0, 122.7, 120.4, 118.6 (q, *J* = 320.4 Hz), 52.9, 37.5, 19.9. **<sup>19</sup>F NMR (376 MHz, CDCl<sub>3</sub>):** δ -73.55 (s).

**HRMS (ESI):** *m/z* Calcd for C<sub>14</sub>H<sub>14</sub>F<sub>3</sub>NO<sub>6</sub>SNa [M+Na]<sup>+</sup> 404.0392; found: *m/z* 404.0405.

### 1-Methacryloyl-1,2,3,4-tetrahydroquinolin-8-yl trifluoromethanesulfonate (**1m**)

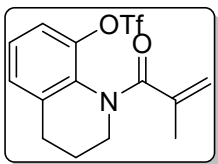

According to general procedure, **1m** was obtained in 45% yield (2.2 g, over four steps) as a white solid. Melting point: 52.5 - 55.3 °C.

**<sup>1</sup>H NMR (400 MHz, CDCl<sub>3</sub>):** δ 7.22 – 7.14 (m, 2H), 7.10 (dd, *J* = 7.0, 2.6 Hz, 1H), 5.19 (s, 1H), 4.76 (s, 1H), 4.20 (s, 1H), 3.45 (s, 1H), 2.89 – 2.64 (m, 2H), 2.17 (s, 1H), 2.01 (s, 3H), 1.85 (s, 1H). **<sup>13</sup>C NMR (100 MHz, CDCl<sub>3</sub>):** δ 171.5, 143.2, 140.0, 136.5, 133.0, 128.2, 126.3, 120.1, 119.2, 118.7 (q, *J* = 320.8 Hz), 43.6, 26.5, 24.5, 19.4. **<sup>19</sup>F NMR (376 MHz, CDCl<sub>3</sub>):** δ -73.49 (s).

**HRMS (ESI):** *m/z* Calcd for C<sub>14</sub>H<sub>14</sub>F<sub>3</sub>NO<sub>4</sub>SNa [M+Na]<sup>+</sup> 372.0493; found: *m/z* 372.0494.

## 2-(*N*-Methylmethacrylamido)naphthalen-1-yl trifluoromethanesulfonate (**1n**)<sup>[4]</sup>

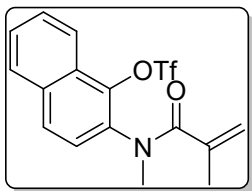

According to general procedure, **1n** was obtained in 16% yield (1.5 g, over five steps) as a brown solid. Melting point: 64.6 - 66.2 °C.

**<sup>1</sup>H NMR (400 MHz, CDCl<sub>3</sub>):** δ 8.07 (d, *J* = 8.4 Hz, 1H), 7.90 (d, *J* = 8.6 Hz, 2H), 7.64 (dt, *J* = 14.9, 7.1 Hz, 2H), 7.41 (d, *J* = 8.8 Hz, 1H), 4.96 (s, 1H), 4.74 (s, 1H), 3.45 (s, 3H), 1.87 (s, 3H). **<sup>13</sup>C NMR (100 MHz, CDCl<sub>3</sub>):** δ 171.5, 139.5, 134.9, 133.5, 129.7, 128.7, 128.2, 127.8, 127.4, 125.4, 121.6, 119.8, 118.7 (q, *J* = 320.4 Hz), 100.1, 37.1, 19.9. **<sup>19</sup>F NMR (376 MHz, CDCl<sub>3</sub>):** δ -73.24 (s).

## 2-Methacrylamidophenyl trifluoromethanesulfonate (**1o**)

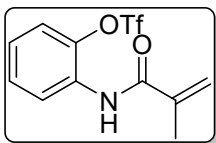

According to general procedure, **1o** was obtained in 41% yield (0.78 g, over four steps) as a white solid. Melting point: 50.7 - 51.8 °C.

**<sup>1</sup>H NMR (400 MHz, CDCl<sub>3</sub>):** δ 8.33 – 8.26 (m, 1H), 7.87 (s, 1H), 7.36 (t, *J* = 7.9 Hz, 1H), 7.28 (dd, *J* = 9.9, 2.6 Hz, 1H), 7.21 – 7.12 (m, 1H), 5.89 (s, 1H), 5.52 (s, 1H), 2.05 (s, 3H). **<sup>13</sup>C NMR (100 MHz, CDCl<sub>3</sub>):** δ 166.3, 139.9, 139.4, 130.7, 129.2, 125.4, 124.0, 121.7, 121.5, 118.6 (q, *J* = 320.3 Hz), 18.5. **<sup>19</sup>F NMR (376 MHz, CDCl<sub>3</sub>):** δ -73.59 (s). **HRMS (ESI):** *m/z* Calcd for C<sub>11</sub>H<sub>10</sub>F<sub>3</sub>NO<sub>4</sub>SNa [M+Na]<sup>+</sup> 332.0180; found: *m/z* 332.0175.

## 2-(*N*-Benzylmethacrylamido)phenyl trifluoromethanesulfonate (**1p**)<sup>[2]</sup>

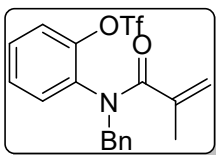

According to general procedure, **1p** was obtained in 18% yield (3.6 g, over five steps) as a yellow solid. Melting point: 55.6 - 56.4 °C.

**<sup>1</sup>H NMR (400 MHz, CDCl<sub>3</sub>):** δ 7.37 – 7.28 (m, 7H), 7.24 (dd, *J* = 8.3, 4.1 Hz, 1H), 7.00 (d, *J* = 7.8 Hz, 1H), 5.80 (s, 1H), 5.12 (s, 1H), 4.90 (s, 1H), 4.15 (s, 1H), 1.94 (s, 3H). **<sup>13</sup>C NMR (100 MHz, CDCl<sub>3</sub>):** δ 171.5, 144.6, 139.9, 137.5, 136.5, 130.1, 129.1, 128.9, 128.8, 128.5, 127.8, 122.4, 120.0, 118.6 (q, *J* = 320.2 Hz), 52.7, 19.9. **<sup>19</sup>F NMR (376 MHz, CDCl<sub>3</sub>):** δ -73.75 (s).

### 2-(2-Benzyl-*N*-methylacrylamido)phenyl trifluoromethanesulfonate (**1q**)<sup>[2]</sup>

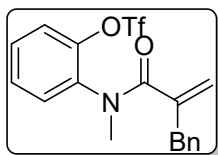

According to general procedure, **1q** was obtained in 43% yield (2.3 g, over five steps) as a yellow oil.

**<sup>1</sup>H NMR (400 MHz, CDCl<sub>3</sub>):** δ 7.44 – 6.75 (m, 9H), 5.05 (t, *J* = 103.0 Hz, 2H), 3.89 – 2.98 (m, 5H). **<sup>13</sup>C NMR (100 MHz, CDCl<sub>3</sub>):** δ 171.0, 144.4, 143.6, 137.7, 137.4, 129.5, 129.2, 129.0, 128.5, 126.6, 122.3, 119.4, 118.5 (q, *J* = 320.2 Hz), 39.5, 37.3. **<sup>19</sup>F NMR (376 MHz, CDCl<sub>3</sub>):** δ -73.83 (s).

### 2-(*N*-Methyl-2-phenylacrylamido)phenyl trifluoromethanesulfonate (**1r**)<sup>[2]</sup>

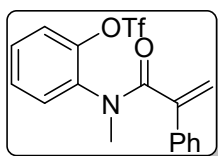

According to general procedure, **1r** was obtained in 47% yield (4.0 g, over five steps) as a yellow oil. Two rotamers were observed in 3:1 ratio.

**<sup>1</sup>H NMR (400 MHz, CDCl<sub>3</sub>):** δ 7.54 (d, *J* = 6.5 Hz, 0.67H), 7.45 – 7.33 (m, 2.44H), 7.24 – 7.14 (m, 5H), 7.05 (d, *J* = 7.2 Hz, 3H), 6.89 (d, *J* = 7.8 Hz, 1H), 5.87 (s, 0.3H), 5.64 (s, 0.3H), 5.51 (s, 1H), 5.43 (s, 1H), 3.36 (s, 3H), 3.25 (s, 1H). **<sup>13</sup>C NMR (100 MHz, CDCl<sub>3</sub>):** δ 170.5, 145.4, 144.6, 136.5, 136.2, 130.6, 129.4, 129.1, 128.9, 128.7, 128.4, 128.1, 125.9, 122.3, 121.9, 118.9, 118.5 (q, *J* = 320.0 Hz), 115.5, 39.5, 37.2. **<sup>19</sup>F NMR (376 MHz, CDCl<sub>3</sub>):** δ -73.68 (s), -73.99 (s).

### 2-(*N*-Methyl-2-methylenebutanamido)phenyl trifluoromethanesulfonate (**1s**)

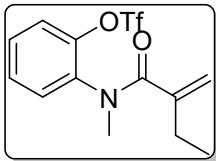

According to general procedure, **1s** was obtained in 36% yield (1.5 g, over five steps) as a yellow oil.

**<sup>1</sup>H NMR (400 MHz, CDCl<sub>3</sub>):** δ 7.49 – 7.30 (m, 4H), 5.05 (s, 1H), 4.90 (s, 1H), 3.36 (s, 3H), 2.26 (s, 2H), 1.02 (s, 3H). **<sup>13</sup>C NMR (100 MHz, CDCl<sub>3</sub>):** δ 171.9, 145.6, 144.5, 137.7, 129.4, 129.3, 129.1, 122.5, 117.4, 118.6 (q, *J* = 320.1 Hz), 37.6, 25.9, 11.8. **<sup>19</sup>F NMR (376 MHz, CDCl<sub>3</sub>):** δ -73.85 (s).

**HRMS (ESI):** *m/z* Calcd for C<sub>13</sub>H<sub>14</sub>F<sub>3</sub>NO<sub>4</sub>SNa [M+Na]<sup>+</sup> 360.0493; found: *m/z* 360.0500.

### 2-(*N*,3-Dimethyl-2-methylenebutanamido)phenyl trifluoromethanesulfonate (**1t**)<sup>[2]</sup>

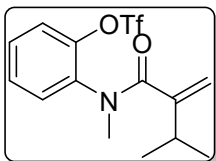

According to general procedure, **1t** was obtained in 41% yield (1.8 g, over five steps) as a white solid. Melting point: 57.4 - 60.5 °C.

**<sup>1</sup>H NMR (400 MHz, CDCl<sub>3</sub>):** δ 7.51 – 7.28 (m, 4H), 5.34 (s, 1H), 5.07 (s, 1H), 3.36 (s, 3H), 2.62 (m, 1H), 1.24 – 0.88 (m, 6H). **<sup>13</sup>C NMR (100 MHz, CDCl<sub>3</sub>):** δ 172.1, 150.3, 144.8, 137.4, 130.1, 129.2, 122.4, 118.6 (q, *J* = 320.1 Hz), 116.4, 113.4, 39.6, 37.6, 31.1, 22.2, 21.3. **<sup>19</sup>F NMR (376 MHz, CDCl<sub>3</sub>):** -73.86 (s).

#### 4、 General procedure for the synthesis of chiral 3-cyanomethyl oxindoles

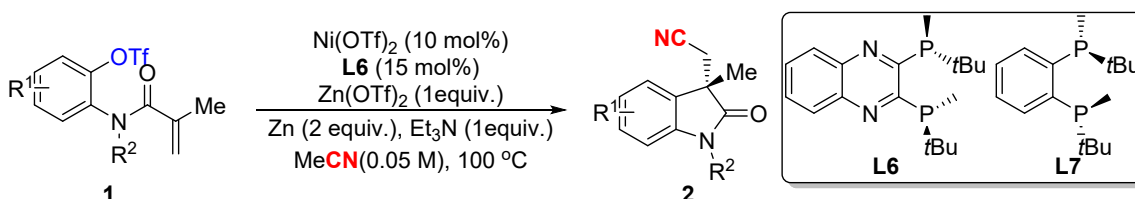

To a 25 mL of Schlenk tube equipped with a magnetic stirring bar were added  $\text{Ni}(\text{OTf})_2$  (3.6 mg, 0.01 mmol, 10 mol%) and **L6** or **L7** (0.015 mmol, 15 mol%) in a  $\text{N}_2$ -filled glovebox. Then the tube was sealed with a septum and taken out of the  $\text{N}_2$ -filled glovebox. The Schlenk tube was evacuated and backfilled with  $\text{N}_2$  for three times, MeCN (1 mL) was added and the mixture was stirred at r.t. for 30 min. Then Zn powder (13 mg, 2 equiv) was added and the mixture was stirred for additional 10 min. Reaction color would change from brownish to greenish. Aryl triflate **1** (0.1 mmol, 1 equiv),  $\text{Zn}(\text{OTf})_2$  (36.6 mg, 0.1 mmol, 100 mol%), base (75 mg, 0.6 mmol, 2 equiv) and MeCN (1 mL) were added into the continuous stirring greenish solution and the mixture was heated at 100 °C. After completion of the reaction monitored by TLC, the residue was purified on a silica gel column using petroleum ether/ EtOAc as the eluent to give the pure target product.

## 5、 Characterization data and spectra copies of products

### (S)-2-(1,3-Dimethyl-2-oxoindolin-3-yl)acetonitrile (2a)<sup>[5]</sup>

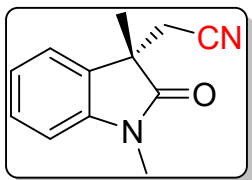

Yellow oil (16.2 mg, 81% yield).

**<sup>1</sup>H NMR (400 MHz, CDCl<sub>3</sub>):**  $\delta$  7.48 (d,  $J = 7.4$  Hz, 1H), 7.36 (td,  $J = 7.8, 1.1$  Hz, 1H), 7.14 (t,  $J = 7.6$  Hz, 1H), 6.91 (d,  $J = 7.8$  Hz, 1H), 3.24 (s, 3H), 2.85 (d,  $J = 16.6$  Hz, 1H), 2.56 (d,  $J = 16.6$  Hz, 1H), 1.53 (s, 3H).

**<sup>13</sup>C NMR (100 MHz, CDCl<sub>3</sub>):**  $\delta$  177.6, 142.8, 131.1, 129.3, 123.3 (d,  $J = 13.5$  Hz), 116.7, 108.8, 45.0, 26.6, 26.4, 22.3.

**Optical Rotation:**  $[\alpha]_D^{25} = 85.3$  ( $c = 0.36$ , CHCl<sub>3</sub>)

92% ee. Determined by HPLC (Daicel Chiralpak AD-H Column, *n*-Hexane: *i*-PrOH = 90:10, flow rate 1.0 mL/min,  $\lambda = 254$  nm):  $t_R = 11.0$  min (major),  $t_R = 9.5$  min (minor).



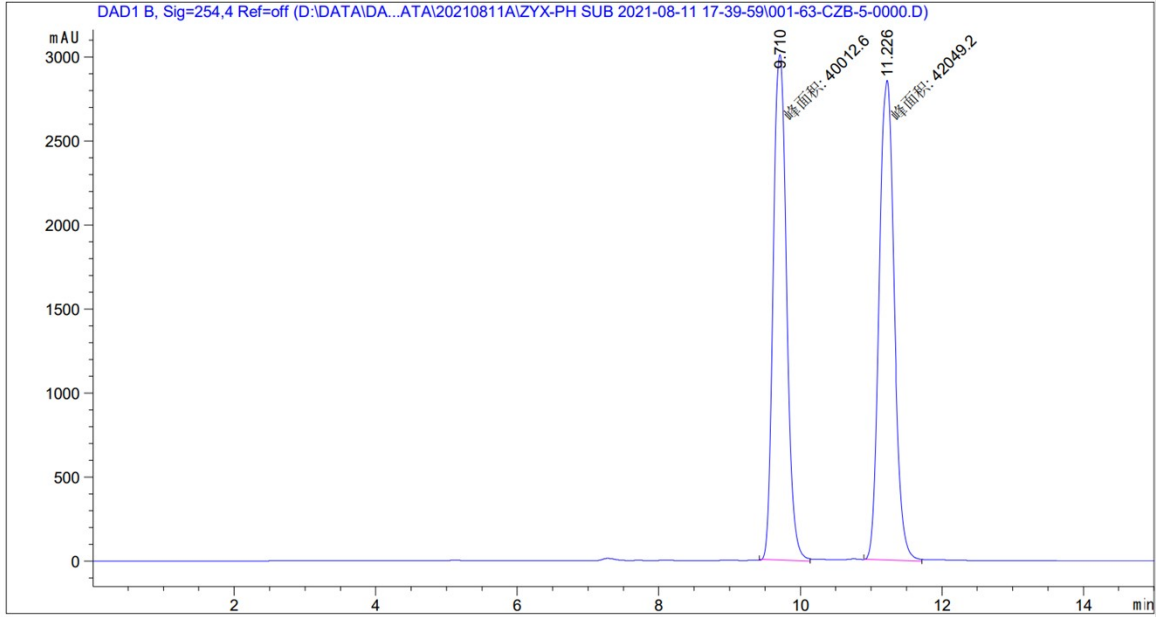

| 峰 # | 保留时间 [min] | 类型 | 峰宽 [min] | 峰面积 [mAU*s] | 峰高 [mAU]   | 峰面积 %   |
|-----|------------|----|----------|-------------|------------|---------|
| 1   | 9.710      | MM | 0.2217   | 4.00126e4   | 3007.48291 | 48.7591 |
| 2   | 11.226     | MM | 0.2455   | 4.20492e4   | 2855.19971 | 51.2409 |

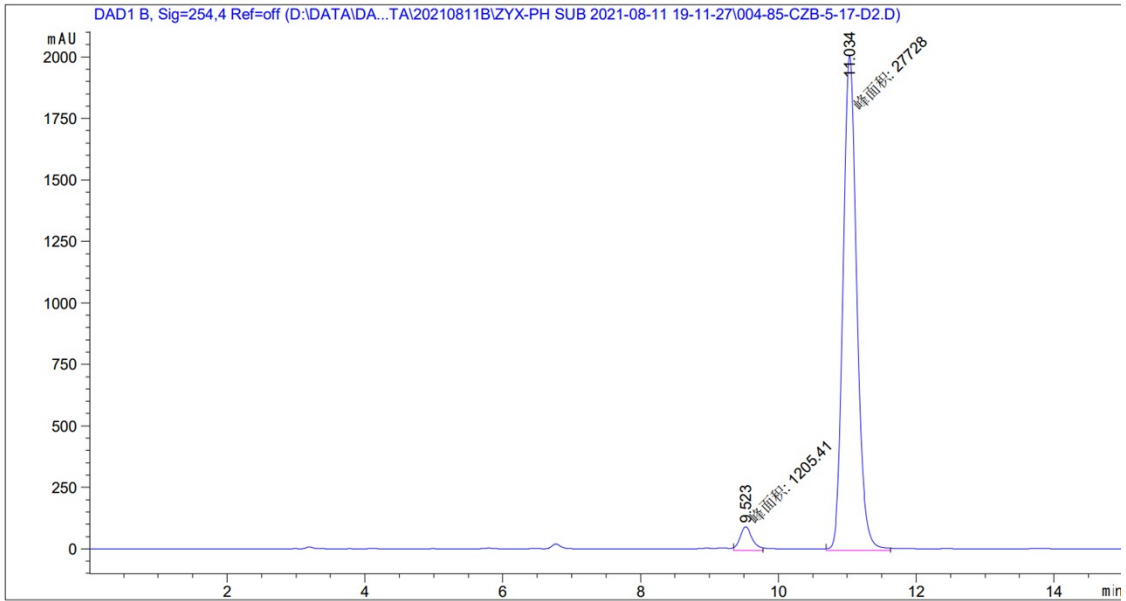

| 峰 # | 保留时间 [min] | 类型 | 峰宽 [min] | 峰面积 [mAU*s] | 峰高 [mAU]   | 峰面积 %   |
|-----|------------|----|----------|-------------|------------|---------|
| 1   | 9.523      | MM | 0.2088   | 1205.40845  | 96.20621   | 4.1661  |
| 2   | 11.034     | MM | 0.2296   | 2.77280e4   | 2012.55627 | 95.8339 |

**(S)-2-(1,3,7-Trimethyl-2-oxoindolin-3-yl)acetonitrile (2b)**

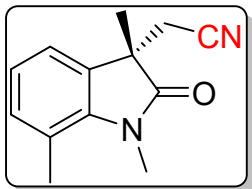

Yellow oil (16.1 mg, 75% yield).

**<sup>1</sup>H NMR (400 MHz, CDCl<sub>3</sub>):** δ 7.29 (d, *J* = 7.3 Hz, 1H), 7.07 (d, *J* = 7.7 Hz, 1H), 7.00 (t, *J* = 7.5 Hz, 1H), 3.52 (s, 3H), 2.81 (d, *J* = 16.6 Hz, 1H), 2.61 – 2.52 (m, 4H), 1.49 (s, 3H).

**<sup>13</sup>C NMR (100 MHz, CDCl<sub>3</sub>):** δ 178.3, 140.5, 132.9, 131.7, 123.2, 121.0, 120.5, 116.7, 44.4, 29.9, 26.7, 22.6, 19.1.

**HRMS (ESI):** *m/z* Calcd for C<sub>13</sub>H<sub>14</sub>N<sub>2</sub>ONa [M+Na]<sup>+</sup> 237.1004; found: *m/z* 237.1015.

**Optical Rotation:** [α]<sub>D</sub><sup>25</sup> = 63.7 (*c* = 0.62, CHCl<sub>3</sub>)

92% ee. Determined by HPLC (Daicel Chiralpak AD-H Column, *n*-Hexane: *i*-PrOH = 90:10, flow rate 1.0 mL/min, λ = 254 nm): *t*<sub>R</sub> = 10.3 min (major), *t*<sub>R</sub> = 7.7 min (minor).

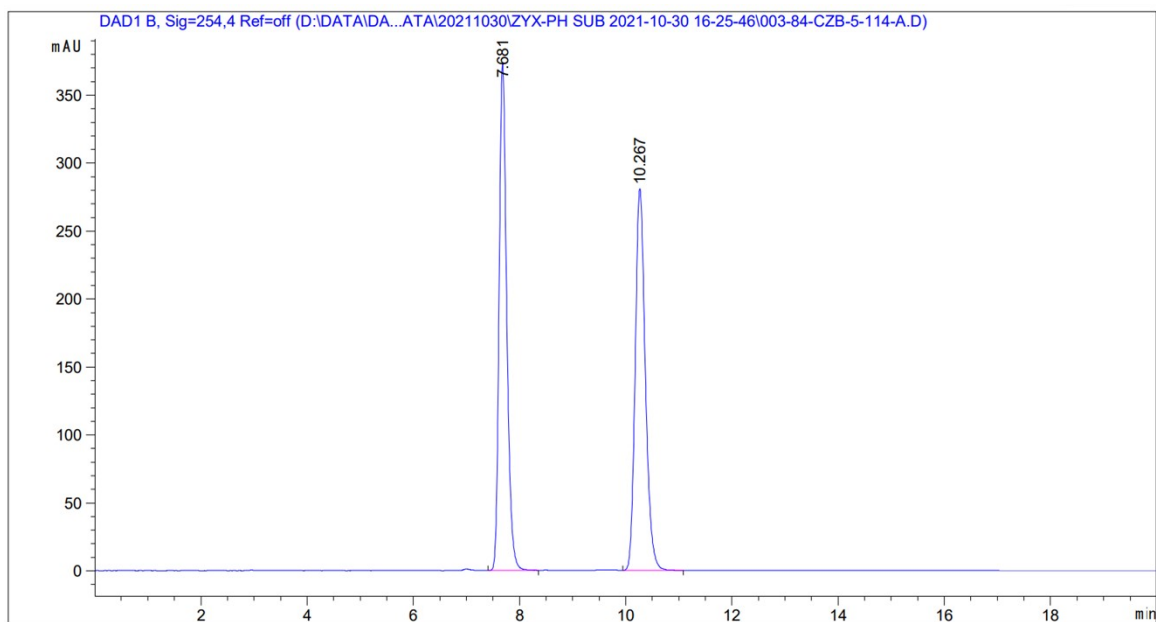

| 峰 # | 保留时间 [min] | 类型 | 峰宽 [min] | 峰面积 [mAU*s] | 峰高 [mAU]  | 峰面积 %   |
|-----|------------|----|----------|-------------|-----------|---------|
| 1   | 7.681      | BB | 0.1524   | 3720.18701  | 372.74234 | 49.9680 |
| 2   | 10.267     | BB | 0.2028   | 3724.95288  | 280.76001 | 50.0320 |

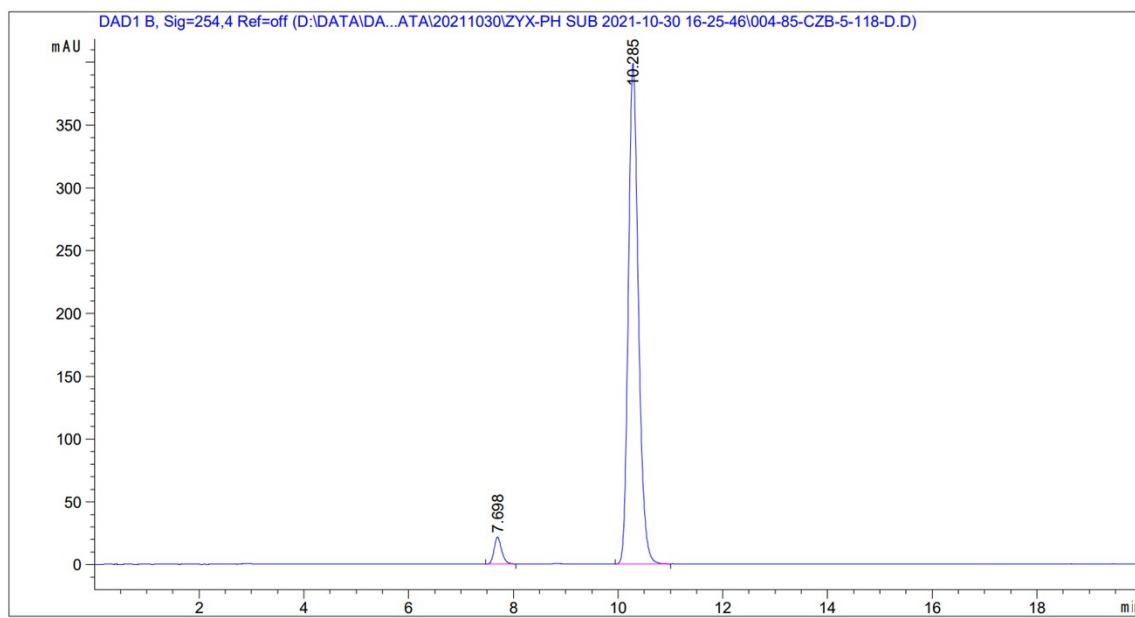

| 峰 # | 保留时间 [min] | 类型 | 峰宽 [min] | 峰面积 [mAU*s] | 峰高 [mAU]  | 峰面积 %   |
|-----|------------|----|----------|-------------|-----------|---------|
| 1   | 7.698      | BB | 0.1499   | 213.97362   | 21.53368  | 3.8733  |
| 2   | 10.285     | BB | 0.2034   | 5310.34668  | 398.69888 | 96.1267 |

**(S)-2-(1,3,6-Trimethyl-2-oxindolin-3-yl)acetonitrile (2c)**<sup>[5]</sup>

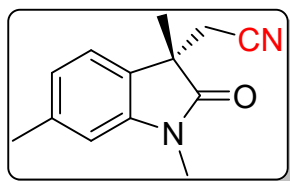

Colorless oil (14.6 mg, 68% yield).

**<sup>1</sup>H NMR (400 MHz, CDCl<sub>3</sub>):** δ 7.35 (d, *J* = 7.6 Hz, 1H), 6.94 (d, *J* = 7.6 Hz, 1H), 6.73 (s, 1H), 3.22 (s, 3H), 2.83 (d, *J* = 16.6 Hz, 1H), 2.54 (d, *J* = 16.6 Hz, 1H), 2.40 (s, 3H), 1.50 (s, 3H).

**<sup>13</sup>C NMR (100 MHz, CDCl<sub>3</sub>):** δ 178.0, 142.9, 139.6, 128.2, 123.9, 123.0, 116.8, 109.7, 44.8, 26.6 (d, *J* = 4.9 Hz), 22.4, 22.0.

**Optical Rotation:**  $[\alpha]_D^{25} = 53.0$  (*c* = 0.54, CHCl<sub>3</sub>)

86% ee. Determined by HPLC (Daicel Chiralpak AD-H Column, *n*-Hexane: *i*-PrOH = 90:10, flow rate 1.0 mL/min, λ = 254 nm): *t*<sub>R</sub> = 9.2 min (major), *t*<sub>R</sub> = 8.0 min (minor).

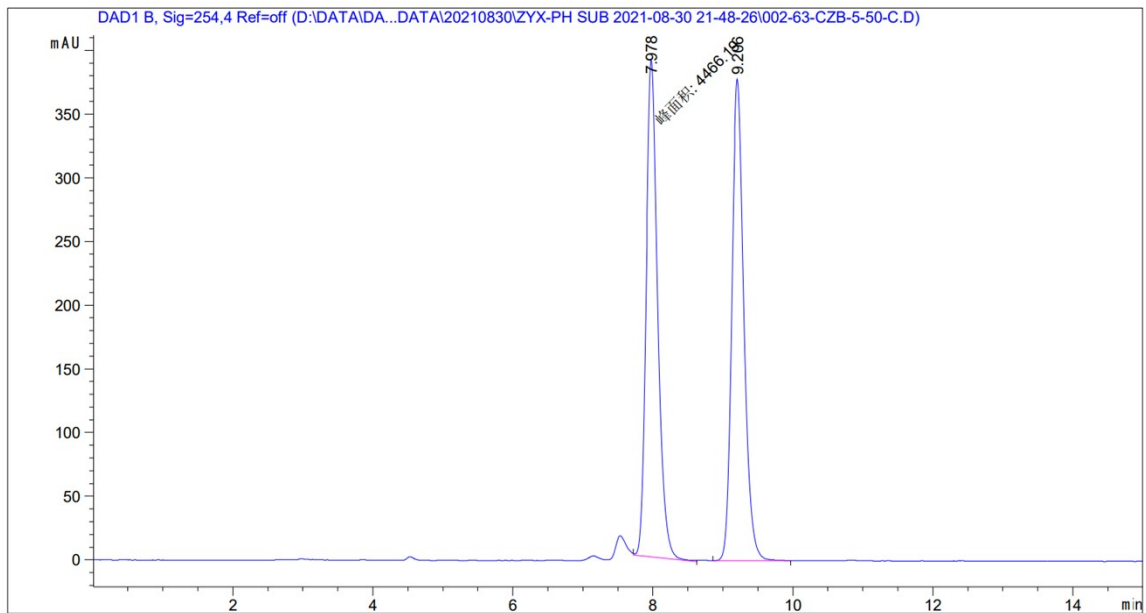

| 峰 # | 保留时间 [min] | 类型 | 峰宽 [min] | 峰面积 [mAU*s] | 峰高 [mAU]  | 峰面积 %   |
|-----|------------|----|----------|-------------|-----------|---------|
| 1   | 7.978      | MM | 0.1909   | 4466.19336  | 389.97540 | 49.5161 |
| 2   | 9.206      | BB | 0.1825   | 4553.48682  | 378.21356 | 50.4839 |

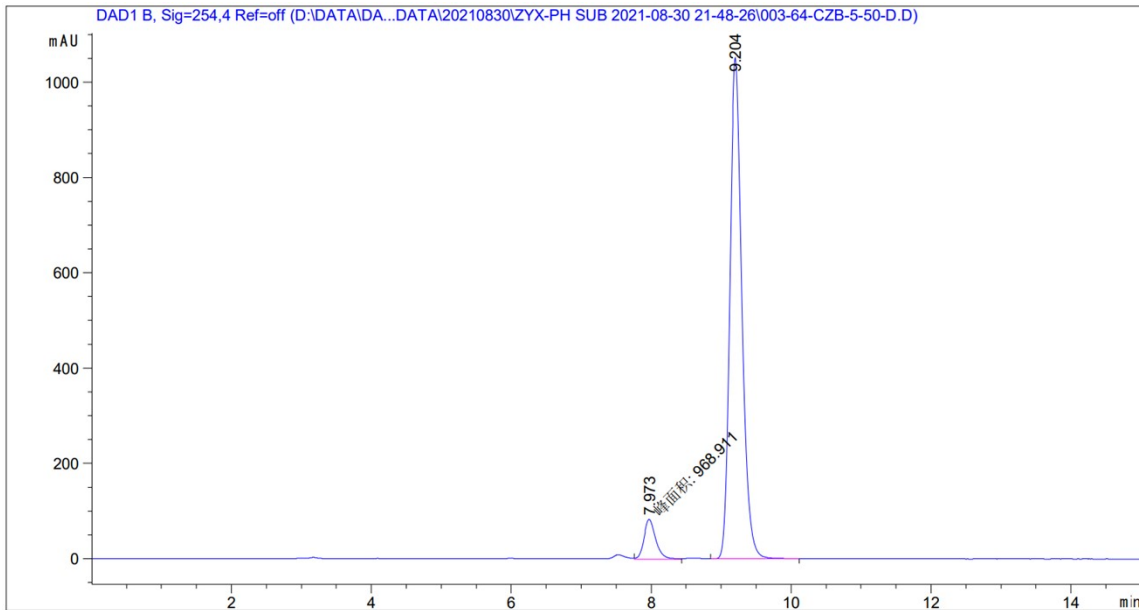

| 峰 # | 保留时间 [min] | 类型 | 峰宽 [min] | 峰面积 [mAU*s] | 峰高 [mAU]   | 峰面积 %   |
|-----|------------|----|----------|-------------|------------|---------|
| 1   | 7.973      | MM | 0.1945   | 968.91071   | 83.04130   | 7.1467  |
| 2   | 9.204      | BB | 0.1838   | 1.25885e4   | 1050.73560 | 92.8533 |

**(S)-2-(6-(tert-Butyl)-1,3-dimethyl-2-oxindolin-3-yl)acetonitrile (2d)**

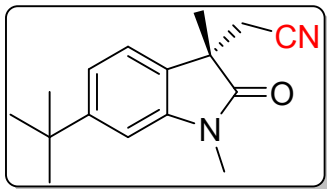

White solid (19.3 mg, 75% yield). Melting point: 98.3 - 103.0 °C.

**<sup>1</sup>H NMR (400 MHz, CDCl<sub>3</sub>):** δ 7.40 (d, *J* = 7.8 Hz, 1H), 7.15 (d, *J* = 7.7 Hz, 1H), 6.90 (s, 1H), 3.25 (s, 3H), 2.84 (d, *J* = 16.6 Hz, 1H), 2.53 (d, *J* = 16.6 Hz, 1H), 1.51 (s, 3H), 1.35 (s, 9H).

**<sup>13</sup>C NMR (100 MHz, CDCl<sub>3</sub>):** δ 178.0, 153.1, 142.7, 128.2, 122.8, 120.2, 116.9, 106.1, 44.7, 35.3, 31.5, 26.6 (d, *J* = 11.5 Hz), 22.3.

**HRMS (ESI):** *m/z* Calcd for C<sub>16</sub>H<sub>20</sub>N<sub>2</sub>ONa [M+Na]<sup>+</sup> 279.1437; found: *m/z* 279.1485.

**Optical Rotation:** [α]<sub>D</sub><sup>25</sup> = 41.4 (*c* = 0.70, CHCl<sub>3</sub>)

93% ee. Determined by HPLC (Daicel Chiralpak AD-H Column, *n*-Hexane: *i*-PrOH = 95:5, flow rate 0.5 mL/min, λ = 254 nm): *t*<sub>R</sub> = 13.9 min (major), *t*<sub>R</sub> = 12.8 min (minor).

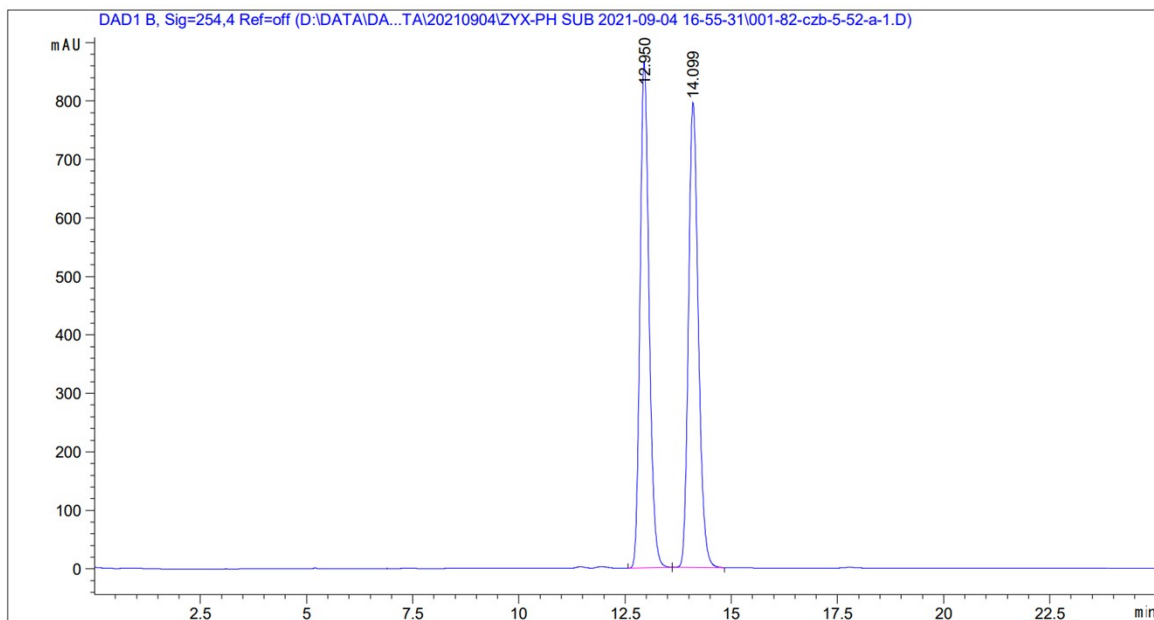

| 峰 # | 保留时间 [min] | 类型 | 峰宽 [min] | 峰面积 [mAU*s] | 峰高 [mAU]  | 峰面积 %   |
|-----|------------|----|----------|-------------|-----------|---------|
| 1   | 12.950     | BB | 0.2289   | 1.28105e4   | 864.47070 | 49.9834 |
| 2   | 14.099     | BB | 0.2483   | 1.28190e4   | 794.23975 | 50.0166 |

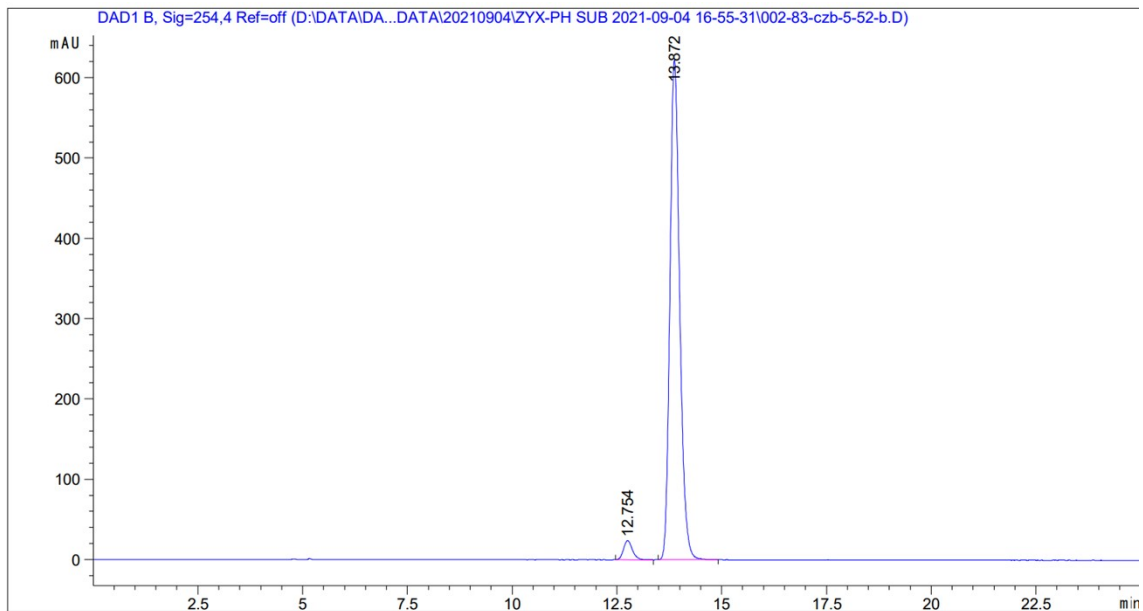

| 峰 # | 保留时间 [min] | 类型 | 峰宽 [min] | 峰面积 [mAU*s] | 峰高 [mAU]  | 峰面积 %   |
|-----|------------|----|----------|-------------|-----------|---------|
| 1   | 12.754     | BB | 0.2247   | 353.57962   | 23.88886  | 3.4008  |
| 2   | 13.872     | BB | 0.2483   | 1.00435e4   | 622.18378 | 96.5992 |

**(S)-2-(6-Methoxy-1,3-dimethyl-2-oxindolin-3-yl)acetonitrile (2e)<sup>[5]</sup>**

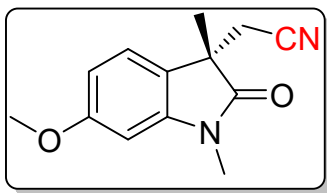

Colorless oil (17.3 mg, 75% yield).

**<sup>1</sup>H NMR (400 MHz, CDCl<sub>3</sub>):**  $\delta$  7.36 (d,  $J$  = 8.2 Hz, 1H), 6.61 (dd,  $J$  = 8.2, 2.2 Hz, 1H), 6.47 (d,  $J$  = 2.2 Hz, 1H), 3.83 (s, 3H), 3.21 (s, 3H), 2.81 (d,  $J$  = 16.6 Hz, 1H), 2.53 (d,  $J$  = 16.6 Hz, 1H), 1.49 (s, 3H).

**<sup>13</sup>C NMR (100 MHz, CDCl<sub>3</sub>):**  $\delta$  178.2, 161.0, 144.1, 123.9, 123.0, 116.9, 106.9, 96.9, 55.7, 44.6, 26.7 (d,  $J$  = 6.1 Hz), 22.5.

**Optical Rotation:**  $[\alpha]_D^{25} = 48.7$  ( $c = 0.74$ ,  $\text{CHCl}_3$ )

82 % ee. Determined by HPLC (Daicel Chiralpak AD-H Column,  $n$ -Hexane:  $i$ -PrOH = 90:10, flow rate 1 mL/min,  $\lambda = 254$  nm):  $t_R = 10.3$  min (major),  $t_R = 9.1$  min (minor).

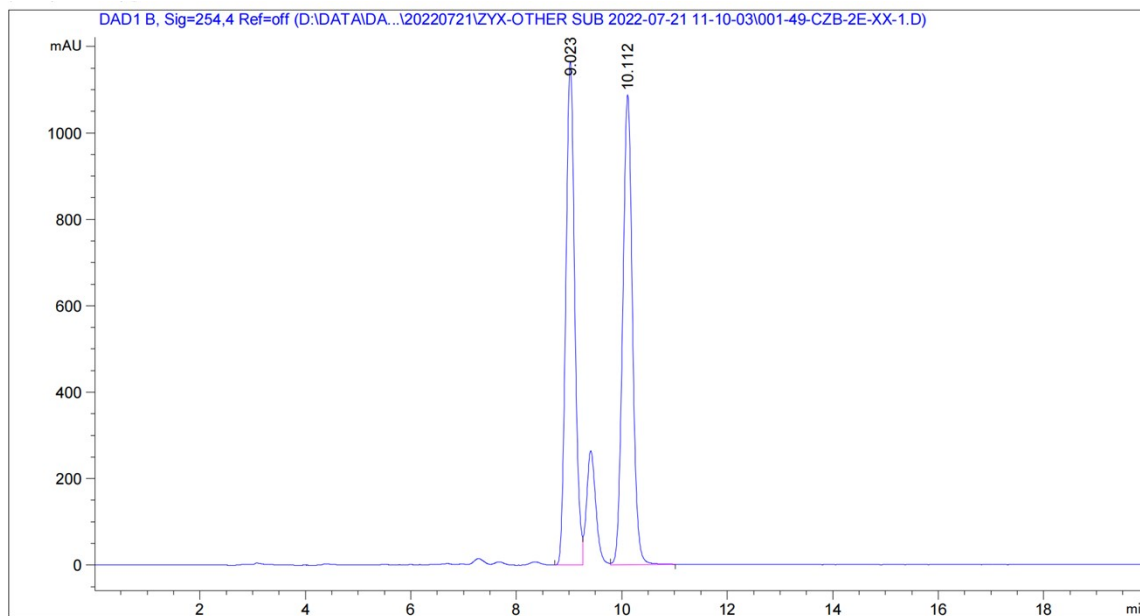

| 峰 # | 保留时间 [min] | 类型 | 峰宽 [min] | 峰面积 [mAU*s] | 峰高 [mAU]   | 峰面积 %   |
|-----|------------|----|----------|-------------|------------|---------|
| 1   | 9.023      | BV | 0.1836   | 1.37278e4   | 1164.22400 | 49.5414 |
| 2   | 10.112     | VB | 0.1980   | 1.39819e4   | 1087.25867 | 50.4586 |

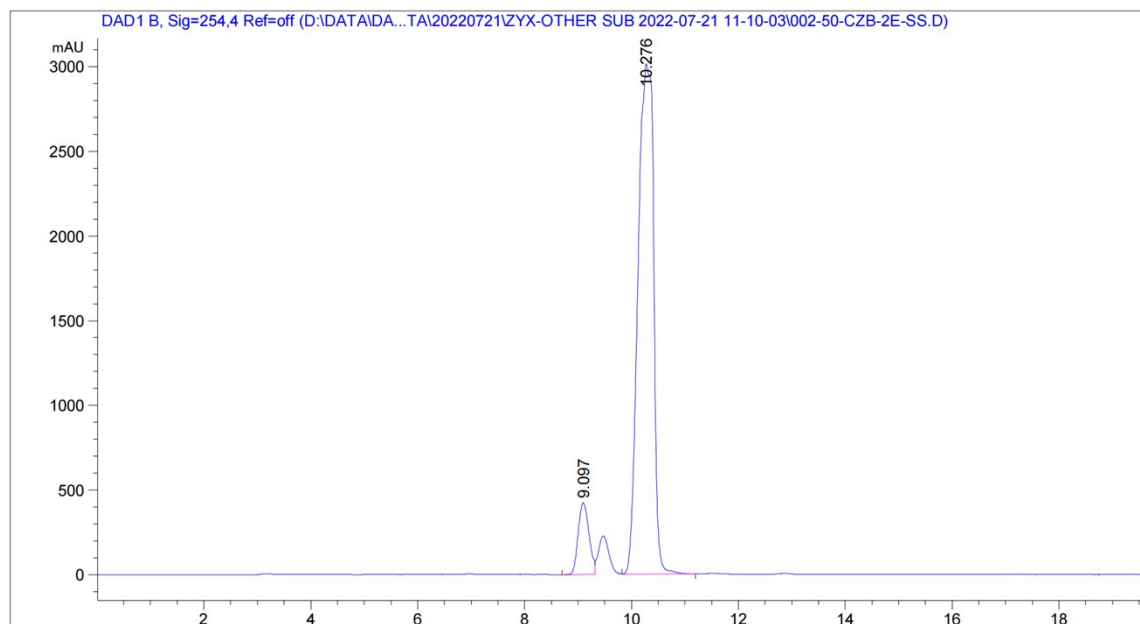

| 峰 # | 保留时间 [min] | 类型 | 峰宽 [min] | 峰面积 [mAU*s] | 峰高 [mAU]   | 峰面积 %   |
|-----|------------|----|----------|-------------|------------|---------|
| 1   | 9.097      | BV | 0.2221   | 5967.75732  | 424.37466  | 8.9135  |
| 2   | 10.276     | VB | 0.2539   | 6.09838e4   | 3015.58887 | 91.0865 |

**(S)-2-(6-Fluoro-1,3-dimethyl-2-oxoindolin-3-yl)acetonitrile (2f)<sup>[5]</sup>**

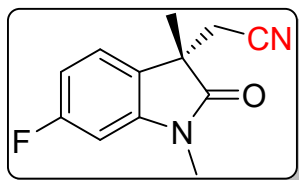

Brown oil (16.4 mg, 75% yield).

**<sup>1</sup>H NMR (400 MHz, CDCl<sub>3</sub>):**  $\delta$  7.41 (dd,  $J = 8.2, 5.2$  Hz, 1H), 6.88 – 6.74 (m, 1H), 6.64 (dd,  $J = 8.7, 2.3$  Hz, 1H), 3.22 (s, 3H), 2.83 (d,  $J = 16.6$  Hz, 1H), 2.55 (d,  $J = 16.6$  Hz, 1H), 1.50 (s, 3H).

**<sup>13</sup>C NMR (100 MHz, CDCl<sub>3</sub>):**  $\delta$  177.9, 164.9, 162.5, 144.4 (d,  $J = 11.6$  Hz), 126.4, 124.4 (d,  $J = 9.9$  Hz), 116.6, 109.6, 109.3, 97.9, 97.6, 44.7, 26.8, 26.5, 22.4.

**Optical Rotation:**  $[\alpha]_D^{25} = 50.1$  ( $c = 0.80$ , CHCl<sub>3</sub>)

91% ee. Determined by HPLC (Daicel Chiralpak AD-H Column, *n*-Hexane: *i*-PrOH = 90:10, flow rate 1 mL/min,  $\lambda = 254$  nm):  $t_R = 11.3$  min (major),  $t_R = 9.8$  min (minor).



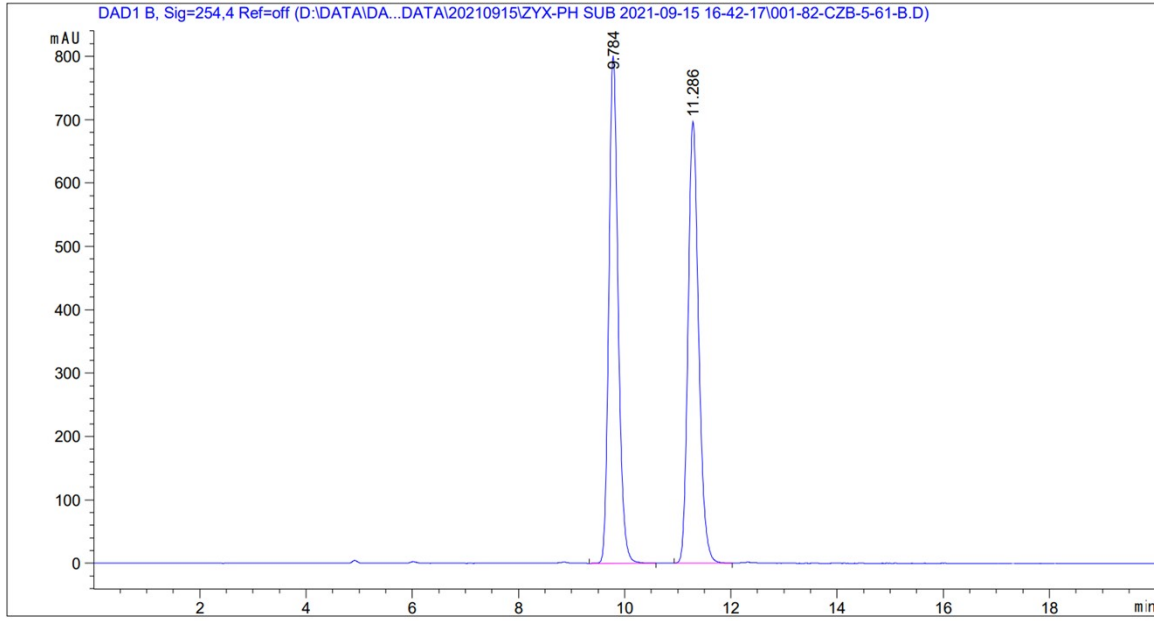

| 峰 # | 保留时间 [min] | 类型 | 峰宽 [min] | 峰面积 [mAU*s] | 峰高 [mAU]  | 峰面积 %   |
|-----|------------|----|----------|-------------|-----------|---------|
| 1   | 9.784      | BB | 0.1851   | 9686.79492  | 801.14459 | 50.0551 |
| 2   | 11.286     | BB | 0.2138   | 9665.47852  | 696.89404 | 49.9449 |

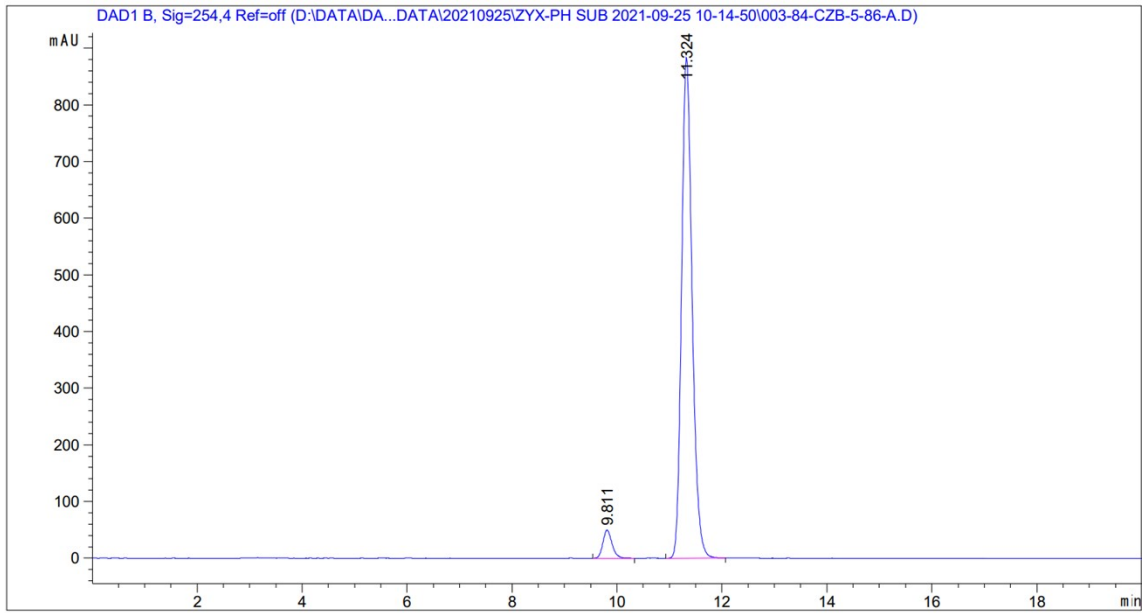

| 峰 # | 保留时间 [min] | 类型 | 峰宽 [min] | 峰面积 [mAU*s] | 峰高 [mAU]  | 峰面积 %   |
|-----|------------|----|----------|-------------|-----------|---------|
| 1   | 9.811      | BB | 0.1852   | 601.83832   | 49.73352  | 4.6522  |
| 2   | 11.324     | BB | 0.2129   | 1.23348e4   | 883.16040 | 95.3478 |

**(S)-2-(5-Fluoro-1,3-dimethyl-2-oxindolin-3-yl)acetonitrile (2g)**

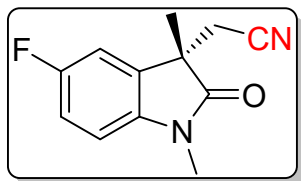

Colorless oil (17.7 mg, 81% yield).

**<sup>1</sup>H NMR (400 MHz, CDCl<sub>3</sub>):**  $\delta$  7.23 (dd,  $J = 7.7, 2.5$  Hz, 1H), 7.06 (td,  $J = 8.8, 2.5$  Hz, 1H), 6.83 (dd,  $J = 8.5, 4.1$  Hz, 1H), 3.24 (s, 3H), 2.85 (d,  $J = 16.7$  Hz, 1H), 2.58 (d,  $J = 16.7$  Hz, 1H), 1.52 (s, 3H).

**<sup>13</sup>C NMR (100 MHz, CDCl<sub>3</sub>):**  $\delta$  177.3, 160.9, 138.8 (d,  $J = 2.0$  Hz), 132.6 (d,  $J = 8.0$  Hz), 116.4, 115.8, 115.5, 111.8, 111.5, 109.4 (d,  $J = 8.1$  Hz), 45.4, 26.8, 26.3, 22.3.

**HRMS (ESI):**  $m/z$  Calcd for C<sub>12</sub>H<sub>11</sub>FN<sub>2</sub>ONa [M+Na]<sup>+</sup> 241.0753; found:  $m/z$  241.0764.

**Optical Rotation:**  $[\alpha]_D^{25} = 32.5$  ( $c = 0.45$ , CHCl<sub>3</sub>)

89% ee. Determined by HPLC (Daicel Chiralpak AD-H Column, *n*-Hexane: *i*-PrOH = 90:10, flow rate 1 mL/min,  $\lambda = 254$  nm):  $t_R = 13.7$  min (major),  $t_R = 10.0$  min (minor).

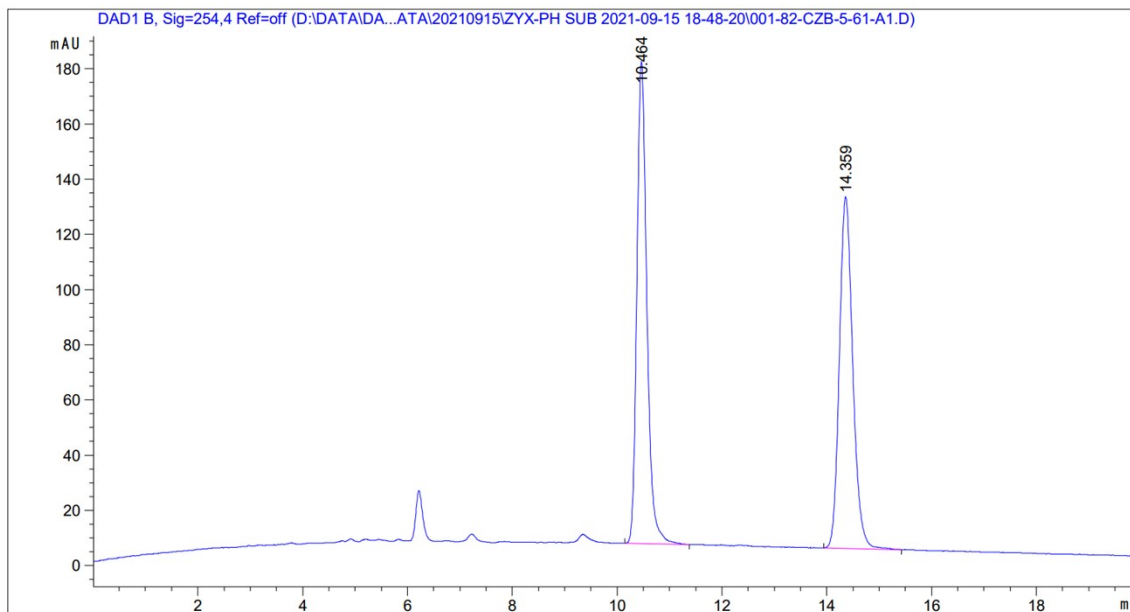

| 峰 # | 保留时间 [min] | 类型 | 峰宽 [min] | 峰面积 [mAU*s] | 峰高 [mAU]  | 峰面积 %   |
|-----|------------|----|----------|-------------|-----------|---------|
| 1   | 10.464     | BB | 0.2015   | 2301.31226  | 174.89610 | 50.4972 |
| 2   | 14.359     | BB | 0.2706   | 2255.99536  | 127.39877 | 49.5028 |

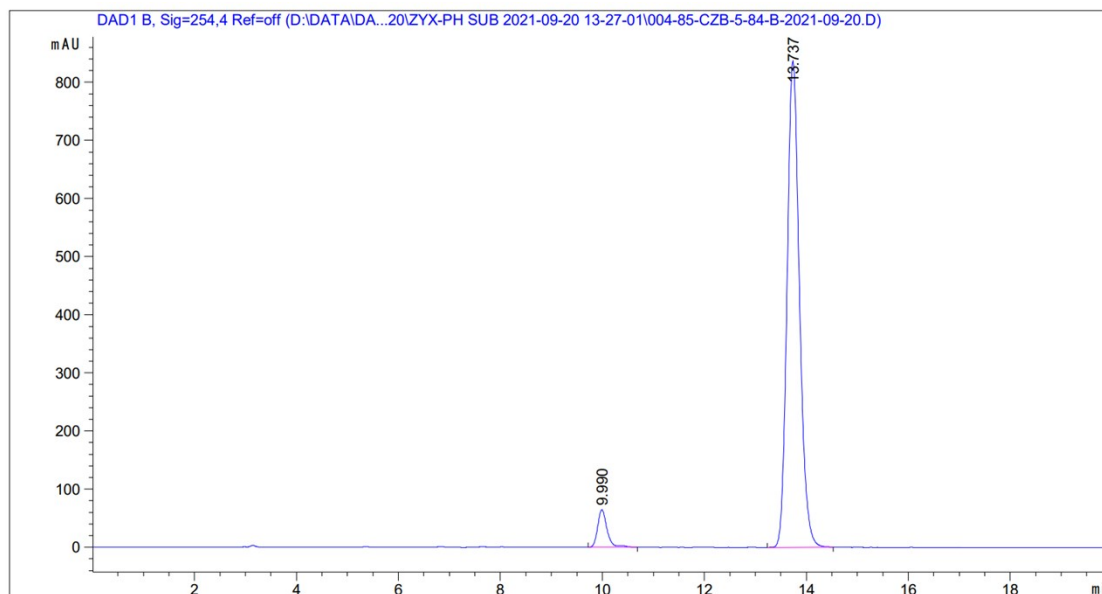

| 峰 # | 保留时间 [min] | 类型   | 峰宽 [min] | 峰面积 [mAU*s] | 峰高 [mAU]  | 峰面积 %   |
|-----|------------|------|----------|-------------|-----------|---------|
| 1   | 9.990      | BV R | 0.1888   | 830.45184   | 64.47003  | 5.5889  |
| 2   | 13.737     | BB   | 0.2596   | 1.40284e4   | 836.83716 | 94.4111 |

**(S)-2-(6-Chloro-1,3-dimethyl-2-oxindolin-3-yl)acetonitrile (2h)**<sup>[5]</sup>

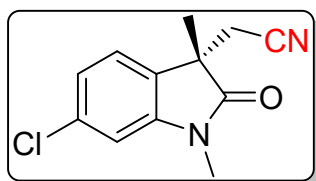

Colorless oil (17.1 mg, 73% yield).

**<sup>1</sup>H NMR (400 MHz, CDCl<sub>3</sub>):** δ 7.39 (d, *J* = 8.0 Hz, 1H), 7.11 (dd, *J* = 7.6, 1.3 Hz, 1H), 6.91 (s, 1H), 3.23 (s, 3H), 2.84 (d, *J* = 16.6 Hz, 1H), 2.55 (d, *J* = 16.6 Hz, 1H), 1.51 (s, 3H).

**<sup>13</sup>C NMR (100 MHz, CDCl<sub>3</sub>):** δ 177.5, 144.1, 135.3, 129.4, 124.3, 123.3, 116.5, 109.7, 44.8, 26.8, 26.4, 22.3.

**Optical Rotation:**  $[\alpha]_D^{25} = 58.6$  (*c* = 0.76, CHCl<sub>3</sub>)

91 % ee. Determined by HPLC (Daicel Chiralpak AD-H Column, *n*-Hexane: *i*-PrOH = 90:10, flow rate 1 mL/min, λ = 254 nm): *t<sub>R</sub>* = 10.7 min (major), *t<sub>R</sub>* = 9.6 min (minor).

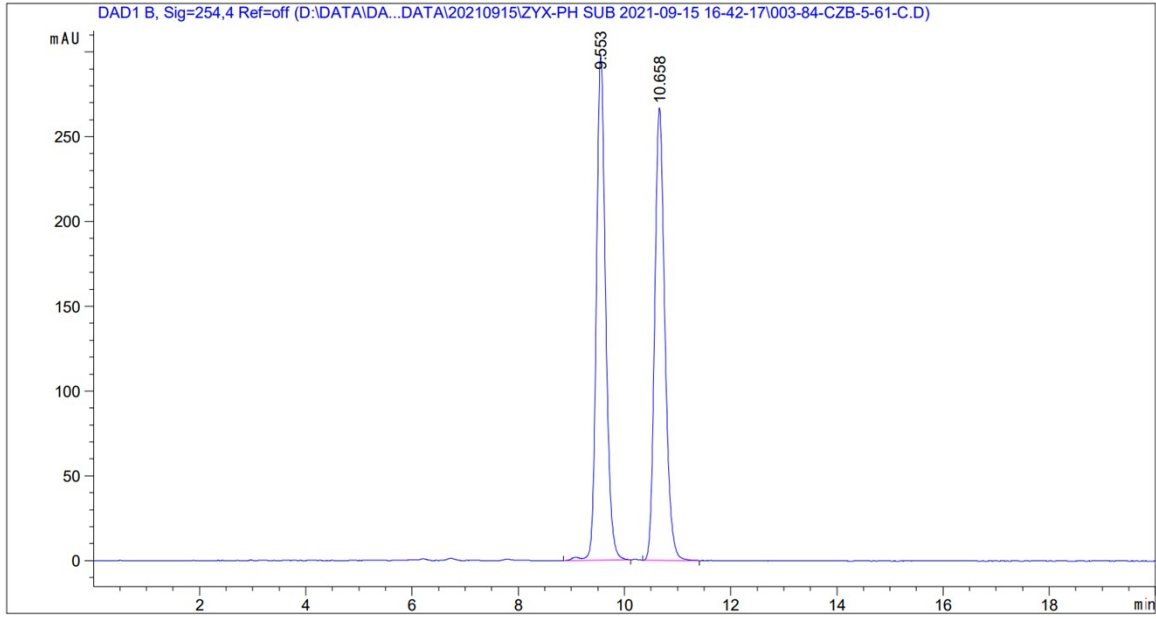

| 峰 # | 保留时间 [min] | 类型   | 峰宽 [min] | 峰面积 [mAU*s] | 峰高 [mAU]  | 峰面积 %   |
|-----|------------|------|----------|-------------|-----------|---------|
| 1   | 9.553      | VB R | 0.1846   | 3610.25073  | 297.45169 | 50.4673 |
| 2   | 10.658     | BB   | 0.2029   | 3543.39551  | 266.84677 | 49.5327 |

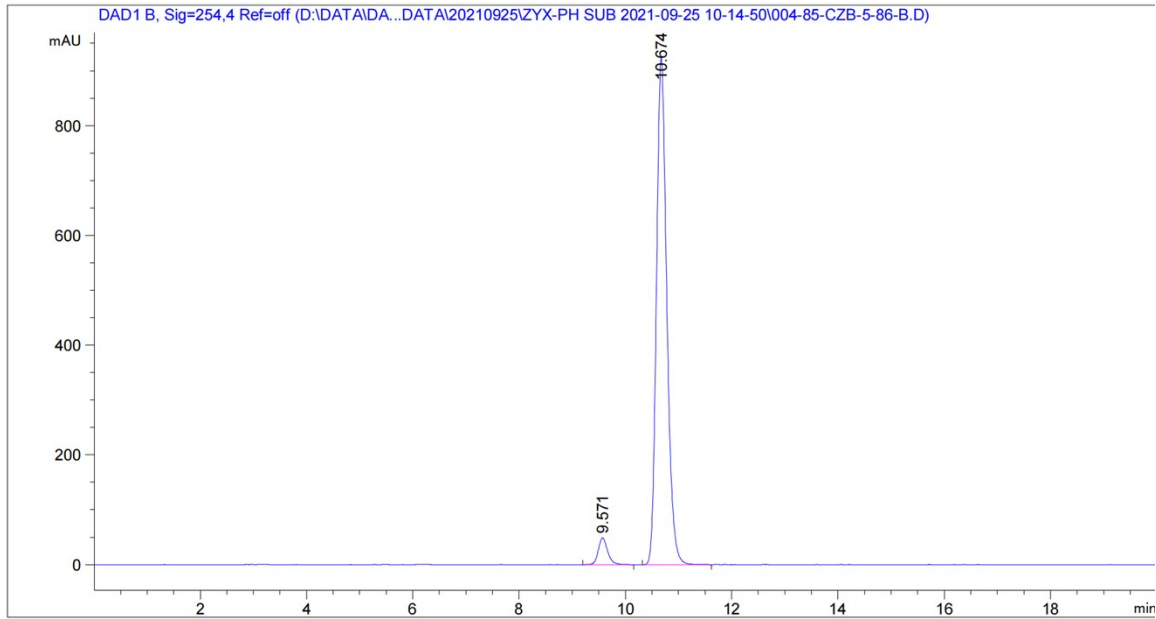

| 峰 # | 保留时间 [min] | 类型 | 峰宽 [min] | 峰面积 [mAU*s] | 峰高 [mAU]  | 峰面积 %   |
|-----|------------|----|----------|-------------|-----------|---------|
| 1   | 9.571      | BB | 0.1852   | 599.55005   | 48.84973  | 4.6031  |
| 2   | 10.674     | BB | 0.2049   | 1.24253e4   | 924.16919 | 95.3969 |

**(S)-2-(1,3-Dimethyl-2-oxo-6-phenylindolin-3-yl)acetonitrile (2i)**<sup>[6]</sup>

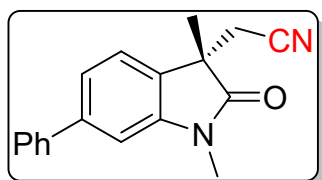

Yellow oil (12.1 mg, 44% yield).

**<sup>1</sup>H NMR (400 MHz, CDCl<sub>3</sub>):**  $\delta$  7.61 – 7.57 (m, 2H), 7.54 (d,  $J = 7.7$  Hz, 1H), 7.47 (t,  $J = 6.6$  Hz, 2H), 7.37 (ddd,  $J = 10.7, 9.2, 4.4$  Hz, 2H), 7.09 (d,  $J = 1.3$  Hz, 1H), 3.30 (s, 3H), 2.89 (d,  $J = 16.6$  Hz, 1H), 2.60 (d,  $J = 16.6$  Hz, 1H), 1.57 (s, 3H).

**<sup>13</sup>C NMR (100 MHz, CDCl<sub>3</sub>):**  $\delta$  177.8, 143.4, 143.0, 140.8, 130.0, 129.0, 128.0, 127.4, 123.5, 122.4, 116.8, 107.8, 44.9, 26.7, 26.5, 22.4.

**Optical Rotation:**  $[\alpha]_D^{25} = 55.1$  ( $c = 0.38$ , CHCl<sub>3</sub>)

86% ee. Determined by HPLC (Daicel Chiralpak AD-H Column, *n*-Hexane: *i*-PrOH = 90:10, flow rate 1 mL/min,  $\lambda = 254$  nm):  $t_R = 13.8$  min (major),  $t_R = 11.8$  min (minor).

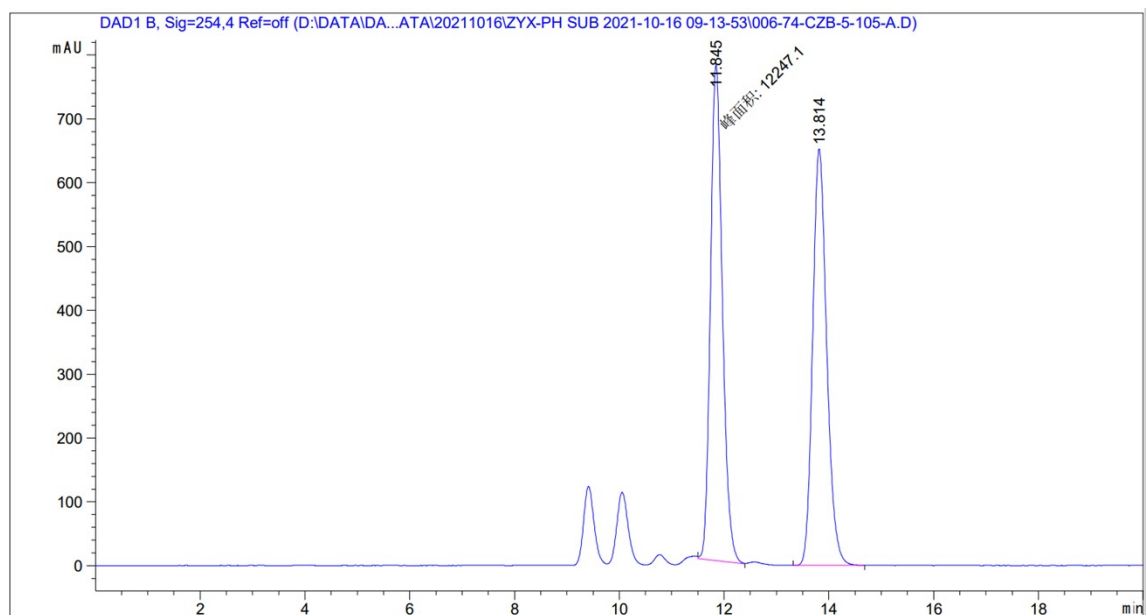

| 峰 # | 保留时间 [min] | 类型 | 峰宽 [min] | 峰面积 [mAU*s] | 峰高 [mAU]  | 峰面积 %   |
|-----|------------|----|----------|-------------|-----------|---------|
| 1   | 11.845     | MM | 0.2627   | 1.22471e4   | 777.10443 | 50.1808 |
| 2   | 13.814     | BB | 0.2873   | 1.21588e4   | 652.92773 | 49.8192 |

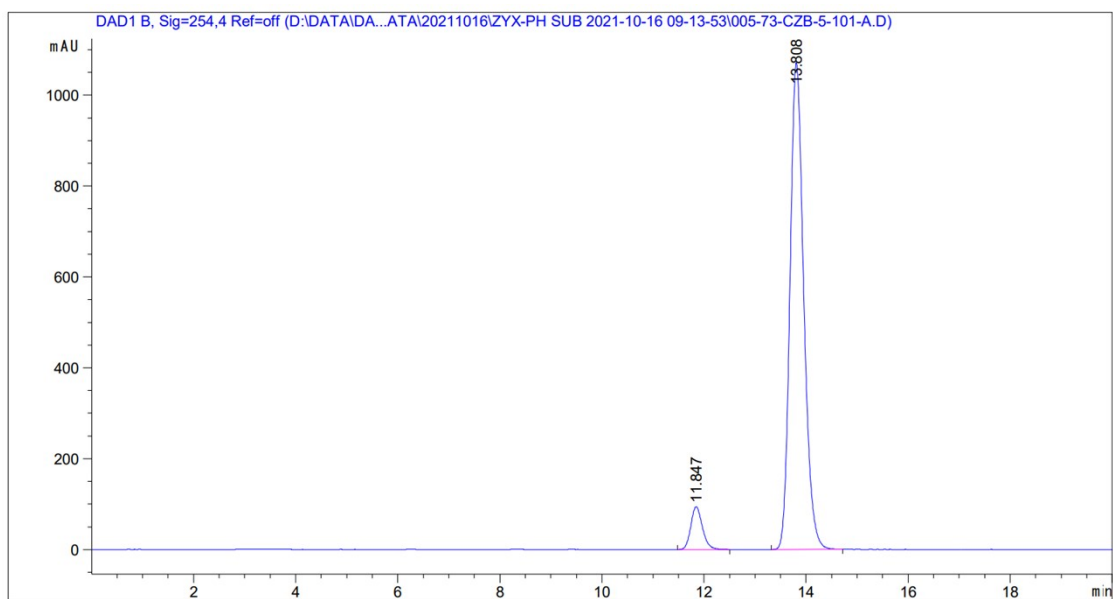

| 峰 # | 保留时间 [min] | 类型 | 峰宽 [min] | 峰面积 [mAU*s] | 峰高 [mAU]   | 峰面积 %   |
|-----|------------|----|----------|-------------|------------|---------|
| 1   | 11.847     | BB | 0.2421   | 1487.71765  | 94.29406   | 6.9173  |
| 2   | 13.808     | BB | 0.2881   | 2.00195e4   | 1070.84741 | 93.0827 |

**(S)-2-(1,3,5-Trimethyl-2-oxindolin-3-yl)acetonitrile (2j)**<sup>[5]</sup>

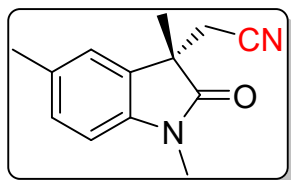

Colorless oil (15.8 mg, 74% yield).

<sup>1</sup>H NMR (400 MHz, CDCl<sub>3</sub>): δ 7.29 (s, 1H), 7.15 (d, *J* = 7.9 Hz, 1H), 6.79 (d, *J* = 7.9 Hz, 1H), 3.22 (s, 3H), 2.84 (d, *J* = 16.6 Hz, 1H), 2.55 (d, *J* = 16.6 Hz, 1H), 2.37 (s, 3H), 1.51 (s, 3H).

<sup>13</sup>C NMR (100 MHz, CDCl<sub>3</sub>): δ 177.6, 140.4, 133.1, 131.2, 129.5, 124.1, 116.8, 108.5, 45.0, 26.7, 26.4, 22.3, 21.3.

**Optical Rotation:**  $[\alpha]_D^{25} = 34.7$  ( $c = 0.72$ , CHCl<sub>3</sub>)

81% ee. Determined by HPLC (Daicel Chiralpak AD-H Column, *n*-Hexane: *i*-PrOH = 90:10, flow rate 1 mL/min, λ = 254 nm):  $t_R = 8.9$  min (major),  $t_R = 8.2$  min (minor).

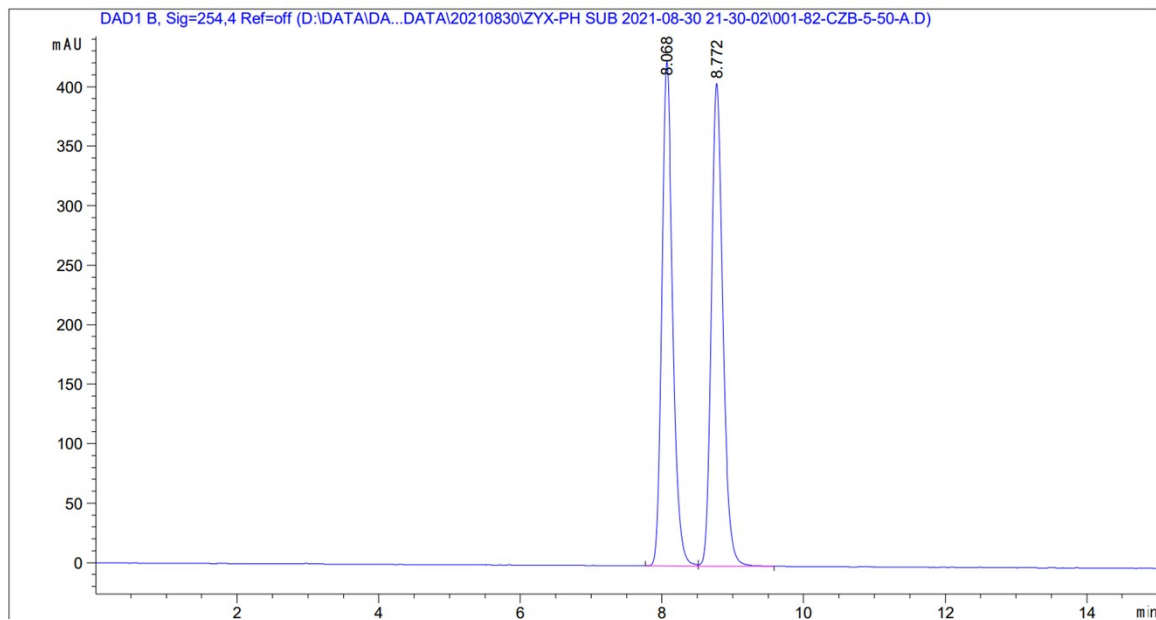

| 峰 # | 保留时间 [min] | 类型 | 峰宽 [min] | 峰面积 [mAU*s] | 峰高 [mAU]  | 峰面积 %   |
|-----|------------|----|----------|-------------|-----------|---------|
| 1   | 8.068      | BV | 0.1626   | 4525.44336  | 423.87772 | 49.9152 |
| 2   | 8.772      | VB | 0.1706   | 4540.82471  | 405.74219 | 50.0848 |

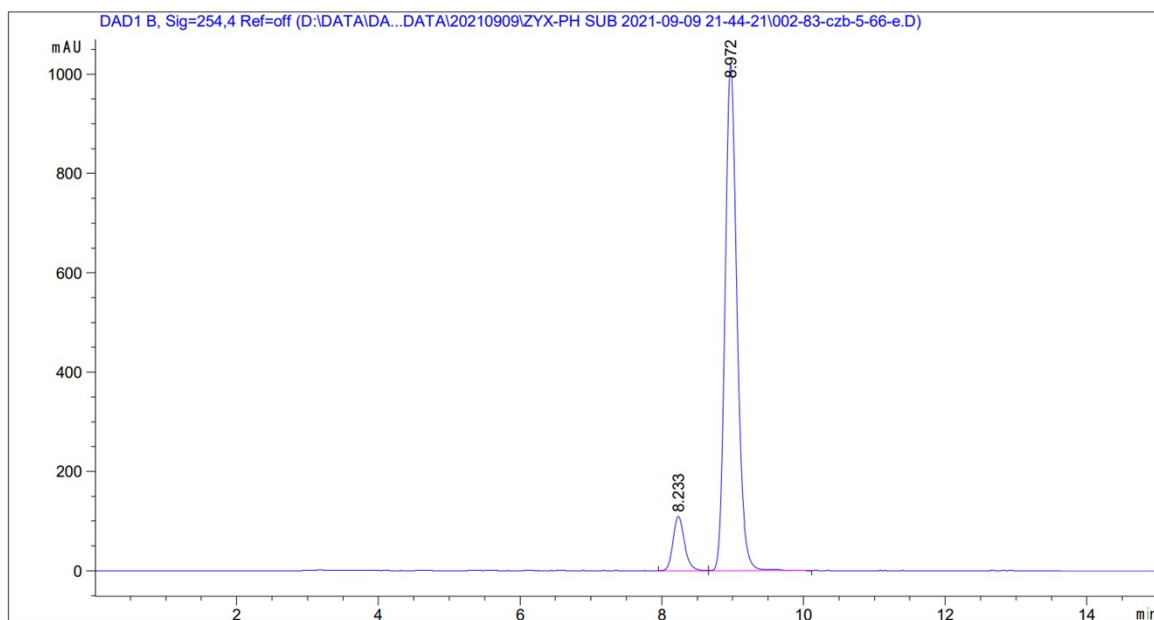

| 峰 # | 保留时间 [min] | 类型   | 峰宽 [min] | 峰面积 [mAU*s] | 峰高 [mAU]   | 峰面积 %   |
|-----|------------|------|----------|-------------|------------|---------|
| 1   | 8.233      | BV   | 0.1706   | 1223.07471  | 109.23093  | 9.4034  |
| 2   | 8.972      | VV R | 0.1763   | 1.17836e4   | 1019.60614 | 90.5966 |

**(S)-2-(5-Ethyl-1,3-dimethyl-2-oxoindolin-3-yl)acetonitrile (2k)**

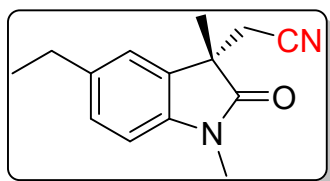

Colorless oil (17.1 mg, 75% yield).

**<sup>1</sup>H NMR (400 MHz, CDCl<sub>3</sub>):** δ 7.32 (s, 1H), 7.17 (d, *J* = 9.0 Hz, 1H), 6.81 (d, *J* = 8.0 Hz, 1H), 3.22 (s, 3H), 2.84 (d, *J* = 16.6 Hz, 1H), 2.66 (q, *J* = 7.6 Hz, 2H), 2.55 (d, *J* = 16.6 Hz, 1H), 1.52 (s, 3H), 1.24 (t, *J* = 7.6 Hz, 3H).

**<sup>13</sup>C NMR (100 MHz, CDCl<sub>3</sub>):** δ 177.6, 140.6, 139.7, 131.2, 128.4, 122.9, 116.8, 108.6, 45.0, 28.7, 26.6 (d, *J* = 19.7 Hz), 22.3, 16.1.

**HRMS (ESI):** *m/z* Calcd for C<sub>14</sub>H<sub>16</sub>N<sub>2</sub>ONa [M+Na]<sup>+</sup> 251.1160; found: *m/z* 251.1167.

**Optical Rotation:** [α]<sub>D</sub><sup>25</sup> = 30.4 (*c* = 0.85, CHCl<sub>3</sub>)

67% ee. Determined by HPLC (Daicel Chiralpak AD-H Column, *n*-Hexane: *i*-PrOH = 90:10, flow rate 0.5 mL/min, λ = 254 nm): *t*<sub>R</sub> = 12.6 min (major), *t*<sub>R</sub> = 12.0 min (minor).



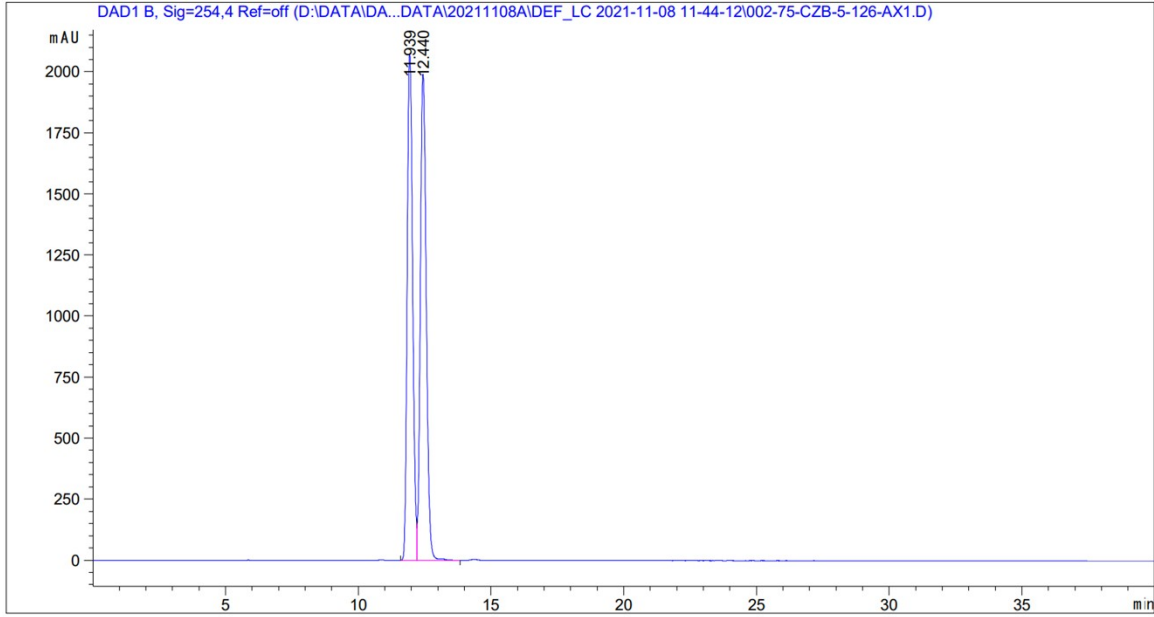

| 峰 # | 保留时间 [min] | 类型   | 峰宽 [min] | 峰面积 [mAU*s] | 峰高 [mAU]   | 峰面积 %   |
|-----|------------|------|----------|-------------|------------|---------|
| 1   | 11.939     | BV   | 0.2250   | 2.96327e4   | 2070.03662 | 48.8739 |
| 2   | 12.440     | VV R | 0.2432   | 3.09982e4   | 1989.98438 | 51.1261 |

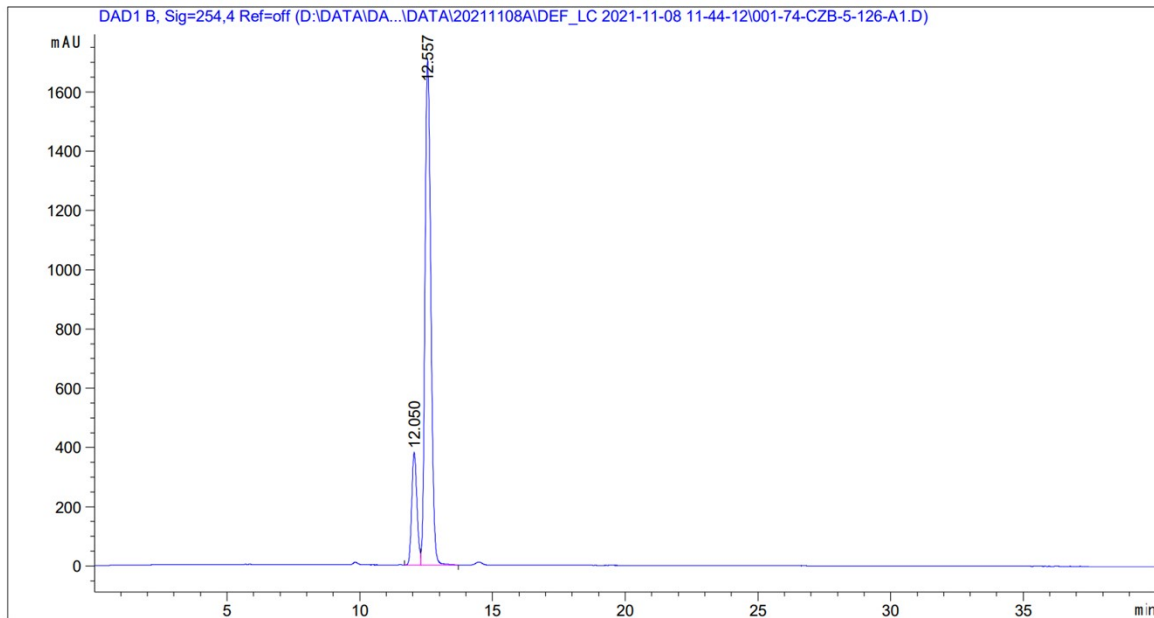

| 峰 # | 保留时间 [min] | 类型 | 峰宽 [min] | 峰面积 [mAU*s] | 峰高 [mAU]   | 峰面积 %   |
|-----|------------|----|----------|-------------|------------|---------|
| 1   | 12.050     | BV | 0.2110   | 5165.07471  | 378.95963  | 16.4504 |
| 2   | 12.557     | VB | 0.2414   | 2.62329e4   | 1706.34558 | 83.5496 |

## Methyl-(*S*)-3-(cyanomethyl)-1,3-dimethyl-2-oxindoline-5-carboxylate (2I)

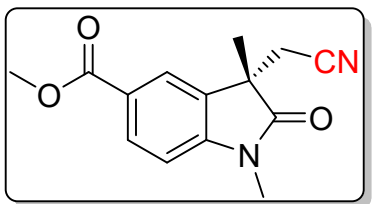

White solid (8.5 mg, 33% yield). Melting point: 139.6 - 142.1 °C.

**<sup>1</sup>H NMR (400 MHz, CDCl<sub>3</sub>):** δ 7.86 (d, *J* = 7.7 Hz, 1H), 7.55 (d, *J* = 8.3 Hz, 2H), 3.95 (s, 3H), 3.29 (s, 3H), 2.88 (d, *J* = 16.7 Hz, 1H), 2.59 (d, *J* = 16.6 Hz, 1H), 1.55 (s, 3H).

**<sup>13</sup>C NMR (100 MHz, CDCl<sub>3</sub>):** δ 177.2, 166.5, 143.2, 136.0, 131.4, 125.1, 123.1, 116.4, 109.5, 52.5, 45.1, 26.8, 26.1, 22.1.

**HRMS (ESI):** *m/z* Calcd for C<sub>14</sub>H<sub>14</sub>N<sub>2</sub>O<sub>3</sub>Na [M+Na]<sup>+</sup> 281.0902; found: *m/z* 281.0911.

**Optical Rotation:** [α]<sub>D</sub><sup>25</sup> = 3.6 (*c* = 0.11, CHCl<sub>3</sub>)

73% ee. Determined by HPLC (Daicel Chiralpak AD-H Column, *n*-Hexane: *i*-PrOH = 90:10, flow rate 1 mL/min, λ = 254 nm): *t*<sub>R</sub> = 15.0 min (major), *t*<sub>R</sub> = 12.2 min (minor).

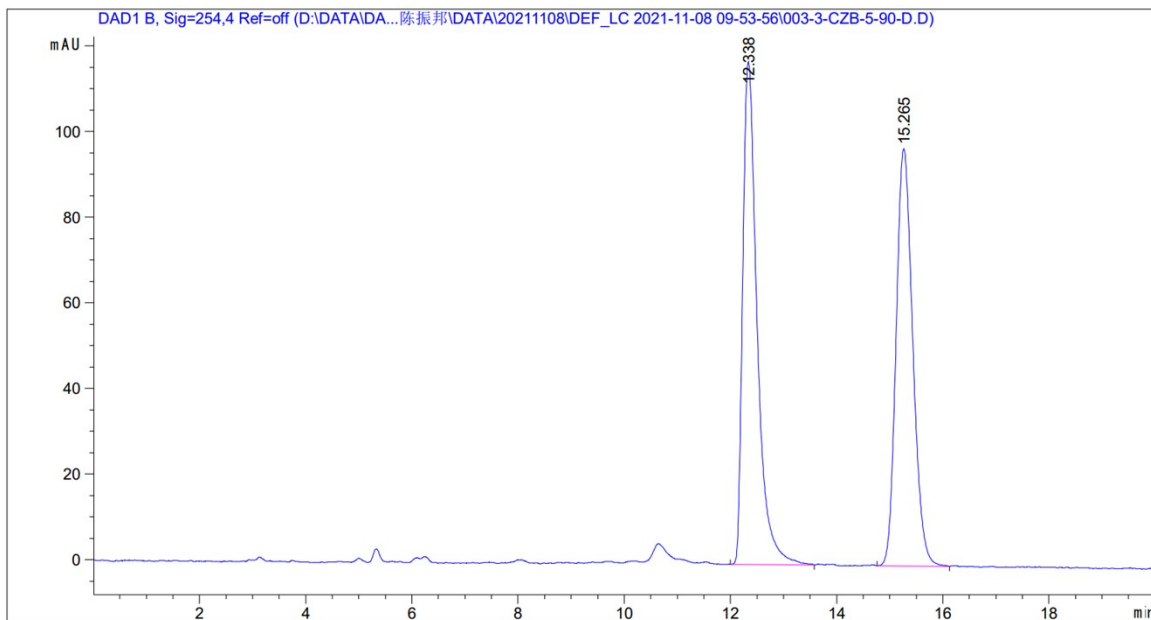

| 峰 # | 保留时间 [min] | 类型 | 峰宽 [min] | 峰面积 [mAU*s] | 峰高 [mAU]  | 峰面积 %   |
|-----|------------|----|----------|-------------|-----------|---------|
| 1   | 12.338     | BB | 0.2873   | 2206.98950  | 117.41142 | 51.0276 |
| 2   | 15.265     | BB | 0.3356   | 2118.10229  | 97.43942  | 48.9724 |

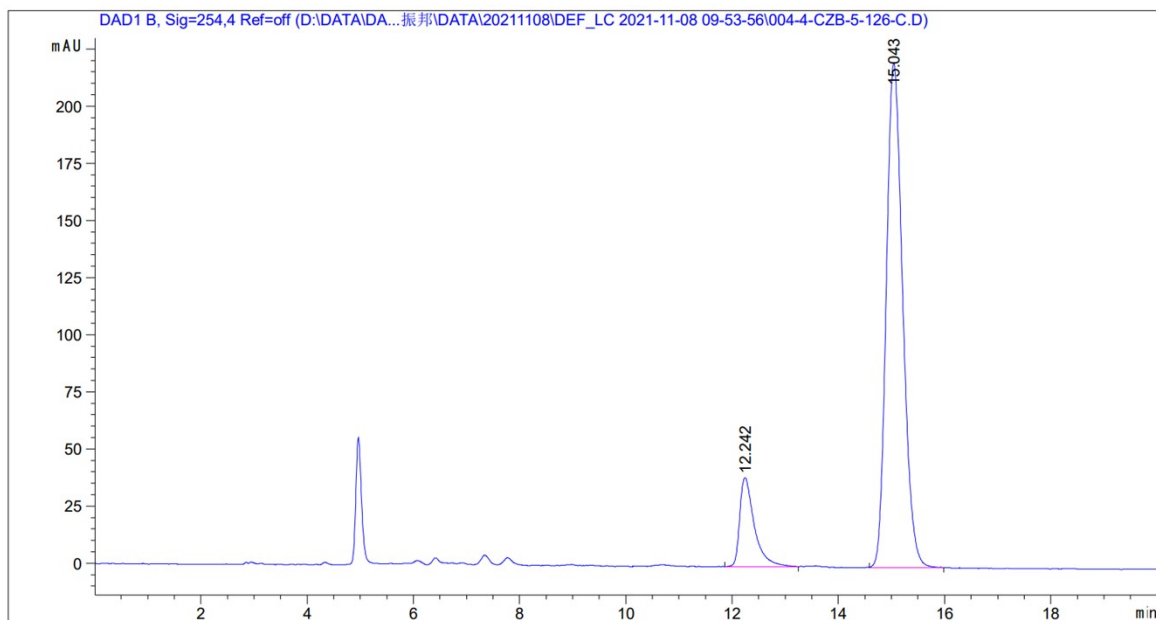

| 峰 # | 保留时间 [min] | 类型 | 峰宽 [min] | 峰面积 [mAU*s] | 峰高 [mAU]  | 峰面积 %   |
|-----|------------|----|----------|-------------|-----------|---------|
| 1   | 12.242     | BB | 0.2843   | 742.07623   | 38.94530  | 13.5675 |
| 2   | 15.043     | BB | 0.3338   | 4727.41895  | 220.74994 | 86.4325 |

**(R)-2-(1-Methyl-2-oxo-1,2,5,6-tetrahydro-4H-pyrrolo[3,2,1-ij]quinolin-1-yl)acetonitrile (2m)<sup>[7]</sup>**

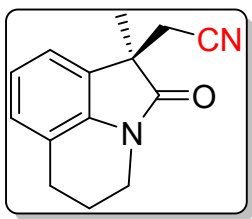

Colorless oil (18.9 mg, 84% yield).

**<sup>1</sup>H NMR (400 MHz, CDCl<sub>3</sub>):** δ 7.30 (d, *J* = 7.4 Hz, 1H), 7.10 (d, *J* = 7.7 Hz, 1H), 7.01 (t, *J* = 7.6 Hz, 1H), 3.73 (td, *J* = 5.4, 2.5 Hz, 2H), 2.82 (dd, *J* = 18.3, 11.4 Hz, 3H), 2.56 (d, *J* = 16.6 Hz, 1H), 2.07 – 1.99 (m, 2H), 1.53 (s, 3H).

**<sup>13</sup>C NMR (100 MHz, CDCl<sub>3</sub>):** δ 176.5, 138.6, 129.8, 128.1, 122.8, 121.0 (d, *J* = 18.2 Hz), 116.9, 46.2, 39.2, 26.3, 24.6, 22.1, 21.2.

**Optical Rotation:**  $[\alpha]_D^{25} = -49.8$  (*c* = 0.52, CHCl<sub>3</sub>)

80 % ee. Determined by HPLC (Daicel Chiralpak AD-H Column, *n*-Hexane: *i*-PrOH = 90:10, flow rate 1 mL/min,  $\lambda = 254$  nm):  $t_R = 11.3$  min (major),  $t_R = 16.0$  min (minor).

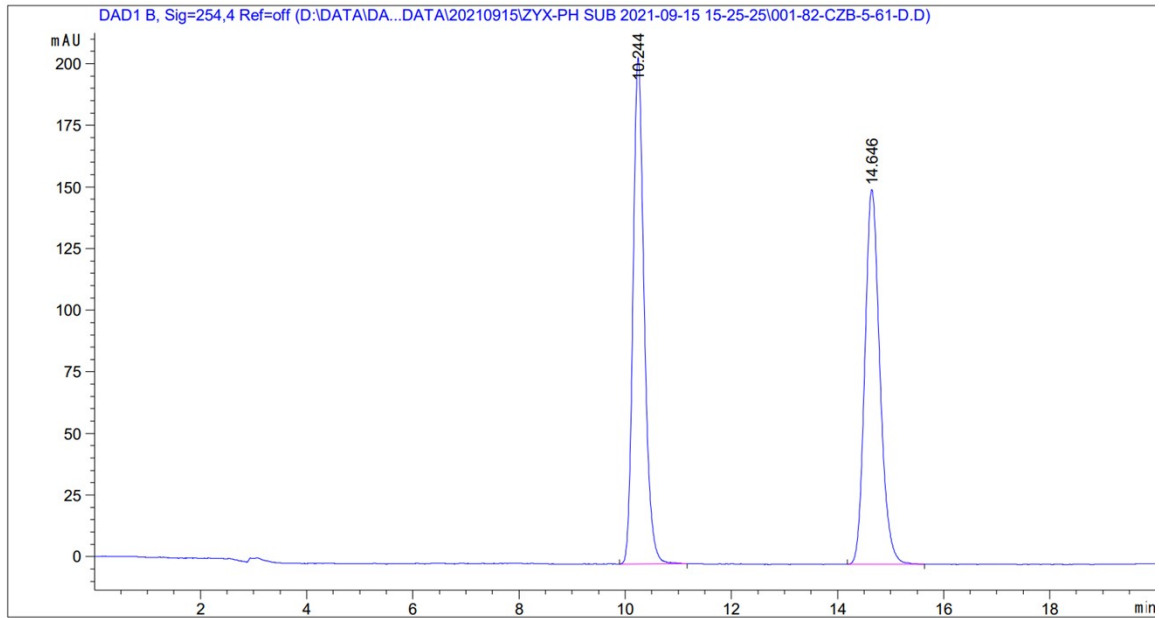

| 峰 # | 保留时间 [min] | 类型 | 峰宽 [min] | 峰面积 [mAU*s] | 峰高 [mAU]  | 峰面积 %   |
|-----|------------|----|----------|-------------|-----------|---------|
| 1   | 10.244     | BB | 0.2223   | 2997.92529  | 205.39369 | 50.0822 |
| 2   | 14.646     | BB | 0.3033   | 2988.08374  | 152.05110 | 49.9178 |

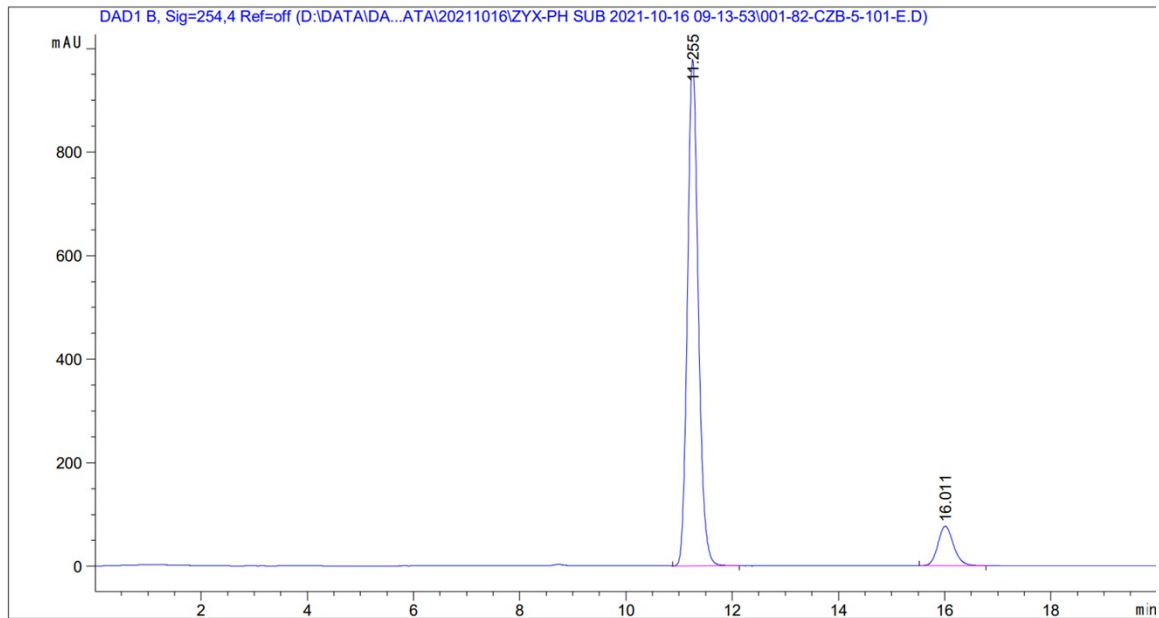

| 峰 # | 保留时间 [min] | 类型 | 峰宽 [min] | 峰面积 [mAU*s] | 峰高 [mAU]  | 峰面积 %   |
|-----|------------|----|----------|-------------|-----------|---------|
| 1   | 11.255     | BB | 0.2174   | 1.38702e4   | 978.58972 | 89.9854 |
| 2   | 16.011     | BB | 0.3142   | 1543.63245  | 76.25620  | 10.0146 |

**(S)-2-(1,3-Dimethyl-2-oxo-2,3-dihydro-1H-benzo[e]indol-1-yl)acetonitrile (2n)**

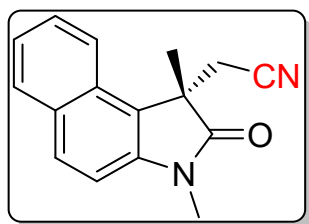

White solid (12.7 mg, 51% yield). Melting point: 129.1 - 131.3 °C.

**<sup>1</sup>H NMR (400 MHz, CDCl<sub>3</sub>):** δ 7.95 (t, *J* = 9.2 Hz, 1H), 7.85 (d, *J* = 8.5 Hz, 1H), 7.61 – 7.56 (m, 1H), 7.43 (t, *J* = 7.6 Hz, 1H), 7.31 – 7.26 (m, 1H), 3.41 (s, 3H), 3.19 (d, *J* = 16.6 Hz, 1H), 3.13 (d, *J* = 16.7 Hz, 1H), 1.75 (s, 3H).

**<sup>13</sup>C NMR (100 MHz, CDCl<sub>3</sub>):** δ 178.8, 141.2, 130.9 (d, *J* = 6.0 Hz), 130.3, 129.2, 128.0, 124.1, 122.1, 121.2, 116.2, 109.9, 47.4, 26.9, 26.2, 22.5.

**HRMS (ESI):** *m/z* Calcd for C<sub>16</sub>H<sub>14</sub>N<sub>2</sub>ONa [M+Na]<sup>+</sup> 273.1004; found: *m/z* 273.1009.

**Optical Rotation:** [α]<sub>D</sub><sup>25</sup> = -2.4 (*c* = 0.65, CHCl<sub>3</sub>)

76 % ee. Determined by HPLC (Daicel Chiralpak AD-H Column, *n*-Hexane: *i*-PrOH = 90:10, flow rate 1 mL/min, λ = 254 nm): *t*<sub>R</sub> = 17.7 min (major), *t*<sub>R</sub> = 15.8 min (minor).

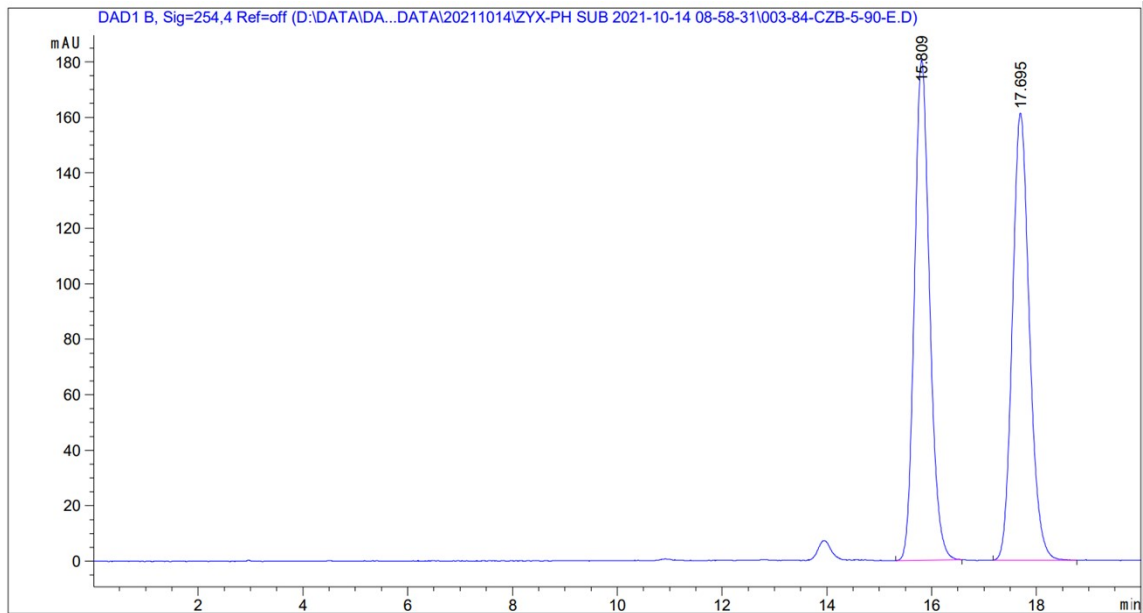

| 峰 # | 保留时间 [min] | 类型 | 峰宽 [min] | 峰面积 [mAU*s] | 峰高 [mAU]  | 峰面积 %   |
|-----|------------|----|----------|-------------|-----------|---------|
| 1   | 15.809     | BB | 0.3089   | 3630.50269  | 180.34590 | 49.9688 |
| 2   | 17.695     | BB | 0.3471   | 3635.03735  | 161.16617 | 50.0312 |

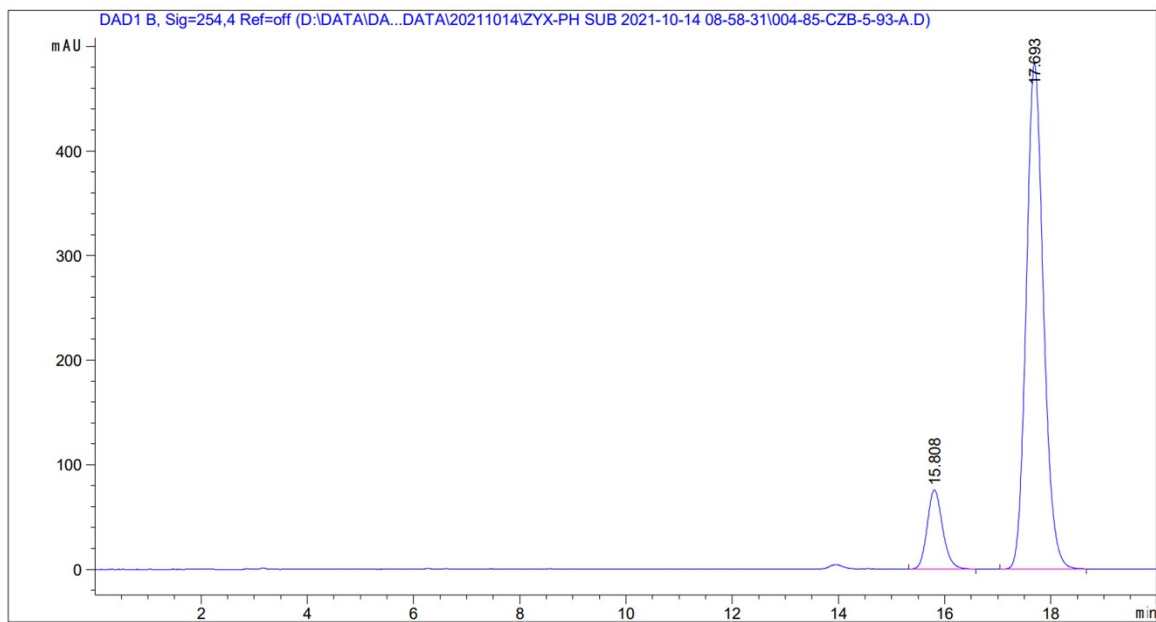

| 峰 # | 保留时间 [min] | 类型 | 峰宽 [min] | 峰面积 [mAU*s] | 峰高 [mAU]  | 峰面积 %   |
|-----|------------|----|----------|-------------|-----------|---------|
| 1   | 15.808     | BB | 0.3086   | 1523.17004  | 75.74116  | 12.2541 |
| 2   | 17.693     | BB | 0.3469   | 1.09068e4   | 483.92142 | 87.7459 |

**(S)-2-(3-Methyl-2-oxoindolin-3-yl)acetonitrile (2o)**<sup>[8]</sup>

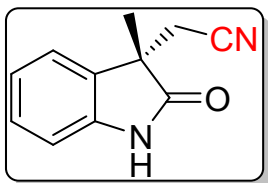

Colorless oil (11.1 mg, 60% yield).

**<sup>1</sup>H NMR (400 MHz, CDCl<sub>3</sub>):** δ 8.52 (s, 1H), 7.45 (d, *J* = 7.5 Hz, 1H), 7.29 (td, *J* = 7.7, 1.1 Hz, 1H), 7.12 (t, *J* = 7.9 Hz, 1H), 6.97 (d, *J* = 7.8 Hz, 1H), 2.85 (d, *J* = 16.6 Hz, 1H), 2.63 (d, *J* = 16.6 Hz, 1H), 1.56 (s, 3H).

**<sup>13</sup>C NMR (100 MHz, CDCl<sub>3</sub>):** δ 179.9, 139.9, 131.6, 129.3, 123.5 (d, *J* = 17.9 Hz), 116.6, 110.60, 45.4, 26.4, 22.3.

**Optical Rotation:**  $[\alpha]_D^{25} = 34.9$  (*c* = 0.38, CHCl<sub>3</sub>)

76 % ee. Determined by HPLC (Daicel Chiralpak AD-H Column, *n*-Hexane: *i*-PrOH = 90:10, flow rate 0.5 mL/min, λ = 254 nm): *t<sub>R</sub>* = 23.4 min (major), *t<sub>R</sub>* = 21.9 min (minor).

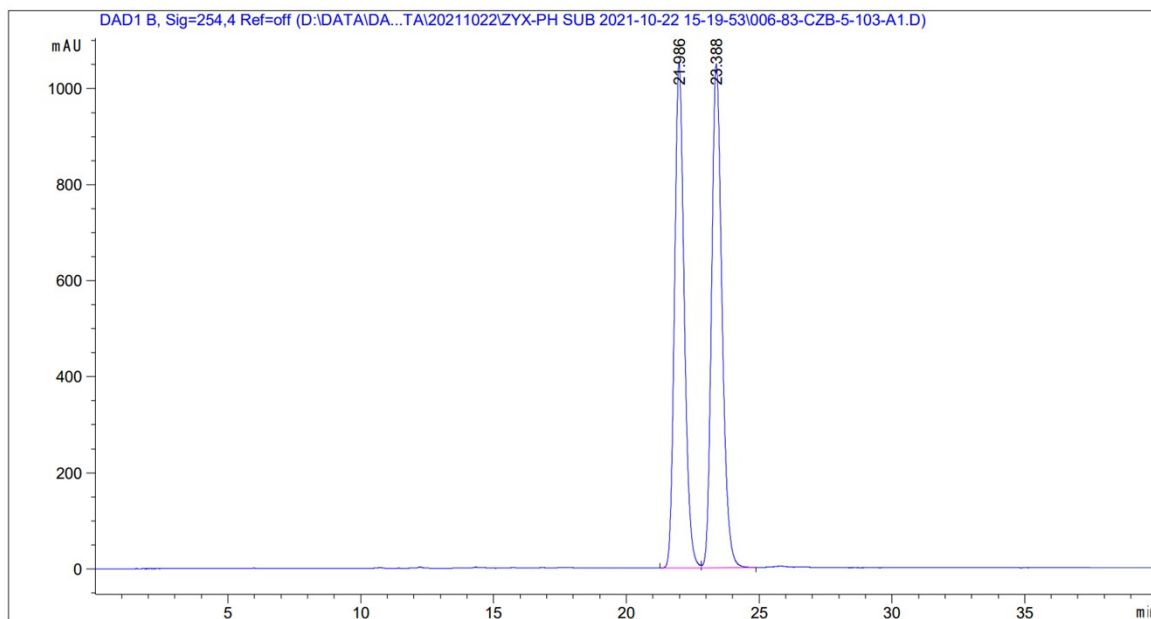

| 峰 # | 保留时间 [min] | 类型 | 峰宽 [min] | 峰面积 [mAU*s] | 峰高 [mAU]   | 峰面积 %   |
|-----|------------|----|----------|-------------|------------|---------|
| 1   | 21.986     | BV | 0.3907   | 2.67330e4   | 1051.24841 | 48.2745 |
| 2   | 23.388     | VB | 0.4185   | 2.86440e4   | 1049.38733 | 51.7255 |

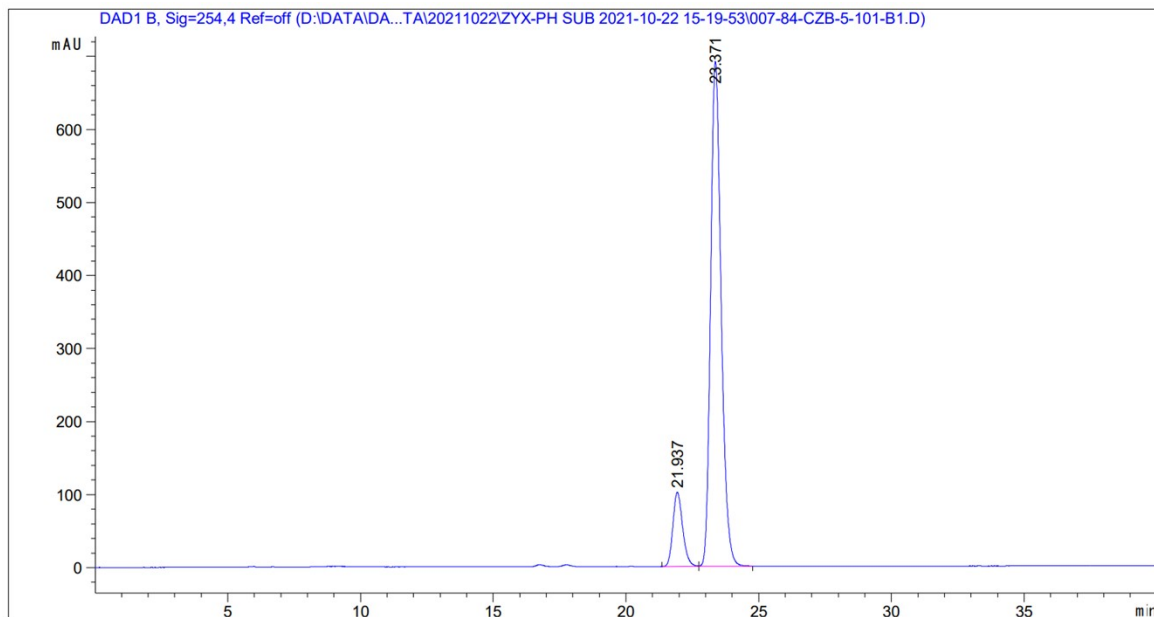

| 峰 # | 保留时间 [min] | 类型 | 峰宽 [min] | 峰面积 [mAU*s] | 峰高 [mAU]  | 峰面积 %   |
|-----|------------|----|----------|-------------|-----------|---------|
| 1   | 21.937     | BV | 0.3928   | 2601.55322  | 101.58399 | 12.0298 |
| 2   | 23.371     | VB | 0.4232   | 1.90244e4   | 691.05615 | 87.9702 |

**(R)-2-(1-Benzyl-3-methyl-2-oxindolin-3-yl)acetonitrile (2p)**<sup>[9]</sup>

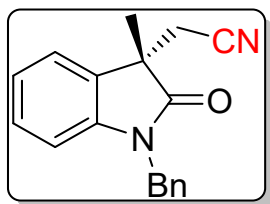

Colorless oil (19.3 mg, 70% yield).

**<sup>1</sup>H NMR (400 MHz, CDCl<sub>3</sub>):** δ 7.48 (d, *J* = 7.4 Hz, 1H), 7.35 – 7.21 (m, 6H), 7.10 (t, *J* = 7.6 Hz, 1H), 6.79 (d, *J* = 7.8 Hz, 1H), 4.94 (s, 2H), 2.91 (d, *J* = 16.6 Hz, 1H), 2.65 (d, *J* = 16.6 Hz, 1H), 1.59 (s, 3H).

**<sup>13</sup>C NMR (100 MHz, CDCl<sub>3</sub>):** δ 177.8, 141.9, 135.4, 131.1, 129.1 (d, *J* = 20.0 Hz), 128.0, 127.3, 123.4 (d, *J* = 11.1 Hz), 116.7, 109.9, 45.1, 44.1, 26.5, 22.7.

**Optical Rotation:**  $[\alpha]_D^{25} = -46.2$  (*c* = 0.61, CHCl<sub>3</sub>). Absolute stereochemistry was determined by comparing the optical rotation value  $[\alpha]_D^{26} = 26.9$  (*c* = 0.90, CHCl<sub>3</sub>), (*S*)-2-(1-Benzyl-3-methyl-2-oxindolin-3-yl)acetonitrile (81% ee) in the literature.<sup>[9]</sup>



90 % ee. Determined by HPLC (Daicel Chiralpak AD-H Column, *n*-Hexane: *i*-PrOH = 90:10, flow rate 0.5 mL/min,  $\lambda = 254$  nm):  $t_R = 26.4$  min (major),  $t_R = 28.1$  min (minor).

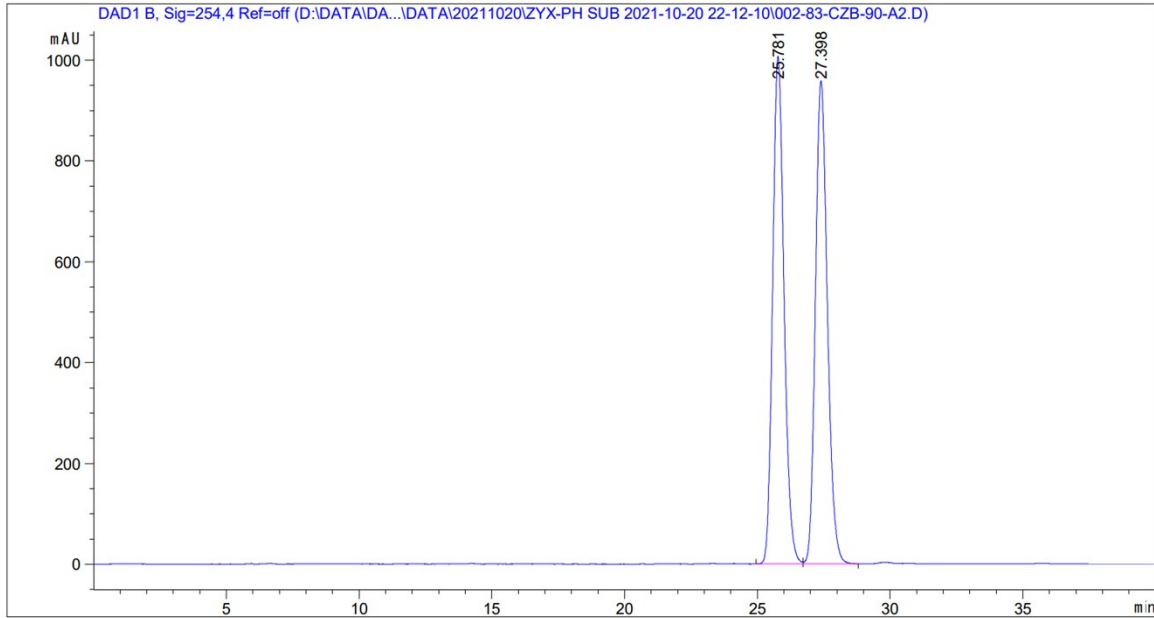

| 峰 # | 保留时间 [min] | 类型 | 峰宽 [min] | 峰面积 [mAU*s] | 峰高 [mAU]   | 峰面积 %   |
|-----|------------|----|----------|-------------|------------|---------|
| 1   | 25.781     | BV | 0.4582   | 2.98693e4   | 1006.58704 | 49.9195 |
| 2   | 27.398     | VB | 0.4830   | 2.99656e4   | 957.87238  | 50.0805 |

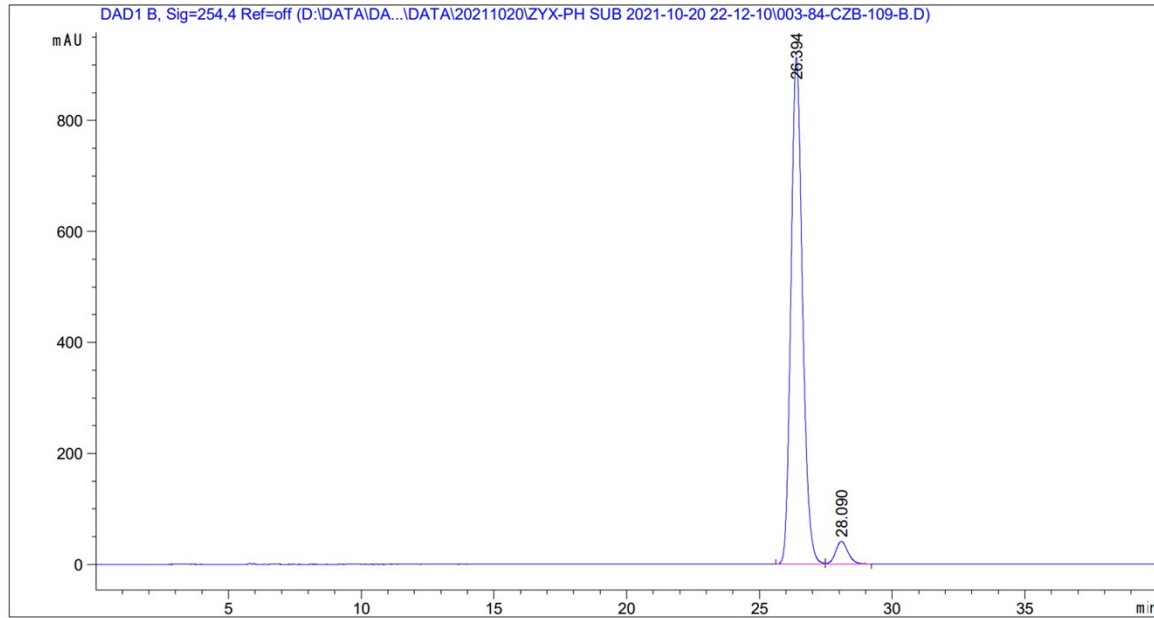

| 峰 # | 保留时间 [min] | 类型 | 峰宽 [min] | 峰面积 [mAU*s] | 峰高 [mAU]  | 峰面积 %   |
|-----|------------|----|----------|-------------|-----------|---------|
| 1   | 26.394     | BV | 0.4662   | 2.75557e4   | 912.75043 | 95.4242 |
| 2   | 28.090     | VB | 0.4848   | 1321.34692  | 40.91438  | 4.5758  |

**(S)-2-(3-Benzyl-1-methyl-2-oxoindolin-3-yl)acetonitrile (2q)<sup>[5]</sup>**

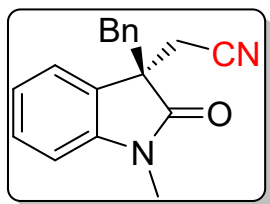

White solid (14.0 mg, 51% yield). Melting point: 85.2 - 86.1 °C.

**<sup>1</sup>H NMR (400 MHz, CDCl<sub>3</sub>):** δ 7.48 (d, *J* = 6.7 Hz, 1H), 7.29 – 7.23 (m, 1H), 7.15 – 7.02 (m, 4H), 6.83 (dd, *J* = 7.9, 1.5 Hz, 2H), 6.64 (d, *J* = 7.8 Hz, 1H), 3.22 (q, *J* = 12.9 Hz, 2H), 3.01 – 2.94 (m, 4H), 2.74 (d, *J* = 16.7 Hz, 1H).

**<sup>13</sup>C NMR (100 MHz, CDCl<sub>3</sub>):** δ 176.3, 143.4, 134.3, 129.9, 129.4, 128.5, 127.9, 127.2, 124.0, 123.0, 116.7, 108.5, 50.6, 42.5, 26.2, 25.2.

**Optical Rotation:**  $[\alpha]_D^{25} = 71.7$  (*c* = 0.62, CHCl<sub>3</sub>)

86 % ee. Determined by HPLC (Daicel Chiralpak AS-H Column, *n*-Hexane: *i*-PrOH = 85:15, flow rate 1 mL/min, λ = 254 nm): *t<sub>R</sub>* = 11.4 min (major), *t<sub>R</sub>* = 15.4 min (minor).

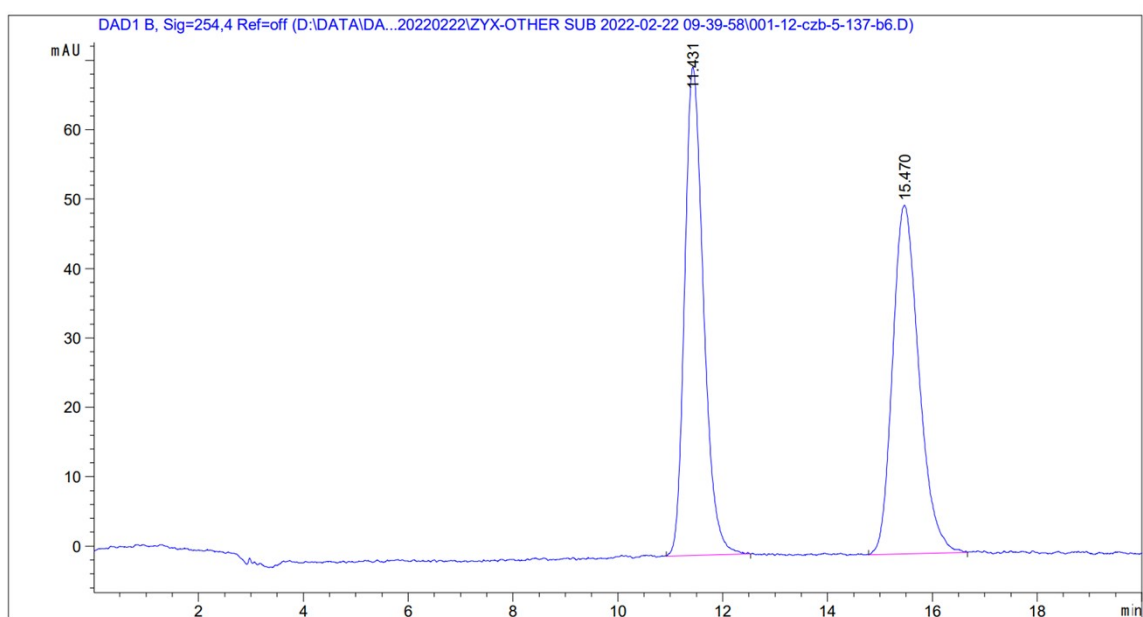

| 峰 # | 保留时间 [min] | 类型   | 峰宽 [min] | 峰面积 [mAU*s] | 峰高 [mAU] | 峰面积 %   |
|-----|------------|------|----------|-------------|----------|---------|
| 1   | 11.431     | BV R | 0.3778   | 1759.45776  | 70.35056 | 50.1338 |
| 2   | 15.470     | BV R | 0.5246   | 1750.06396  | 50.21130 | 49.8662 |

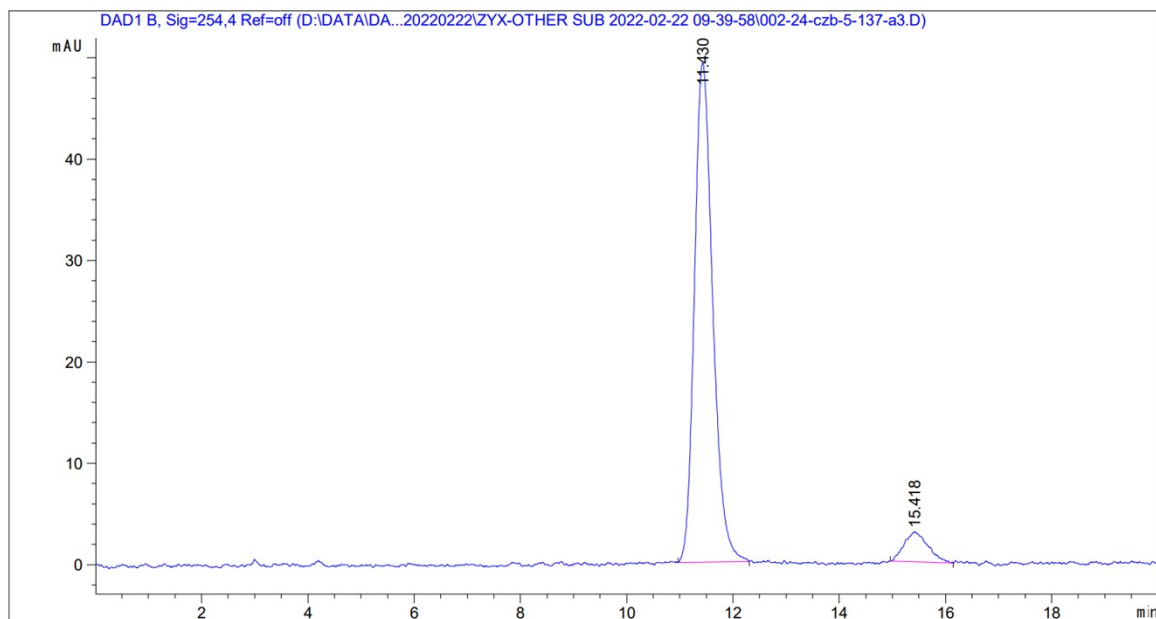

| 峰 # | 保留时间 [min] | 类型 | 峰宽 [min] | 峰面积 [mAU*s] | 峰高 [mAU] | 峰面积 %   |
|-----|------------|----|----------|-------------|----------|---------|
| 1   | 11.430     | BB | 0.3632   | 1177.63440  | 49.21714 | 92.8351 |
| 2   | 15.418     | BB | 0.3850   | 90.88804    | 2.93749  | 7.1649  |

**(S)-2-(1-Methyl-2-oxo-3-phenylindolin-3-yl)acetonitrile (2r)<sup>[5]</sup>**

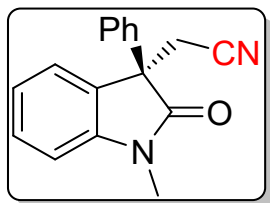

Colorless oil (13.6 mg, 52% yield).

<sup>1</sup>H NMR (400 MHz, CDCl<sub>3</sub>): δ 7.53 (d, *J* = 7.4 Hz, 1H), 7.45 (t, *J* = 7.8 Hz, 1H), 7.37 – 7.31 (m, 5H), 7.22 (t, *J* = 7.5 Hz, 1H), 6.98 (d, *J* = 7.8 Hz, 1H), 3.39 (d, *J* = 16.6 Hz, 1H), 3.24 (s, 3H), 3.05 (d, *J* = 16.6 Hz, 1H).

$^{13}\text{C}$  NMR (100 MHz,  $\text{CDCl}_3$ ):  $\delta$  175.8, 143.7, 136.6, 129.8, 129.5, 129.1, 128.5, 126.9, 125.4, 123.5, 116.6, 109.1, 52.8, 26.9, 26.5.

**Optical Rotation:**  $[\alpha]_{\text{D}}^{25} = 53.0$  ( $c = 0.65$ ,  $\text{CHCl}_3$ )

37 % ee. Determined by HPLC (Daicel Chiralpak AD-H Column, *n*-Hexane: *i*-PrOH = 90:10, flow rate 1 mL/min,  $\lambda = 254$  nm):  $t_{\text{R}} = 20.0$  min (major),  $t_{\text{R}} = 12.3$  min (minor).

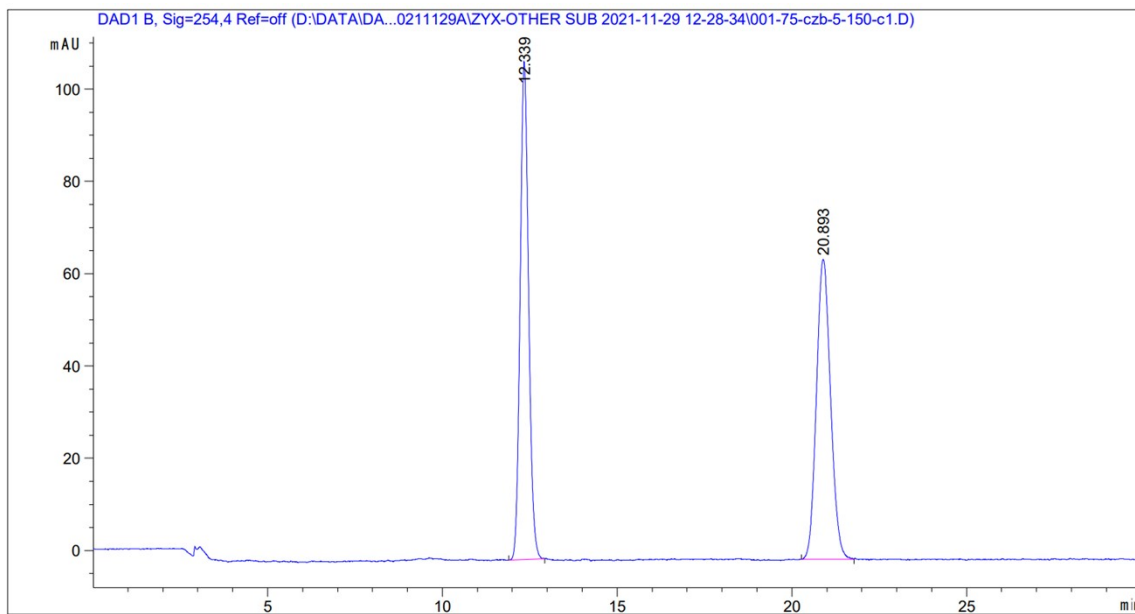

| 峰 # | 保留时间 [min] | 类型 | 峰宽 [min] | 峰面积 [mAU*s] | 峰高 [mAU]  | 峰面积 %   |
|-----|------------|----|----------|-------------|-----------|---------|
| 1   | 12.339     | BB | 0.2610   | 1822.18066  | 107.90031 | 49.9566 |
| 2   | 20.893     | BB | 0.4316   | 1825.34521  | 64.99825  | 50.0434 |

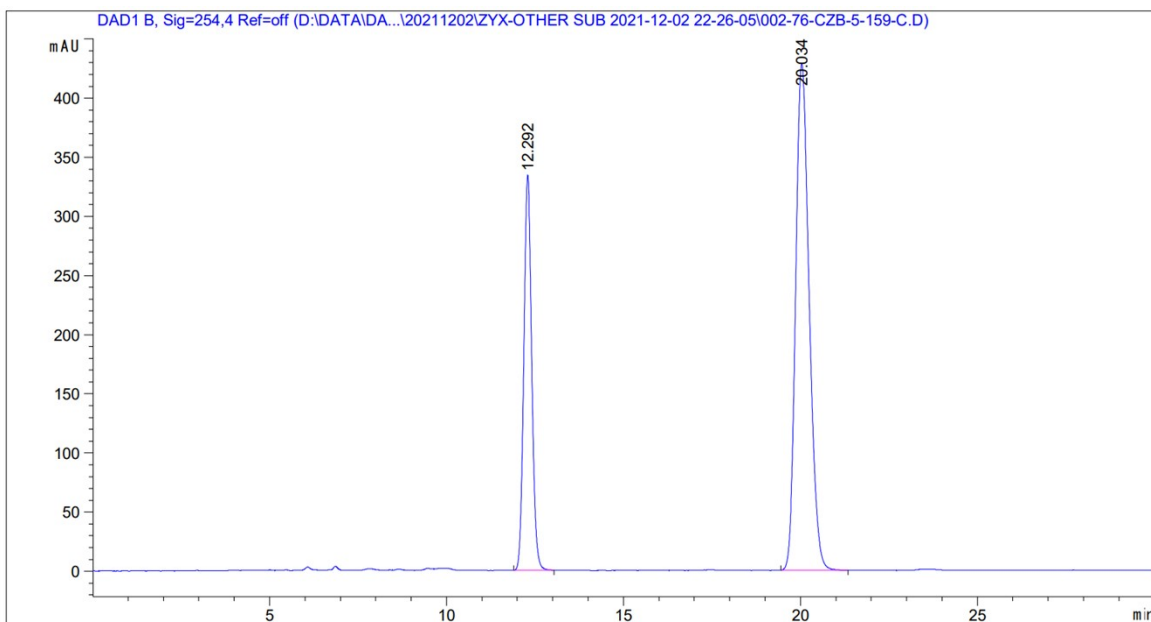

| 峰 # | 保留时间 [min] | 类型 | 峰宽 [min] | 峰面积 [mAU*s] | 峰高 [mAU]  | 峰面积 %   |
|-----|------------|----|----------|-------------|-----------|---------|
| 1   | 12.292     | BB | 0.2420   | 5214.84619  | 334.33200 | 31.4748 |
| 2   | 20.034     | BB | 0.4132   | 1.13535e4   | 428.42776 | 68.5252 |

**(S)-2-(3-Ethyl-1-methyl-2-oxindolin-3-yl)acetonitrile (2s)**<sup>[10]</sup>

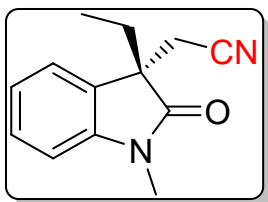

Colorless oil (15.2 mg, 71% yield).

**<sup>1</sup>H NMR (400 MHz, CDCl<sub>3</sub>):** δ 7.42 (dd, *J* = 7.4, 0.6 Hz, 1H), 7.36 (td, *J* = 7.8, 1.2 Hz, 1H), 7.15 (td, *J* = 7.6, 0.9 Hz, 1H), 6.90 (d, *J* = 7.8 Hz, 1H), 3.24 (s, 3H), 2.84 (d, *J* = 16.6 Hz, 1H), 2.59 (d, *J* = 16.6 Hz, 1H), 2.02 (q, *J* = 7.4 Hz, 2H), 0.61 (t, *J* = 7.4 Hz, 3H).

**<sup>13</sup>C NMR (100 MHz, CDCl<sub>3</sub>):** δ 177.0, 143.7, 129.2 (d, *J* = 18.7 Hz), 123.4 (d, *J* = 1.5 Hz), 116.7, 108.6, 49.7, 29.5, 26.5, 25.8, 8.5.

**Optical Rotation:**  $[\alpha]_{\text{D}}^{25} = 7.6$  (*c* = 0.11, CHCl<sub>3</sub>)

76 % ee. Determined by HPLC (Daicel Chiralpak AD-H Column, *n*-Hexane: *i*-PrOH = 90:10, flow rate 1 mL/min, λ = 254 nm): *t<sub>R</sub>* = 8.1 min (major), *t<sub>R</sub>* = 7.1 min (minor).

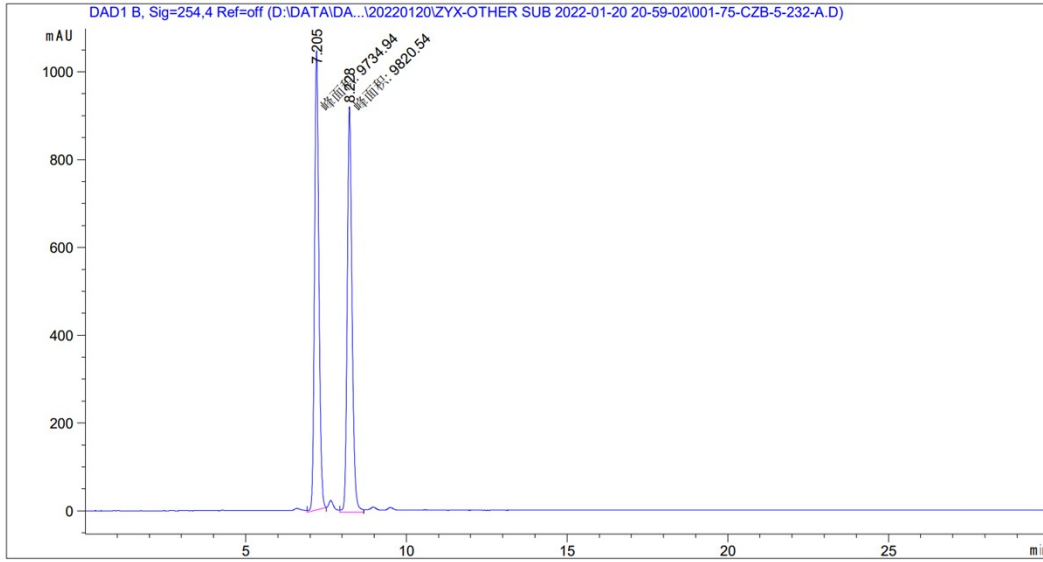

| 峰 # | 保留时间 [min] | 类型 | 峰宽 [min] | 峰面积 [mAU*s] | 峰高 [mAU]   | 峰面积 %   |
|-----|------------|----|----------|-------------|------------|---------|
| 1   | 7.205      | MM | 0.1552   | 9734.93945  | 1045.14209 | 49.7811 |
| 2   | 8.228      | MM | 0.1771   | 9820.54297  | 924.11456  | 50.2189 |

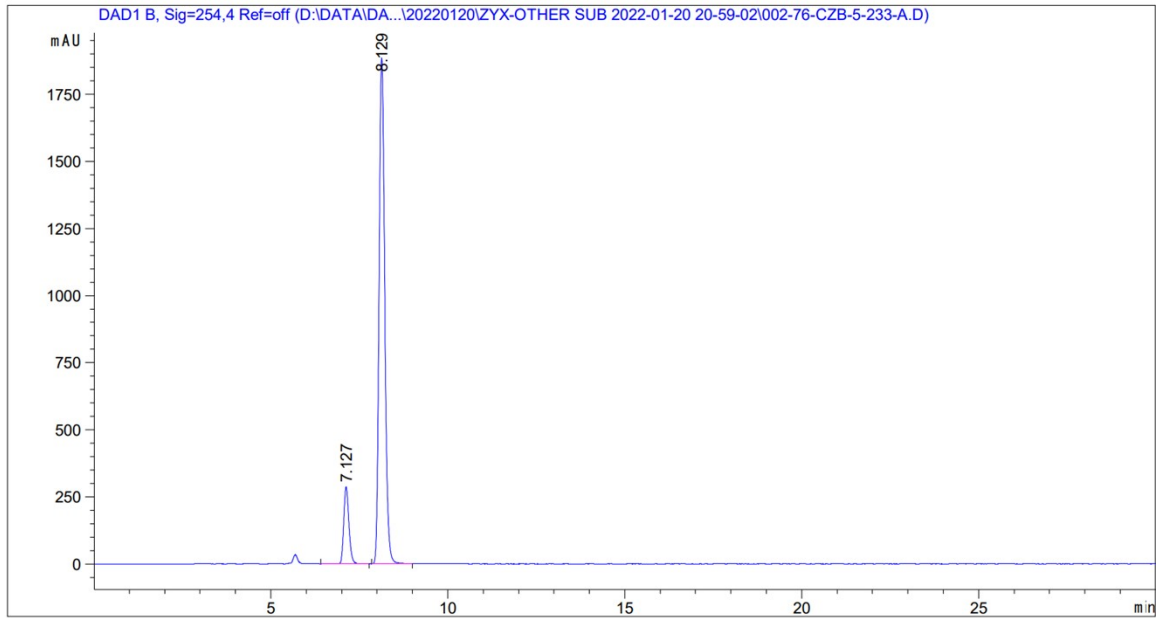

| 峰 # | 保留时间 [min] | 类型   | 峰宽 [min] | 峰面积 [mAU*s] | 峰高 [mAU]   | 峰面积 %   |
|-----|------------|------|----------|-------------|------------|---------|
| 1   | 7.127      | VB R | 0.1524   | 2895.21973  | 287.80273  | 12.0953 |
| 2   | 8.129      | BB   | 0.1741   | 2.10416e4   | 1886.67126 | 87.9047 |

## 2-(3-Isopropyl-1-methyl-2-oxindolin-3-yl)acetonitrile (2t)<sup>[6]</sup>

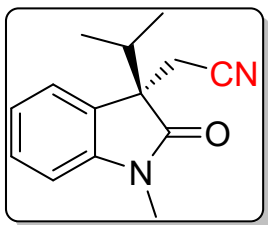

Colorless oil (10.0 mg, 44% yield).

**<sup>1</sup>H NMR (400 MHz, CDCl<sub>3</sub>):**  $\delta$  7.36 (ddd,  $J = 8.8, 5.6, 1.7$  Hz, 2H), 7.12 (td,  $J = 7.7, 0.8$  Hz, 1H), 6.89 (d,  $J = 7.8$  Hz, 1H), 3.23 (s, 3H), 2.94 (d,  $J = 16.6$  Hz, 1H), 2.68 (d,  $J = 16.6$  Hz, 1H), 2.40 – 2.27 (m, 1H), 0.93 (d,  $J = 6.8$  Hz, 3H), 0.88 (d,  $J = 6.9$  Hz, 3H).

**<sup>13</sup>C NMR (100 MHz, CDCl<sub>3</sub>):**  $\delta$  176.8, 143.9, 129.1 (d,  $J = 16.1$  Hz), 123.6, 123.1, 116.8, 108.5, 52.3, 34.5, 26.4, 24.0, 17.2, 17.0.

2 % ee. Determined by HPLC (Daicel Chiralpak AD-H Column, *n*-Hexane: *i*-PrOH = 90:10, flow rate 1 mL/min,  $\lambda = 254$  nm):  $t_R = 7.5$  min (major),  $t_R = 6.9$  min (minor).

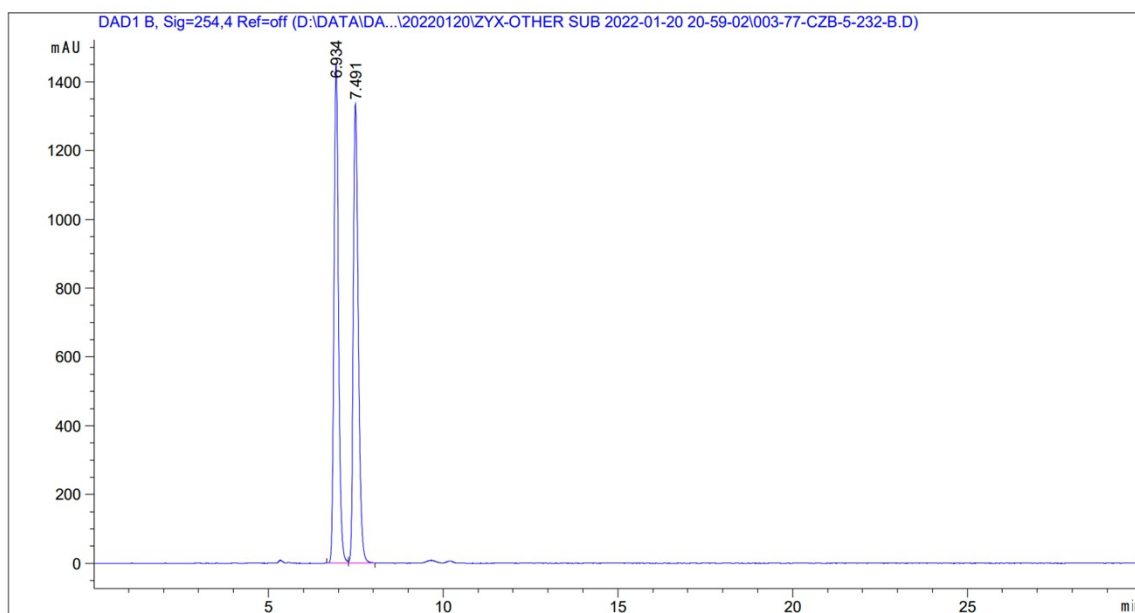

| 峰 # | 保留时间 [min] | 类型 | 峰宽 [min] | 峰面积 [mAU*s] | 峰高 [mAU]   | 峰面积 %   |
|-----|------------|----|----------|-------------|------------|---------|
| 1   | 6.934      | BV | 0.1402   | 1.32053e4   | 1450.17297 | 49.8958 |
| 2   | 7.491      | VB | 0.1540   | 1.32605e4   | 1333.68420 | 50.1042 |

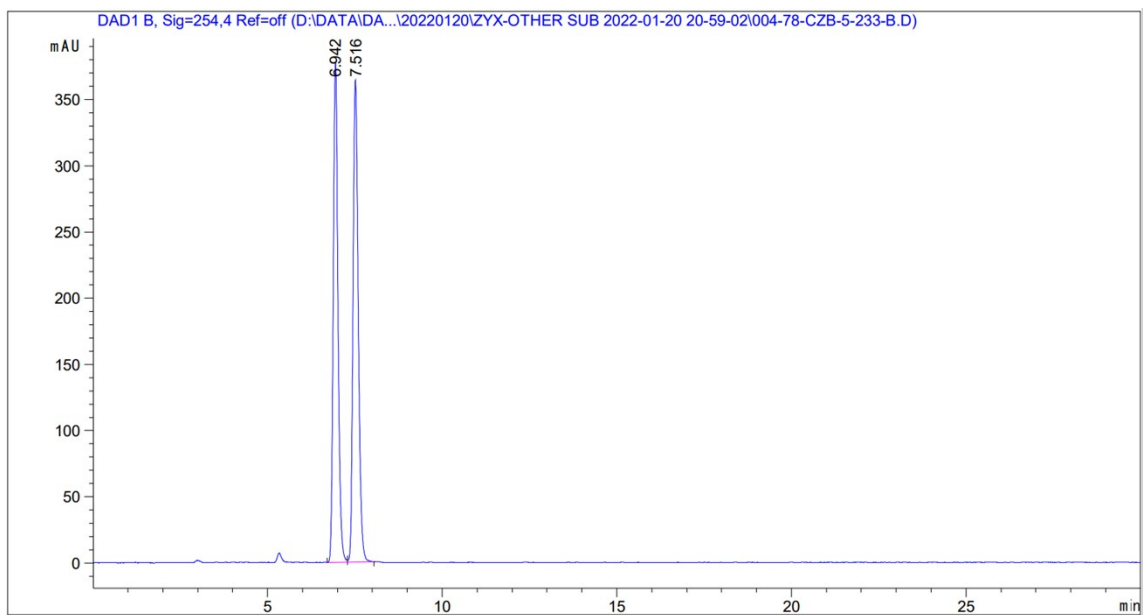

| 峰 # | 保留时间 [min] | 类型 | 峰宽 [min] | 峰面积 [mAU*s] | 峰高 [mAU]  | 峰面积 %   |
|-----|------------|----|----------|-------------|-----------|---------|
| 1   | 6.942      | BV | 0.1472   | 3595.28125  | 377.36691 | 48.9742 |
| 2   | 7.516      | VB | 0.1580   | 3745.89282  | 364.13153 | 51.0258 |



## 6、 Experimental Procedures and Characterization Data for Derivatization Studies

### Ethyl (*S, E*)-3-amino-4-(1,3-dimethyl-2-oxoindolin-3-yl)but-2-enoate (**5**)

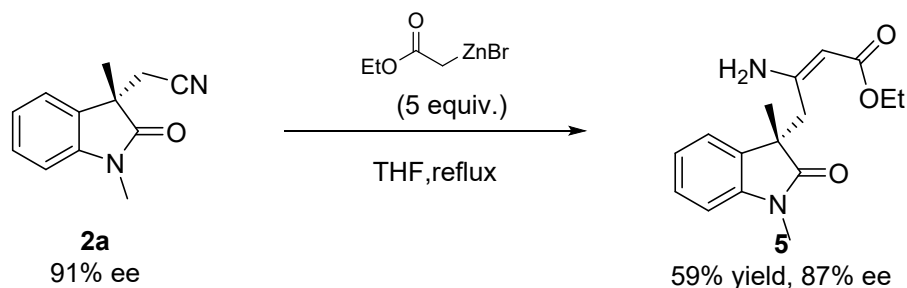

To a suspension of activated zinc powder (50 mg, 0.75 mmol, 5.0 equiv) in THF (0.5 mL) at reflux (70 °C), 2 drops of ethyl 2-bromoacetate was added. After the observation of a pale green colour, **2a** (30 mg, 0.15 mmol, 1.0 equiv) dissolved in THF(0.5 mL) was added in one portion into the above mixture. The remaining ethyl 2-bromoacetate (125  $\mu$ L, 0.75 mmol, 5.0 equiv) was added dropwise over 30 minutes and the mixture was stirred at 70 °C for 3 hours. After the reaction finished (monitored by TLC), the mixture was diluted with 2 mL of THF and quenched with 50% aqueous K<sub>2</sub>CO<sub>3</sub>. The resulting biphasic mixture was stirred overnight to allow separation. The resulting organic phase was transferred to a separate container. The remaining yellow residue was thoroughly rinsed with additional THF (3 x 2 mL) and the combined organic layers were sequentially dried over MgSO<sub>4</sub>, filtered and concentrated in vacuo. The remaining residue was purified by column chromatography on silica gel (petroleum ether/EtOAc) to yield product **5** as a yellow oil (24.4 mg, yield: 59%).

**<sup>1</sup>H NMR (400 MHz, CDCl<sub>3</sub>):**  $\delta$  7.66 (s, 1H), 7.29 (t,  $J$  = 7.4 Hz, 1H), 7.21 (d,  $J$  = 7.2 Hz, 1H), 7.10 (t,  $J$  = 7.5 Hz, 1H), 6.86 (d,  $J$  = 7.8 Hz, 1H), 5.20 (s, 1H), 4.34 (s, 1H), 4.08 – 3.93 (m, 2H), 3.22 (s, 3H), 2.66 (d,  $J$  = 13.8 Hz, 1H), 2.56 (d,  $J$  = 13.8 Hz, 1H), 1.43 (s, 3H), 1.21 (t,  $J$  = 7.1 Hz, 3H).

**<sup>13</sup>C NMR (100 MHz, CDCl<sub>3</sub>):**  $\delta$  180.5, 170.1, 158.7, 143.0, 132.9, 128.4, 123.0, 122.8, 108.6, 86.1, 58.6, 48.1, 43.6, 26.5, 24.0, 14.6.

**HRMS (ESI):**  $m/z$  Calcd for C<sub>16</sub>H<sub>20</sub>N<sub>2</sub>NaO<sub>3</sub> [M+Na<sup>+</sup>]: 311.1366; found 311.1368.

**Optical Rotation:**  $[\alpha]_D^{25}$  = 34.1 ( $c$  = 0.27, CHCl<sub>3</sub>)

87 % ee. Determined by HPLC (Daicel Chiralpak AD-H Column, *n*-Hexane: *i*-PrOH = 80:20, flow rate 0.8 mL/min,  $\lambda = 254$  nm):  $t_R = 9.0$  min (major),  $t_R = 10.4$  min (minor)

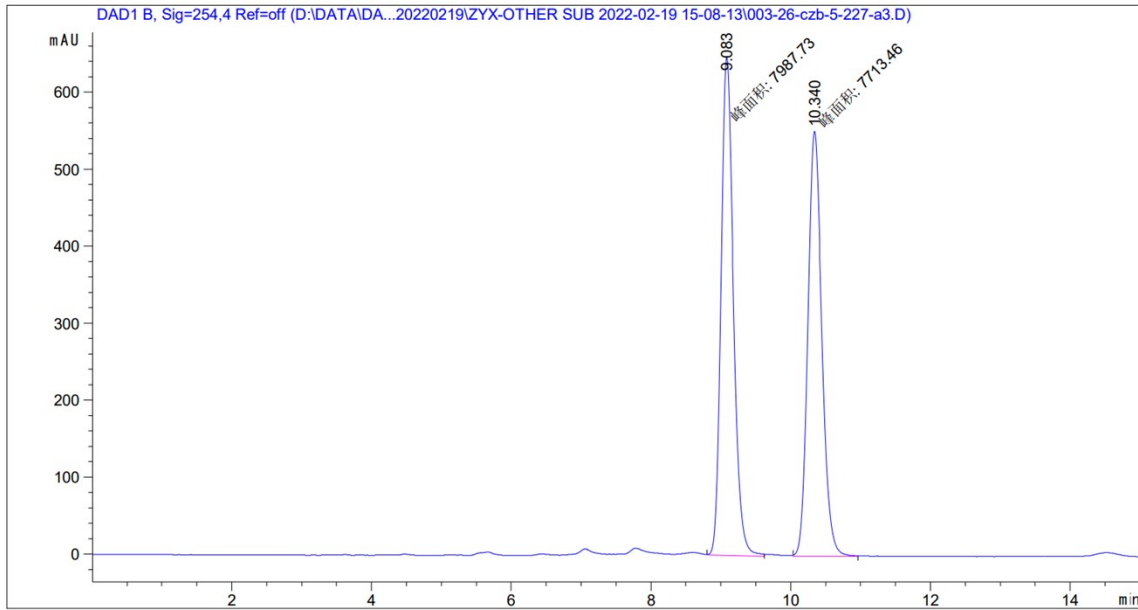

| 峰 # | 保留时间 [min] | 类型 | 峰宽 [min] | 峰面积 [mAU*s] | 峰高 [mAU]  | 峰面积 %   |
|-----|------------|----|----------|-------------|-----------|---------|
| 1   | 9.083      | MM | 0.2055   | 7987.73096  | 647.72748 | 50.8734 |
| 2   | 10.340     | MM | 0.2326   | 7713.45996  | 552.69556 | 49.1266 |

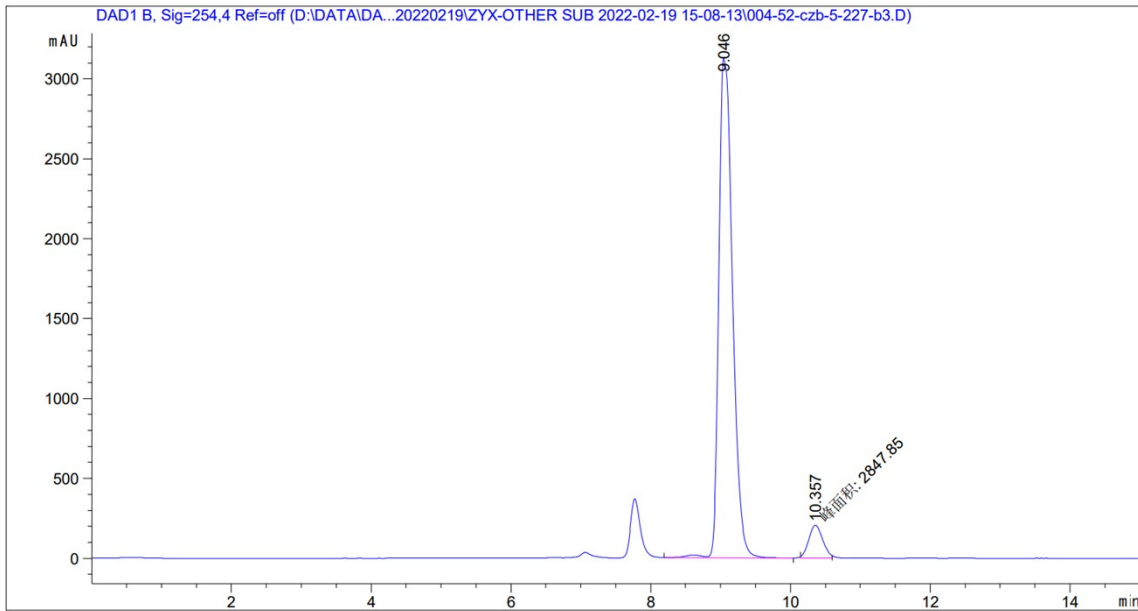

| 峰 # | 保留时间 [min] | 类型   | 峰宽 [min] | 峰面积 [mAU*s] | 峰高 [mAU]   | 峰面积 %   |
|-----|------------|------|----------|-------------|------------|---------|
| 1   | 9.046      | VB R | 0.1783   | 4.21633e4   | 3127.20288 | 93.6730 |
| 2   | 10.357     | MM   | 0.2297   | 2847.84692  | 206.60307  | 6.3270  |

**(S)-2-(1,3-Dimethylindolin-3-yl)ethan-1-amine (6)**

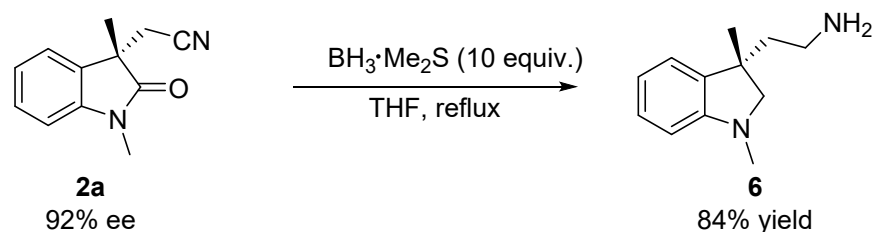

The mixture of **2a** (30 mg, 0.15 mmol, 1.0 equiv) and  $\text{BH}_3 \cdot \text{Me}_2\text{S}$  (1.5 mL, 1.0 M, 1.5 mmol, 10 equiv) in THF (1 mL) was heated at 70 °C for 12 hours. After the reaction was completed (monitored by TLC), the mixture was quenched with MeOH, and concentrated in vacuo. The remaining residue was purified by column chromatography on silica gel (DCM/MeOH) to yield product **6** as a yellow oil (24 mg, yield: 84%).

**$^1\text{H}$  NMR (400 MHz,  $\text{CDCl}_3$ ):**  $\delta$  7.10 (t,  $J = 7.6$  Hz, 1H), 6.98 (d,  $J = 7.2$  Hz, 1H), 6.70 (t,  $J = 7.3$  Hz, 1H), 6.48 (d,  $J = 7.8$  Hz, 1H), 3.23 (d,  $J = 8.7$  Hz, 1H), 2.98 (d,  $J = 8.7$  Hz, 1H), 2.79 – 2.69 (m, 4H), 2.68 – 2.57 (m, 1H), 1.87 – 1.79 (m, 1H), 1.75 – 1.67 (m, 3H), 1.30 (s, 3H).

**$^{13}\text{C}$  NMR (100 MHz,  $\text{CDCl}_3$ ):**  $\delta$  152.4, 137.6, 127.8, 122.3, 117.9, 107.5, 68.5, 44.7, 43.0, 38.6, 36.1, 25.9.

**HRMS (ESI):**  $m/z$  Calcd for  $\text{C}_{12}\text{H}_{19}\text{N}_2$   $[\text{M}+\text{H}]$ : 191.1543; found 191.1543.

Optical Rotation:  $[\alpha]_{\text{D}}^{25} = 19.0$  ( $c = 0.31$ ,  $\text{CHCl}_3$ )

**(S)-3-((4,5-Dihydrooxazol-2-yl)methyl)-1,3-dimethylindolin-2-one (7)**

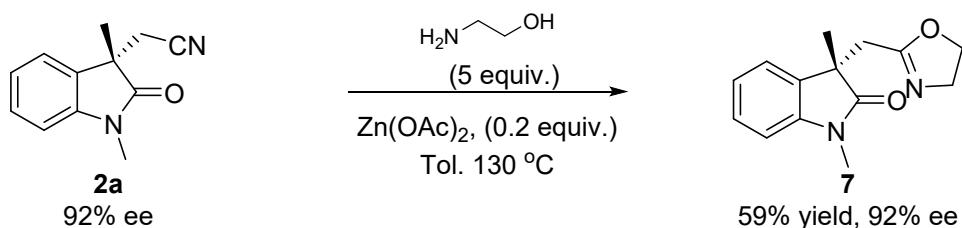

The mixture of **2a** (30 mg, 0.15 mmol, 1.0 equiv), 2-aminoethan-1-ol (45.8 mg, 0.75 mmol, 5.0 equiv), and Zn(OAc)<sub>2</sub> (6 mg, 0.03 mmol, 20 mol%) in Tol. (1 mL) was heated at 130 °C for 48 hours. After the reaction was completed (monitored by TLC), the mixture was concentrated in vacuo. The remaining residue was purified by column chromatography on silica gel (petroleum ether/EtOAc) to yield product **7** as a yellow oil (21.6 mg, yield: 59%).

**<sup>1</sup>H NMR (400 MHz, CDCl<sub>3</sub>):** δ 7.33 – 7.21 (m, 2H), 7.05 (t, *J* = 7.5 Hz, 1H), 6.84 (d, *J* = 7.7 Hz, 1H), 4.04 (dd, *J* = 18.0, 8.4 Hz, 1H), 3.82 (dd, *J* = 18.7, 8.6 Hz, 1H), 3.57 (td, *J* = 9.4, 4.9 Hz, 2H), 3.24 (s, 3H), 2.86 (q, *J* = 14.8 Hz, 2H), 1.44 (s, 3H).

**<sup>13</sup>C NMR (100 MHz, CDCl<sub>3</sub>):** δ 180.0, 164.5, 143.4, 132.6, 128.1, 123.1, 122.4, 108.0, 67.4, 54.3, 46.4, 35.8, 26.5, 24.2.

**HRMS (ESI):** *m/z* Calcd for C<sub>16</sub>H<sub>19</sub>N<sub>3</sub>O<sub>2</sub> [M+CH<sub>3</sub>CN]<sup>+</sup> 285.1477; found: *m/z* 285.1430.

**Optical Rotation:** [α]<sub>D</sub><sup>25</sup> = 1.5 (*c* = 0.41, CHCl<sub>3</sub>)

92 % ee. Determined by HPLC (Daicel Chiralpak AD-H Column, *n*-Hexane: *i*-PrOH = 80:20, flow rate 0.8 mL/min, λ = 254 nm): *t*<sub>R</sub> = 8.2 min (major), *t*<sub>R</sub> = 10.4 min (minor).

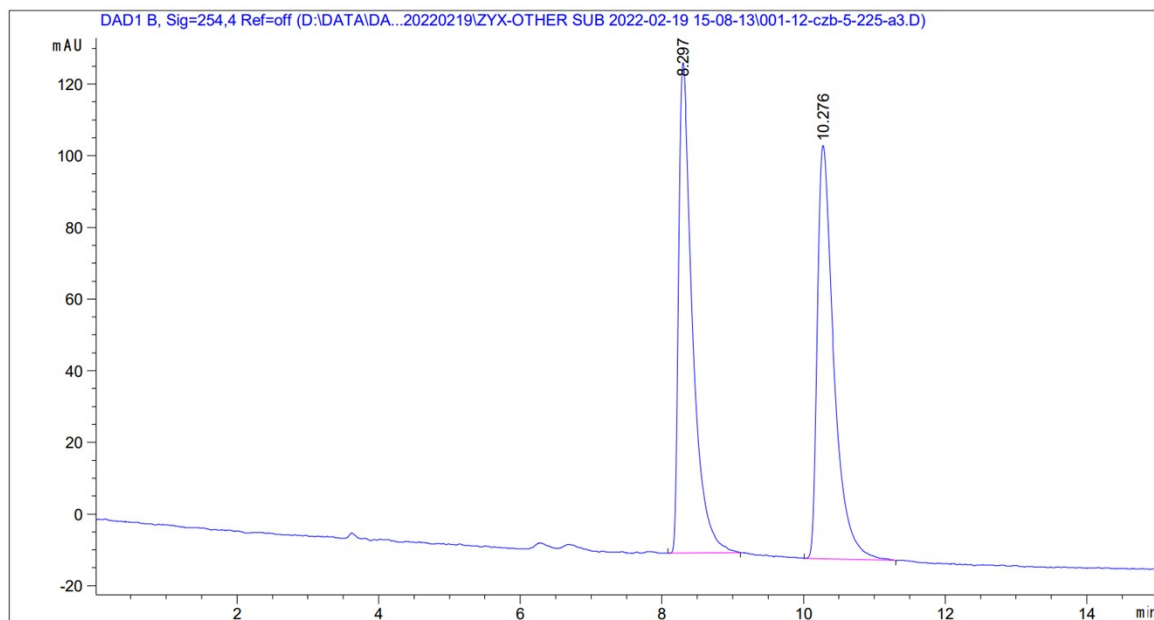

| 峰 # | 保留时间 [min] | 类型 | 峰宽 [min] | 峰面积 [mAU*s] | 峰高 [mAU]  | 峰面积 %   |
|-----|------------|----|----------|-------------|-----------|---------|
| 1   | 8.297      | BB | 0.2016   | 1873.49438  | 136.97008 | 50.0634 |
| 2   | 10.276     | BB | 0.2409   | 1868.74683  | 115.42234 | 49.9366 |

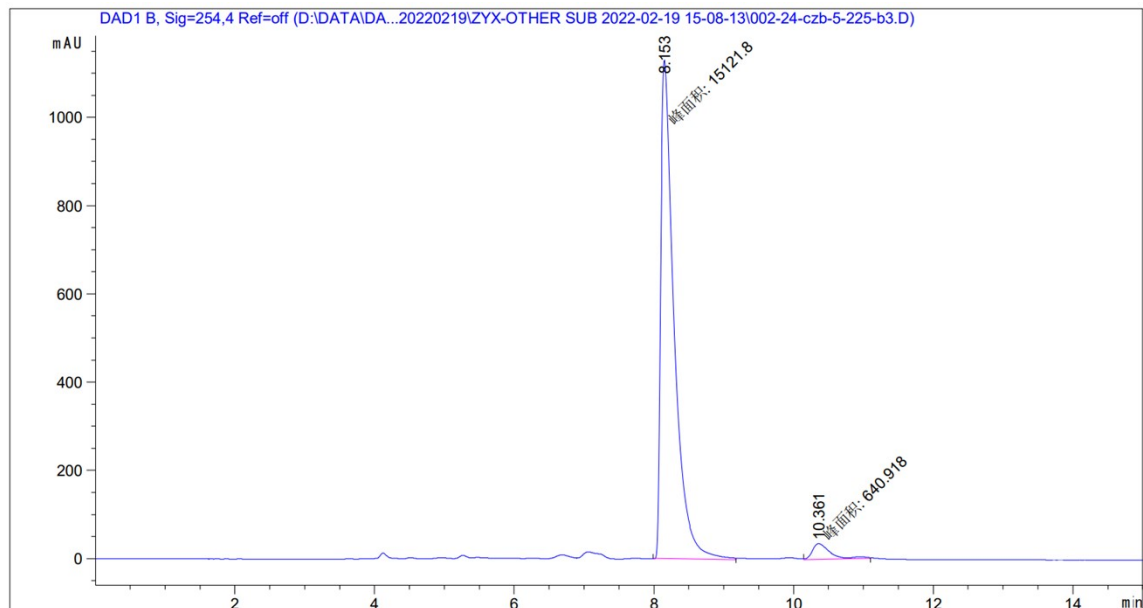

| 峰 # | 保留时间 [min] | 类型 | 峰宽 [min] | 峰面积 [mAU*s] | 峰高 [mAU]   | 峰面积 %   |
|-----|------------|----|----------|-------------|------------|---------|
| 1   | 8.153      | MM | 0.2232   | 1.51218e4   | 1129.22595 | 95.9340 |
| 2   | 10.361     | MM | 0.2972   | 640.91760   | 35.93908   | 4.0660  |

**(S)-N-(tert-Butyl)-2-(1,3-dimethyl-2-oxindolin-3-yl)acetamide (8)<sup>[11]</sup>**

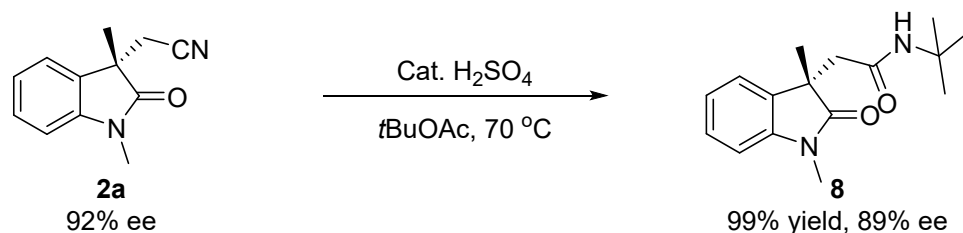

The mixture of **2a** (25 mg, 0.125 mmol, 1.0 equiv) and H<sub>2</sub>SO<sub>4</sub> (4 drops) in *t*-BuOAc (1 mL) was heated at 70 °C for 3 hours. After the reaction was completed (monitored by TLC), the reaction was quenched with saturated NaHCO<sub>3</sub> solution (20 mL) and extracted with EtOAc (20 mL × 3). The combined organic layers were washed with brine (50 mL), dried over anhydrous Na<sub>2</sub>SO<sub>4</sub> and filtrated, the filter was concentrated in vacuo. The remaining residue was purified by column chromatography on silica gel (petroleum ether/EtOAc) to yield product **8** as a white solid (33.9 mg, yield: 99%). Melting point: 137.4 - 139.7 °C.

**<sup>1</sup>H NMR (400 MHz, CDCl<sub>3</sub>):** δ 7.33 – 7.25 (m, 2H), 7.09 (t, *J* = 7.4 Hz, 1H), 6.85 (d, *J* = 7.7 Hz, 1H), 5.99 (s, 1H), 3.24 (s, 3H), 2.69 (d, *J* = 14.1 Hz, 1H), 2.56 (d, *J* = 14.1 Hz, 1H), 1.43 (s, 3H), 1.17 (s, 9H).

**<sup>13</sup>C NMR (100 MHz, CDCl<sub>3</sub>):** δ 180.6, 168.2, 142.9, 133.2, 128.2, 123.1, 122.8, 108.2, 51.0, 46.7, 45.3, 28.5, 26.4, 23.6.

**Optical Rotation:** [ $\alpha$ ]<sub>D</sub><sup>25</sup> = -17.3 (*c* = 0.50, CHCl<sub>3</sub>)

89 % ee. Determined by HPLC (Daicel Chiralpak AD-H Column, *n*-Hexane: *i*-PrOH = 85:15, flow rate 0.8 mL/min,  $\lambda$  = 254 nm): *t*<sub>R</sub> = 5.9 min (major), *t*<sub>R</sub> = 6.4 min (minor).

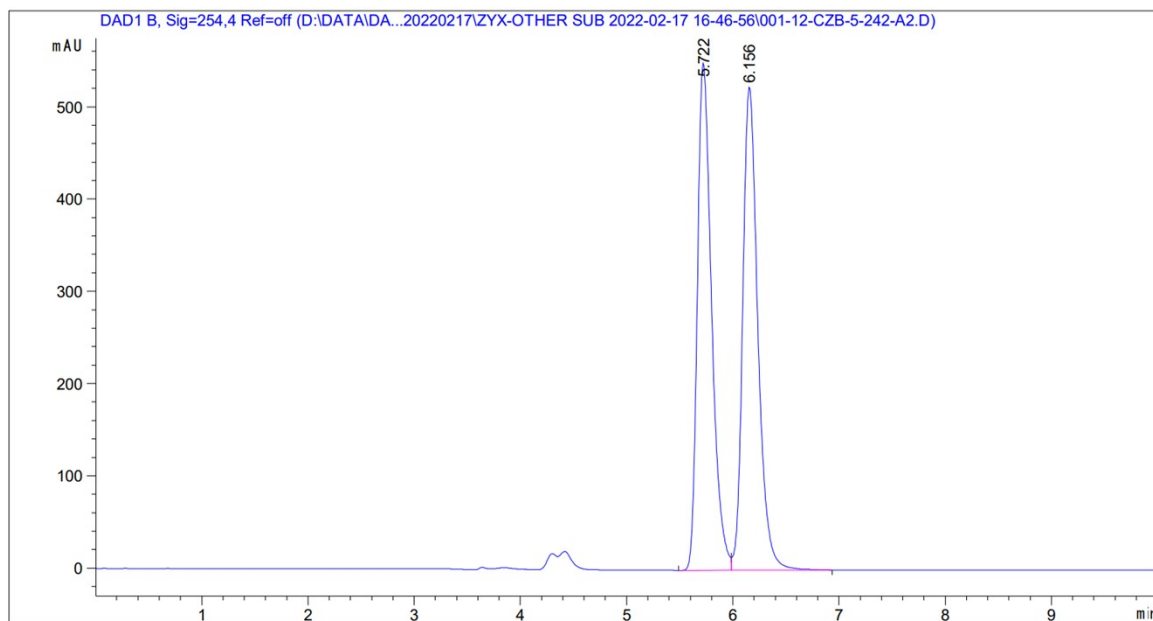

| 峰 # | 保留时间 [min] | 类型   | 峰宽 [min] | 峰面积 [mAU*s] | 峰高 [mAU]  | 峰面积 %   |
|-----|------------|------|----------|-------------|-----------|---------|
| 1   | 5.722      | BV   | 0.1428   | 5123.72510  | 549.66577 | 49.7856 |
| 2   | 6.156      | VV R | 0.1491   | 5167.85596  | 523.62158 | 50.2144 |

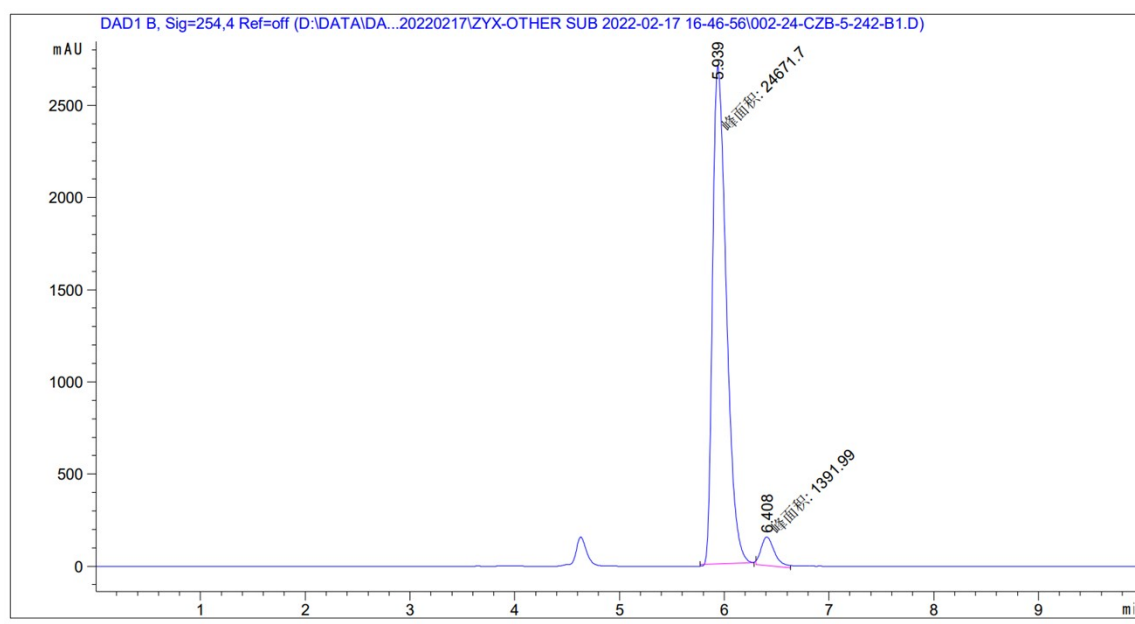

| 峰 # | 保留时间 [min] | 类型 | 峰宽 [min] | 峰面积 [mAU*s] | 峰高 [mAU]   | 峰面积 %   |
|-----|------------|----|----------|-------------|------------|---------|
| 1   | 5.939      | MM | 0.1520   | 2.46717e4   | 2704.35620 | 94.6593 |
| 2   | 6.408      | MM | 0.1499   | 1391.98889  | 154.79451  | 5.3407  |

**(S)-2-(5-Bromo-1,3-dimethyl-2-oxindolin-3-yl)acetonitrile (3)<sup>[12]</sup>**

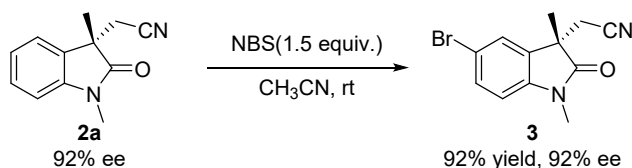

The mixture of **2a** (40 mg, 0.2 mmol, 1.0 equiv) and NBS(53.4 mg, 0.3 mmol, 1.5 equiv) in MeCN (1 mL) was stirred at r.t. for 12 hours. After the reaction was finished (monitored by TLC), the mixture was concentrated in vacuo. The remaining residue was purified by column chromatography on silica gel (petroleum ether/EtOAc) to yield product **3** as a yellow oil (51.4 mg, yield: 92%).

**<sup>1</sup>H NMR (400 MHz, CDCl<sub>3</sub>):** δ 7.56 (d, *J* = 1.9 Hz, 1H), 7.47 (dd, *J* = 8.3, 1.9 Hz, 1H), 6.79 (d, *J* = 8.3 Hz, 1H), 3.22 (s, 3H), 2.83 (d, *J* = 16.7 Hz, 1H), 2.59 (d, *J* = 16.7 Hz, 1H), 1.51 (s, 3H).

**<sup>13</sup>C NMR (100 MHz, CDCl<sub>3</sub>):** δ 176.9, 141.8, 132.9, 132.1, 126.4, 116.2, 115.9, 110.2, 45.1, 26.7, 26.2, 22.2.

**Optical Rotation:**  $[\alpha]_D^{25} = 17.9$  ( $c = 0.69$ ,  $\text{CHCl}_3$ )

92 % ee. Determined by HPLC (Daicel Chiralpak AD-H Column, *n*-Hexane: *i*-PrOH = 90:10, flow rate 1 mL/min,  $\lambda = 254$  nm):  $t_R = 11.1$  min (major),  $t_R = 9.2$  min (minor).

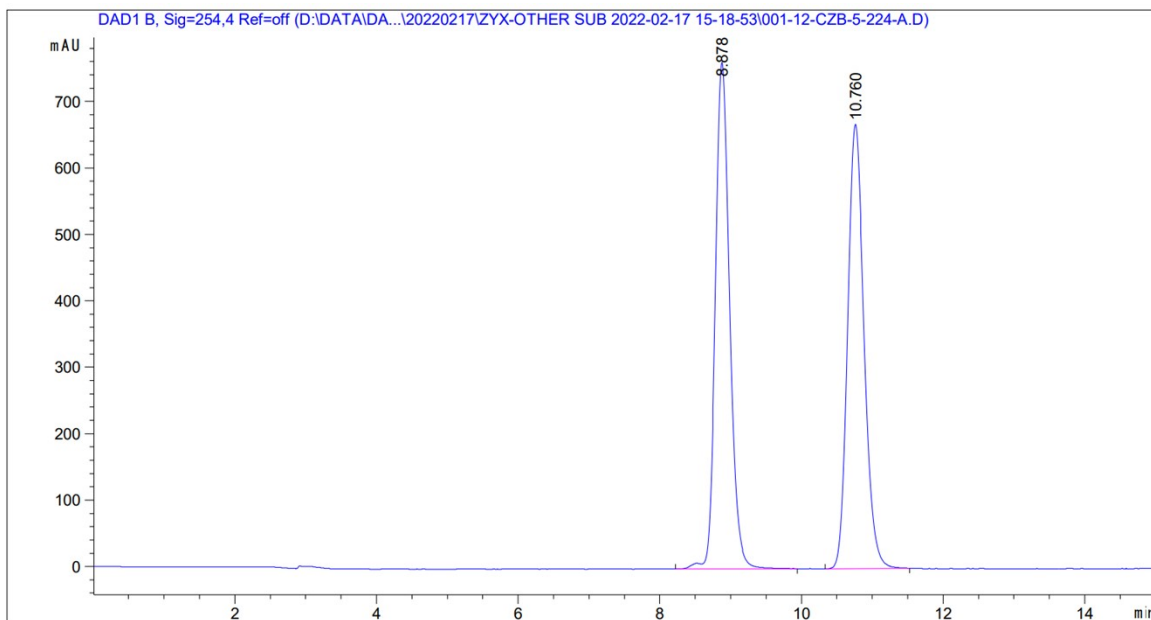

| 峰 # | 保留时间 [min] | 类型   | 峰宽 [min] | 峰面积 [mAU*s] | 峰高 [mAU]  | 峰面积 %   |
|-----|------------|------|----------|-------------|-----------|---------|
| 1   | 8.878      | VB R | 0.2136   | 1.06441e4   | 762.22589 | 49.7416 |
| 2   | 10.760     | BB   | 0.2497   | 1.07547e4   | 668.62000 | 50.2584 |

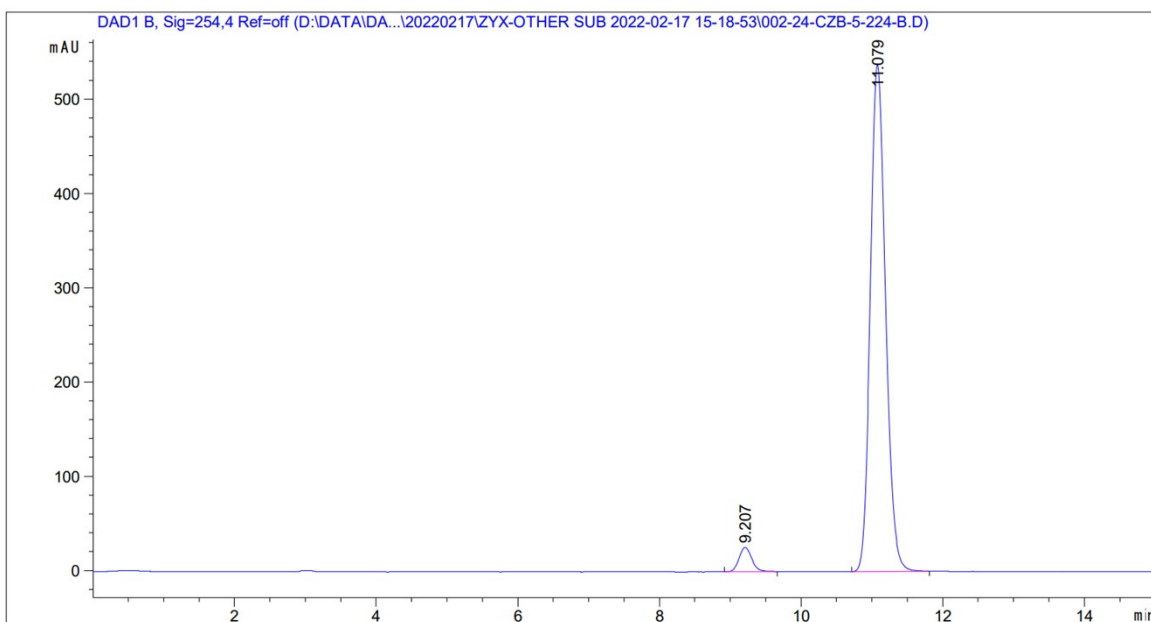



| 峰 # | 保留时间 [min] | 类型 | 峰宽 [min] | 峰面积 [mAU*s] | 峰高 [mAU]  | 峰面积 %   |
|-----|------------|----|----------|-------------|-----------|---------|
| 1   | 9.207      | BB | 0.1918   | 322.02426   | 25.76472  | 3.8865  |
| 2   | 11.079     | BB | 0.2288   | 7963.64746  | 537.74072 | 96.1135 |

**(3a *S*, 8a *R*)-5-Bromo-1,3a,8-trimethyl-1,2,3,3a,8,8a-hexahydropyrrolo[2,3-b]indole (4)<sup>[12]</sup>**

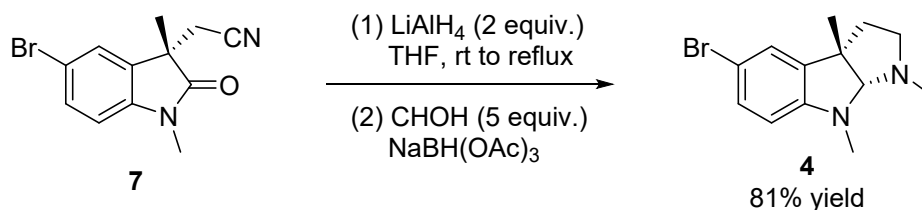

To a suspension of LiAlH<sub>4</sub> (11 mg, 0.28 mmol, 2.0 equiv) in THF (200 μL) at room temperature, **2a** (40 mg, 0.14 mmol, 1.0 equiv) was added dropwise as a solution in THF (300 μL). After the addition of **2a** was completed, the reaction was stirred for 1 hour under N<sub>2</sub> before being brought to reflux (70 °C) to stir for 1h. After the heating period had elapsed, the reaction was cooled to room temperature and complete consumption of **2a** was observed as indicated by TLC. The mixture was diluted with 2 mL of THF and carefully quenched with water (11 mg), 15% NaOH solution (11 mg) and water (33 mg), and the resulting mixture was stirred for 5 min. Then the mixture was allowed to separate and the remaining residue was washed with DCM (10 mL x 5). The combined organic layers were sequentially dried over MgSO<sub>4</sub>, filtered and concentrated in vacuo. The crude product was used for the next step without further purification.

To a stirring mixture of hexahydropyrrolo crude product (1.0 equiv) and paraformaldehyde (21 mg, 0.7 mmol, 5 equiv) in MeOH (3 mL) for 3 hours was added carefully NaBH<sub>4</sub> (25.9 mg, 0.7 mmol, 5 equiv), the reaction was stirred for additional 2 hours. After the reaction was completed (monitored by TLC), the reaction was quenched with saturated NaHCO<sub>3</sub> solution (10 mL) and extracted with DCM (20 mL × 3). The combined organic layers were washed with brine (50 mL), dried over anhydrous Na<sub>2</sub>SO<sub>4</sub> and filtrated, the filter was concentrated in vacuo. The remaining residue was purified by

column chromatography on silica gel (DCM/MeOH) to yield product **4** as a colorless oil (31.7 mg, yield: 81%).

**<sup>1</sup>H NMR (400 MHz, CDCl<sub>3</sub>):** δ 7.15 (dd, *J* = 8.3, 1.9 Hz, 1H), 7.05 (d, *J* = 1.8 Hz, 1H), 6.26 (d, *J* = 8.3 Hz, 1H), 4.11 (s, 1H), 2.91 (s, 3H), 2.76 – 2.68 (m, 1H), 2.62 (dd, *J* = 15.8, 8.1 Hz, 1H), 2.54 (s, 3H), 1.95 (dd, *J* = 9.4, 5.0 Hz, 2H), 1.41 (s, 3H).

**<sup>13</sup>C NMR (100 MHz, CDCl<sub>3</sub>):** δ 150.9, 139.0, 130.4, 125.5, 109.1, 108.0, 97.6, 53.3, 52.8, 40.7, 38.6, 36.4, 27.3.

**Optical Rotation:**  $[\alpha]_{\text{D}}^{25} = -68.9$  (*c* = 10.0, CHCl<sub>3</sub>)

**(3a *S*, 8a *R*)-5-Methoxy-1,3a,8-trimethyl-1,2,3,3a,8,8a-hexahydropyrrolo[2,3-*b*]indole ((-)-Esermethole)<sup>[12]</sup>**

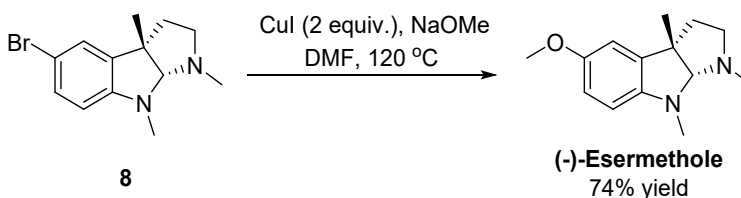

The mixture of **8**, CuI and NaOMe in DMF (1 mL) was stirred at 120 °C for 12 hours. After the reaction was completed (monitored by TLC), the mixture was diluted with water (10 mL) and extracted with DCM (10 mL × 3). The combined organic layers were washed with brine (50 mL), dried over anhydrous Na<sub>2</sub>SO<sub>4</sub> and filtrated, the filter was concentrated in vacuo. The remaining residue was purified by column chromatography on silica gel (DCM/MeOH) to yield product (-)-**Esermethole** as a colorless oil (31.7 mg, yield: 74%).

**<sup>1</sup>H NMR (400 MHz, CDCl<sub>3</sub>):** δ 6.73 – 6.63 (m, 2H), 6.37 (d, *J* = 8.3 Hz, 1H), 4.15 (s, 1H), 3.75 (s, 3H), 2.90 (s, 3H), 2.80 (m, 1H), 2.61 (dd, *J* = 16.0, 8.8 Hz, 1H), 2.53 (s, 3H), 2.00 – 1.94 (m, 2H), 1.44 (s, 3H).

**<sup>13</sup>C NMR (100 MHz, CDCl<sub>3</sub>):** δ 153.4, 146.2, 137.7, 112.6, 109.7, 108.0, 97.2, 56.0, 53.1, 52.8, 40.3, 38.3, 36.9, 27.2.

**Optical Rotation:**  $[\alpha]_{\text{D}}^{25} = -76.3$  (*c* = 2.50, CHCl<sub>3</sub>)

Absolute stereochemistry was determined by comparing the optical rotation value  $[\alpha]_{\text{D}}^{22} = 98.0$ , *c* = 0.4, CHCl<sub>3</sub>, (+)-**Esermethole** in the literature.<sup>[13]</sup>

### Synthesis of 1-(4-methoxyphenyl)ethan-1-imine (**9**)<sup>[14]</sup>

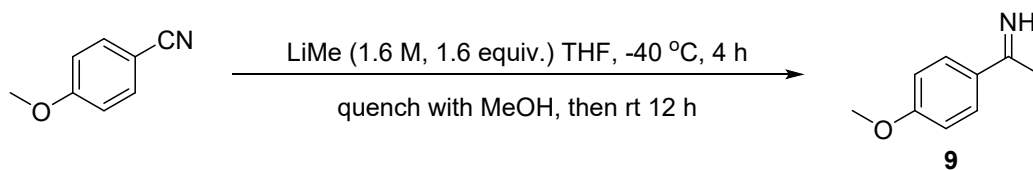

A round-bottom flask was charged with nitrile (5 g, 40.0 mmol) and THF (40 mL). The mixture was cooled to -40 °C and MeLi (40.0 mL, 1.6 equiv, 1.6 M in diethyl ether) was added dropwise over 30 min. Next, the resulting mixture was stirred for 4 hours at -40 °C. The mixture was quenched with anhydrous MeOH (10 mL). The cooling bath was removed, and the reaction mixture was allowed to warm to r.t. overnight. The resulting white slurry was filtered through a 2 cm pad of Celite on a medium porosity stone frit filter, and the filtrate was concentrated on a rotary evaporator. The resulting turbid oil was dissolved in MTBE (40 mL) and filtered through a 2 cm pad of Celite on a medium porosity stone frit filter, and the filtrate was concentrated on a rotary evaporator to furnish a yellow solid **9** (3.4 g, yield: 57%).

<sup>1</sup>H NMR (400 MHz, THF-d<sub>8</sub>): δ 9.52 (s, 1H), 7.81 (d, *J* = 6.0 Hz, 2H), 6.91 – 6.86 (m, 2H), 3.78 (s, 3H), 2.33 (s, 3H).

<sup>13</sup>C NMR (100 MHz, THF-d<sub>8</sub>): δ 172.5, 162.5, 132.6, 129.1, 114.2, 55.7, 26.0.

### Synthesis of σ-alkyl-Ni(II) complex **11**:<sup>[15]</sup>

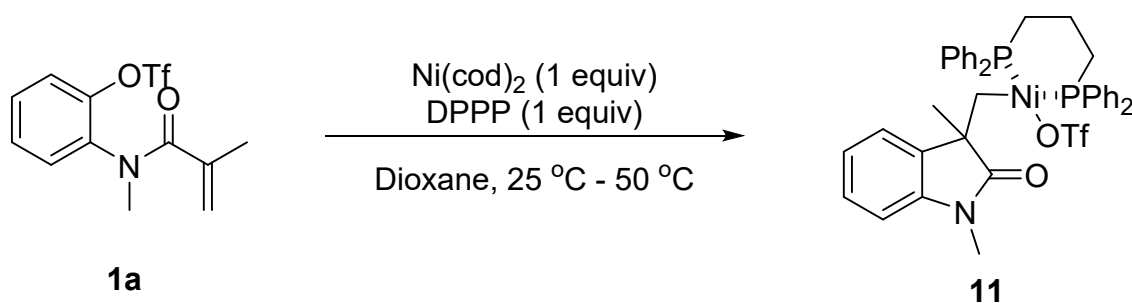

In a nitrogen filled glove box, a 50 mL round bottom flask containing a PTFE-coated stirring bar was charged with Ni(COD)<sub>2</sub> (0.5 mmol, 135 mg), dppp (0.5 mmol, 206 mg) and dry dioxane (5 mL), the mixture was stirred at r.t. overnight. **1a** (0.5 mmol, 161 mg) was added to the above orange mixture and stirred at 50 °C for 24 hours. Dry n-hexane (20 mL) was added to the brown mixture and filtered. The resulting particulate was

washed with *n*-hexane (5 x 10 mL) to remove residual cyclooctadiene and **1a** was dried under vacuum to give the complex **11** as a orange-yellow solid (240 mg, 61%). **HRMS (ESI)**:  $m/z$  Calcd for  $C_{39}H_{39}F_3NNiO_4P_2S$   $[M+H]^+$  794.1381; found:  $m/z$  794.1379.

Crystallographic data for compounds **11**:

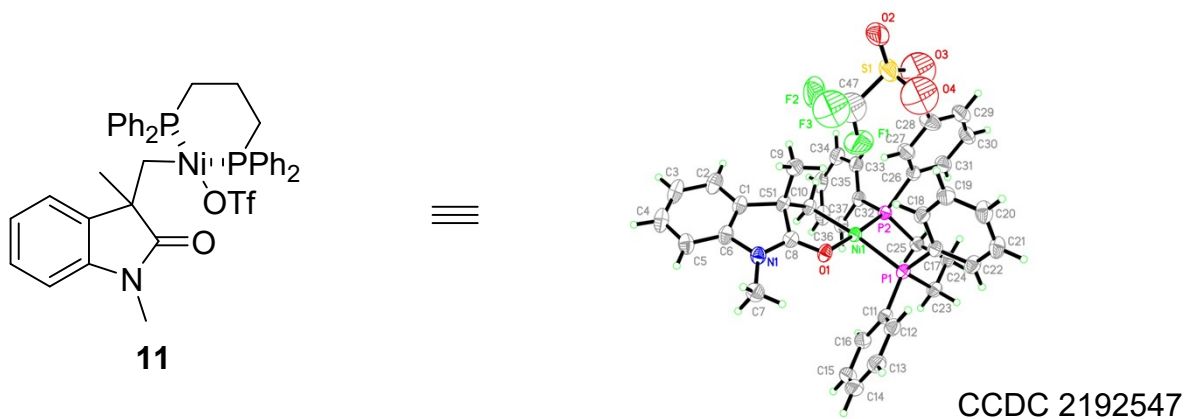

## 7、References

- [1] D. A. Everson, B. A. Jones, D. J. Weix, *J. Am. Chem. Soc.*, 2012, **134**, 6146–6159.
- [2] W. Kong, Q. Wang, J. Zhu, *J. Am. Chem. Soc.* 2015, **137**, 16028–16031.
- [3] W. Kong, Q. Wang, J. Zhu, *Angew. Chem. Int. Ed.* 2017, **56**, 3987–3991.
- [4] Y. Li, K. Wang, Y. Ping, Y. Wang, W. Kong, *Org. Lett.* 2018, **20**, 921–924.
- [5] Y. Feng, S. Zhao, G. Du, S. Zhang, D. Zhang, H. Liu, X. Li, Y. Dong, F.-G. Sun, *Org. Chem. Fron.* 2021, **8**, 1149–1154.
- [6] H. Li, J. Chen, J. Dong, W. Kong, *Org. Lett.* 2021, **23**, 6466–6470.
- [7] Z. Ni, X. Huang, J. Wang, Y. Pan, *RSC. Adv.*, 2016, **6**, 522–526.
- [8] Y. Kobayashi, H. Kamisaki, H. Takeda, Y. Yasui, R. Yanada, Y. Takemoto, *Tetrahedron*, 2007, **63**, 2978–2989.
- [9] Y. Yasui, H. Kamisaki, Y. Takemoto, *Org. Lett.* 2008, **10**, 3303–3306.
- [10] G. Wang, C. Shen, X. Ren, K. Dong, *Chem. Commun.* 2022, **58**, 1135–1138.
- [11] W. Kong, Q. Wang, J. Zhu, *Angew. Chem. Int. Ed.* 2016, **55**, 9714–9718.
- [12] J. Xu, L. Liang, H. Zheng, Y. R. Chi, R. Tong, *Nat. Commun.*, 2019, **10**, 4754.
- [13] Chen, M.; Wang, X.; Yang, P.; Kou, X.; Ren, Z.; Guan, Z. *Chem., Angew. Chem. Int. Ed.* 2020, **59**, 12199–12205.
- [14] V. N. Wakchaure, B. List, *Angew. Chem. Int. Ed.*, 2016, **55**, 15775–15778.
- [15] K. Wang, Z. Ding, Z. Zhou, W. Kong, *J. Am. Chem. Soc.*, 2018, **140**, 12364–12368.

## 8、 The copies of $^1\text{H}$ , $^{13}\text{C}$ and $^{19}\text{F}$ NMR spectra

1a

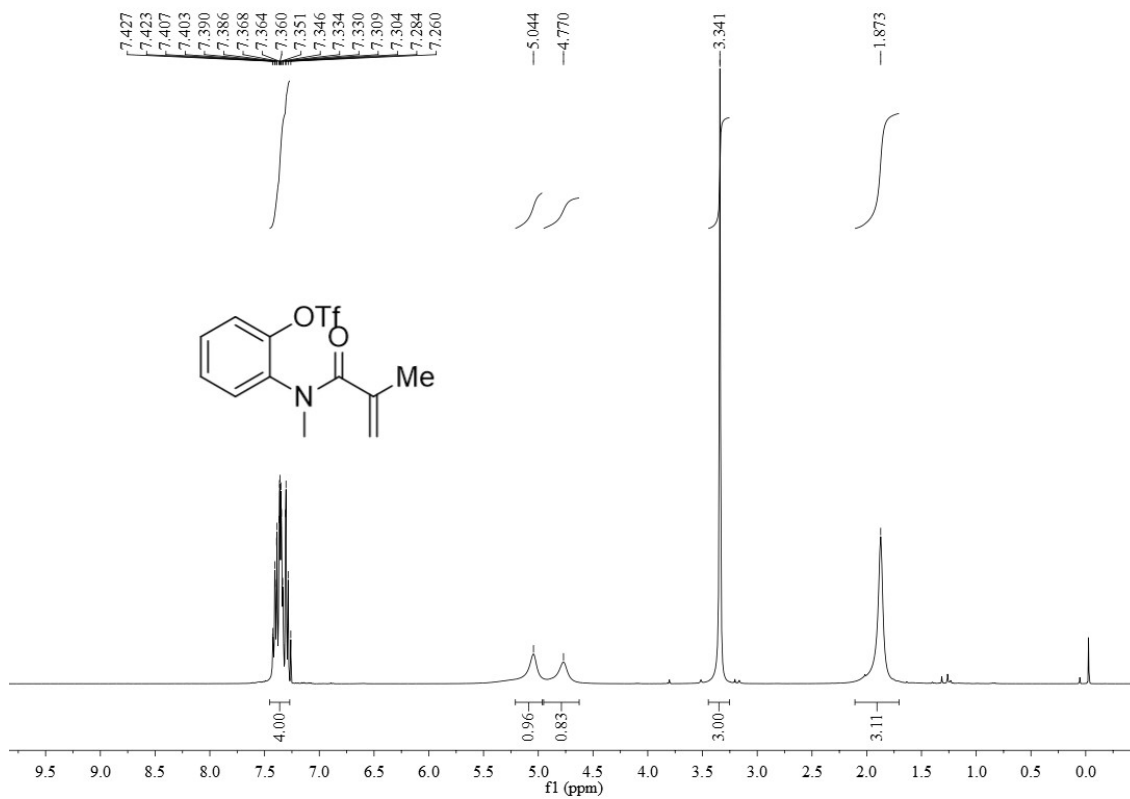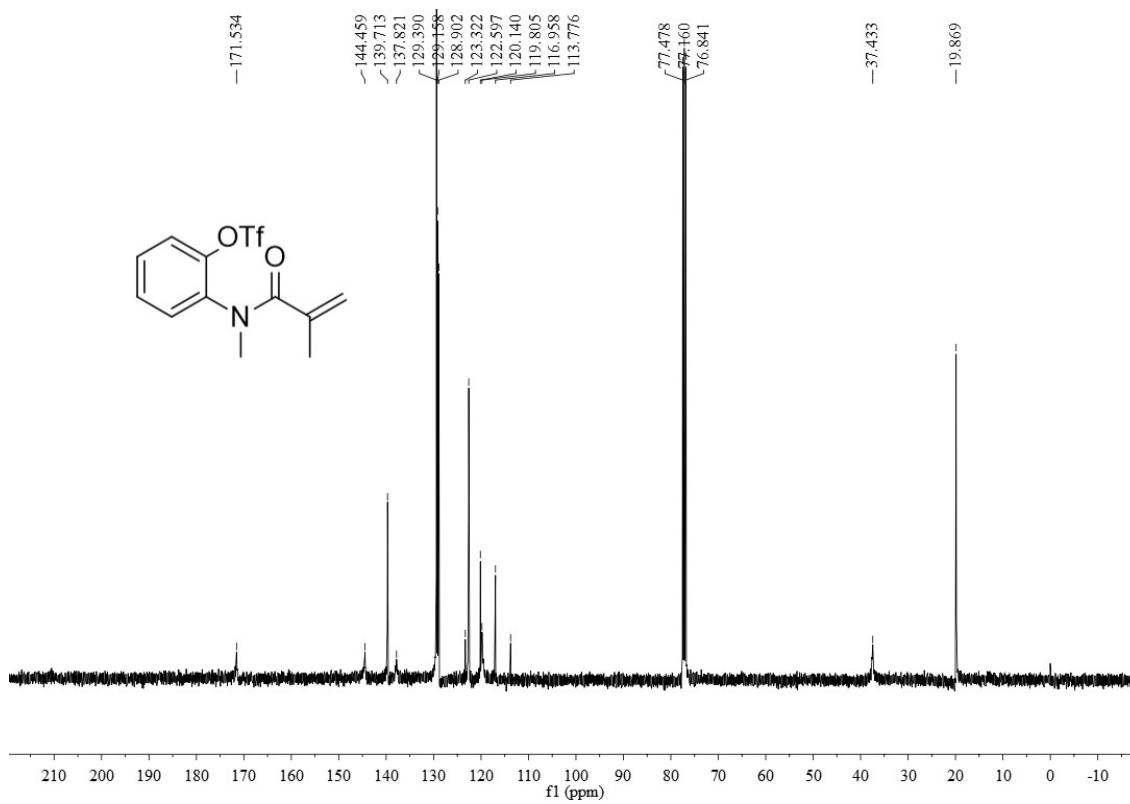

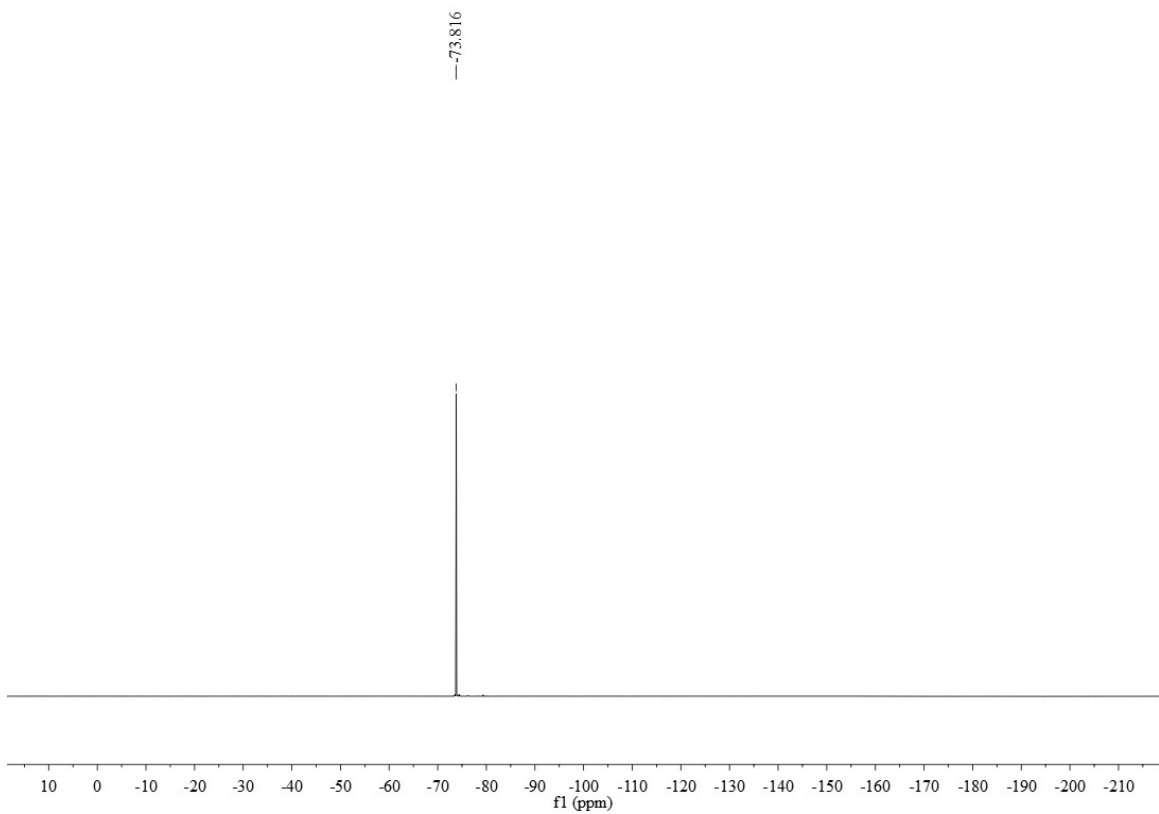

**1b**

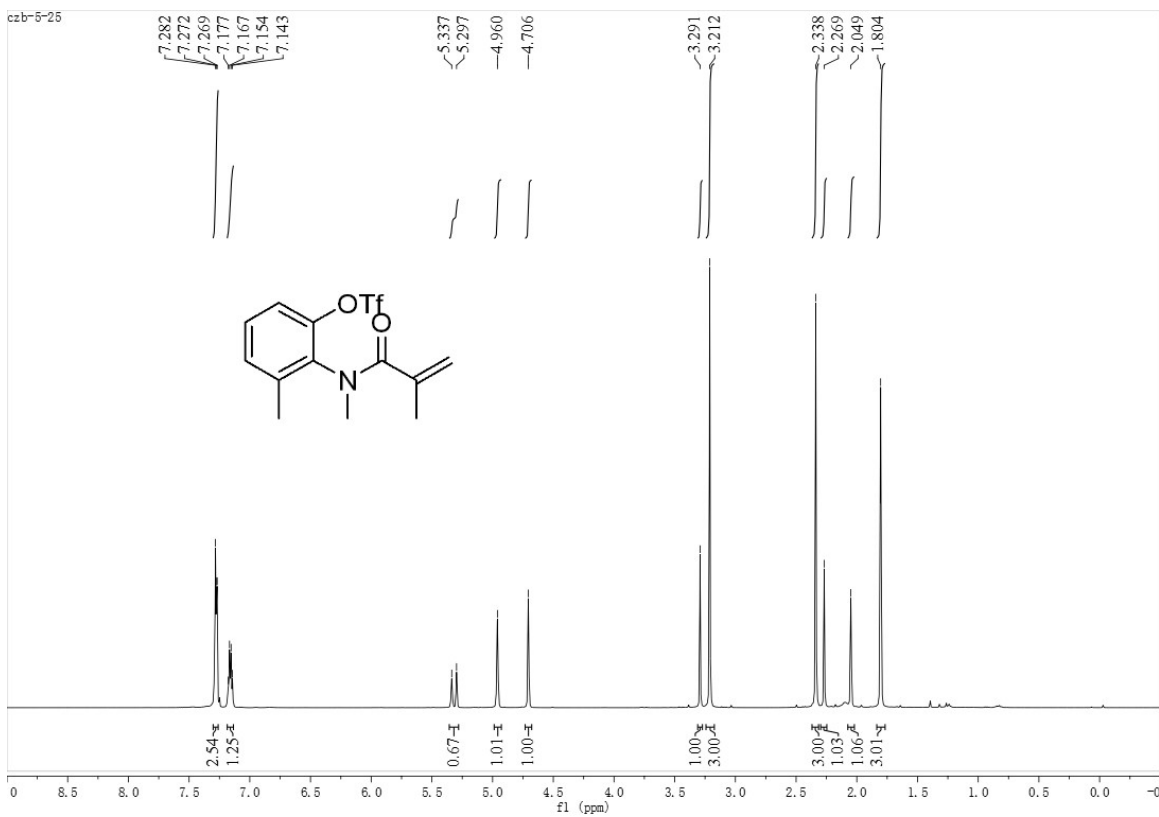

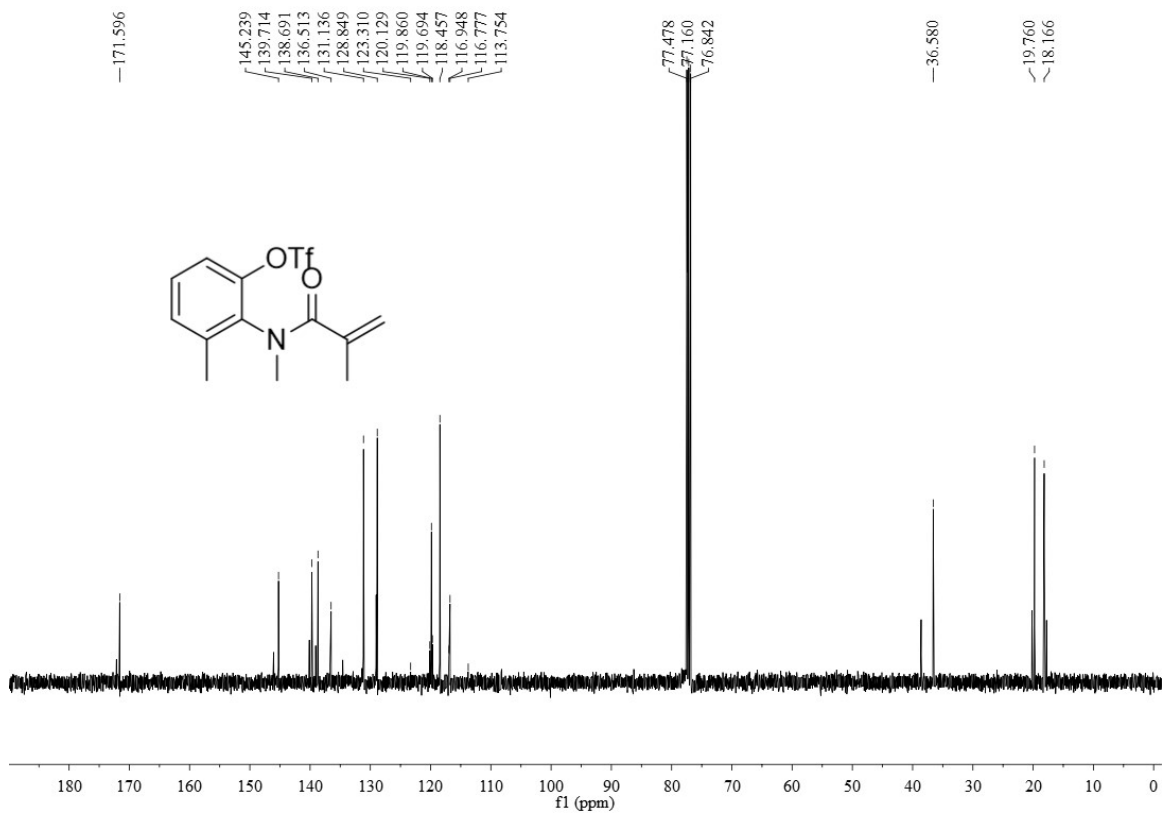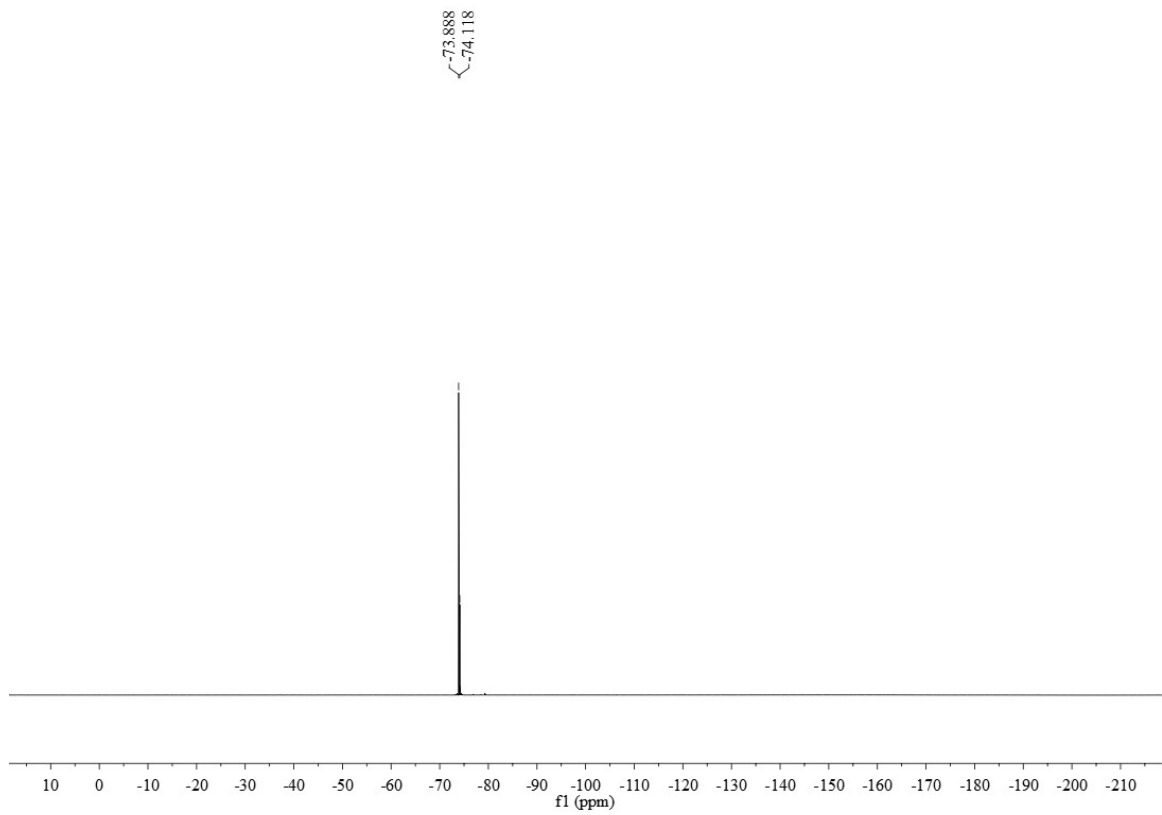

1c



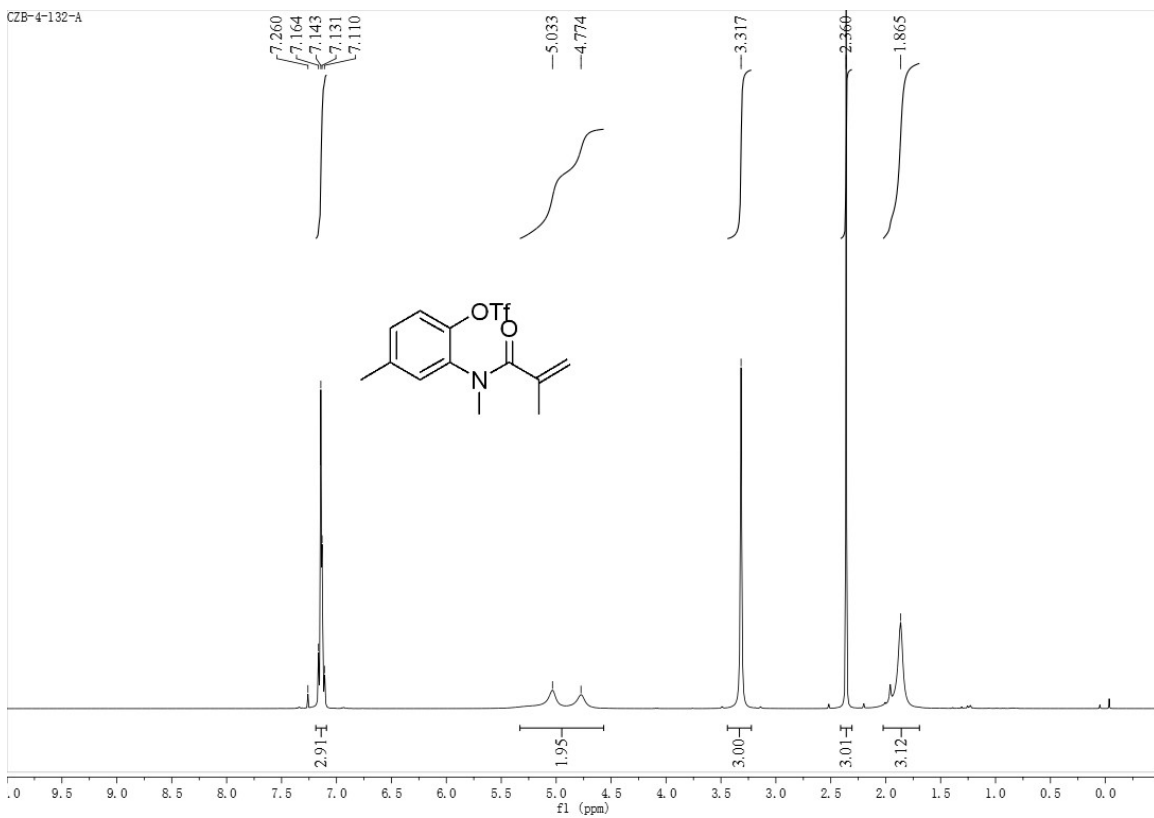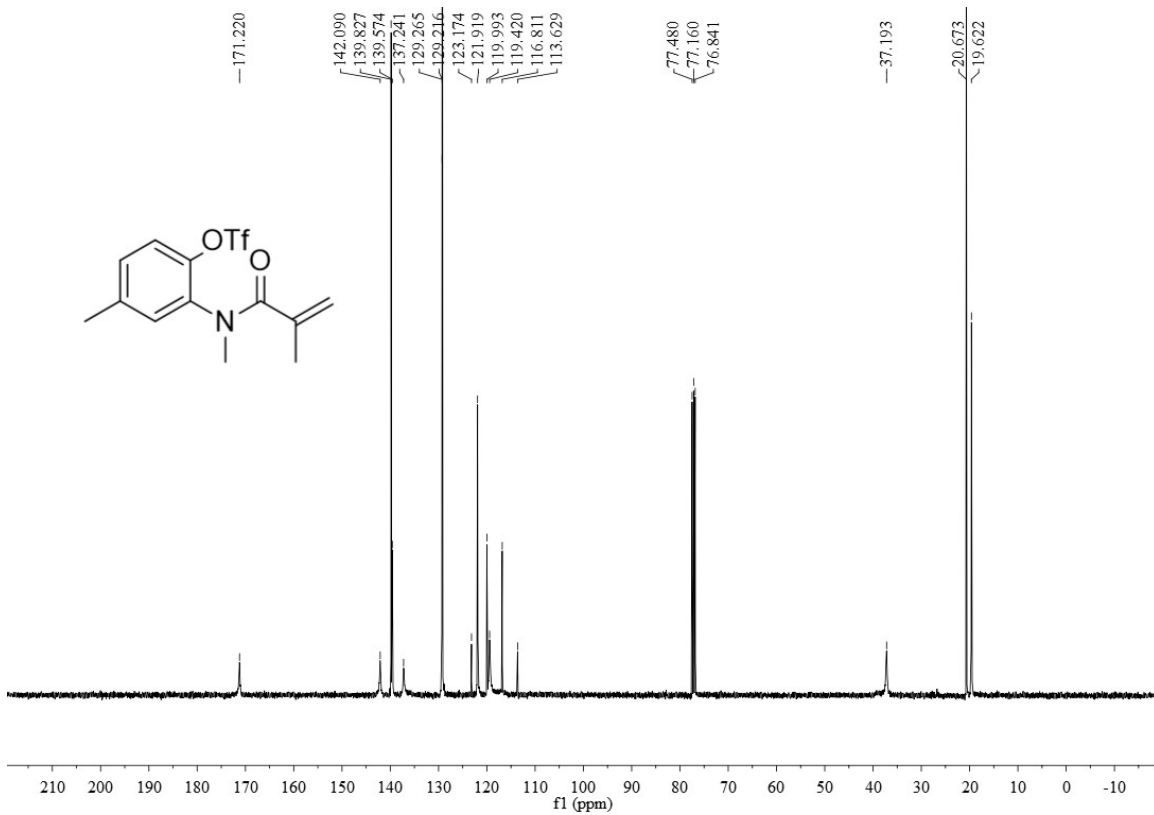

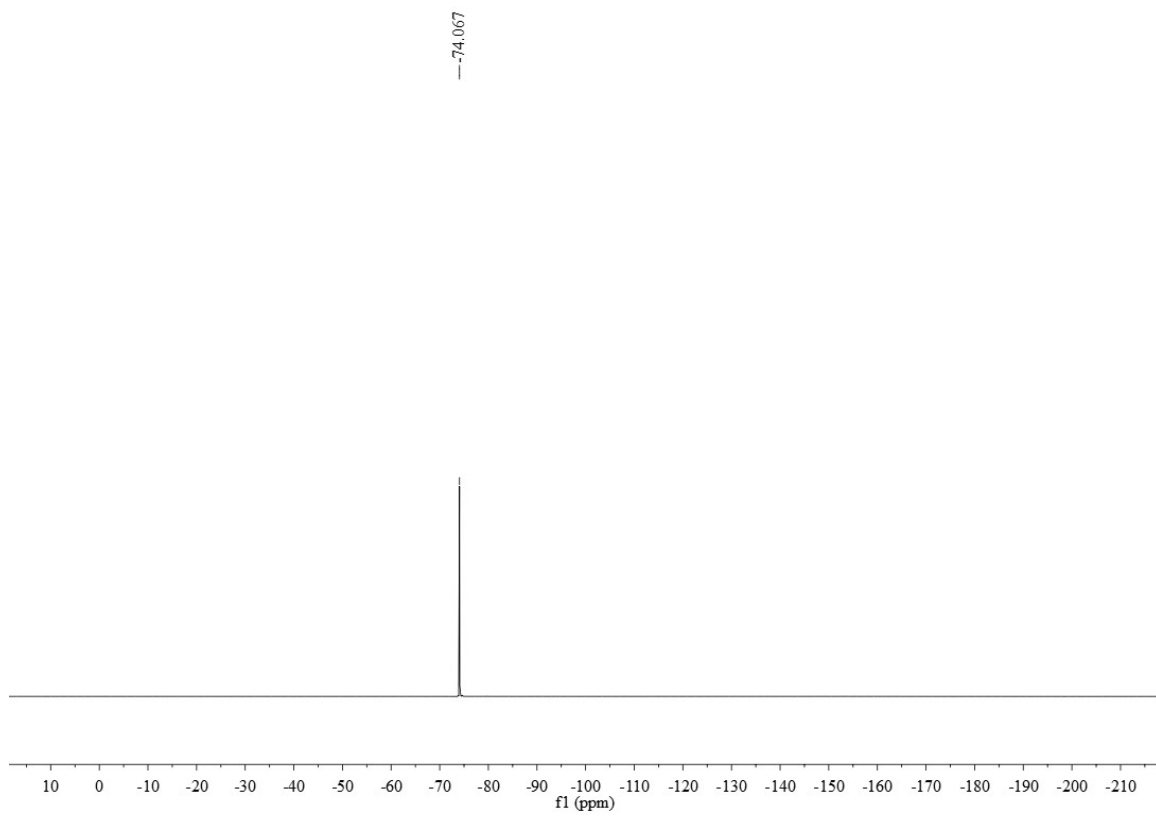

**1d**

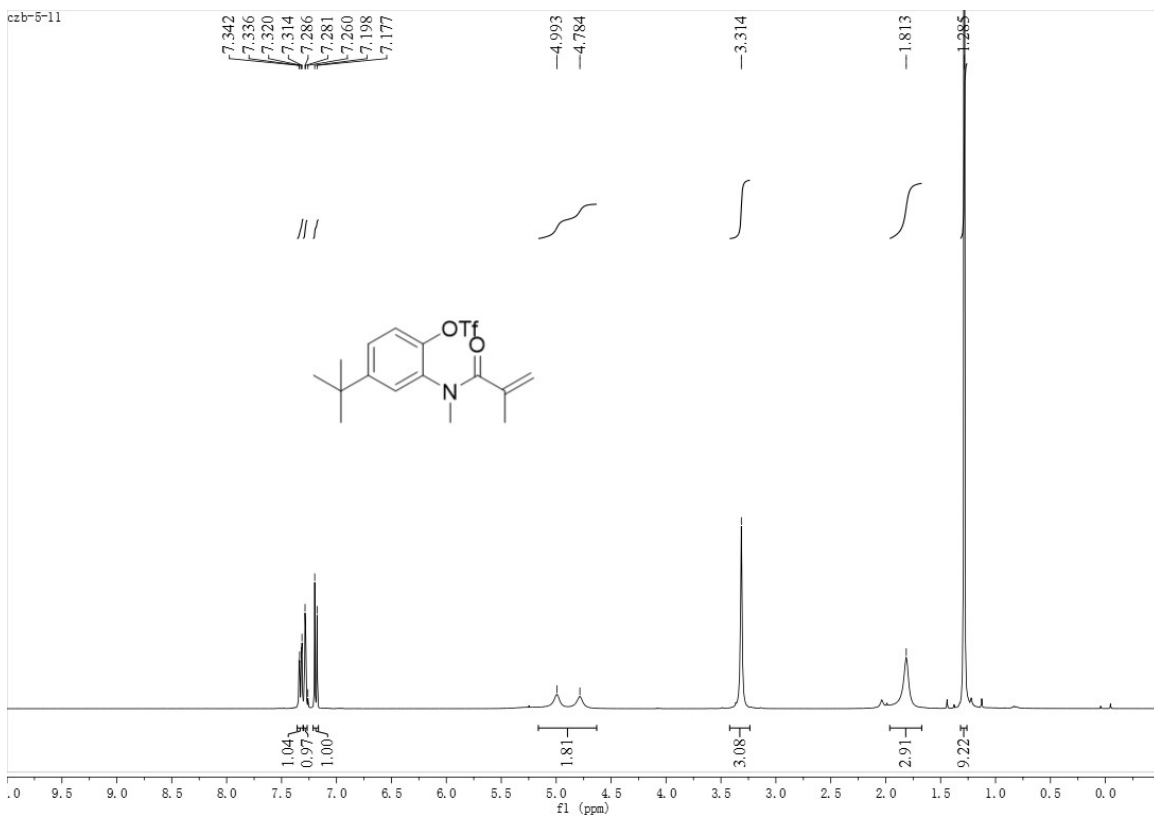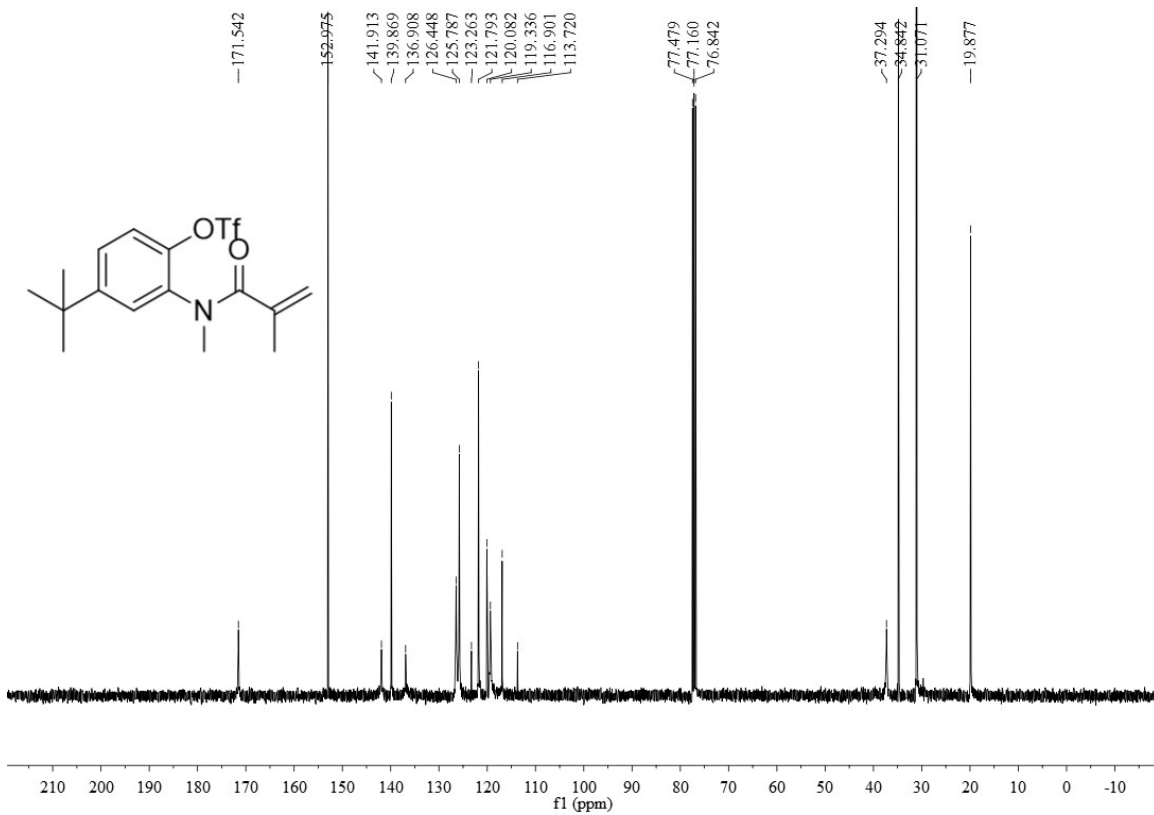

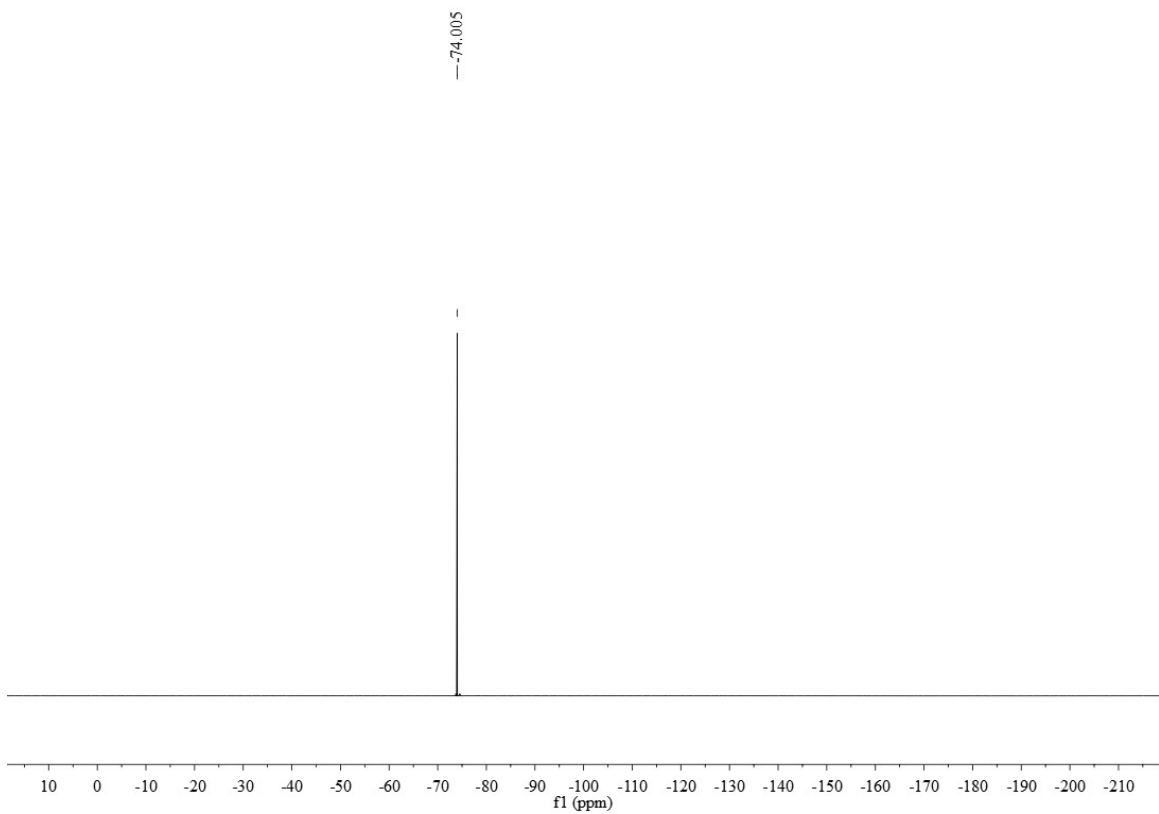

**1e**

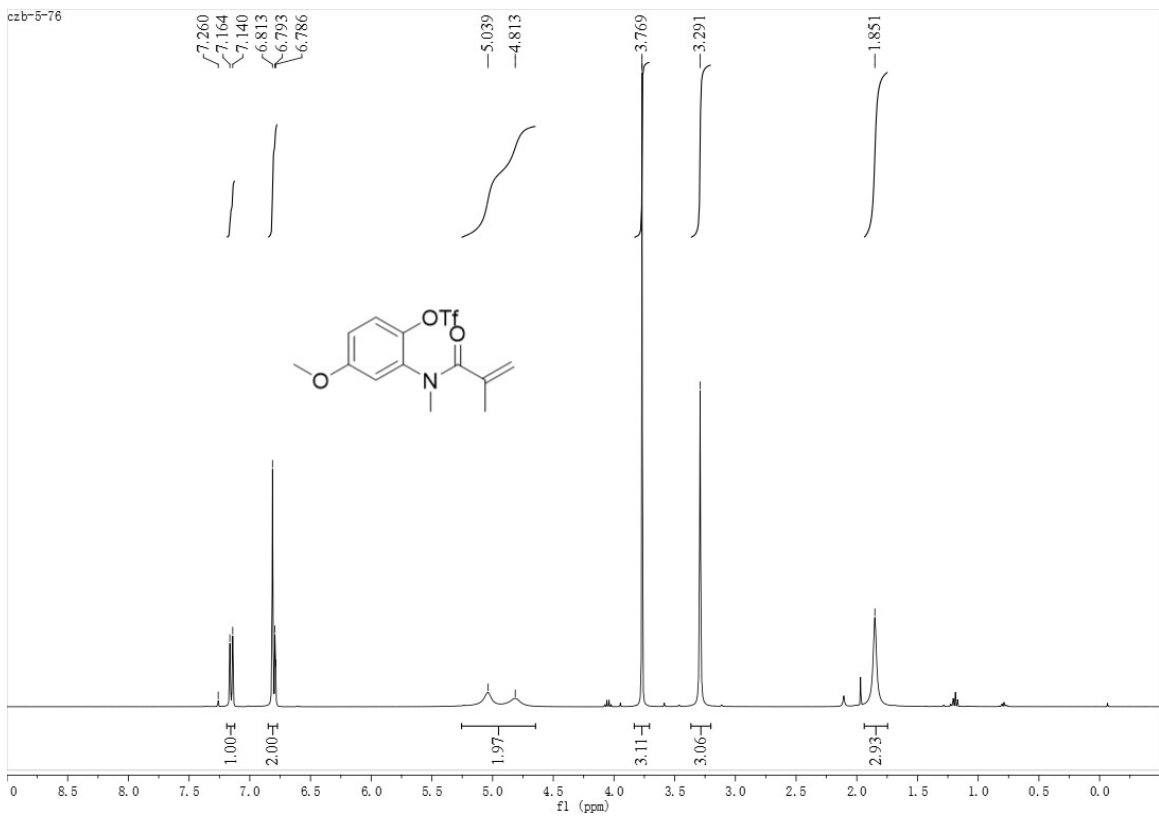

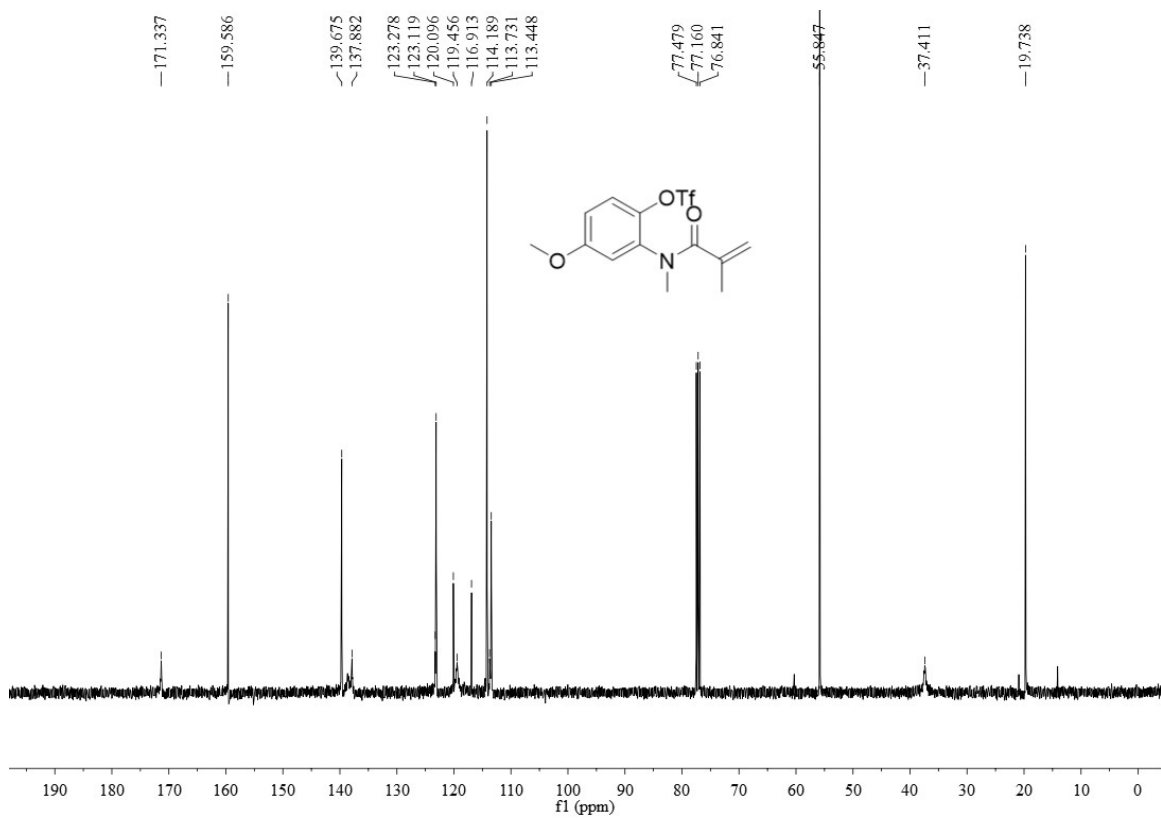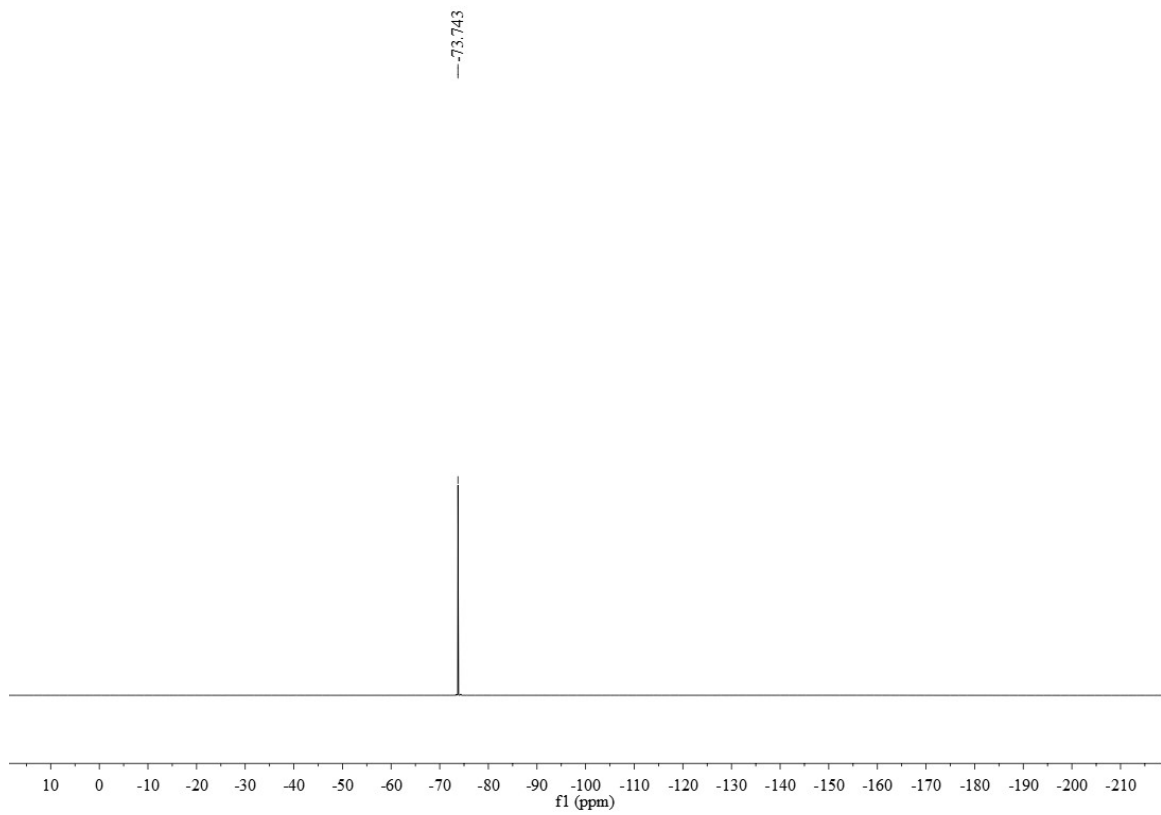

1f

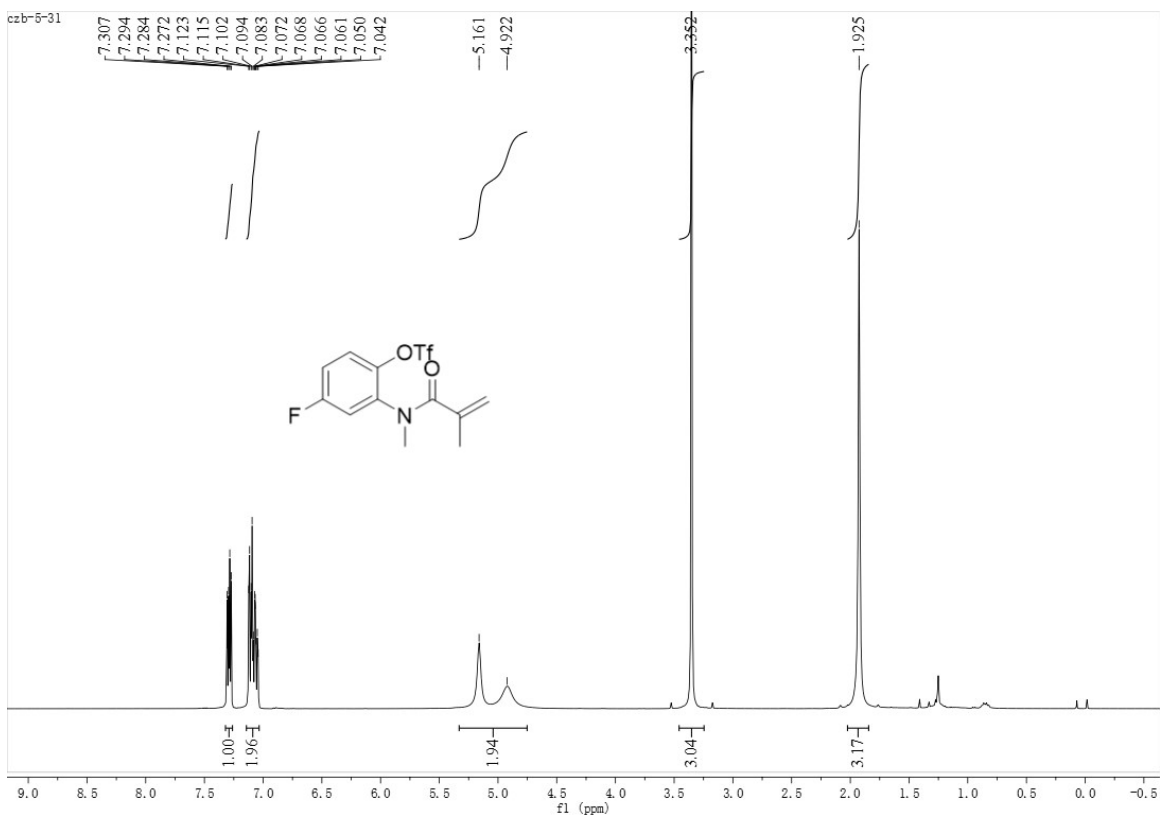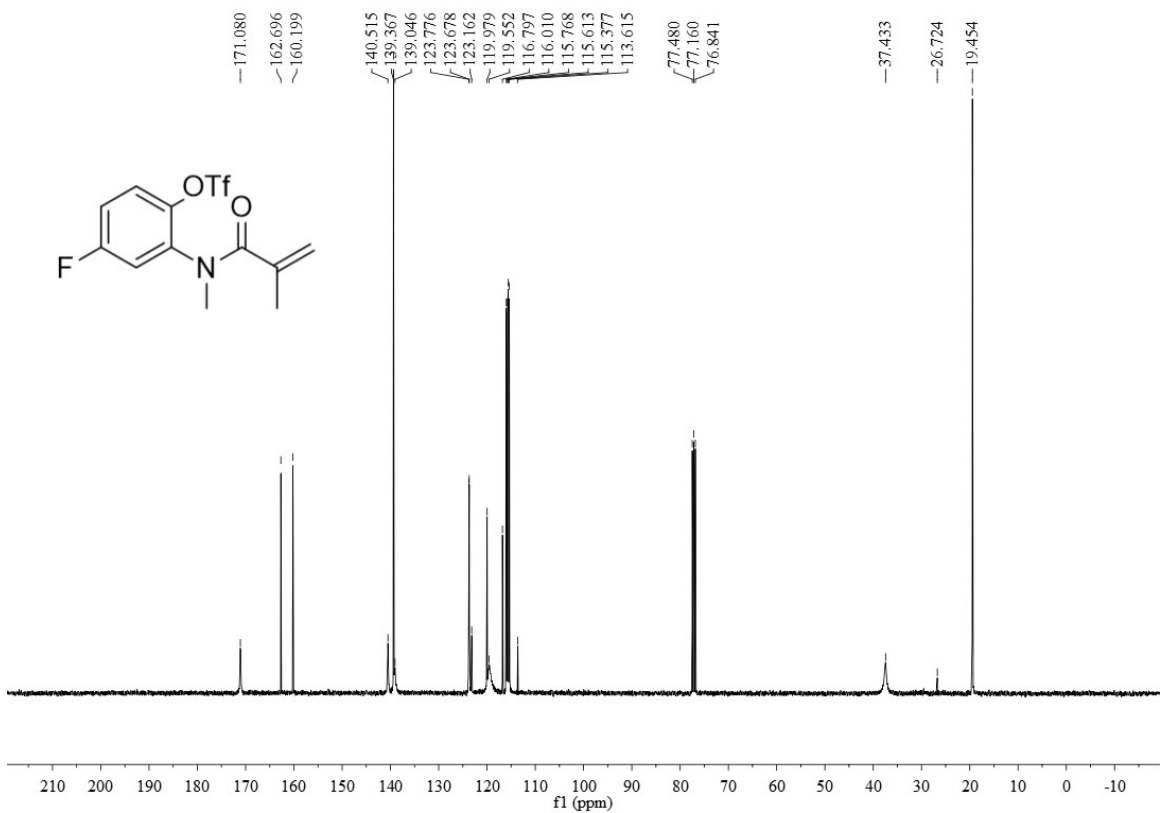

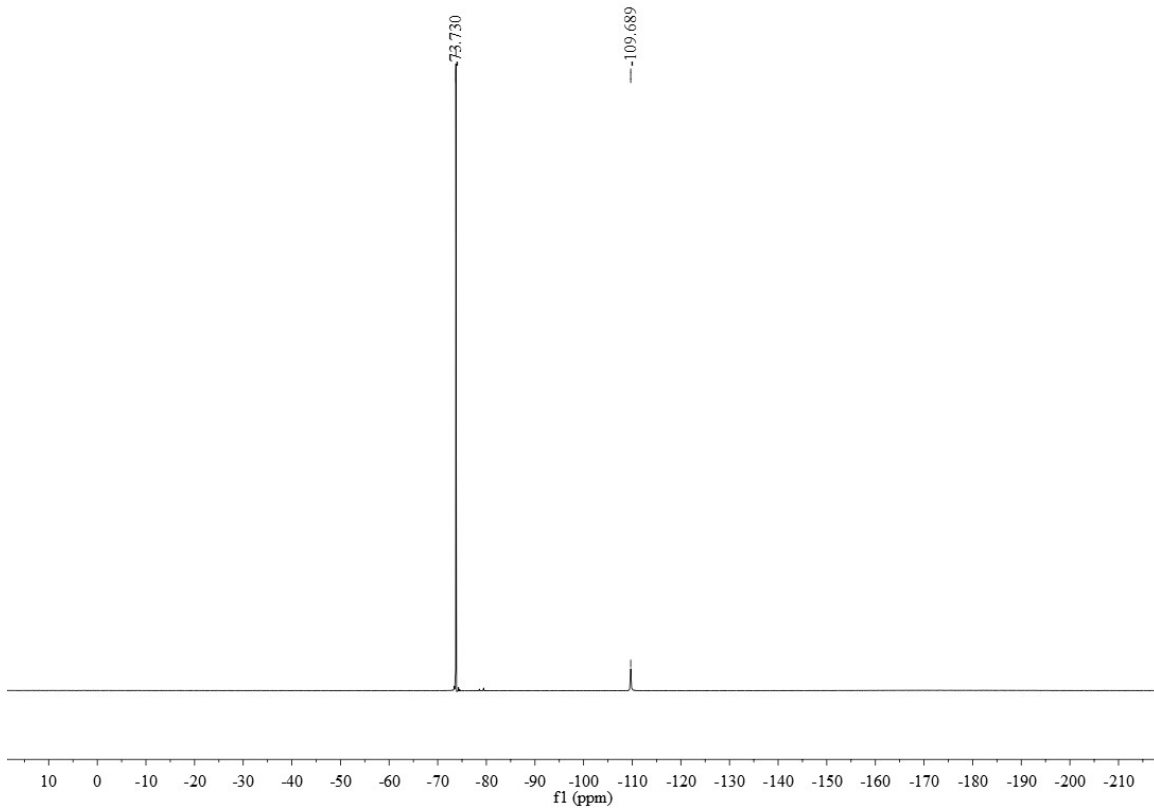

**1g**

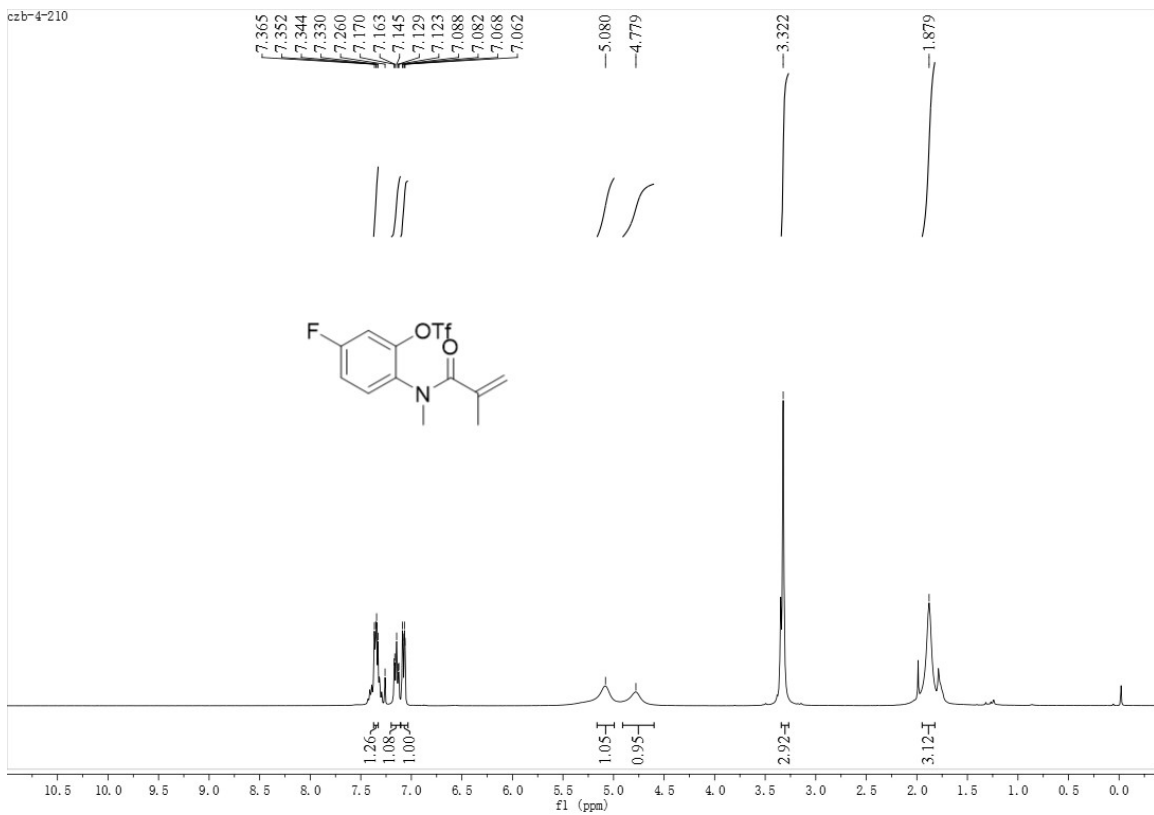

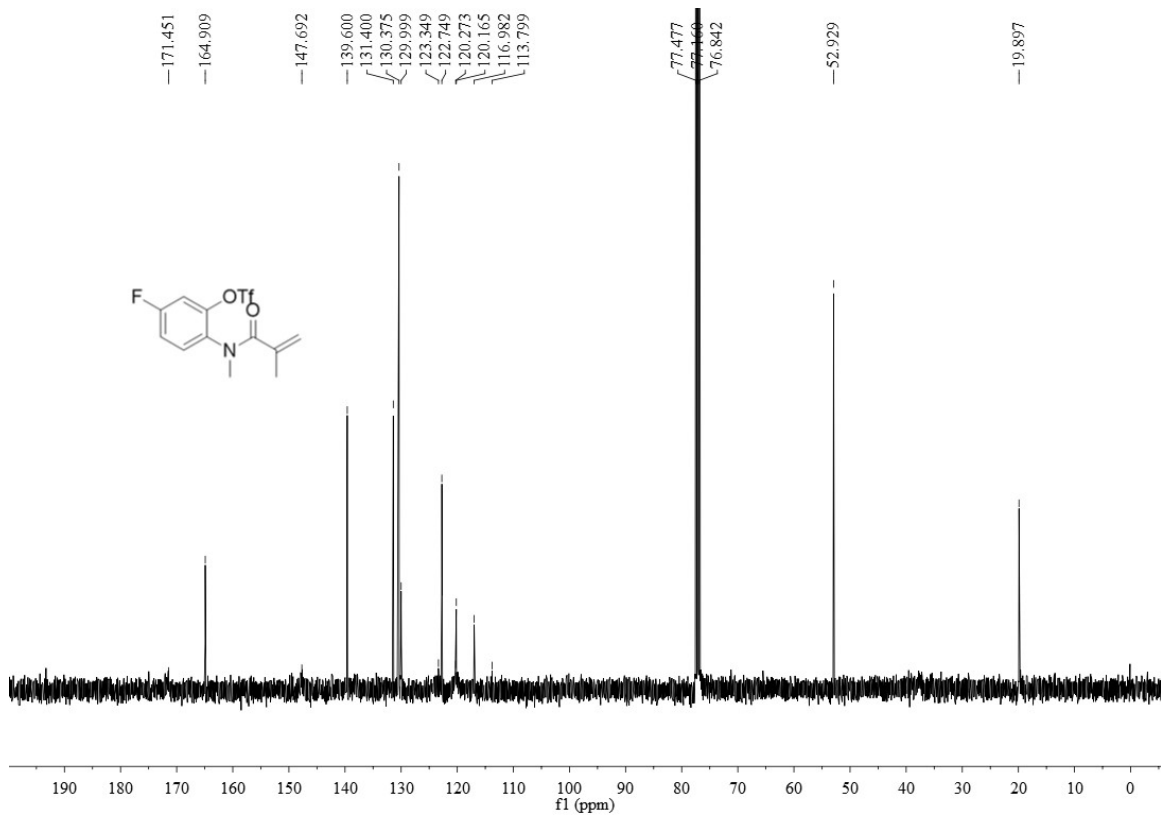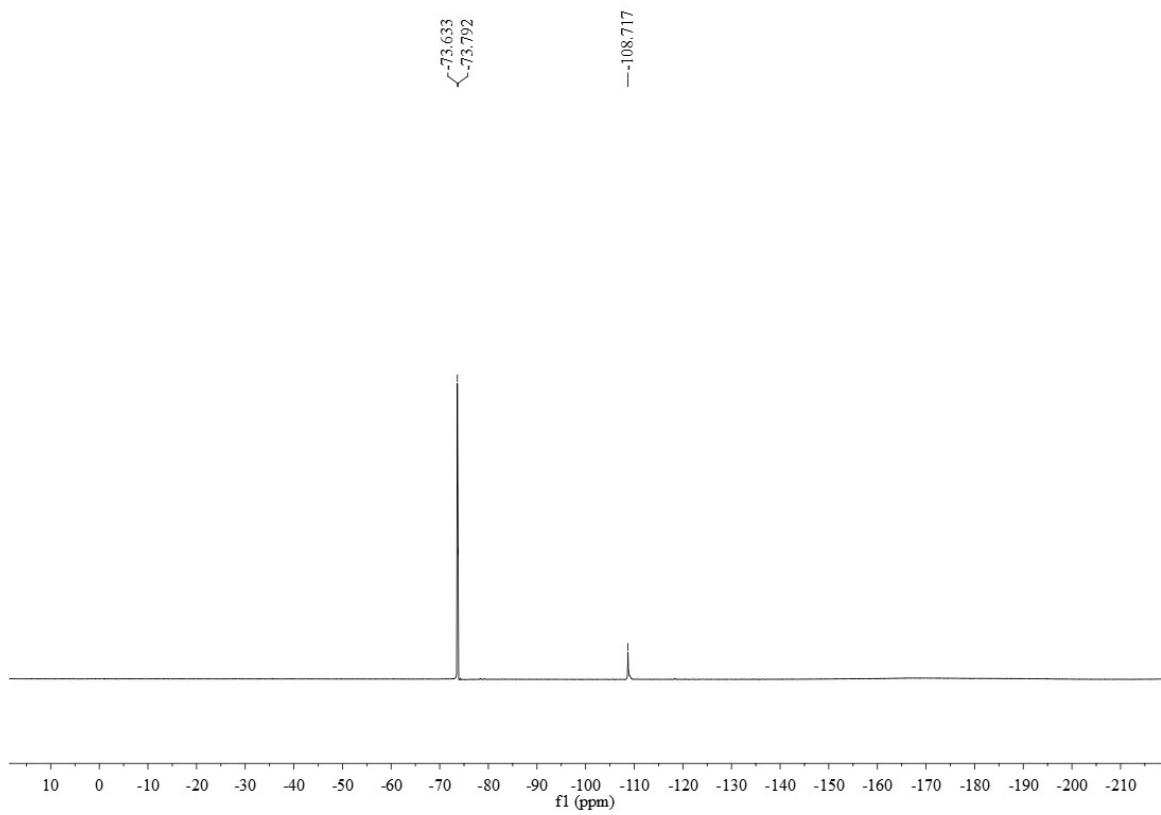



1h

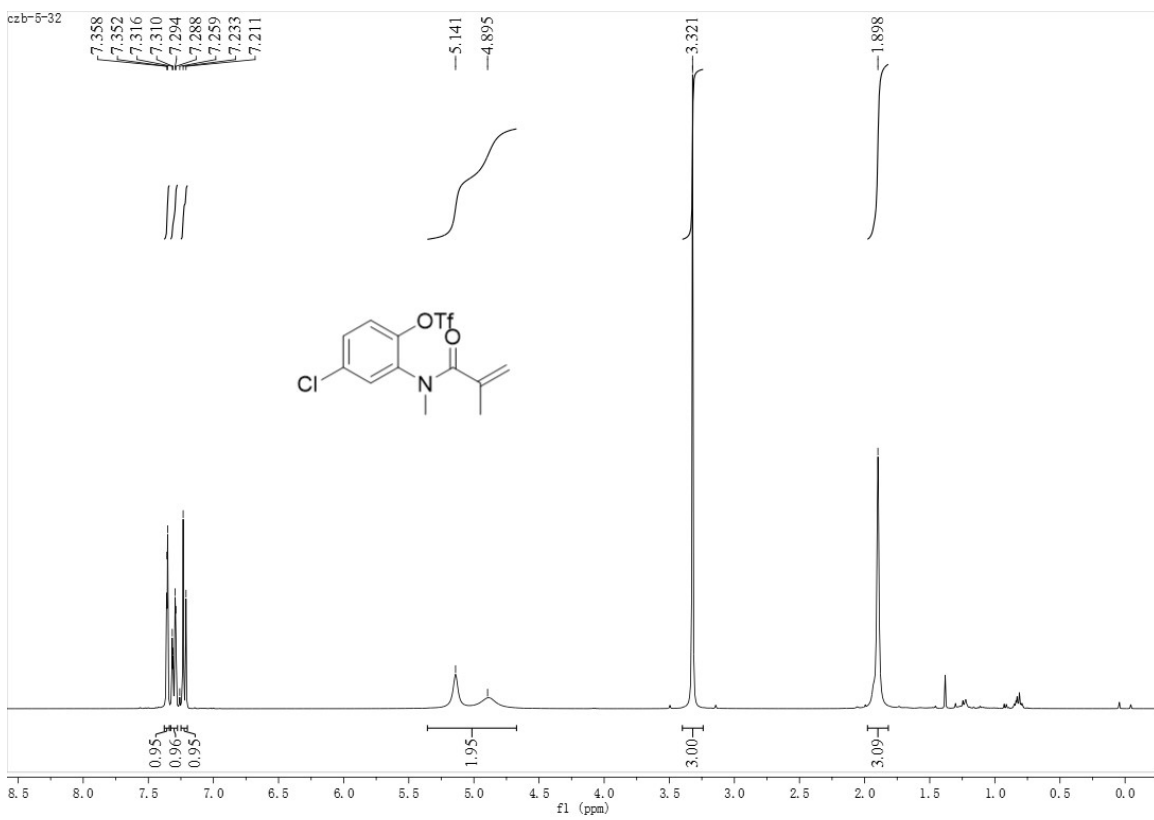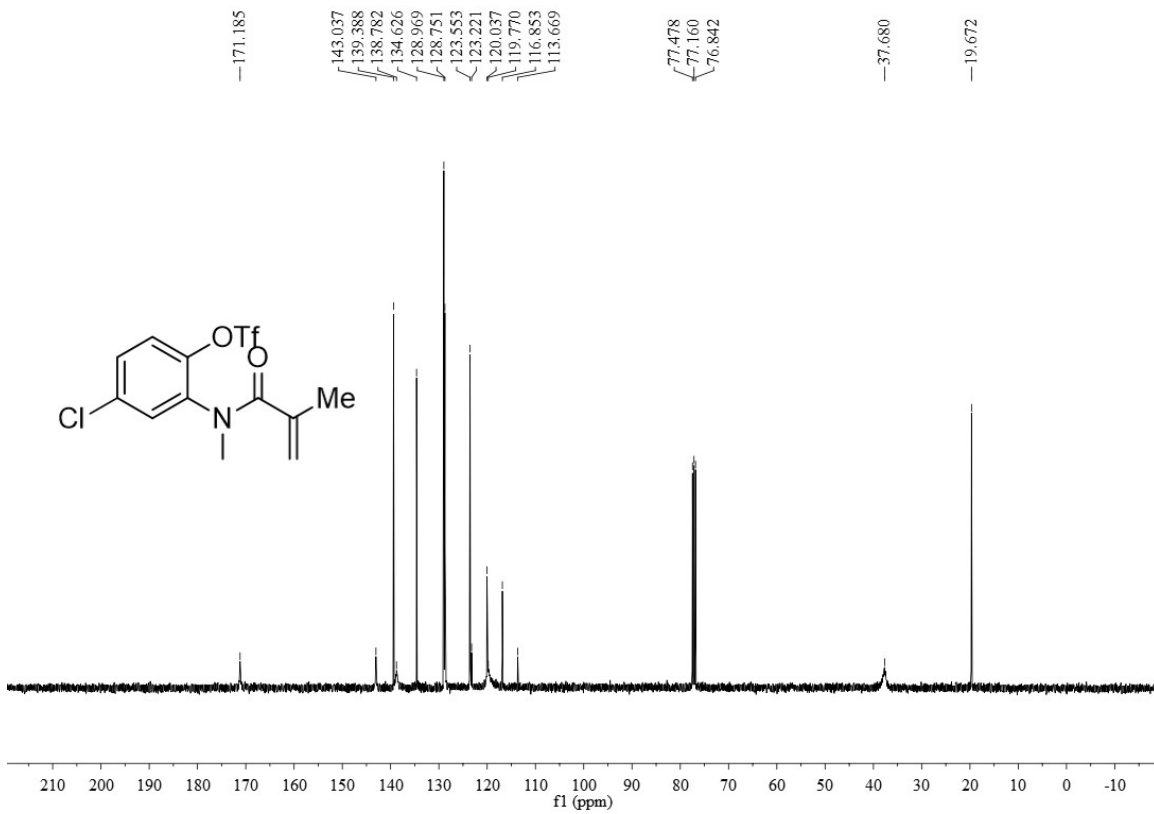

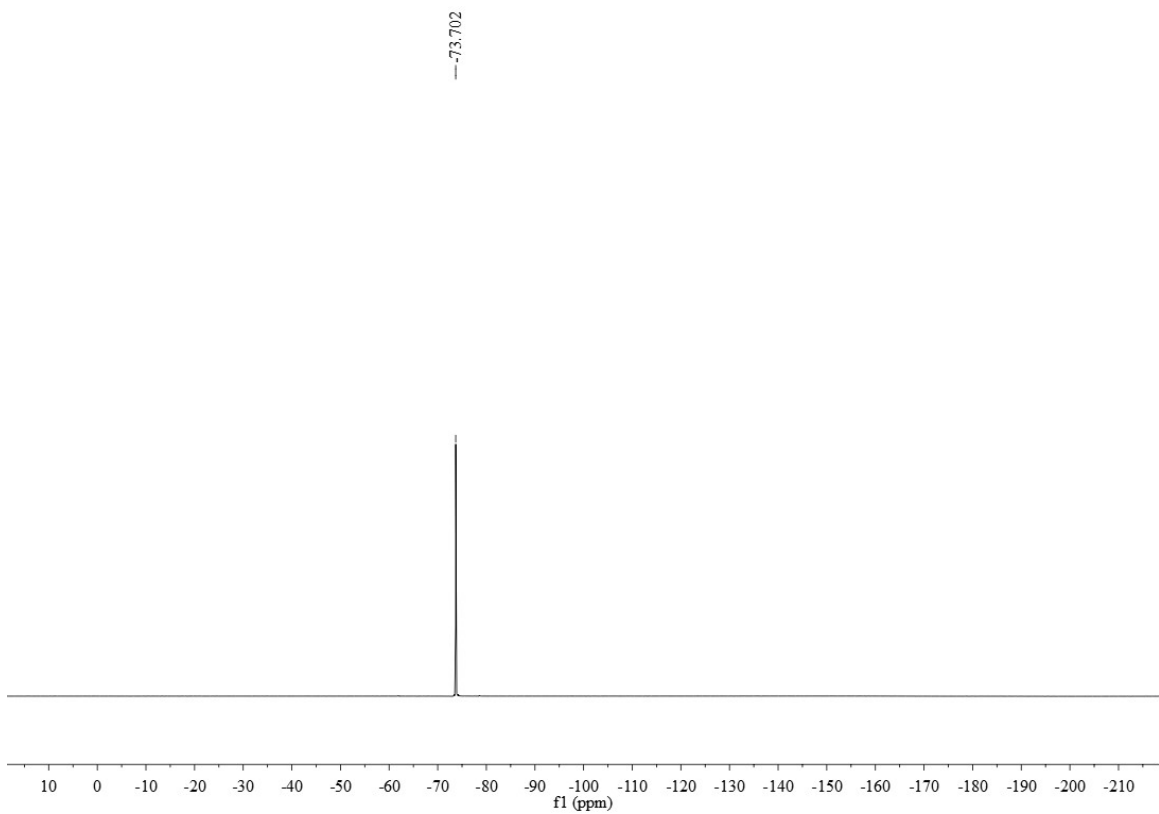

**1i**

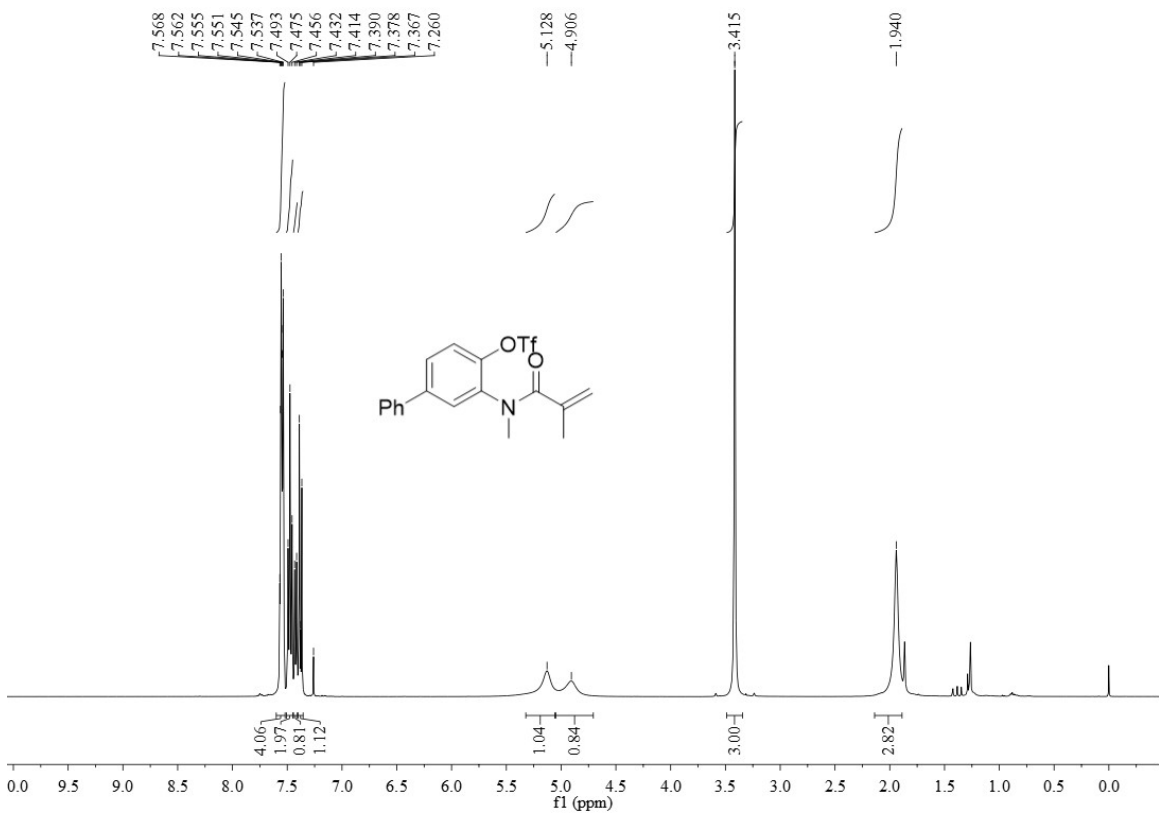

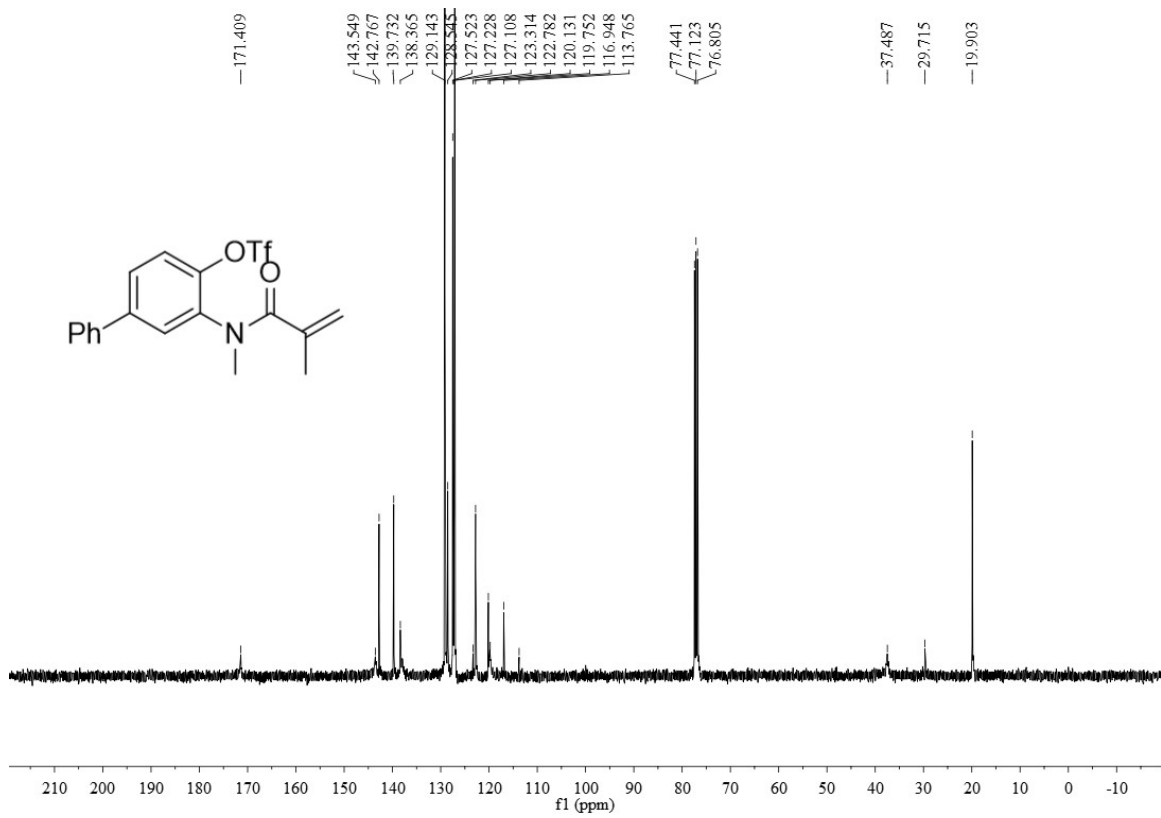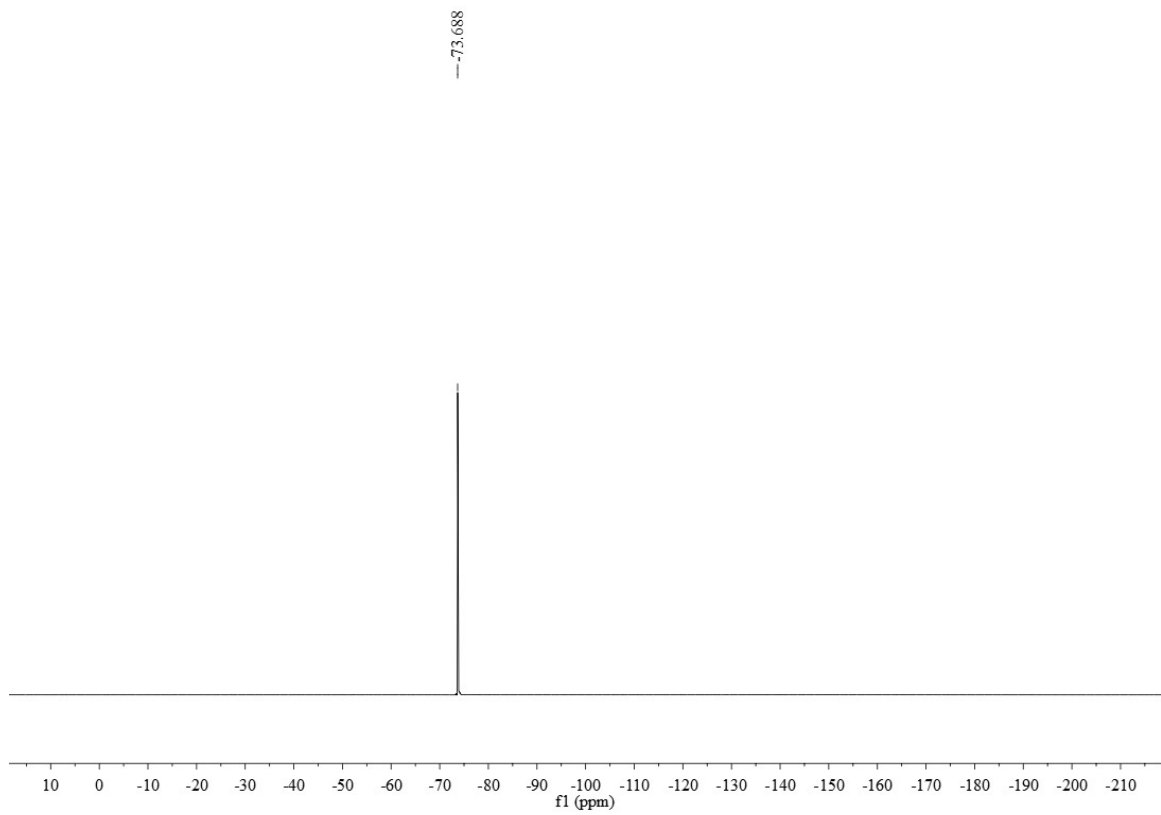

1j

czb-4-209

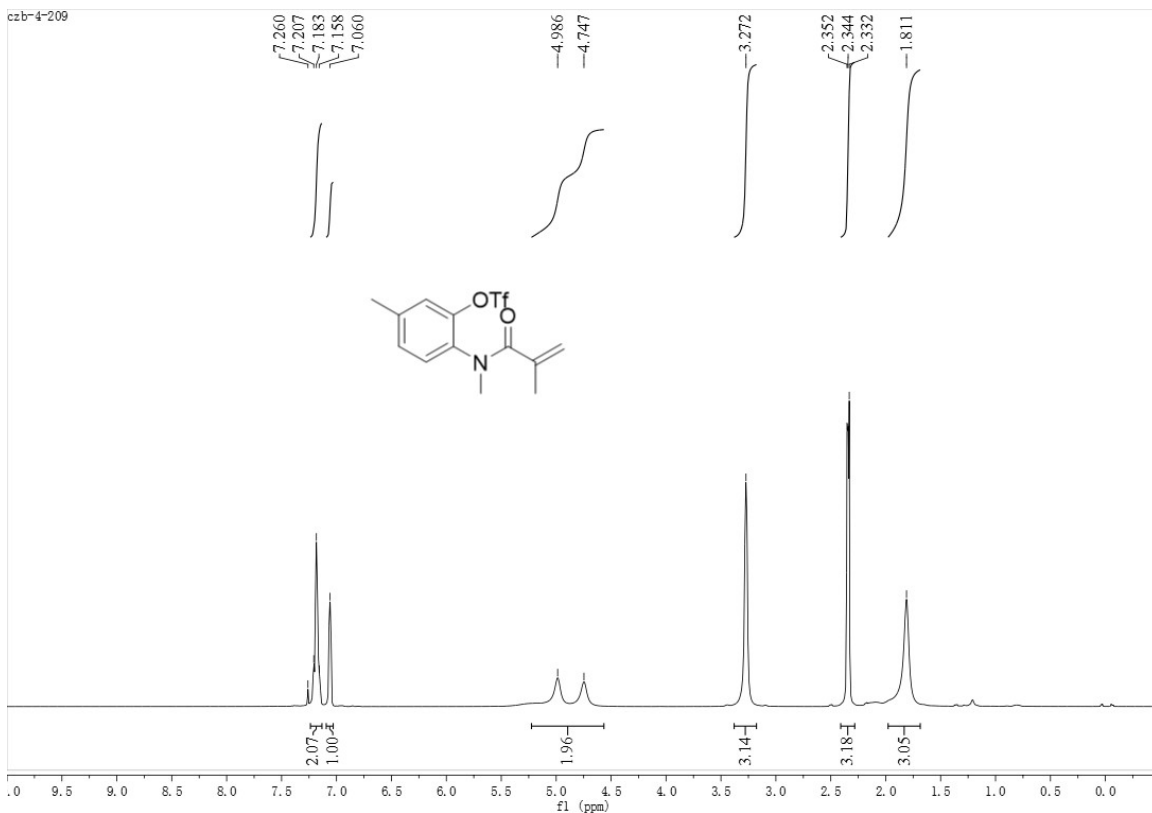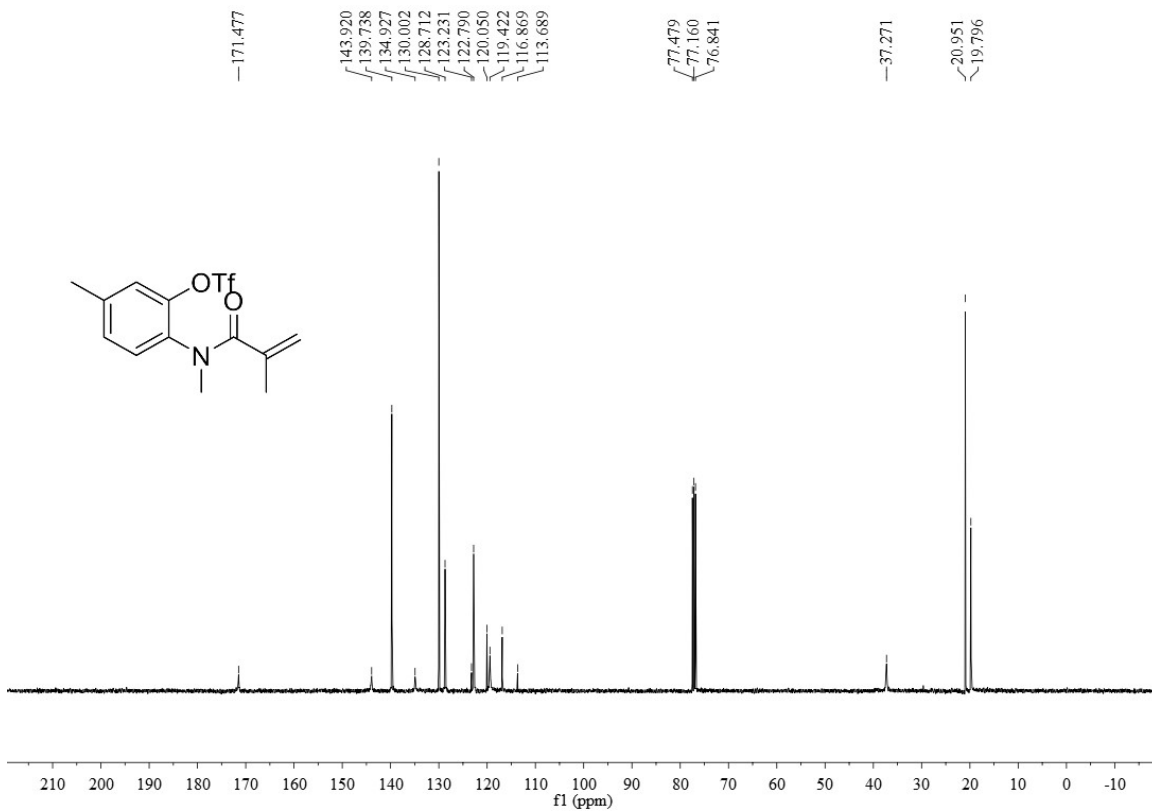

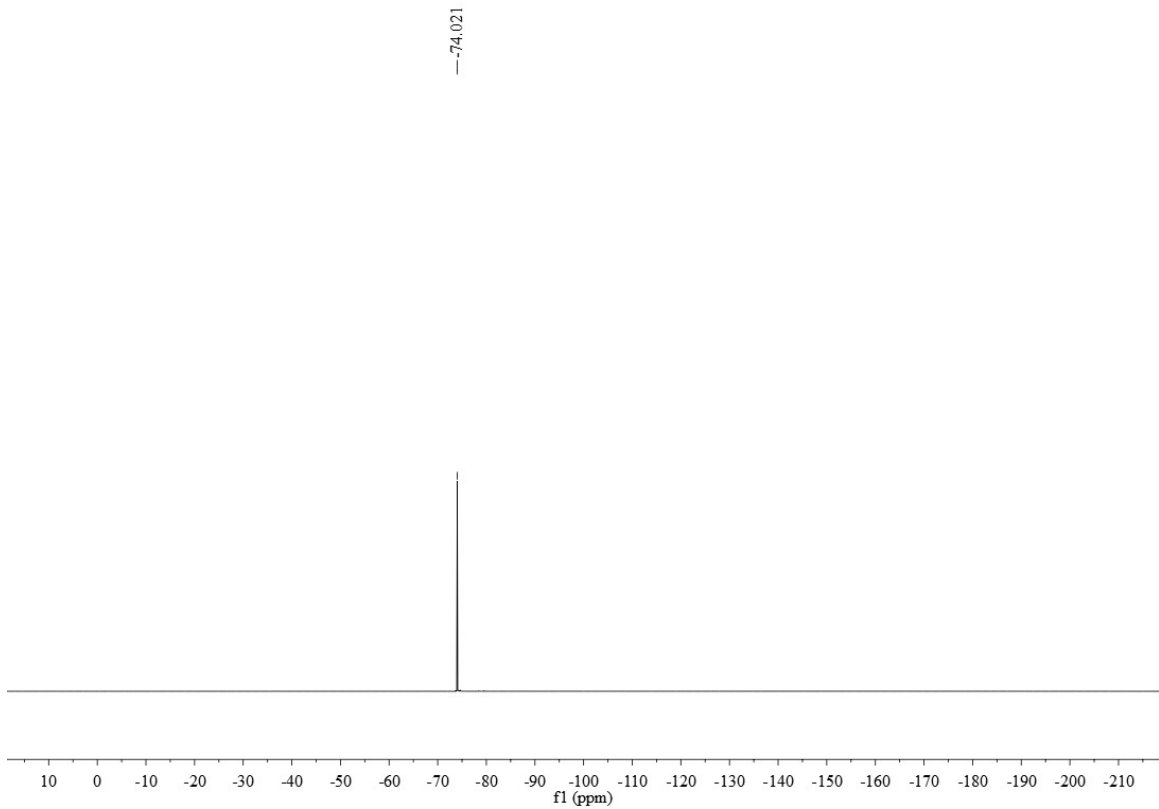

**1k**

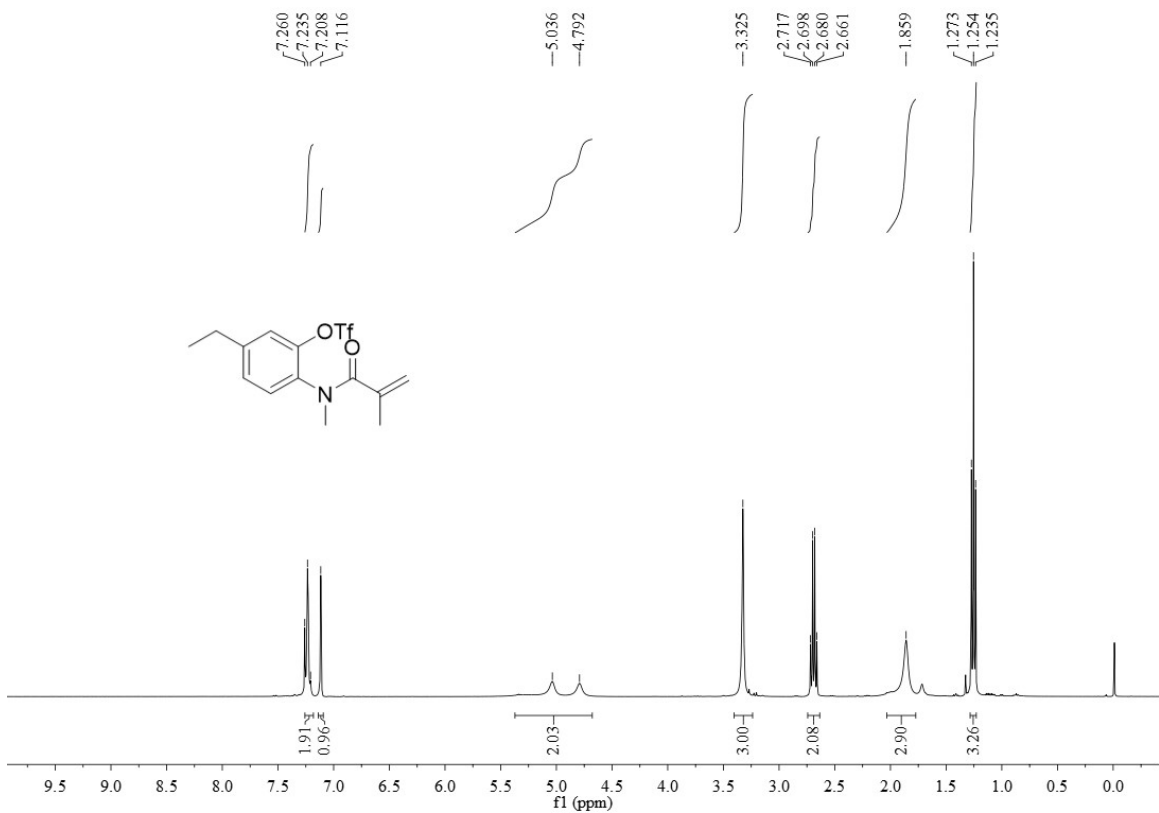

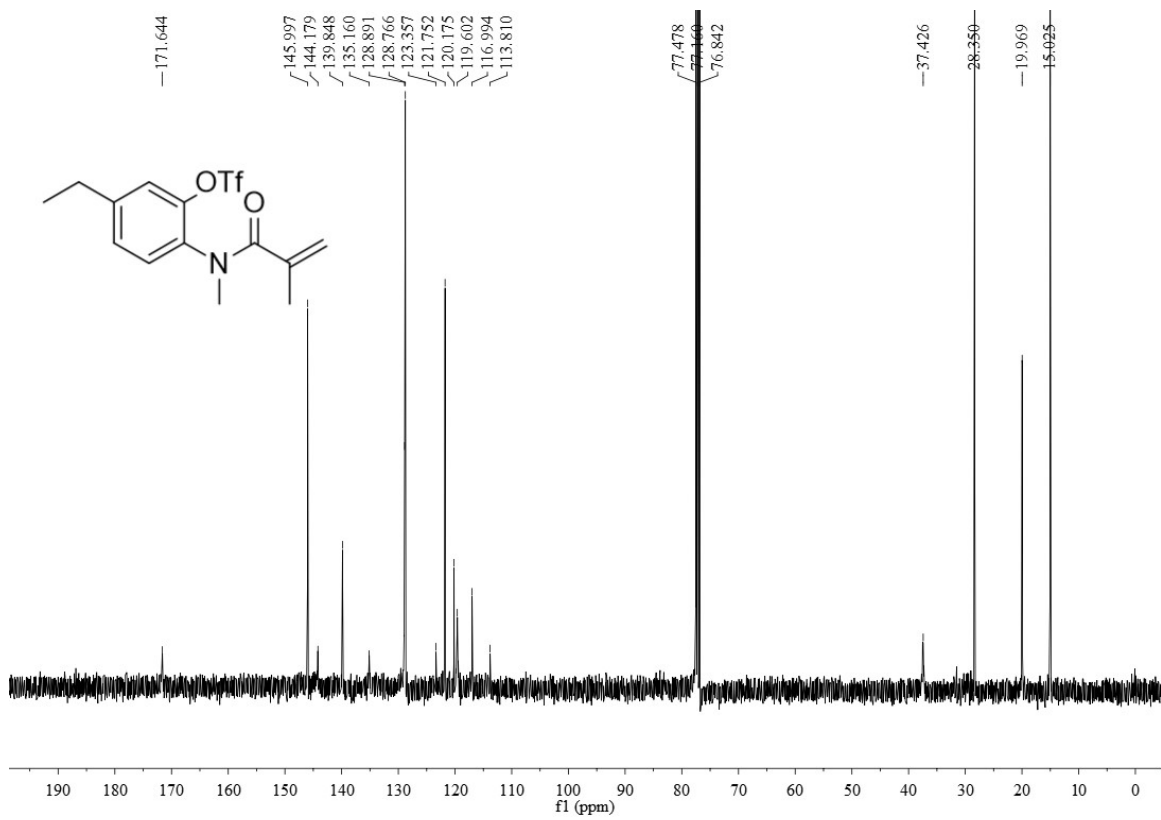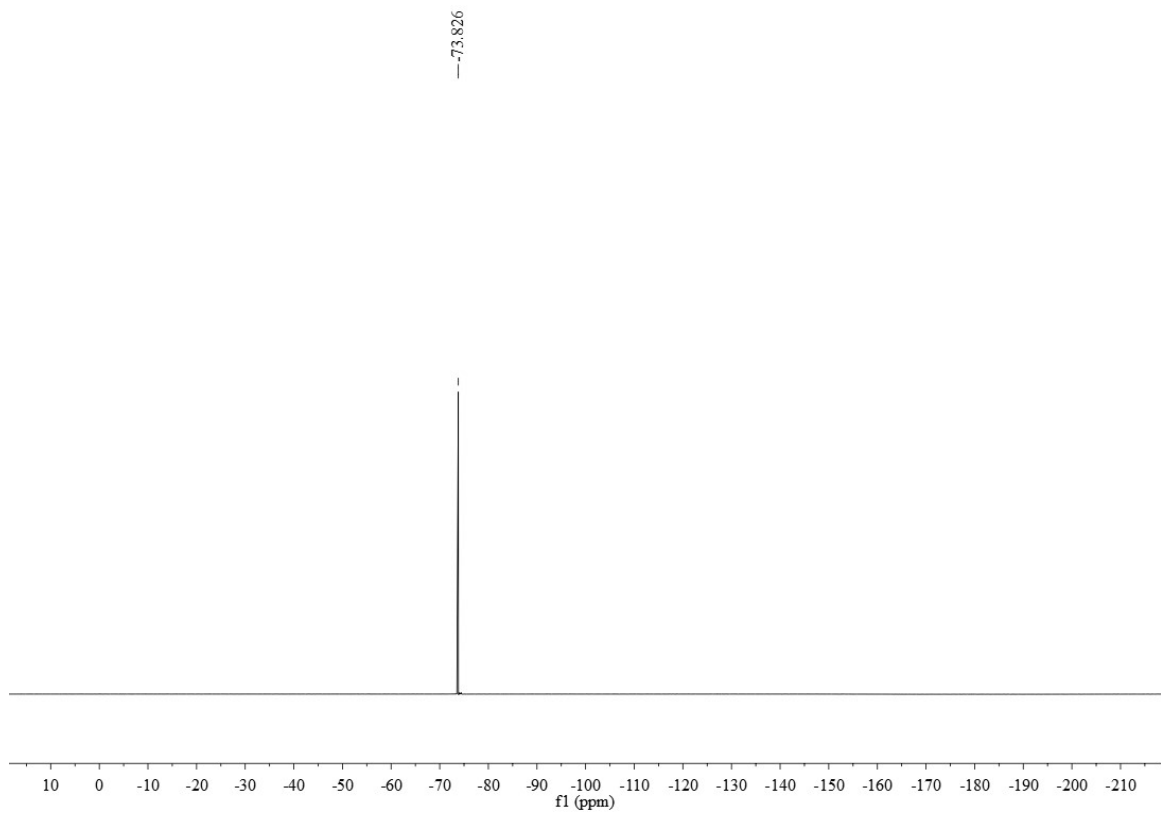

11

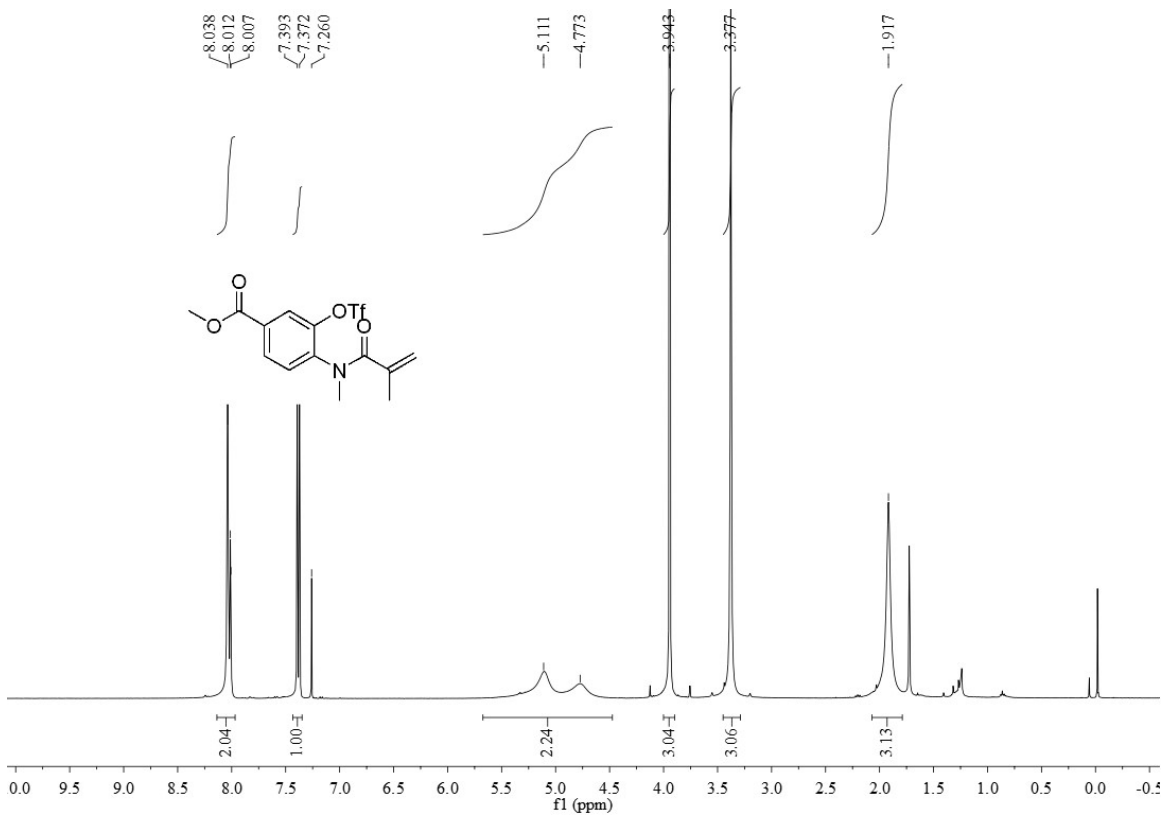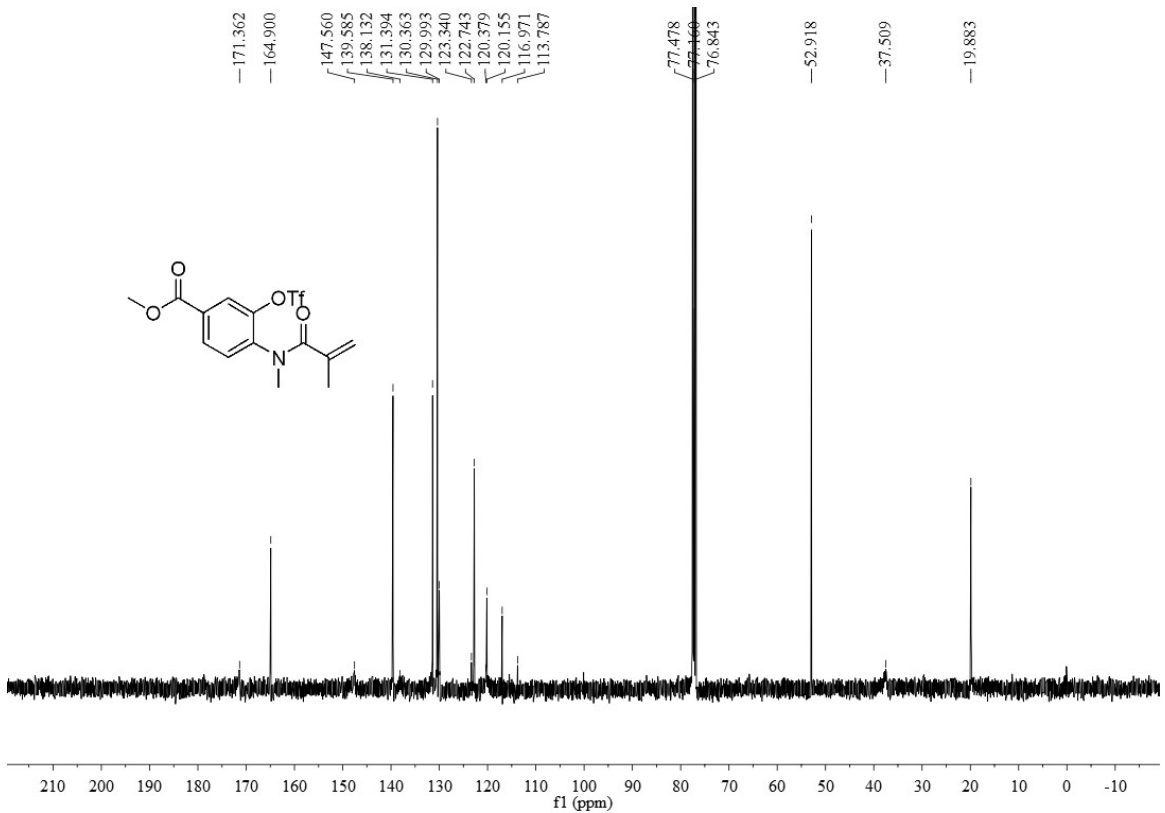

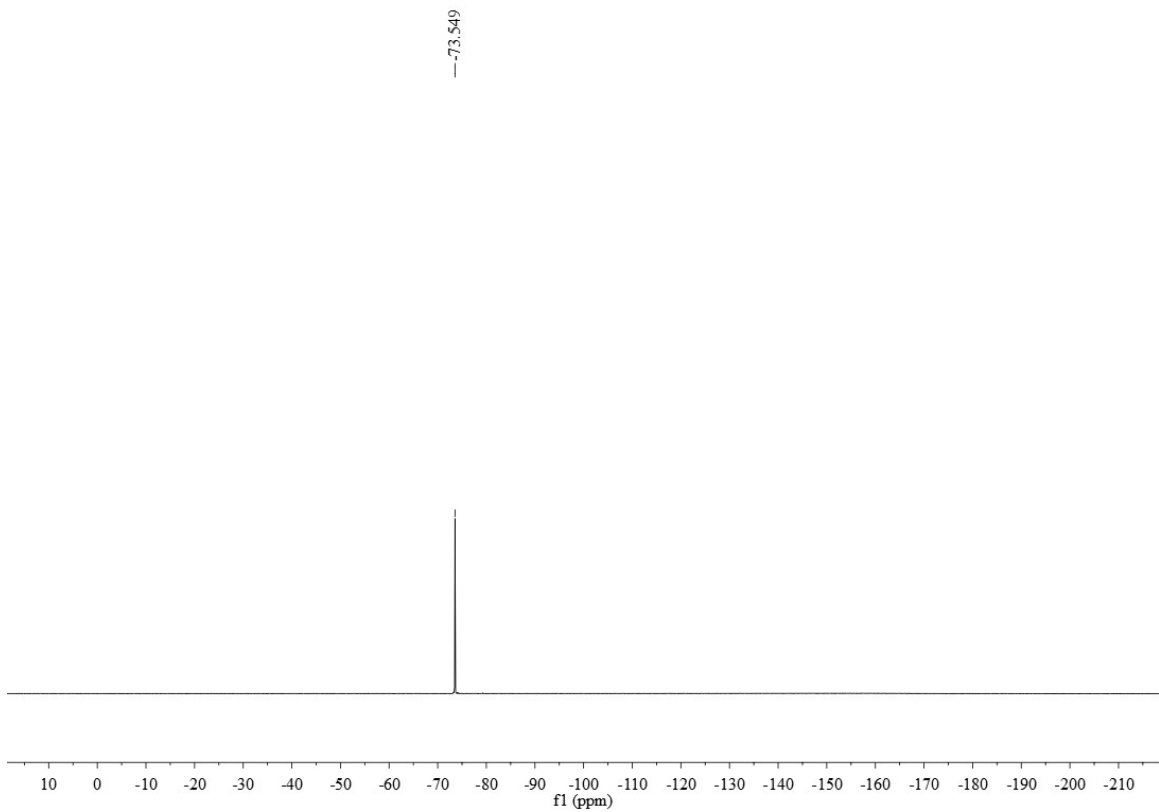

**1m**

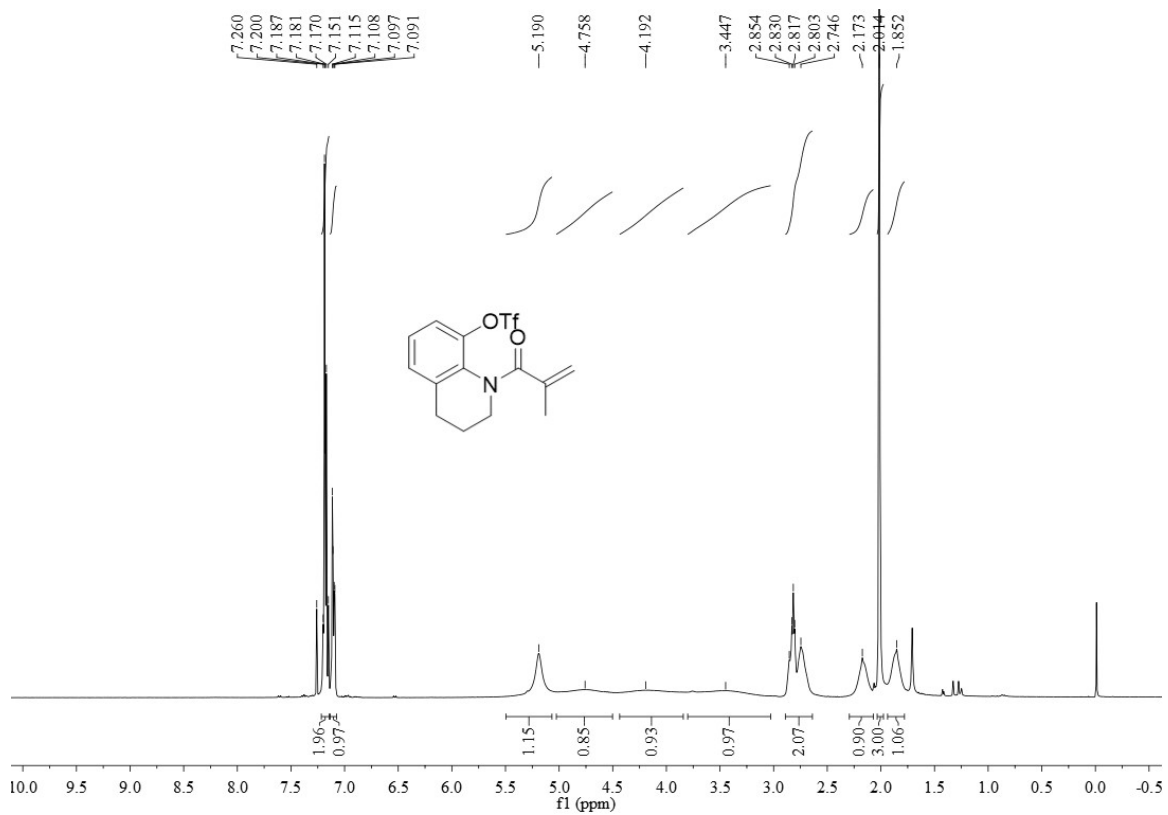



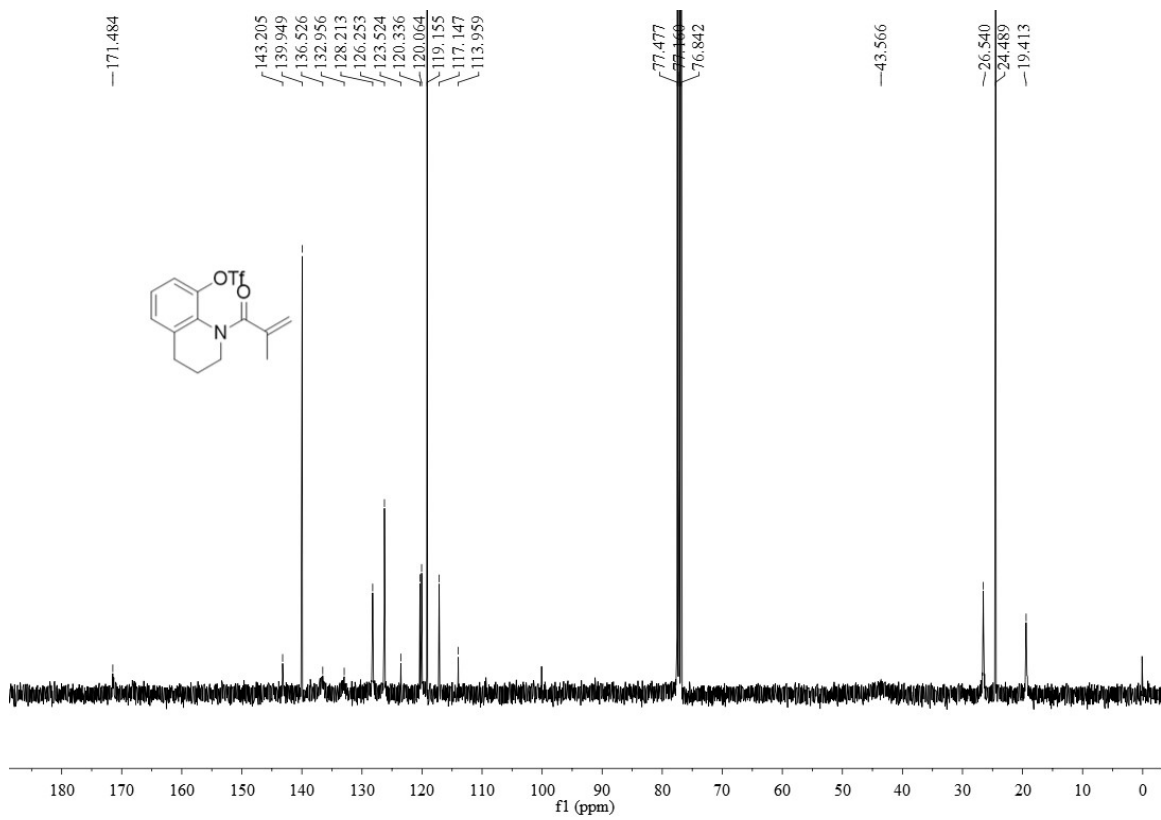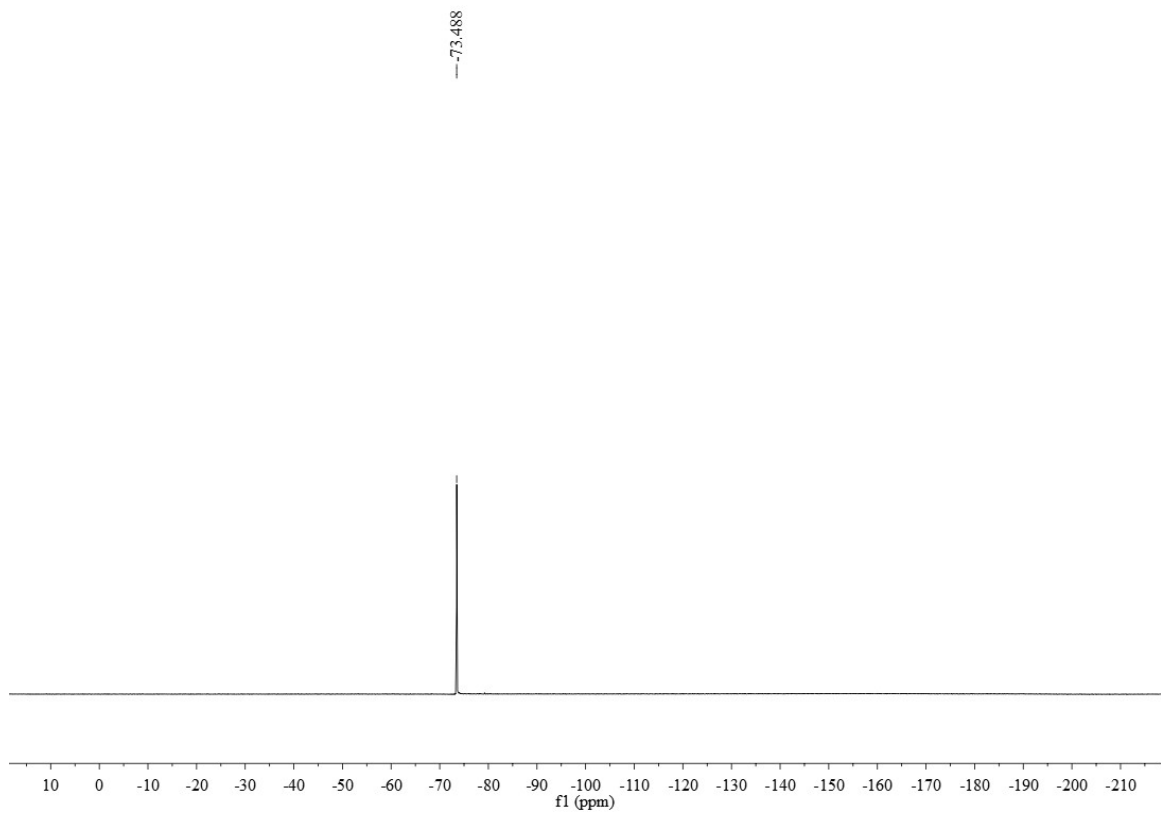

1n

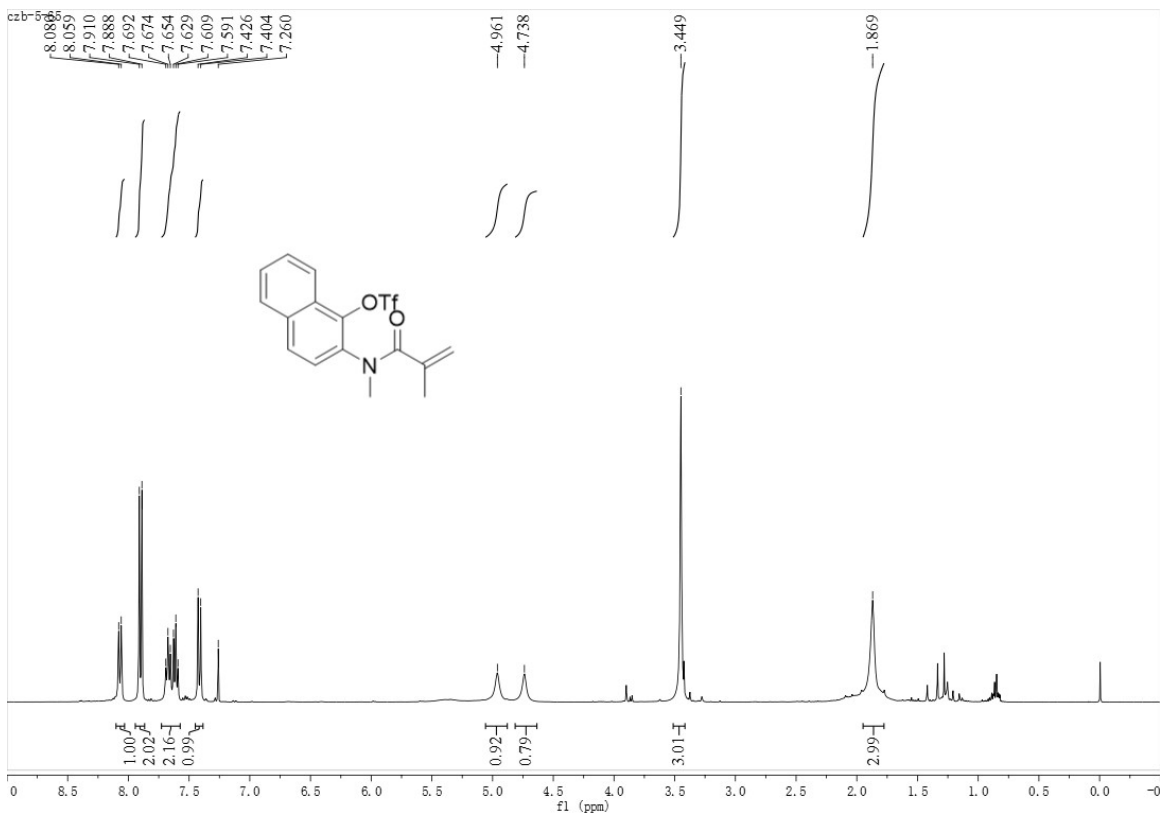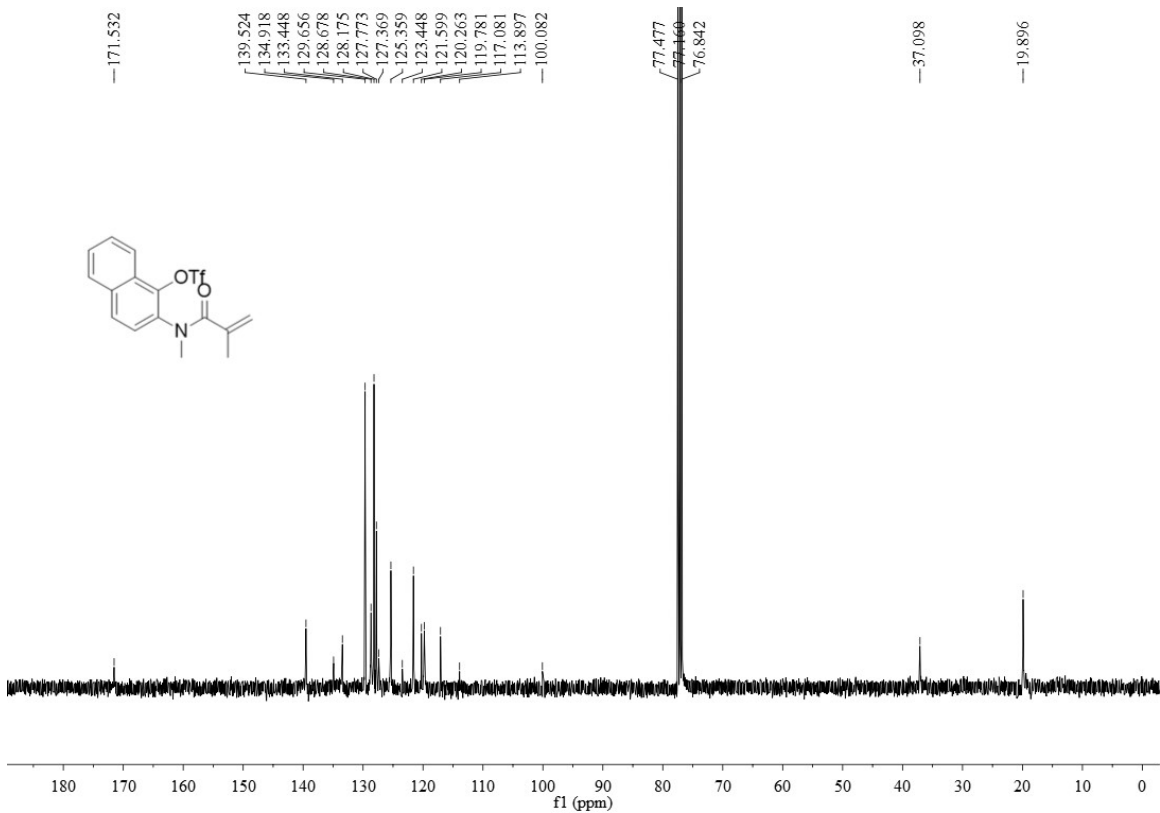

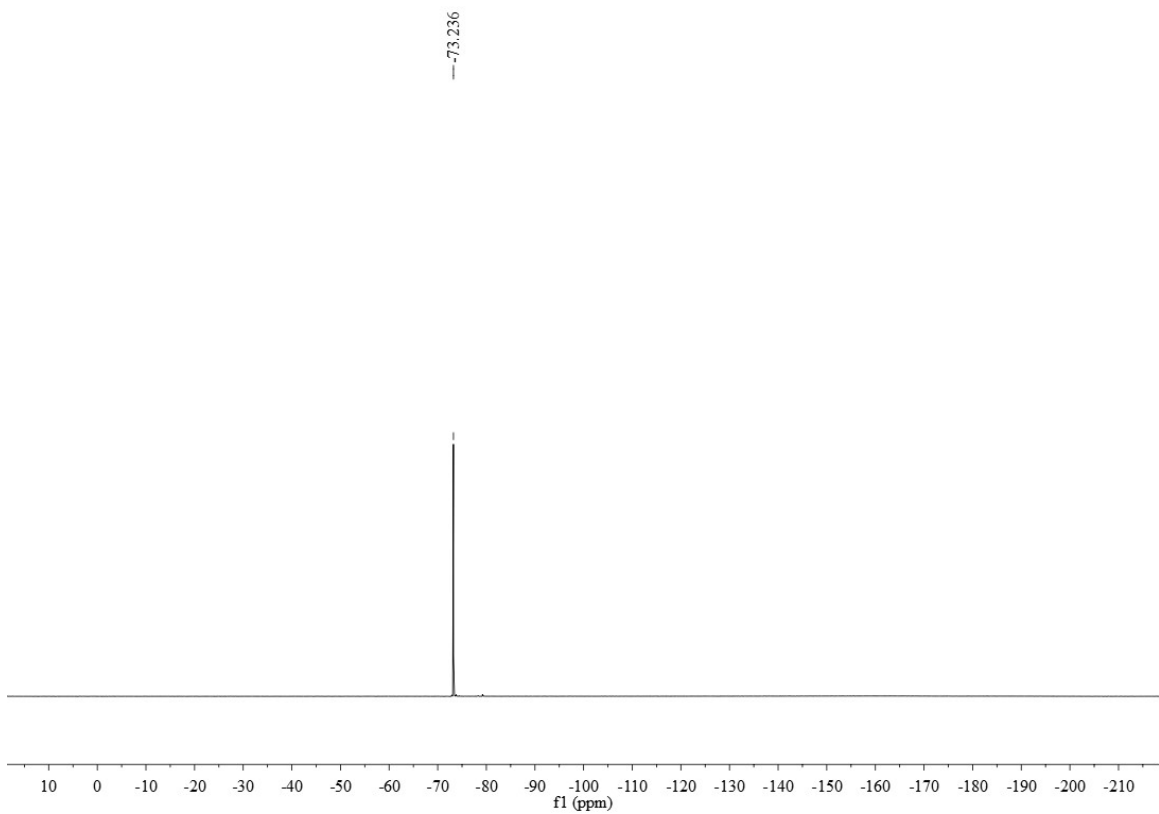

**1o**

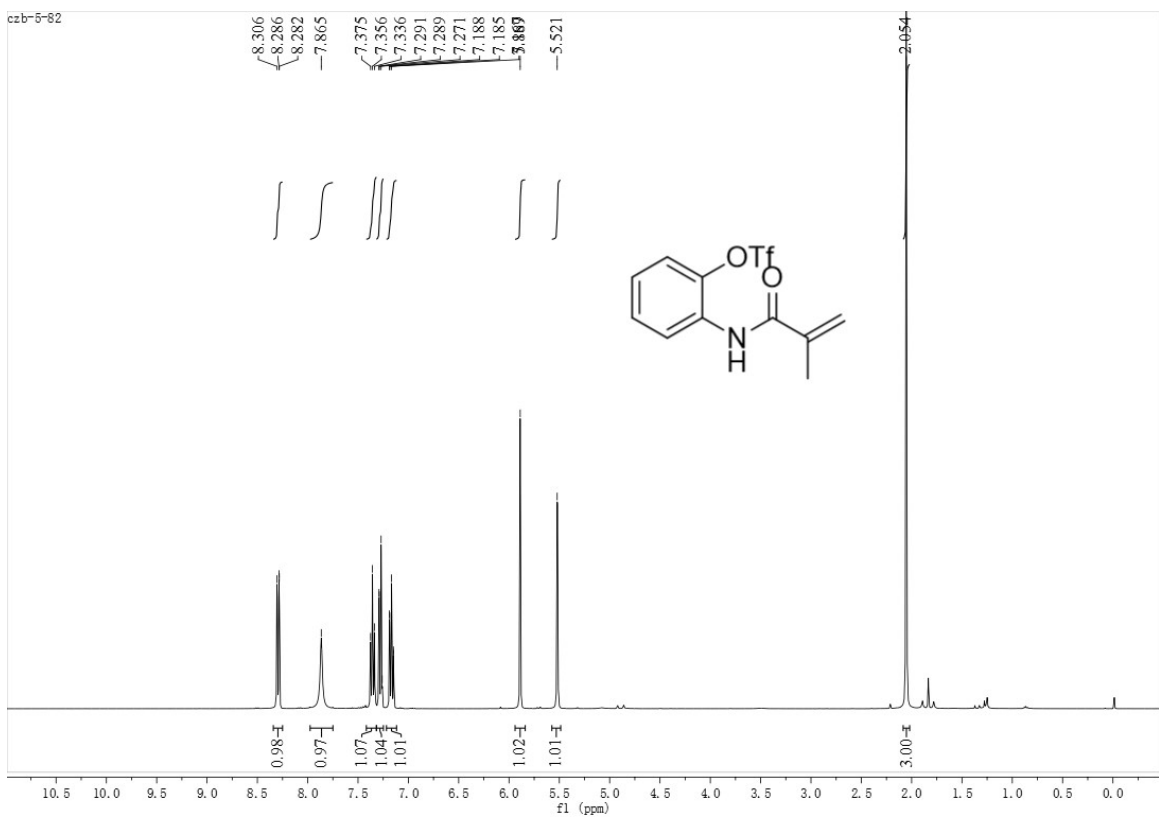

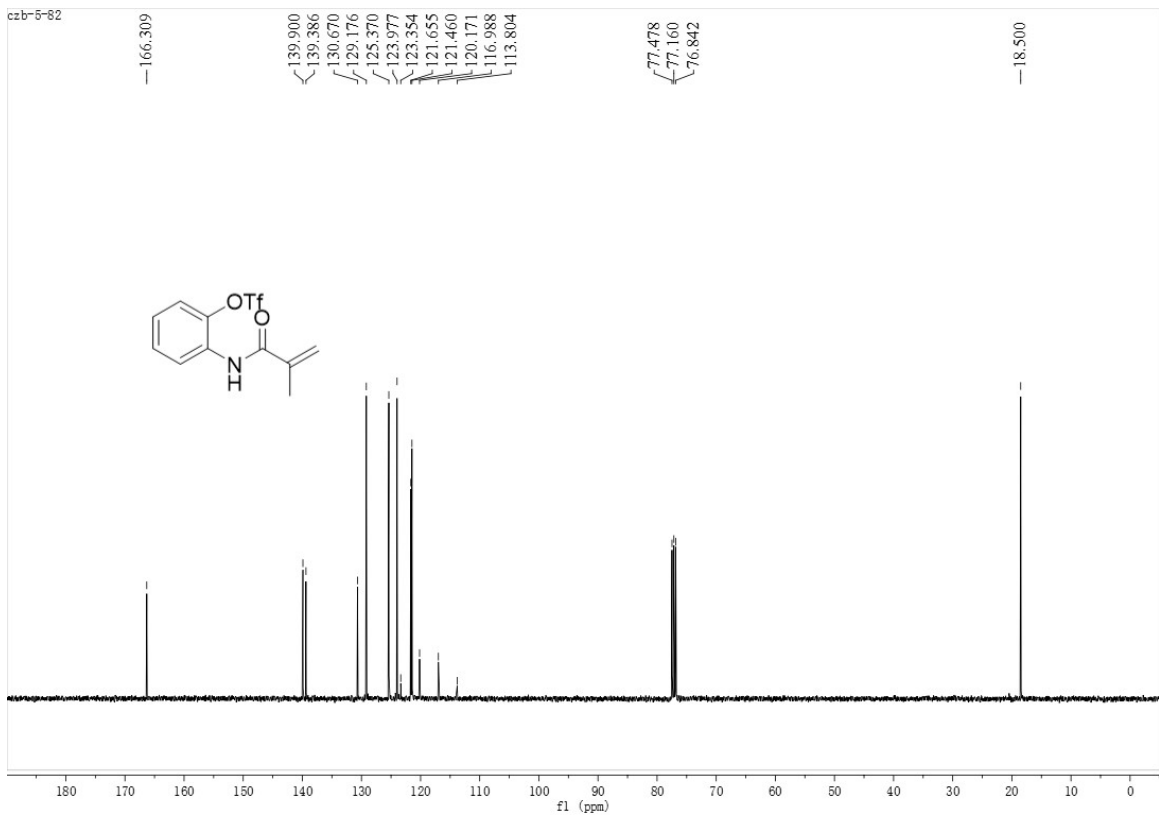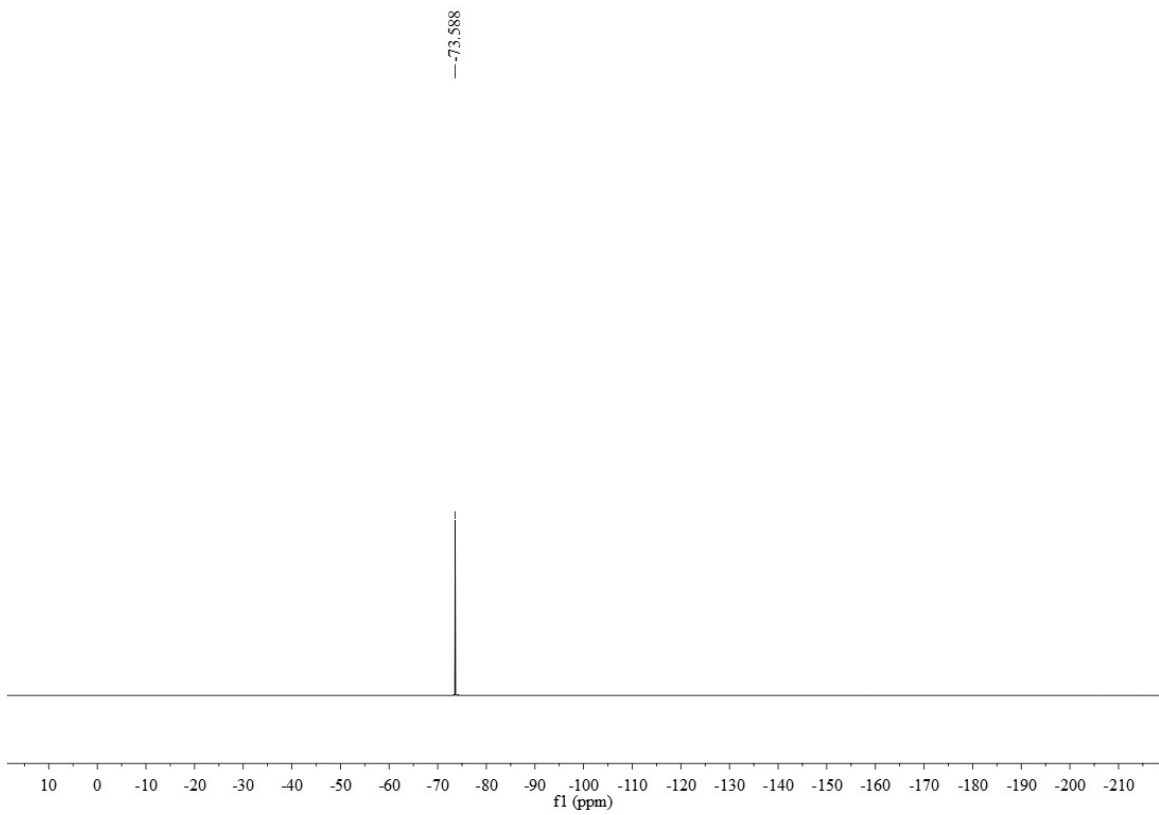

1p

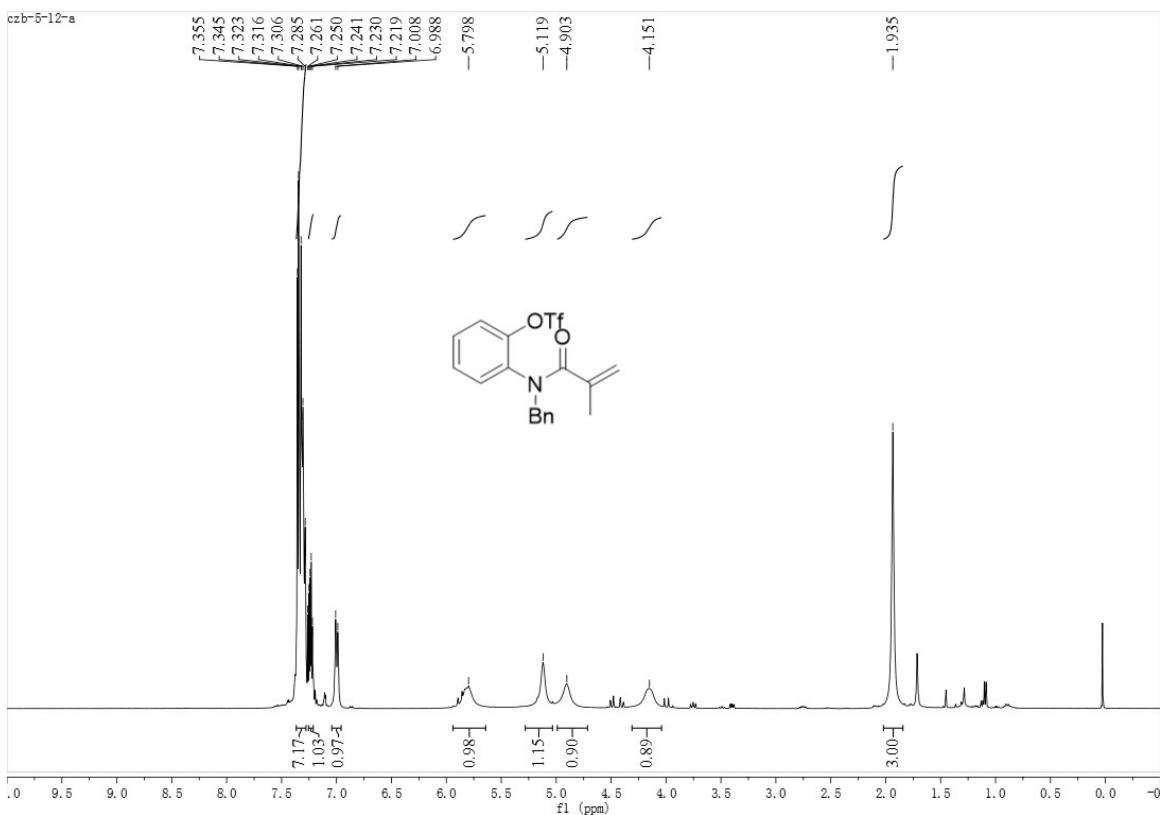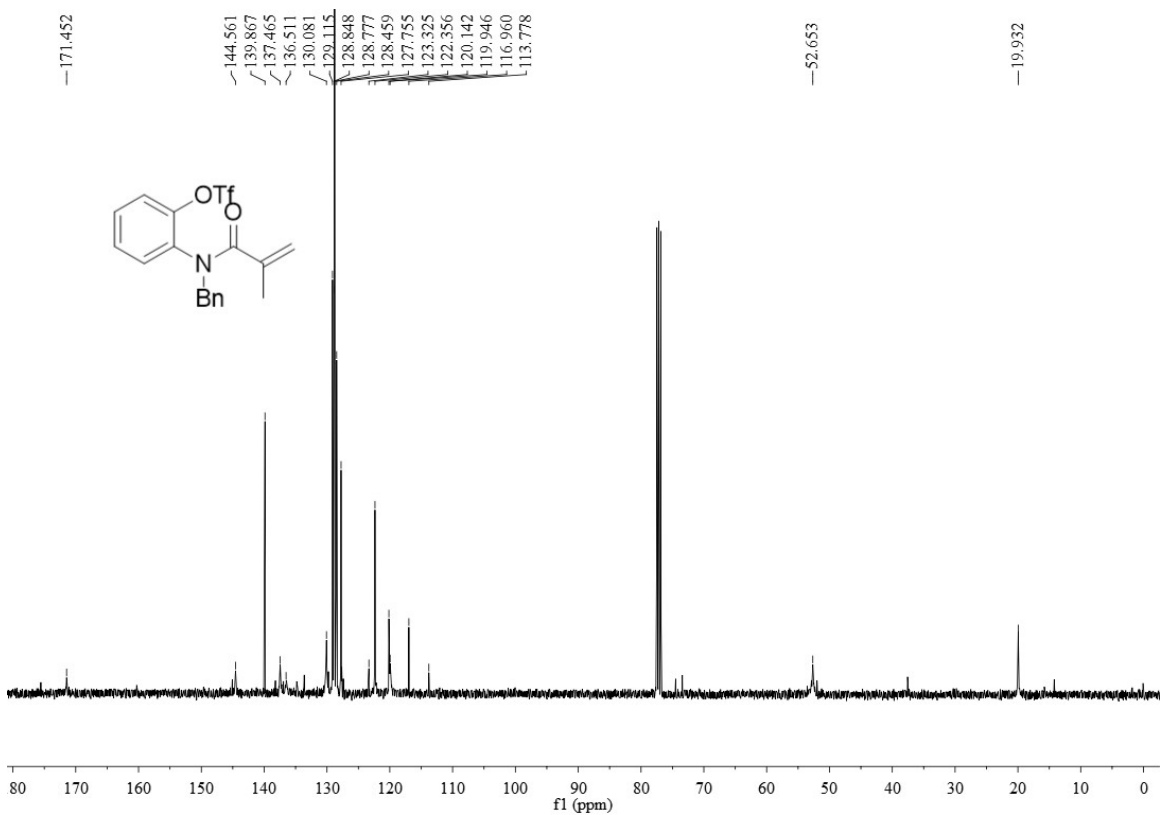

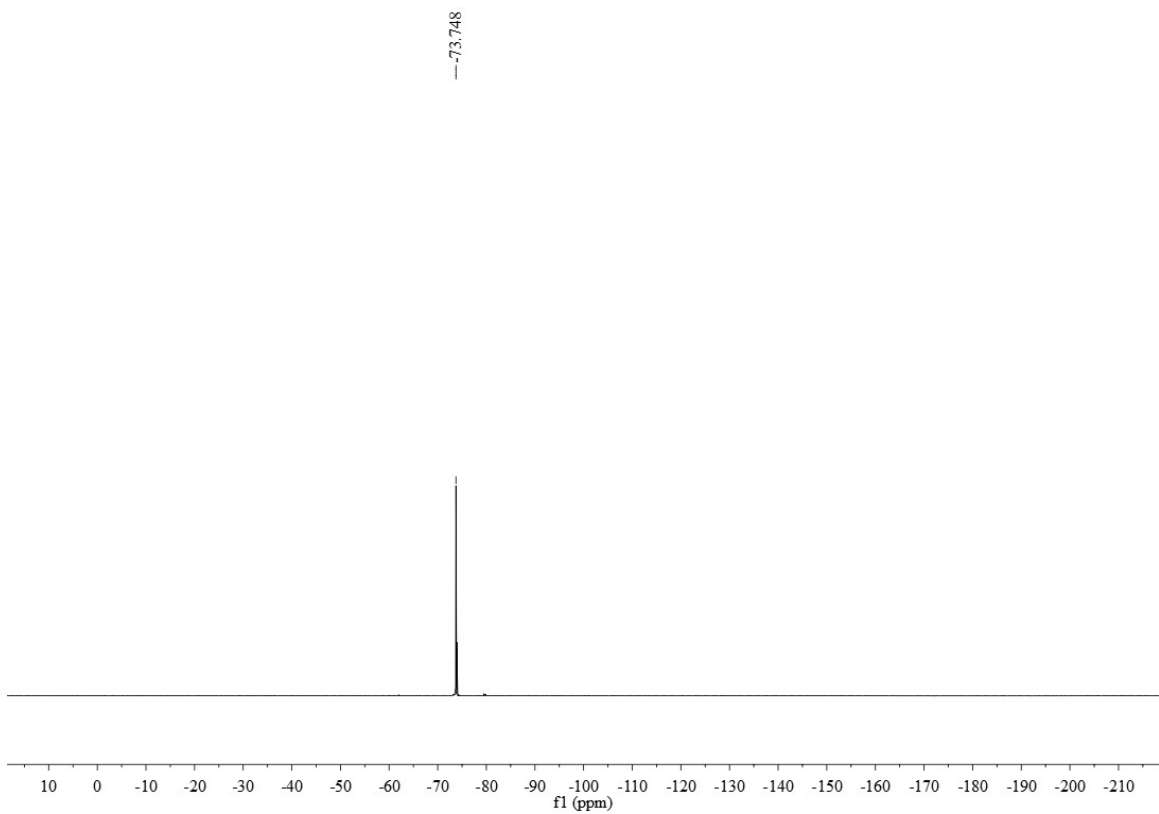

**1q**

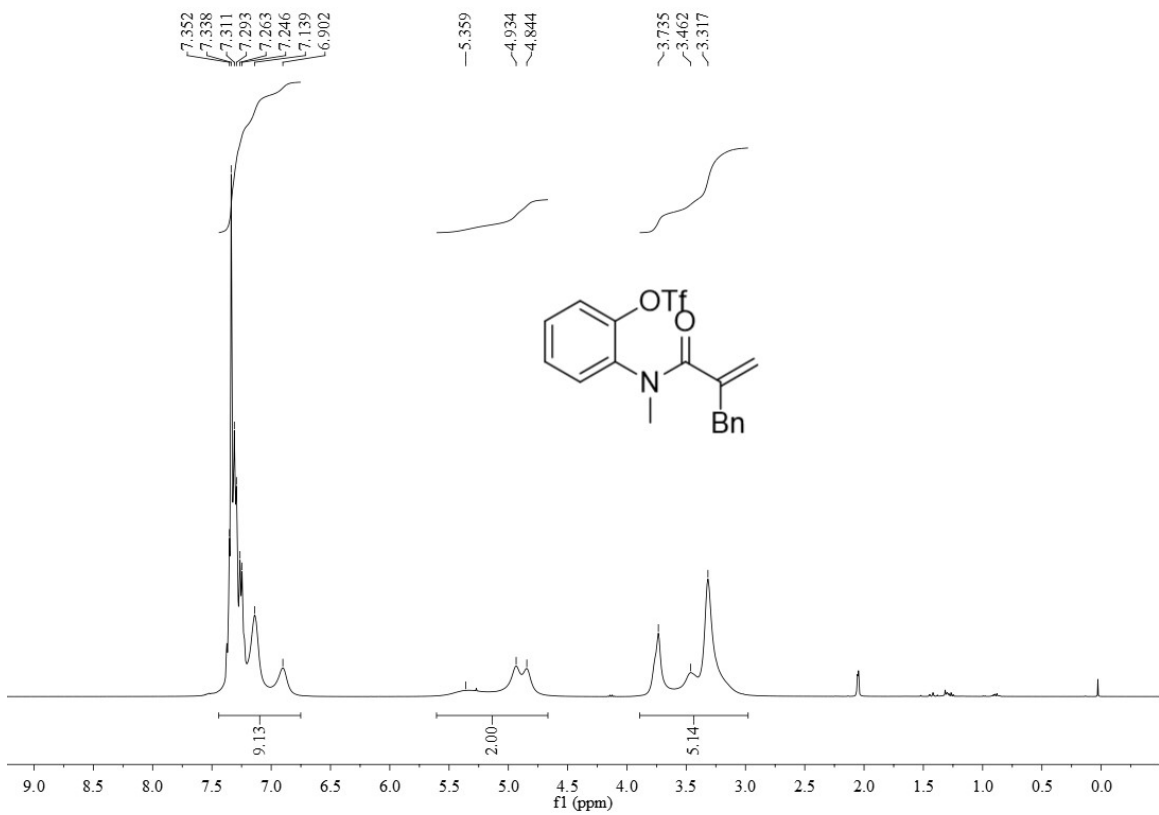

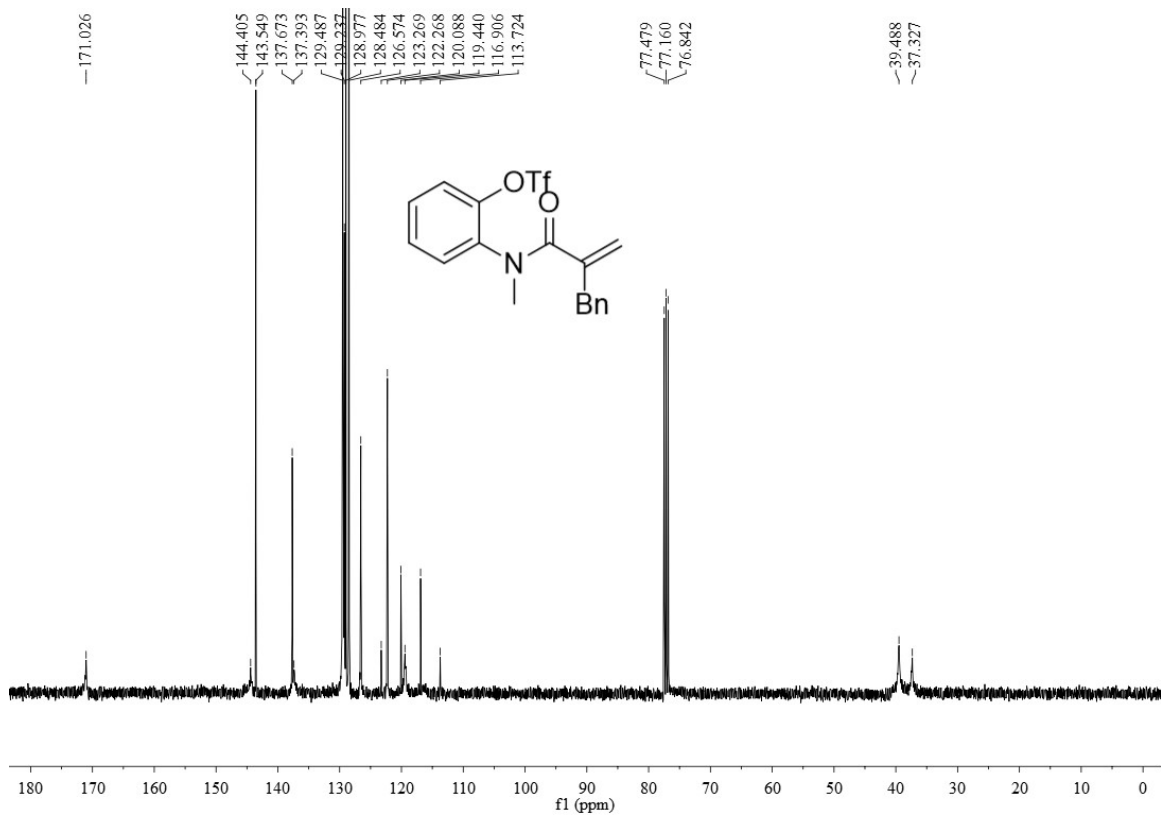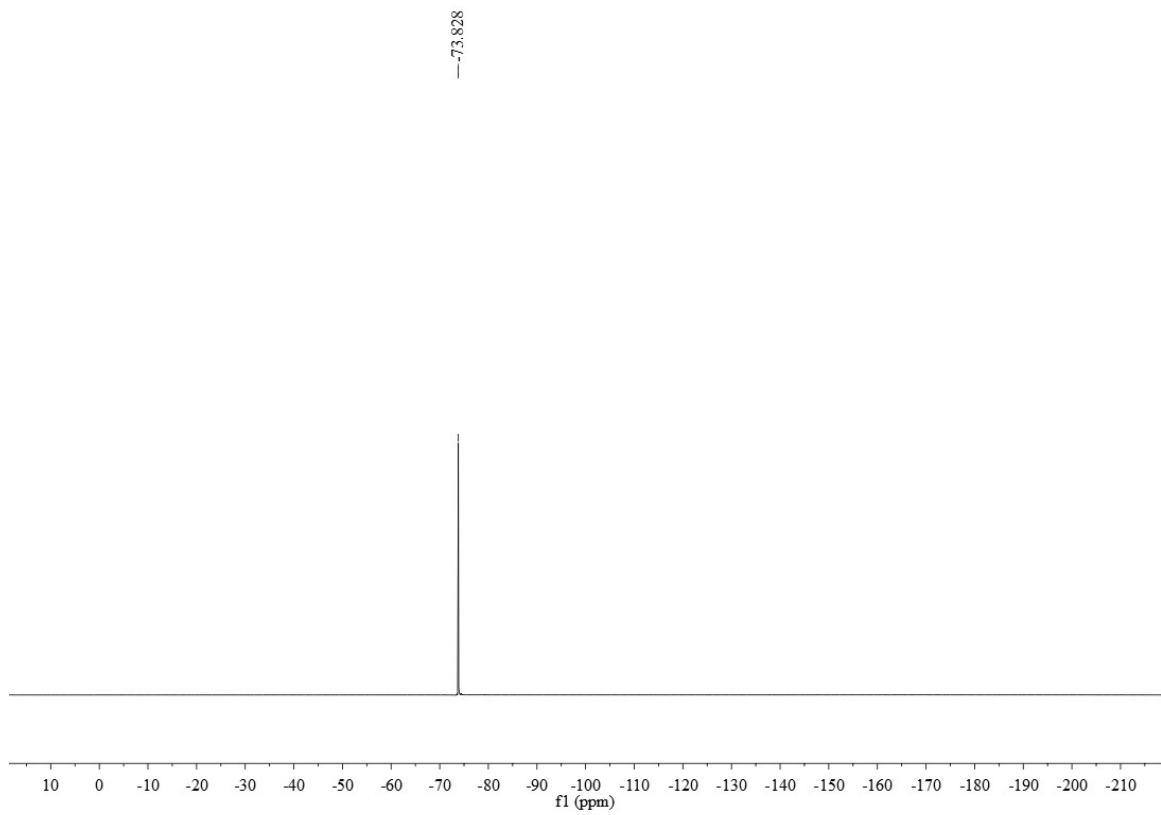

1r

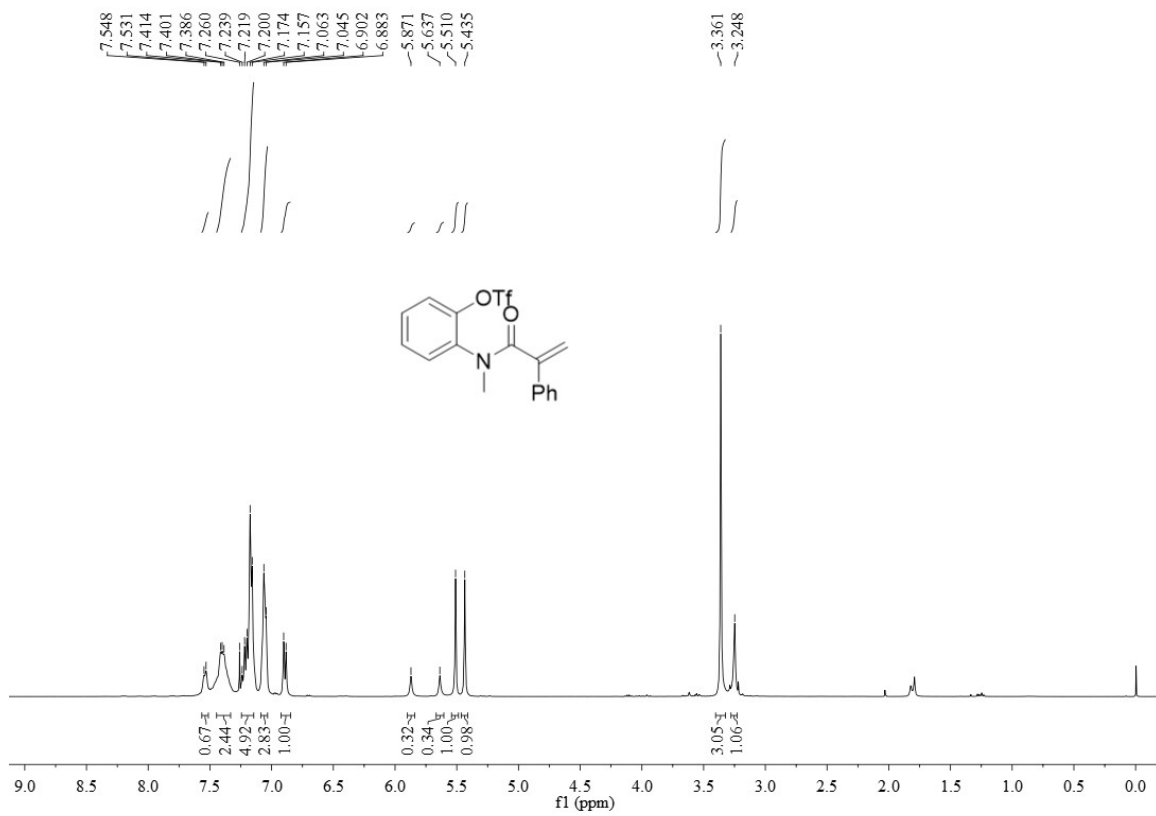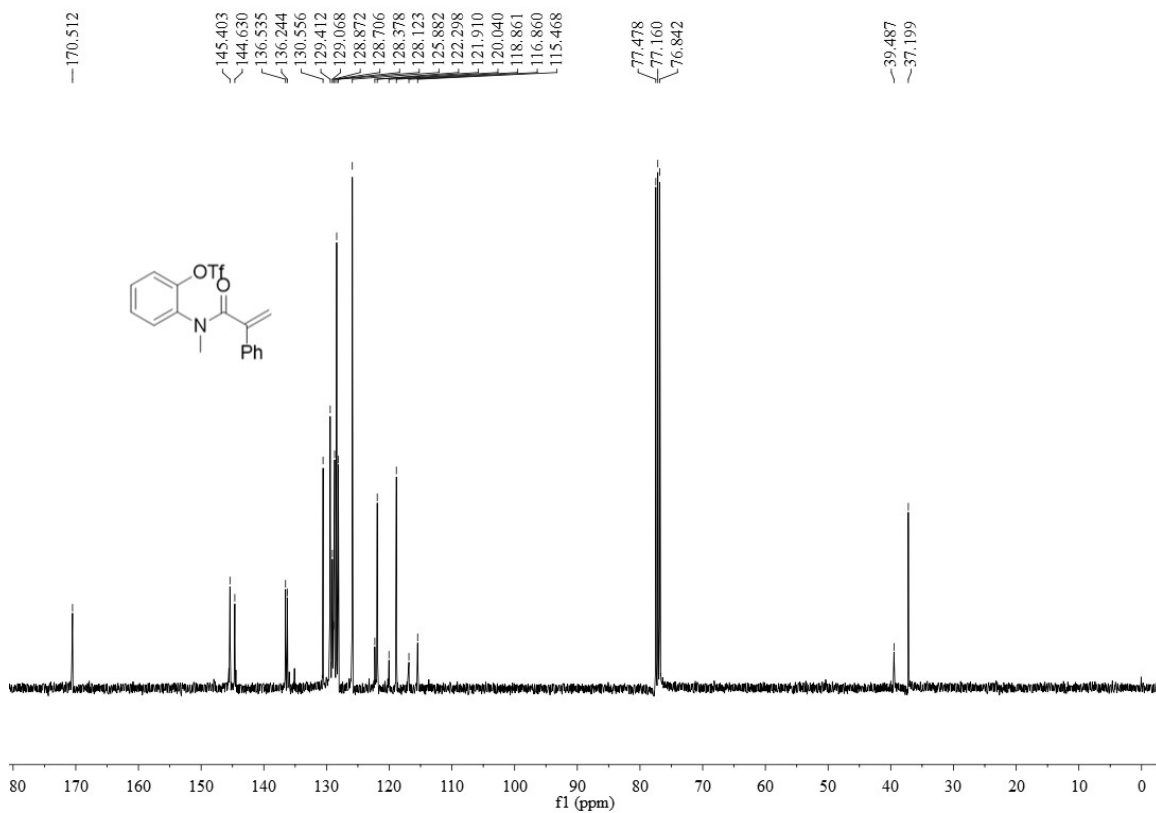



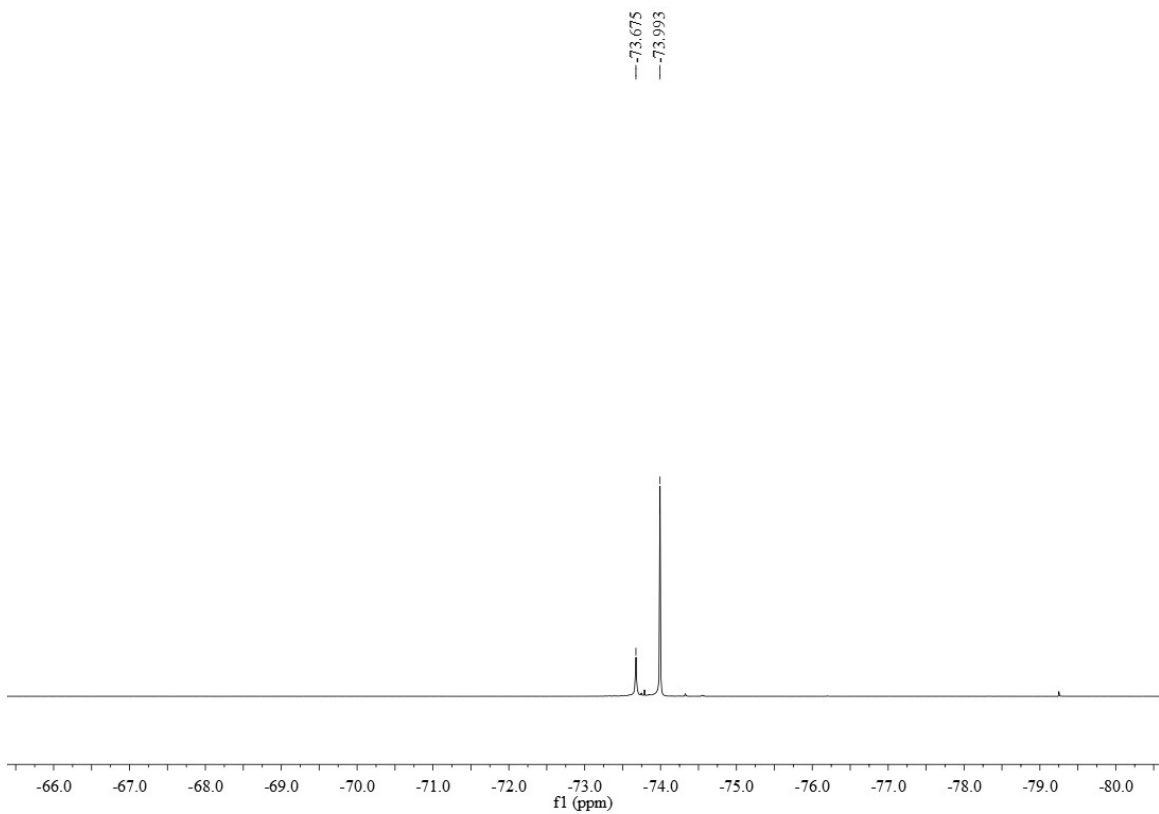

**1s**

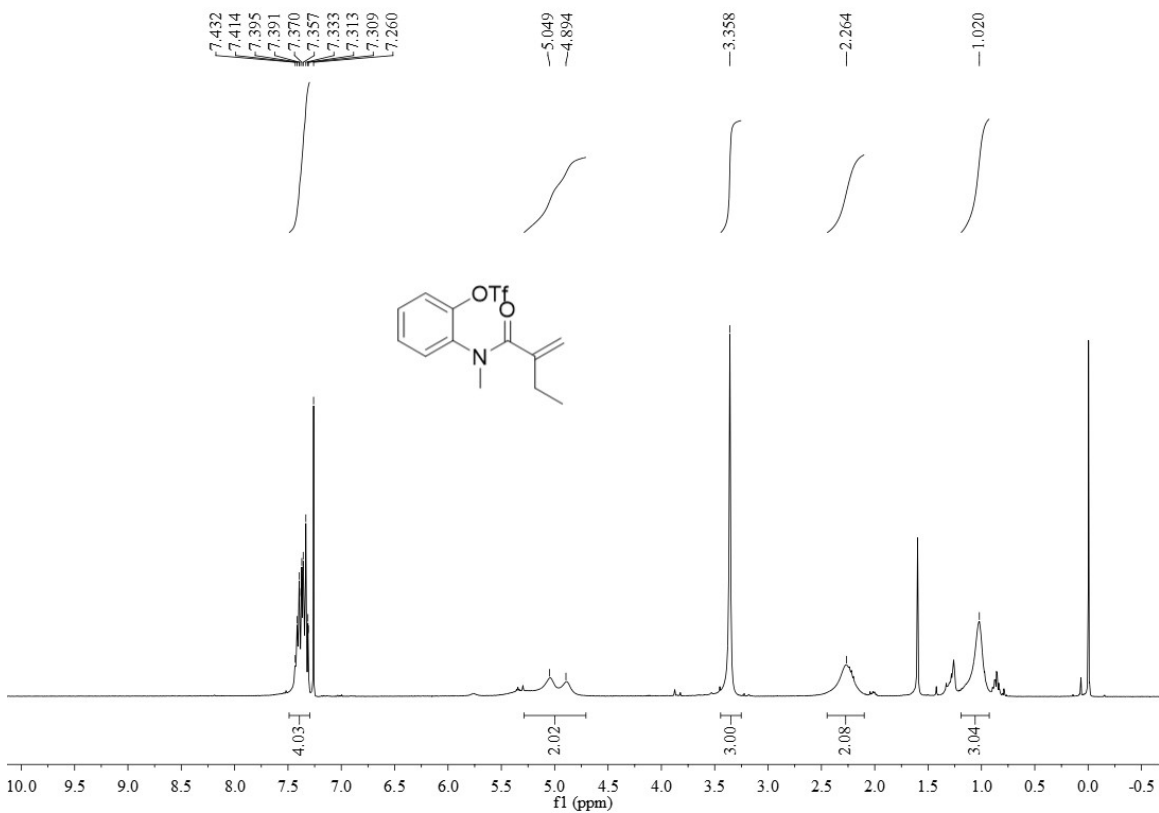

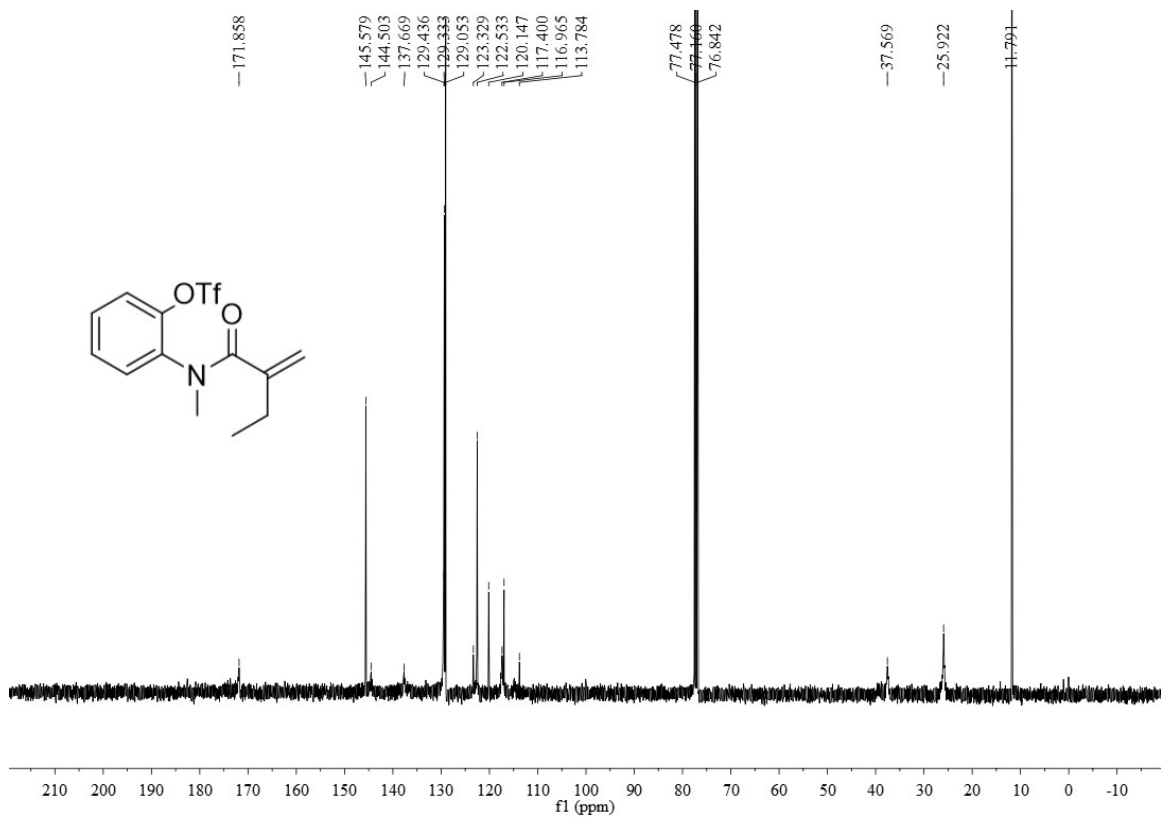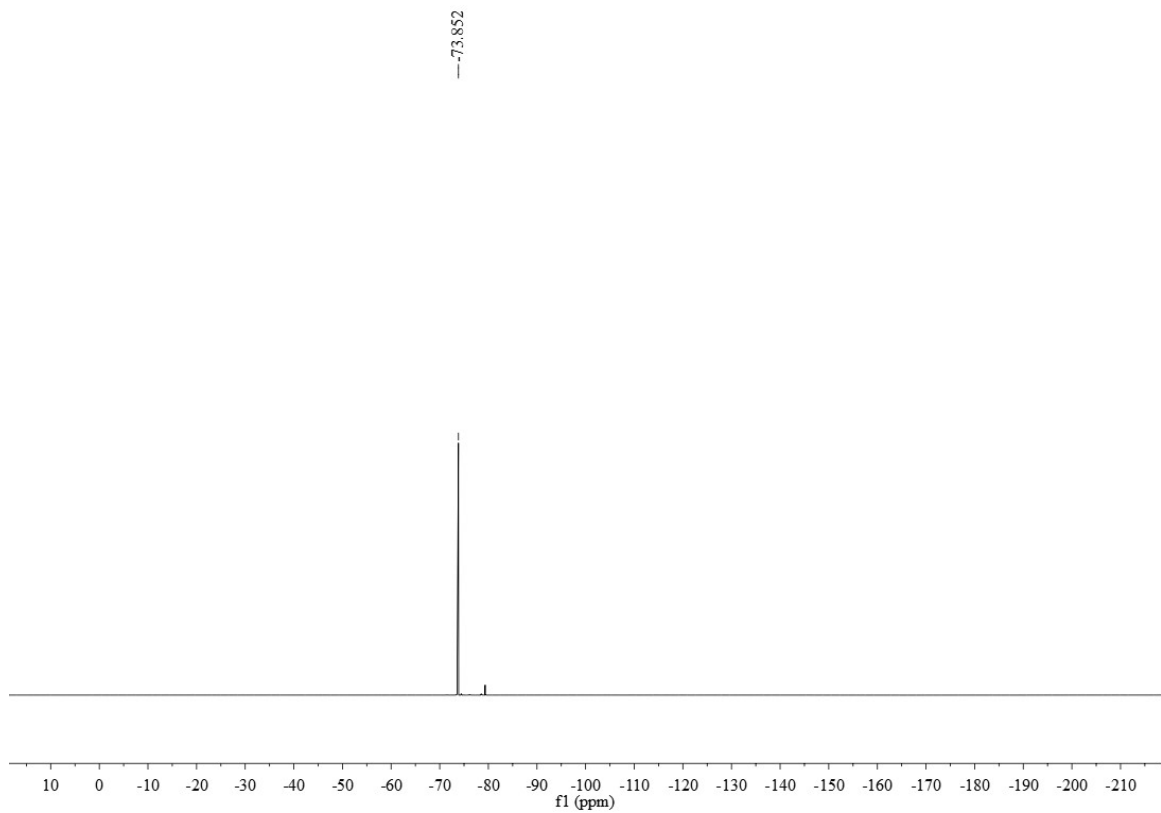

1t

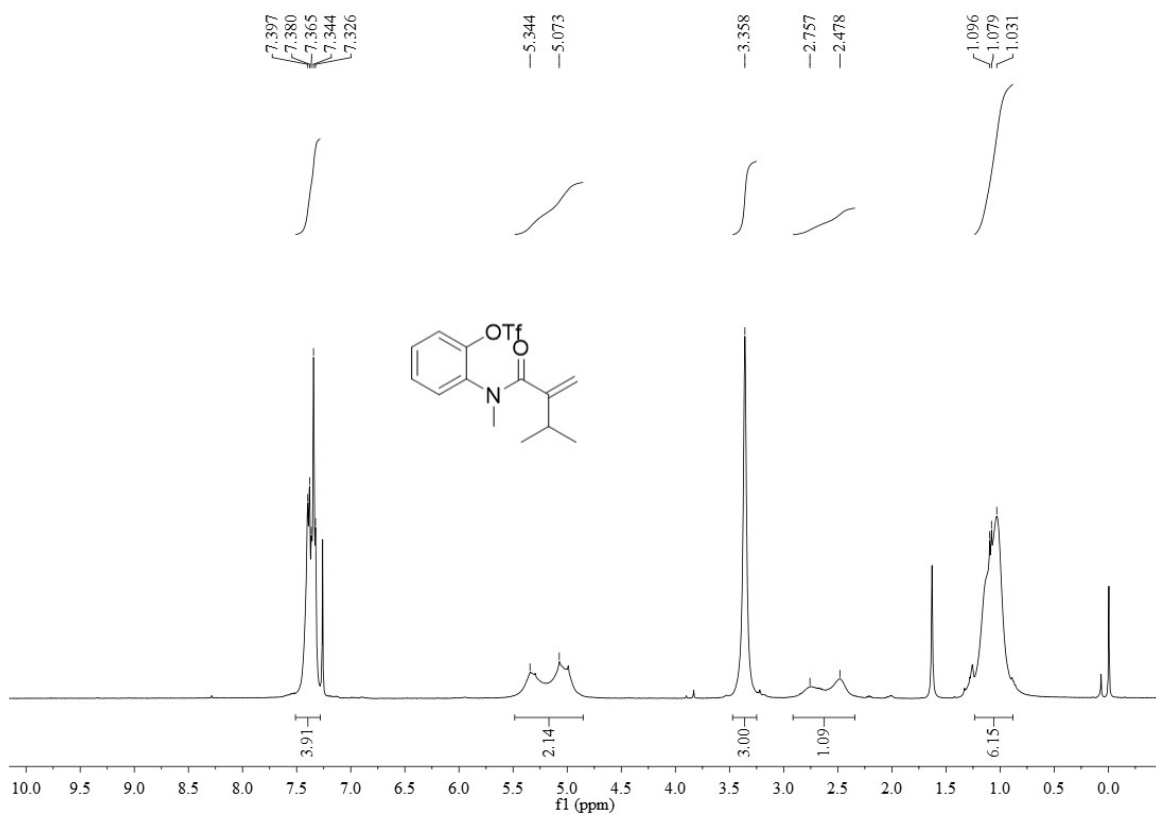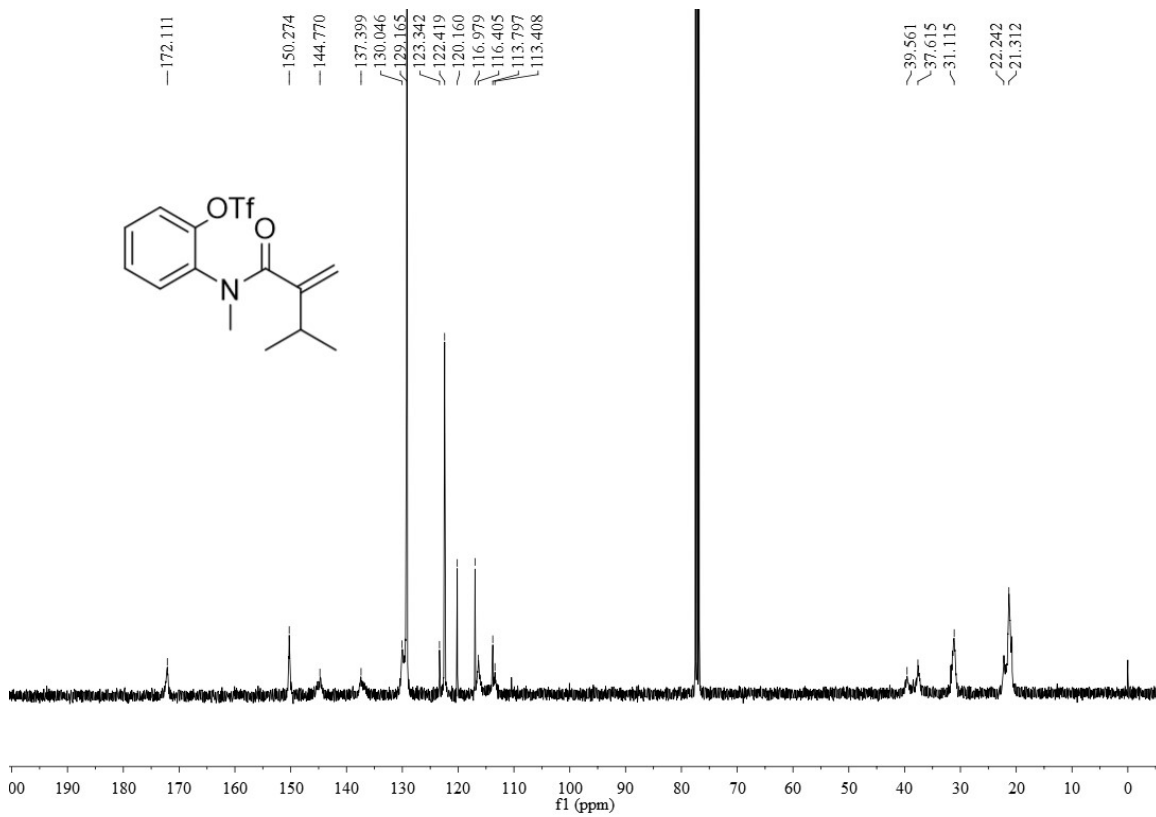

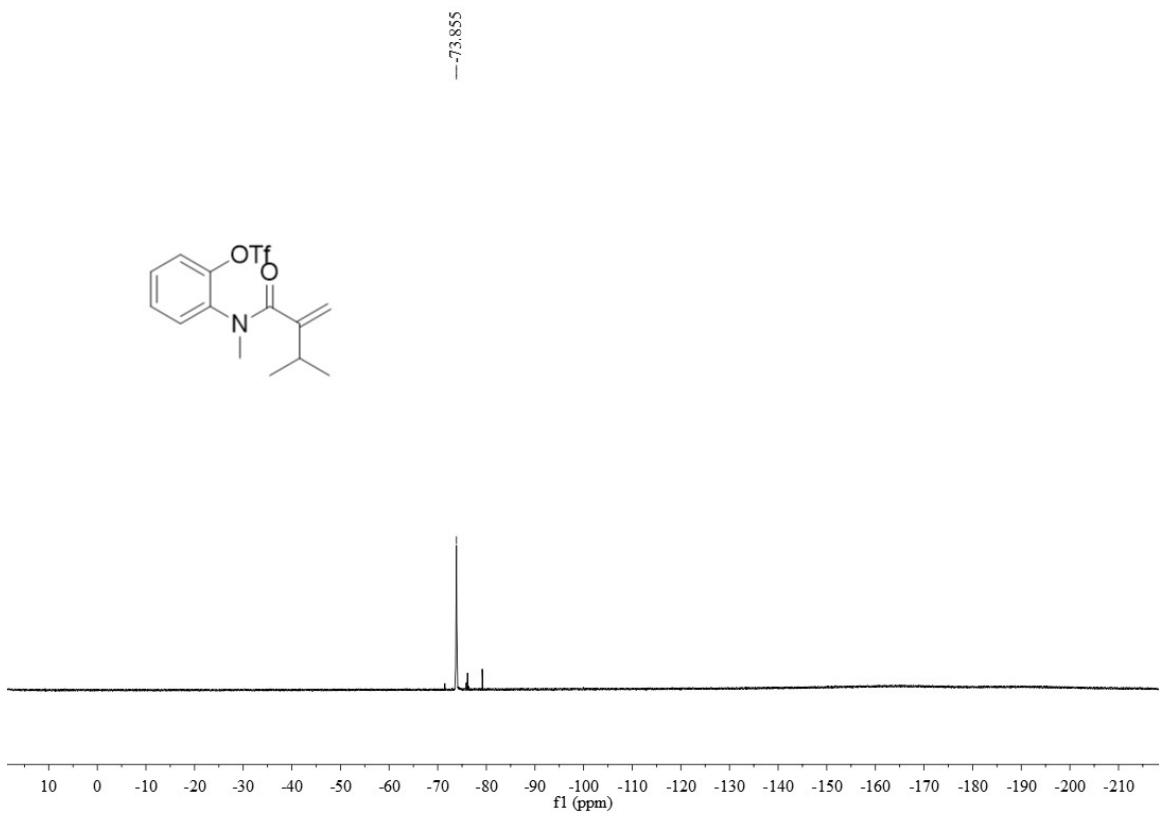

**2a**

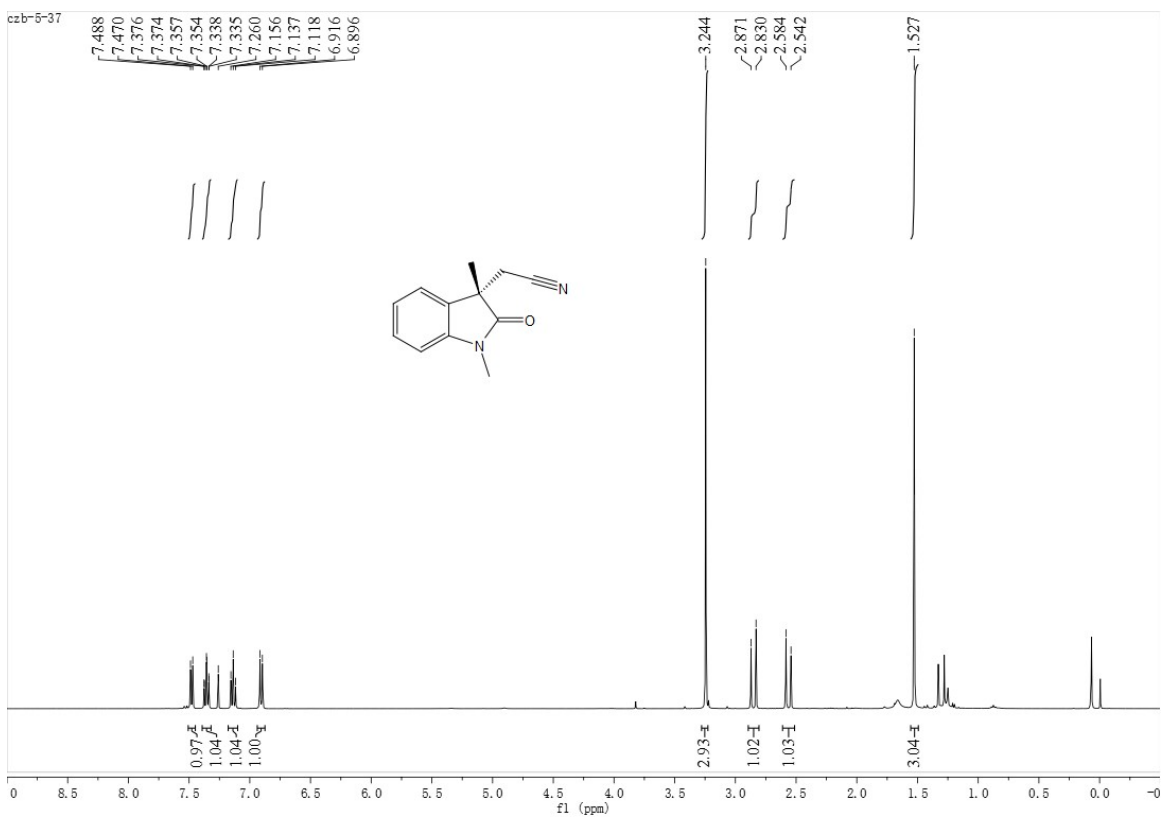

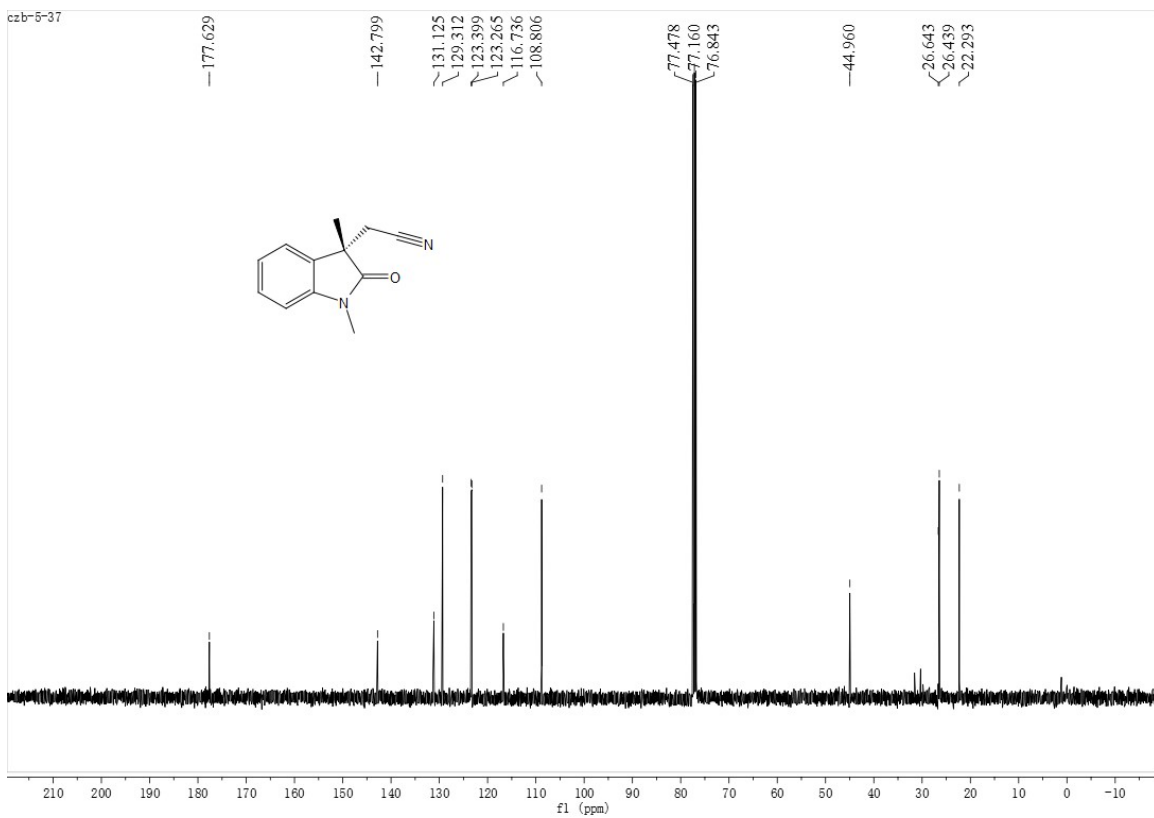

2b

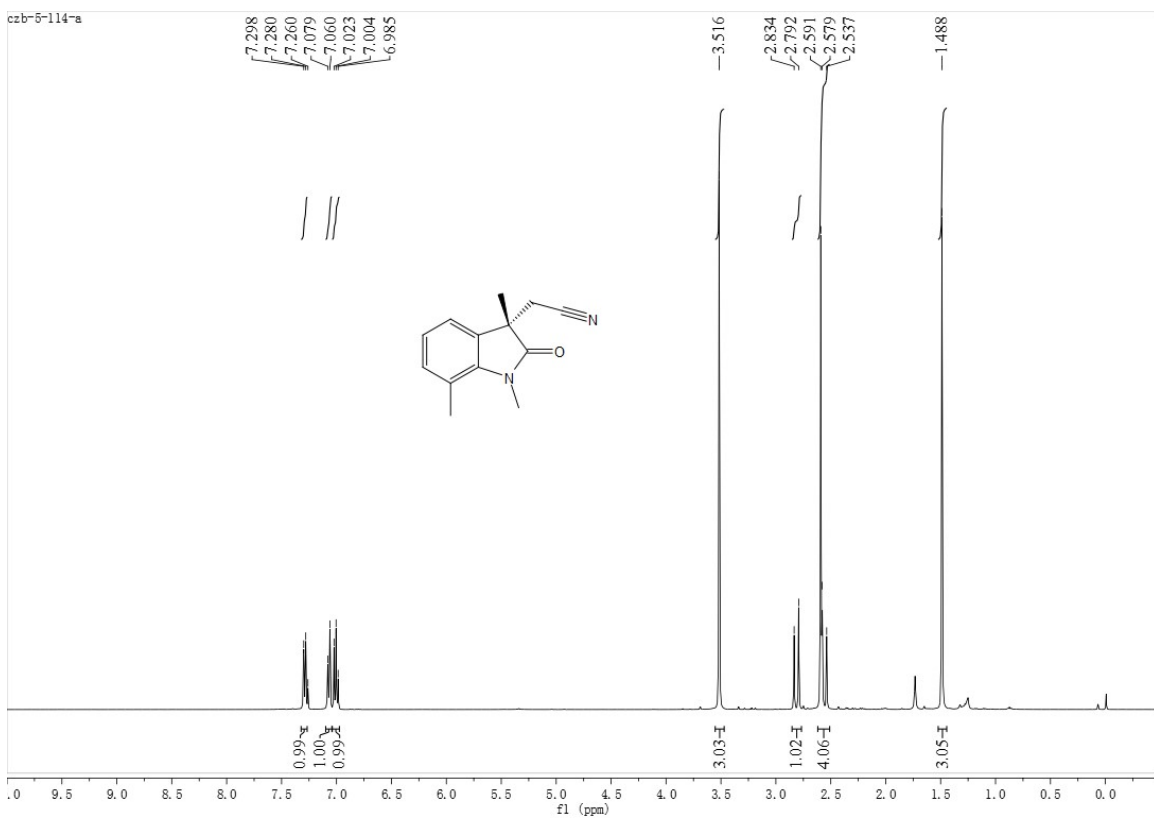

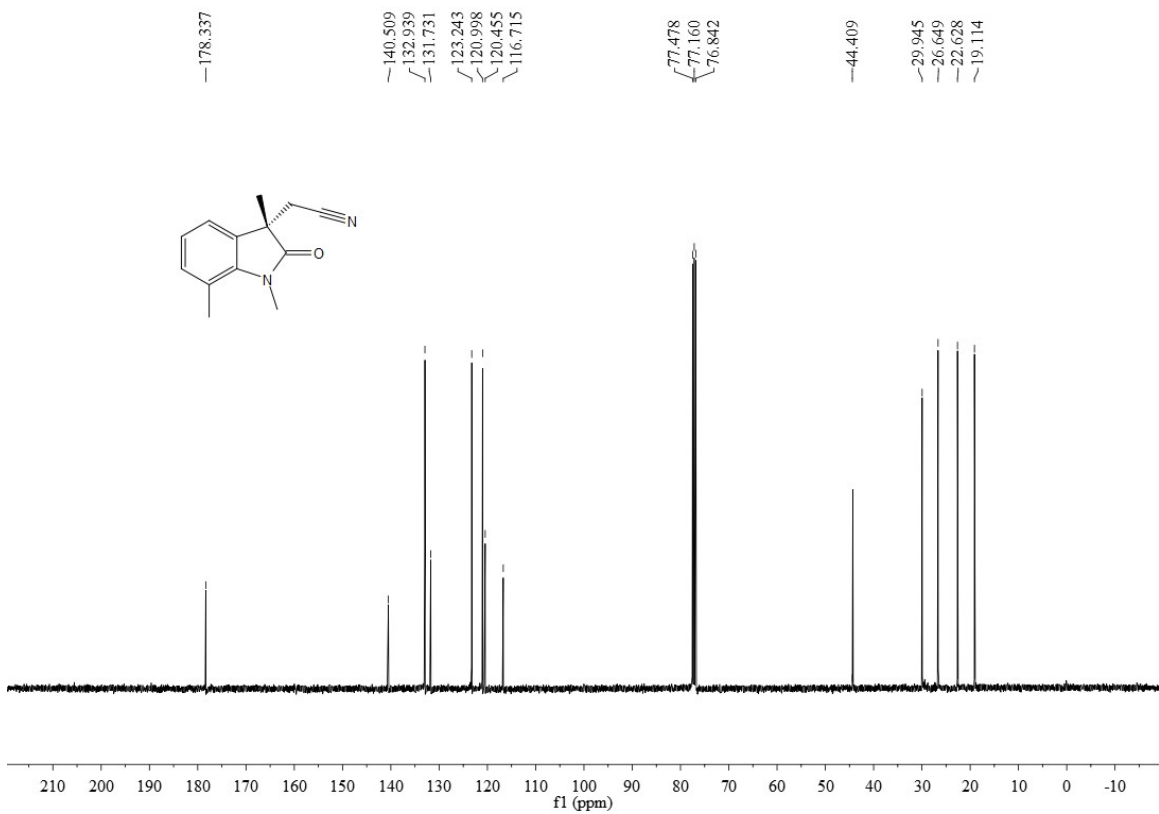

**2c**

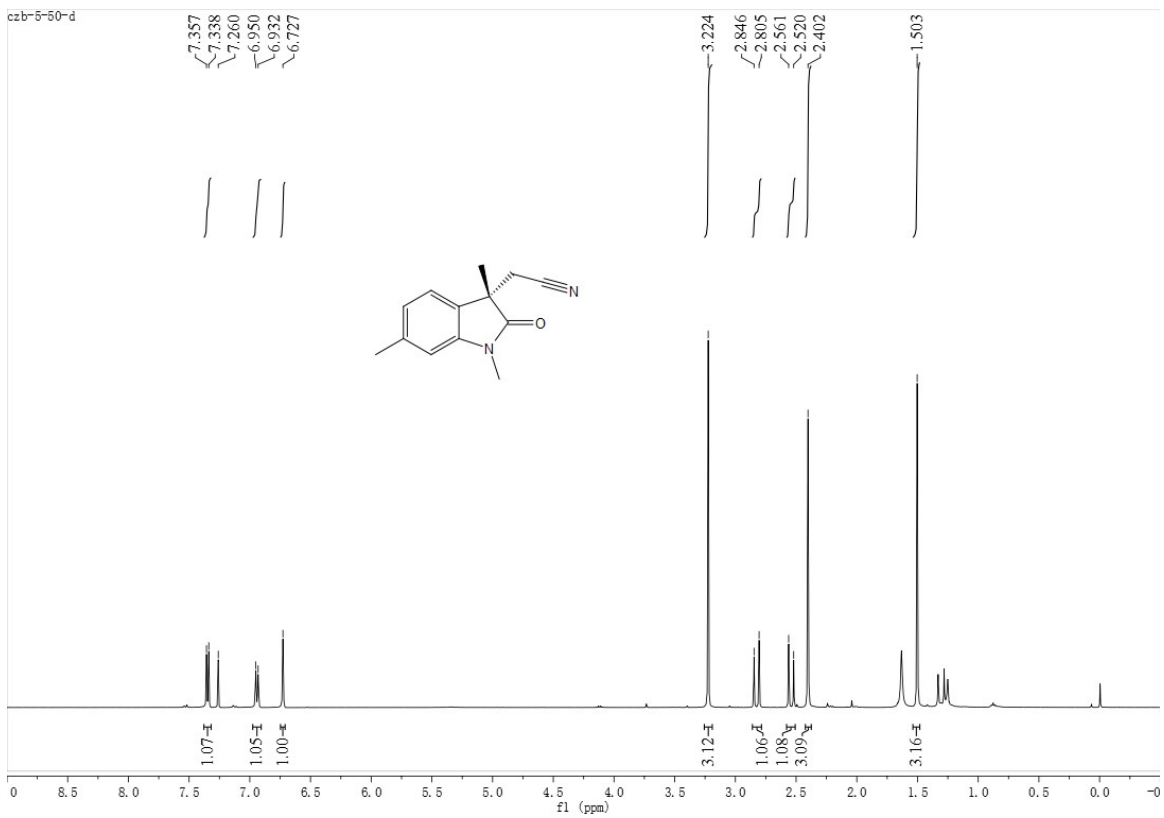

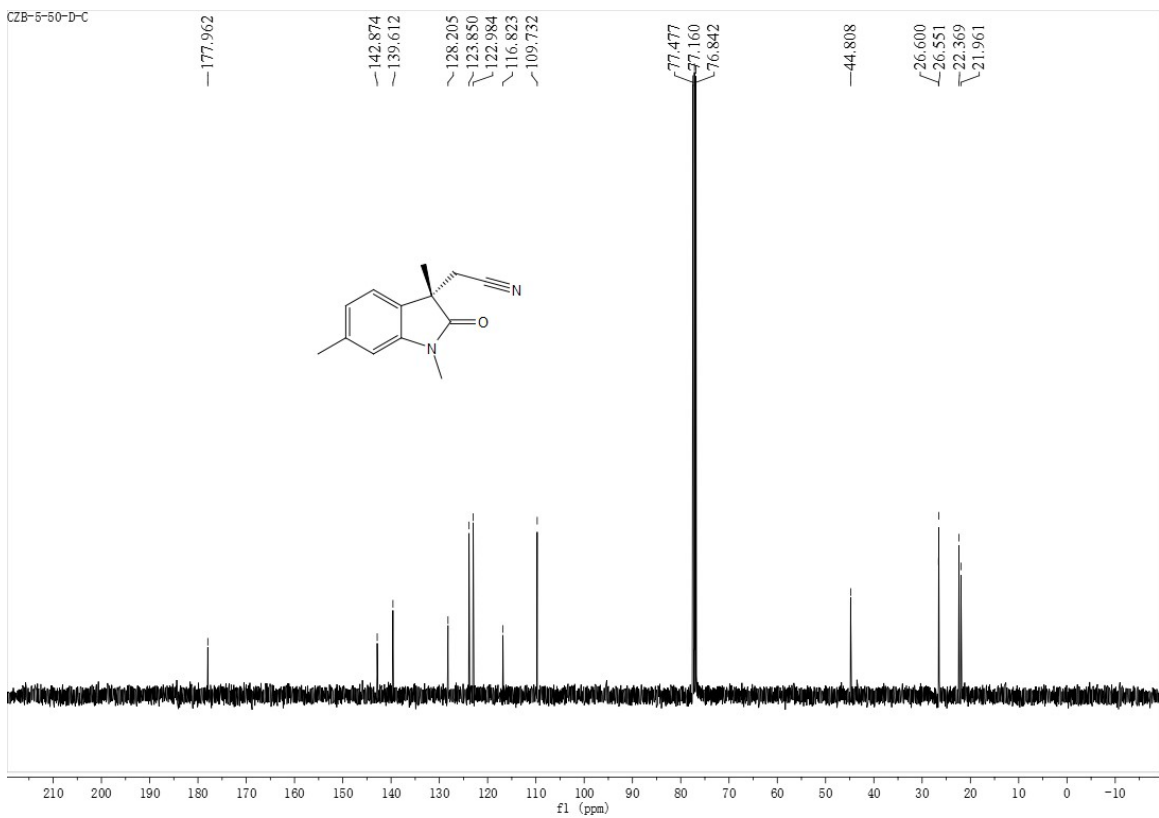

## 2d

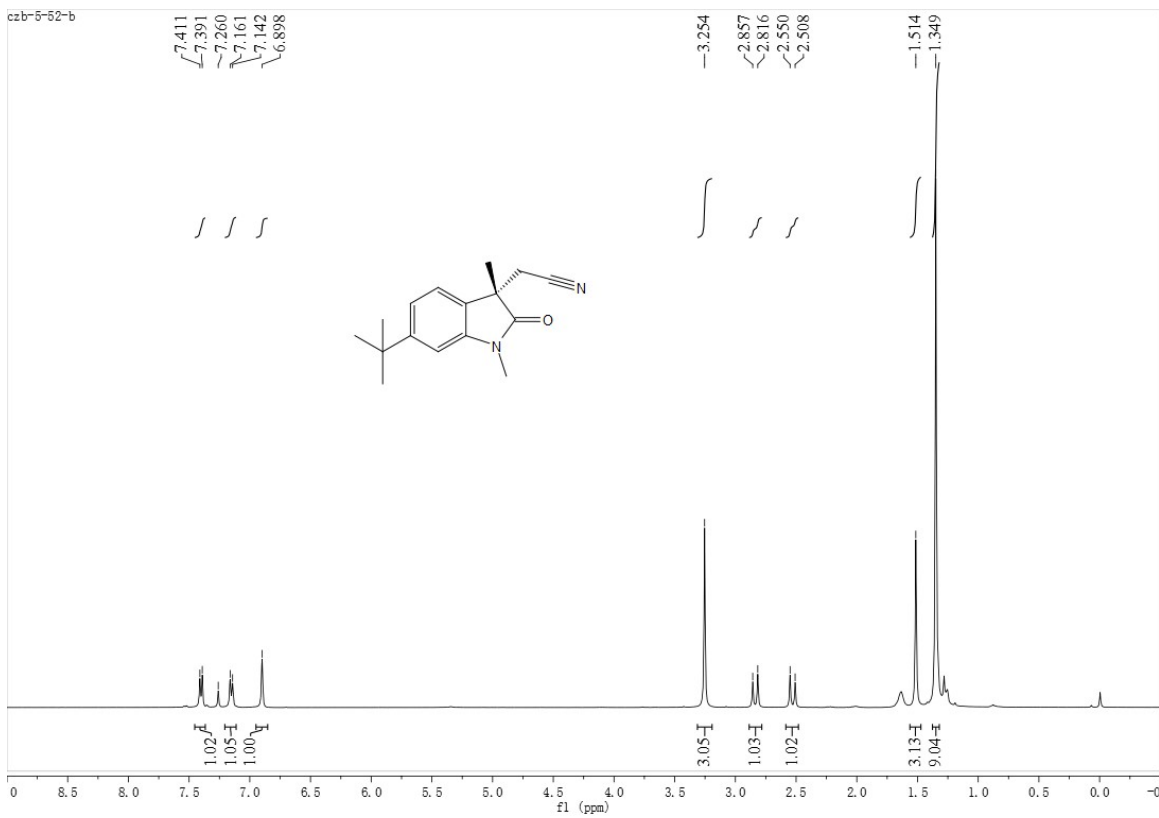

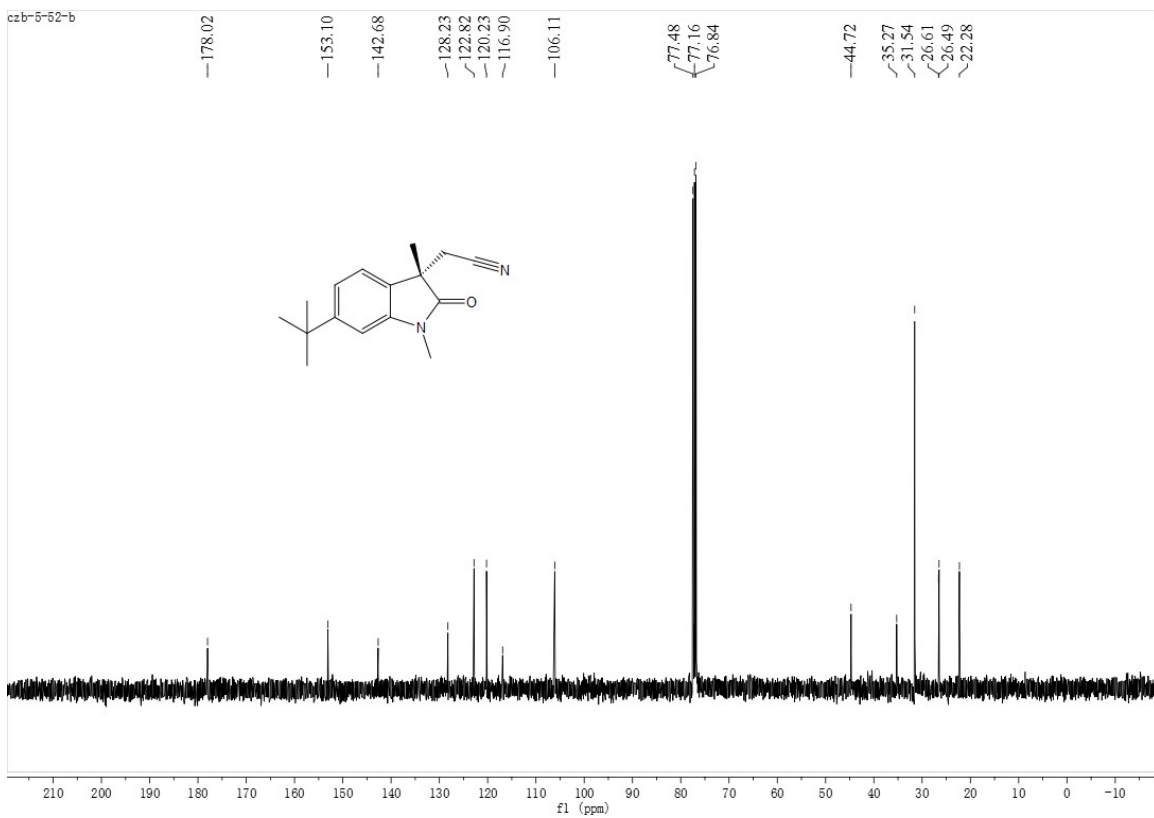

## 2e

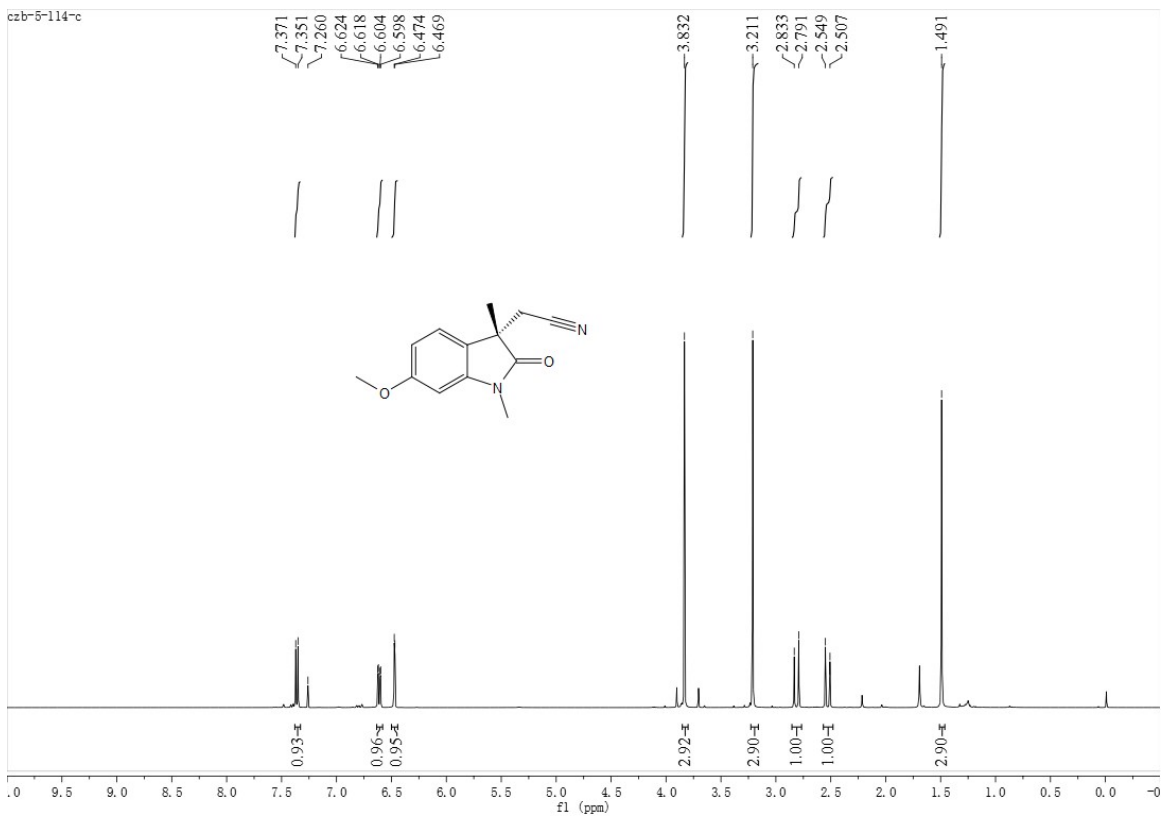



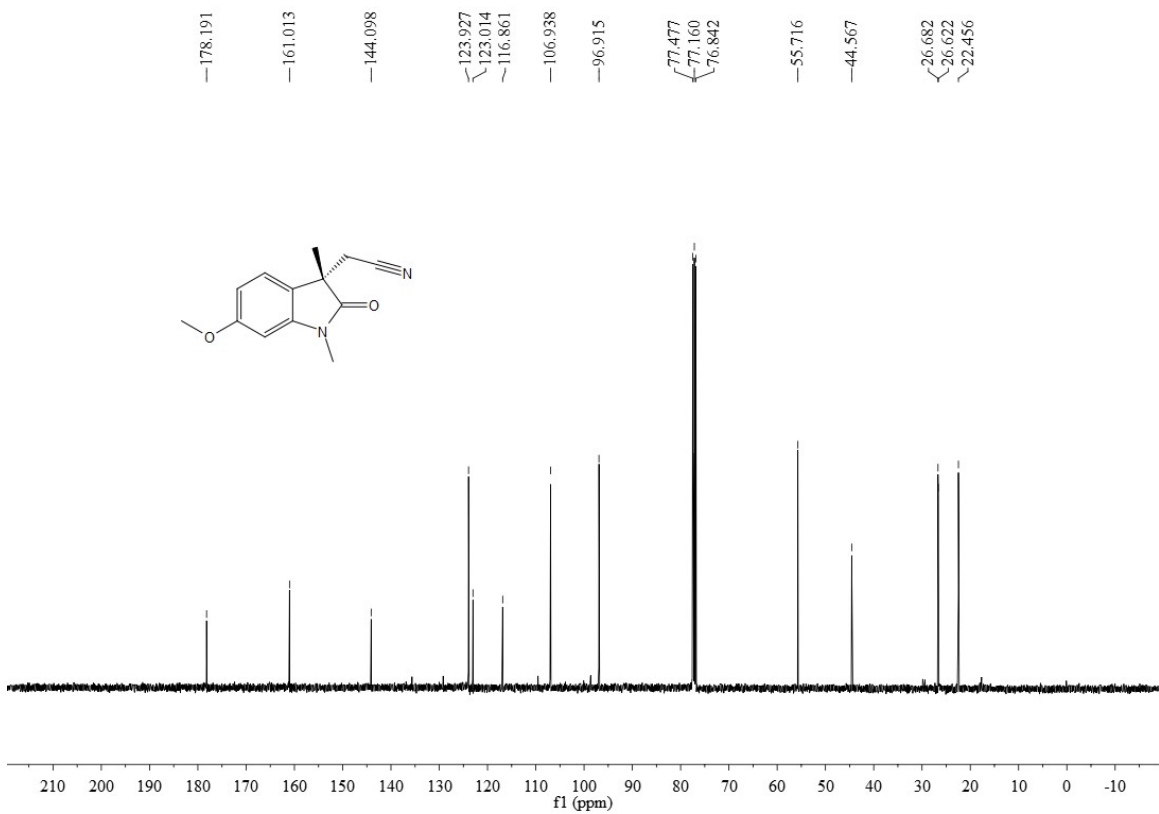

2f

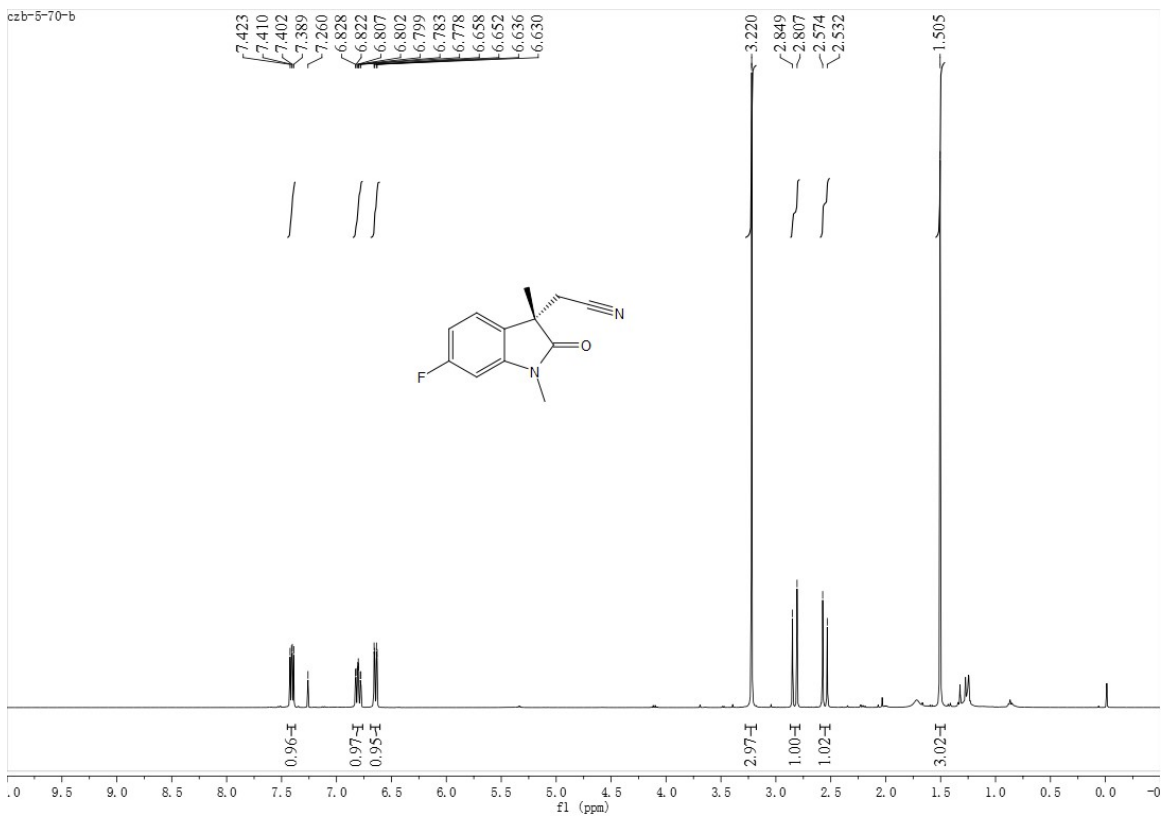

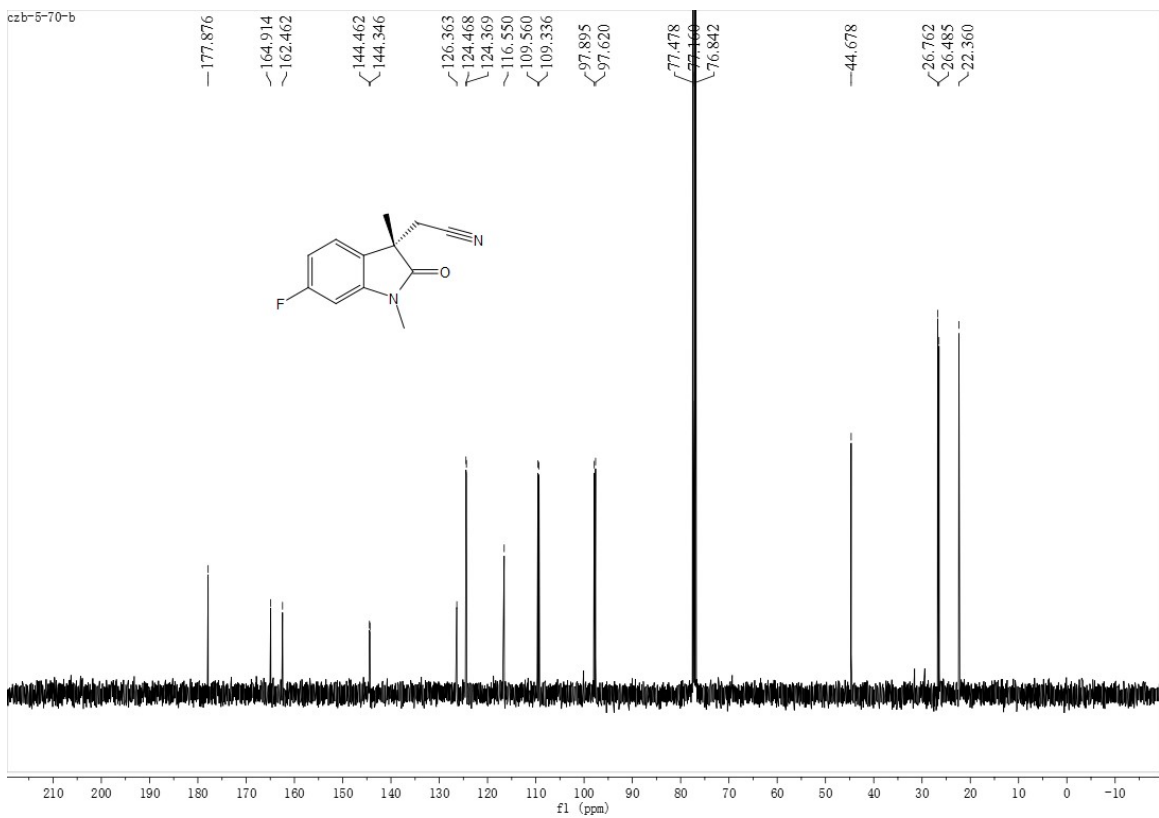

## 2g

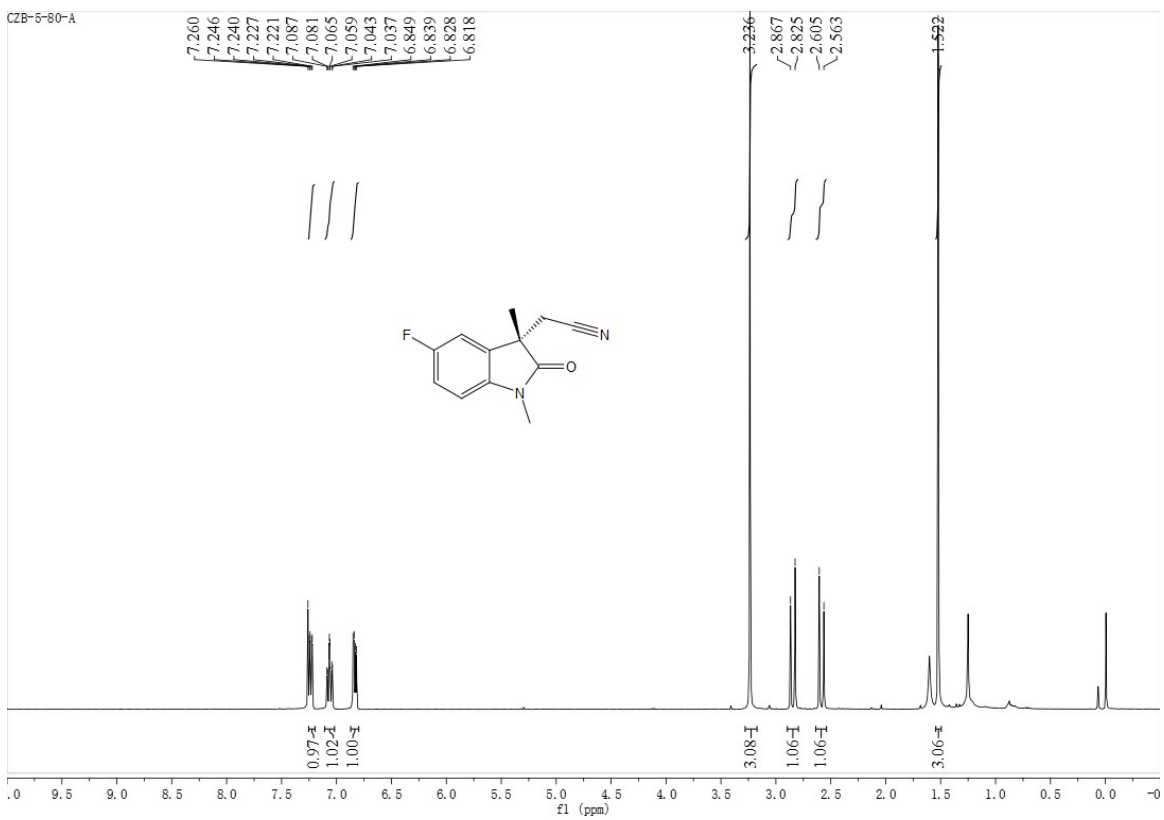

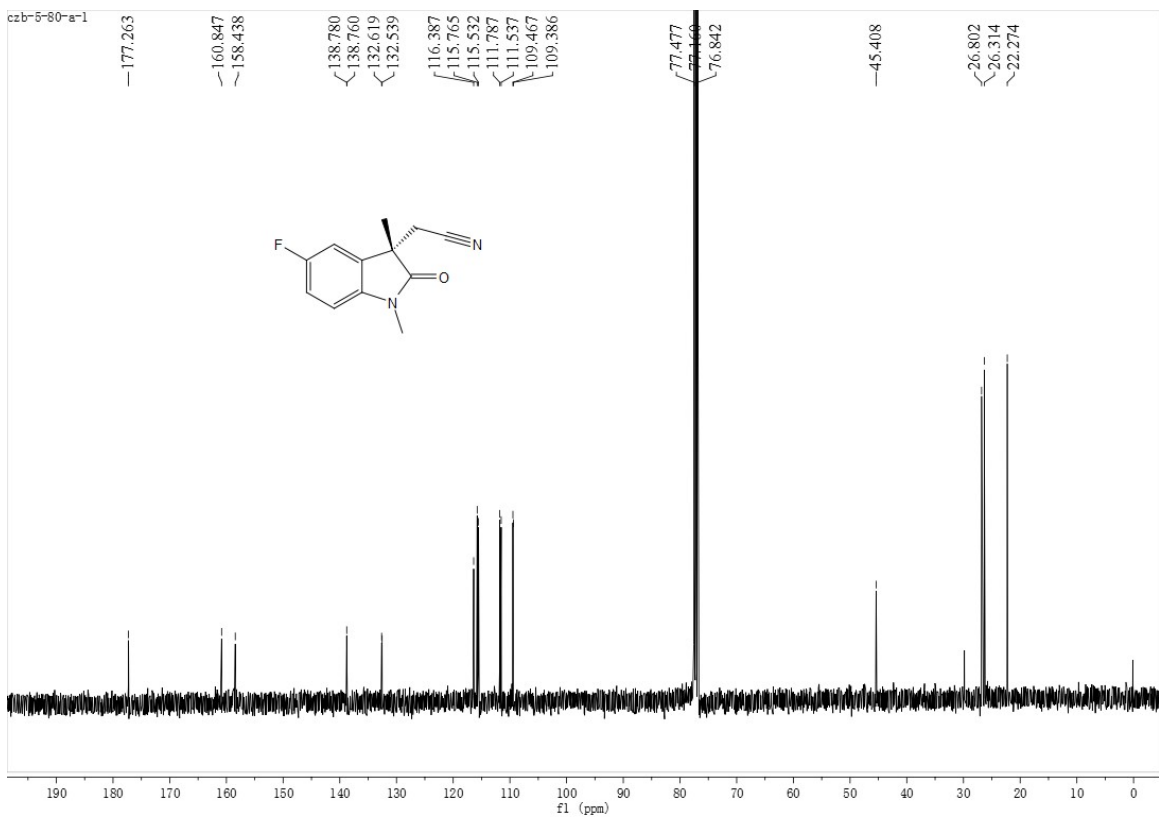

## 2h

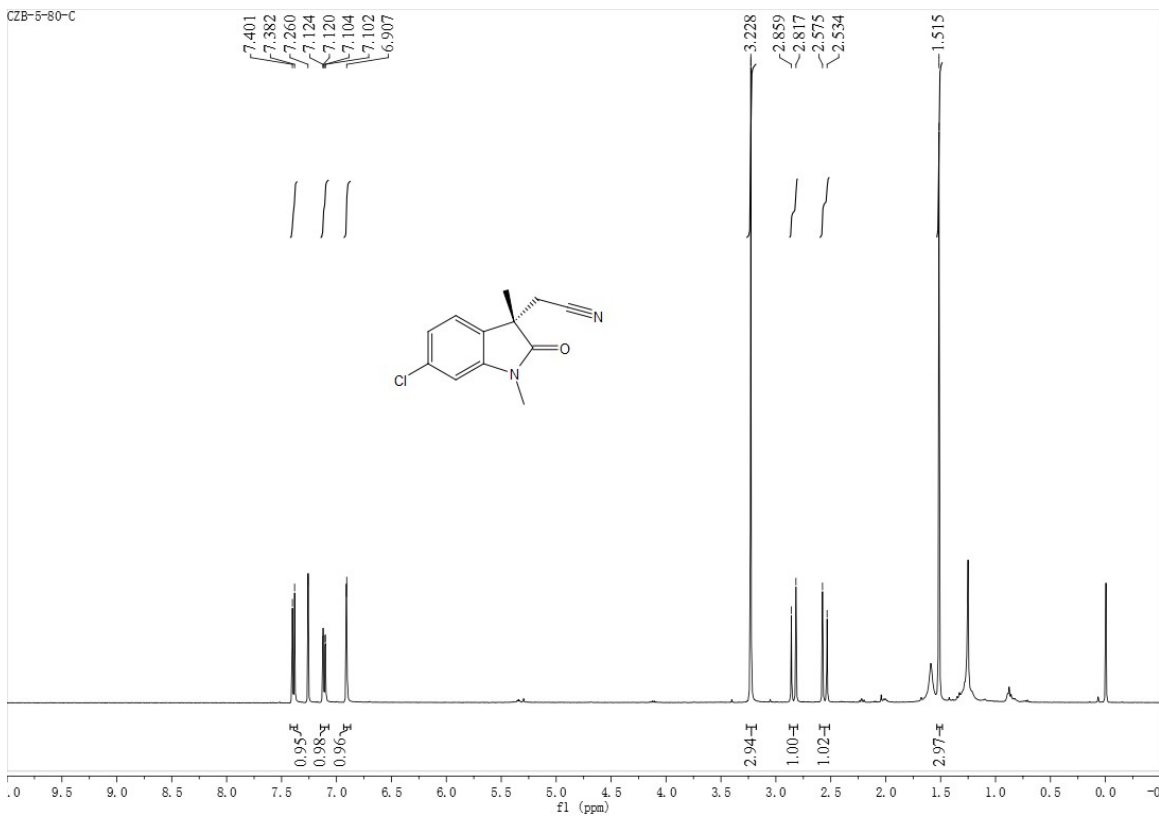

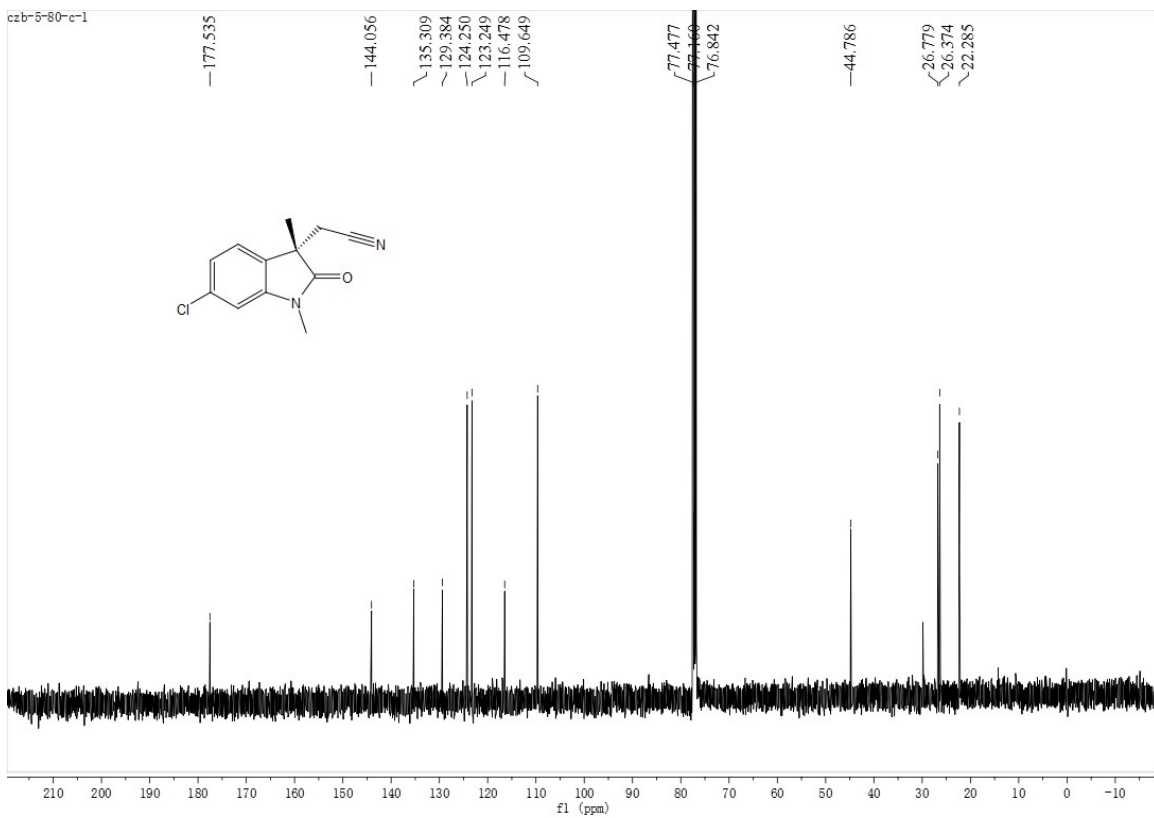

2i

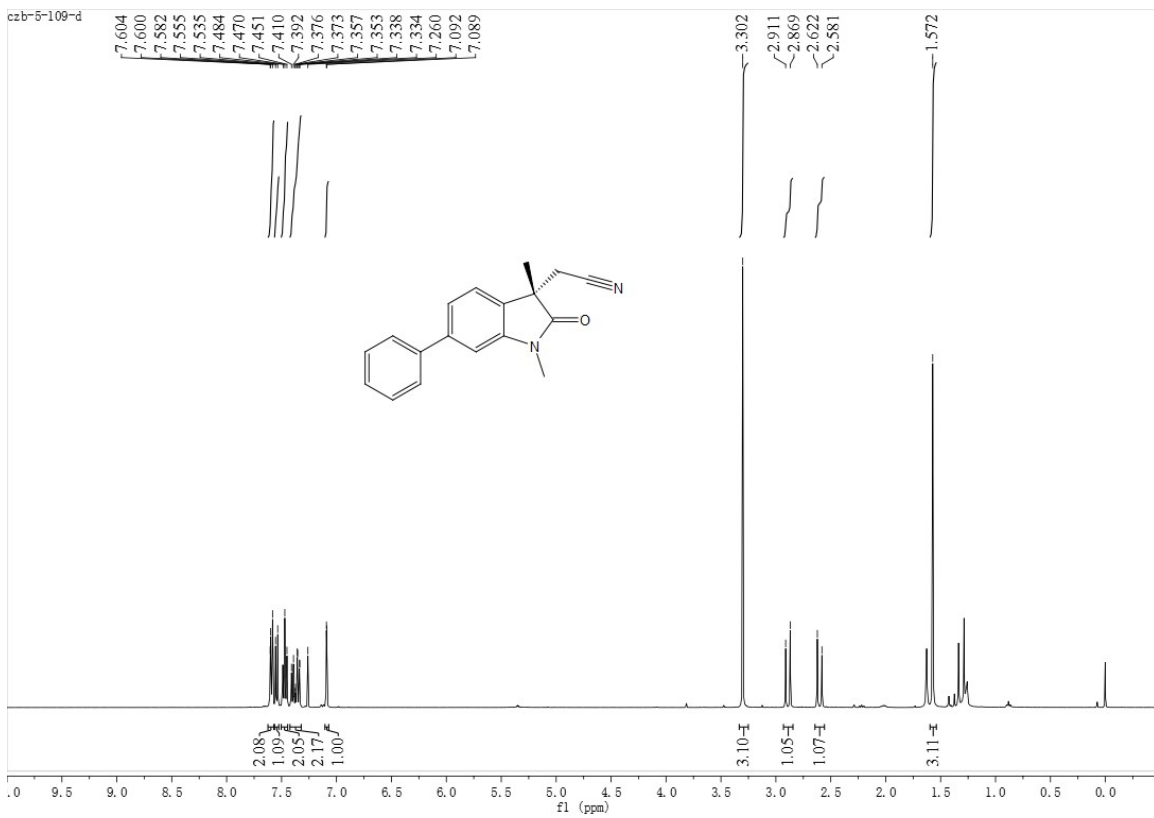

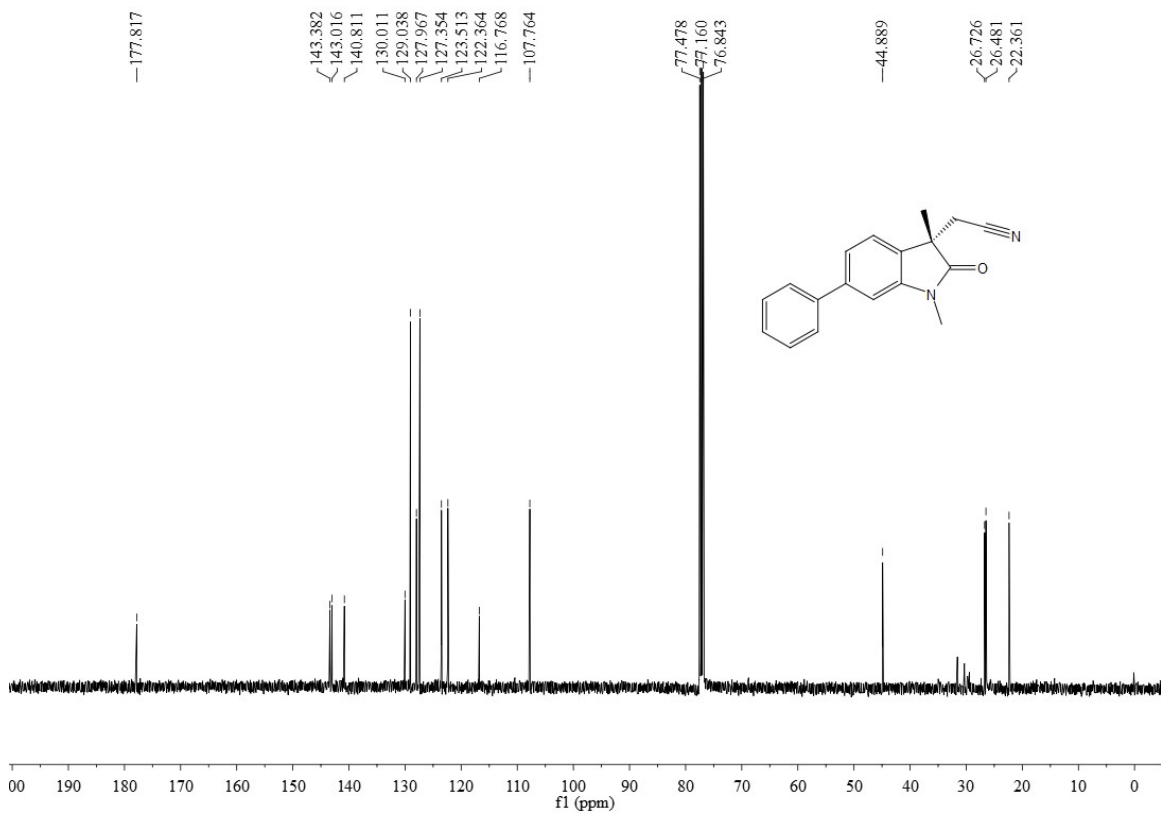

2j

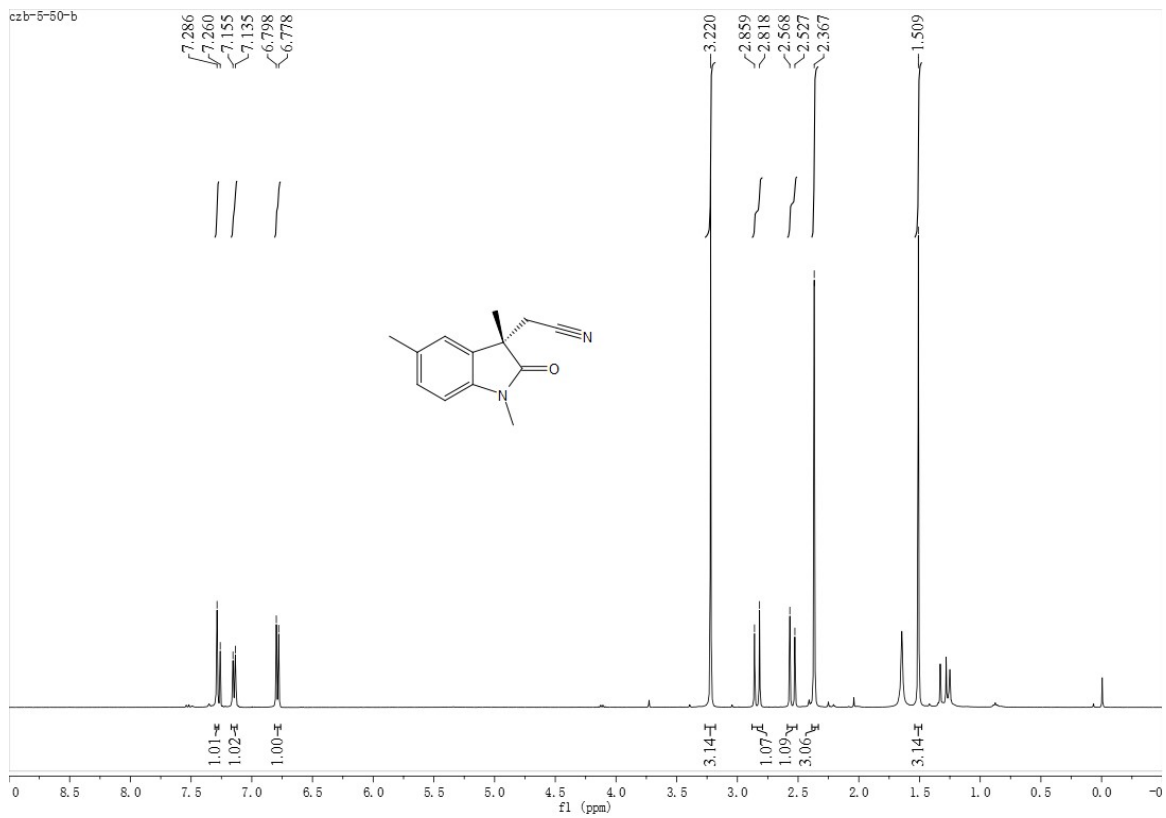

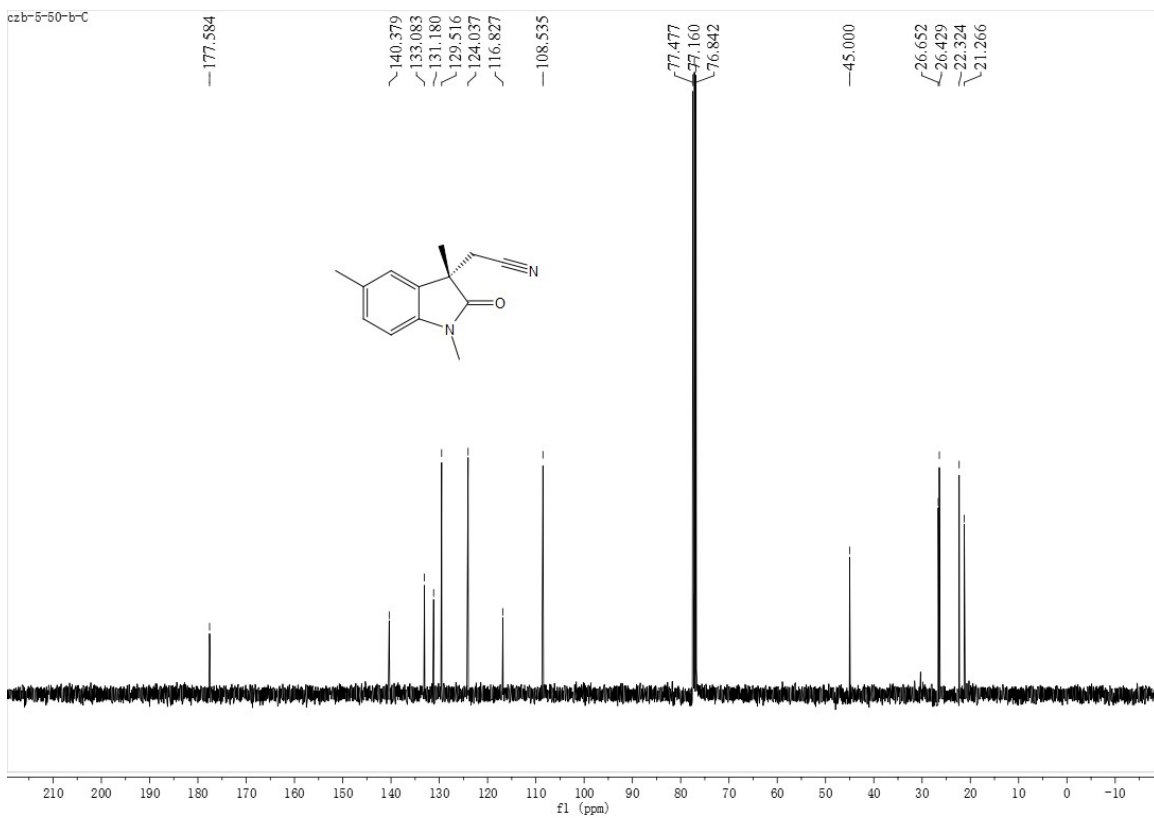

2k

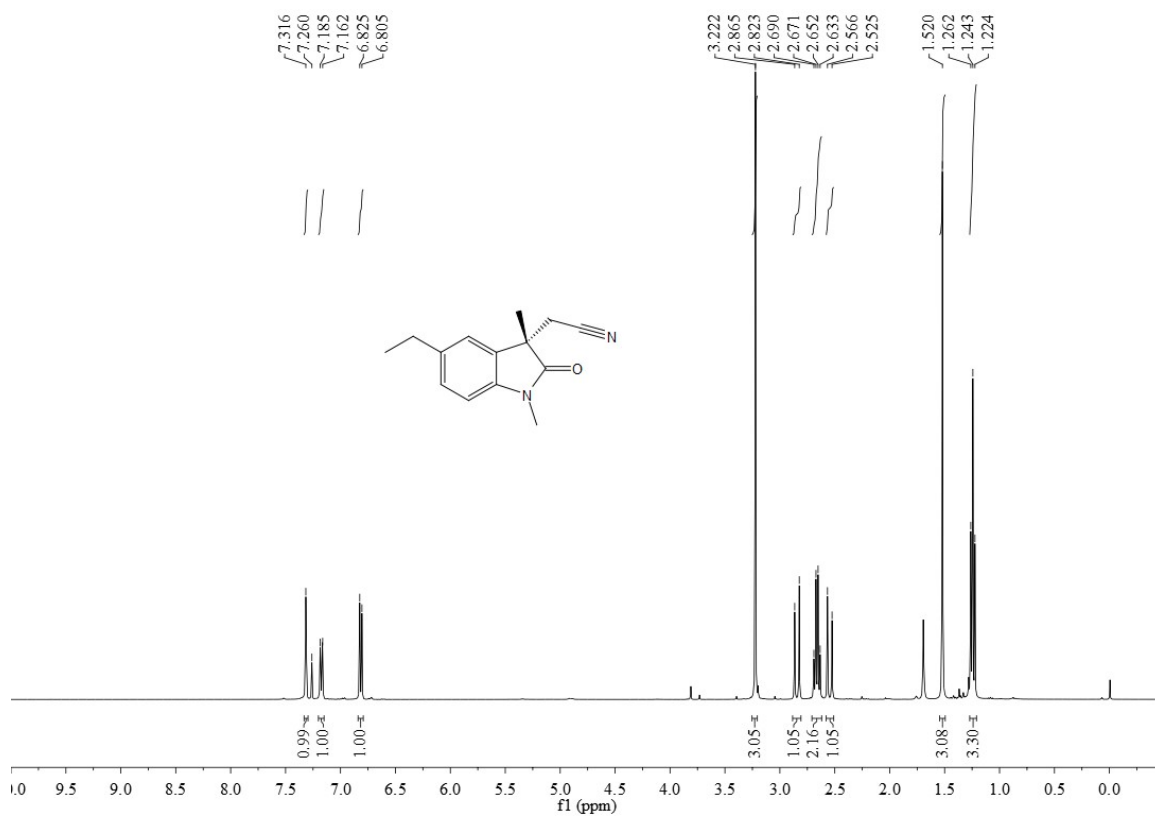

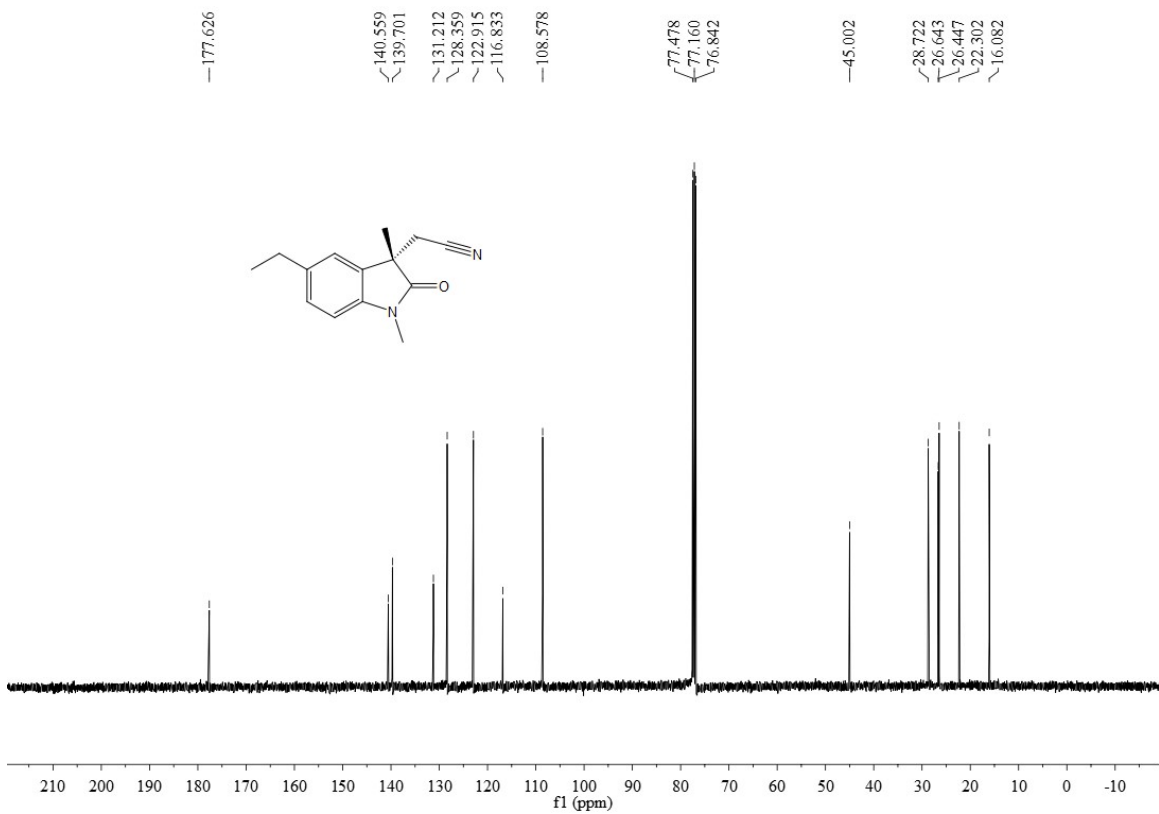

21

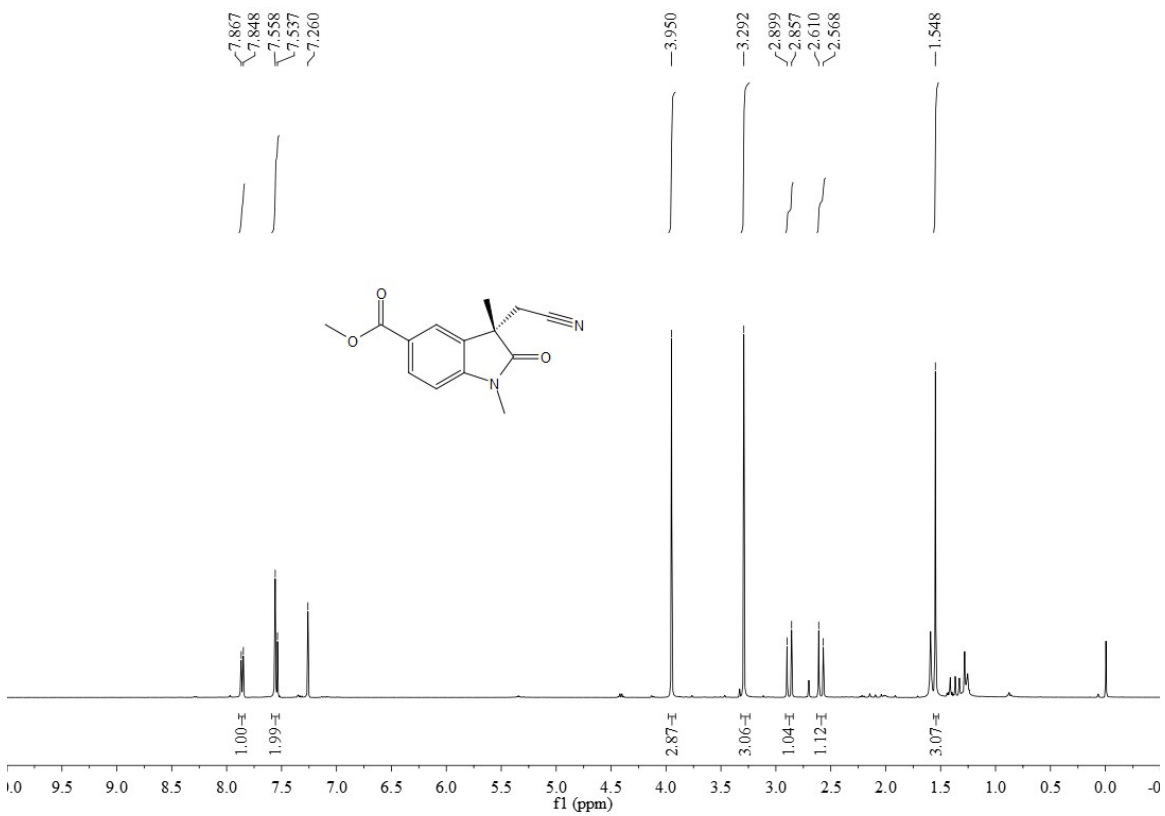

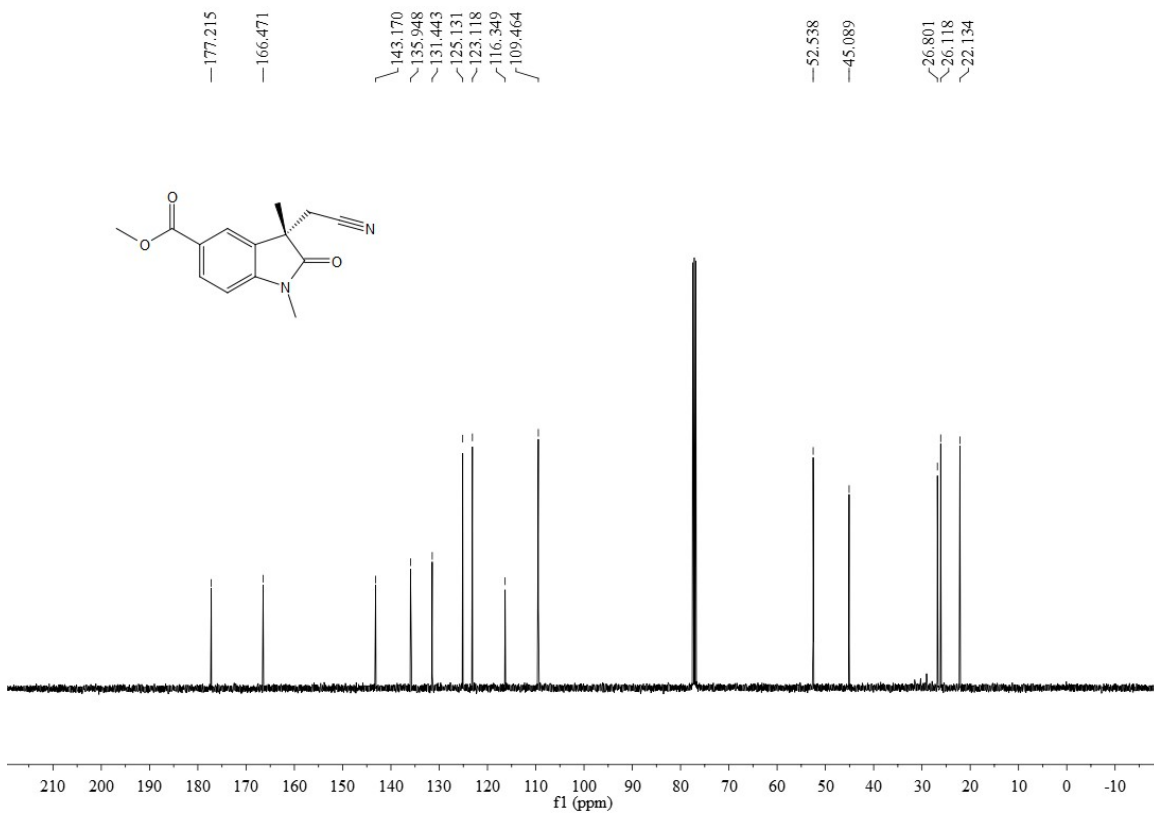

## 2m

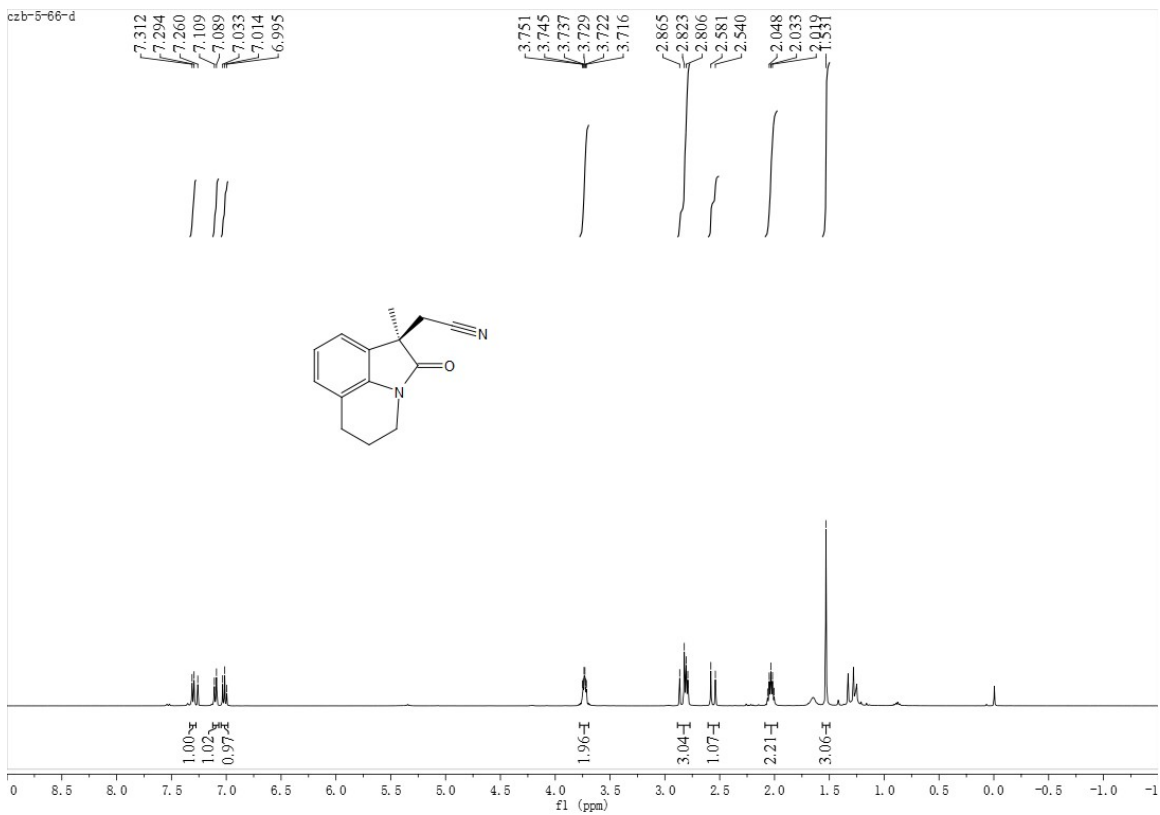



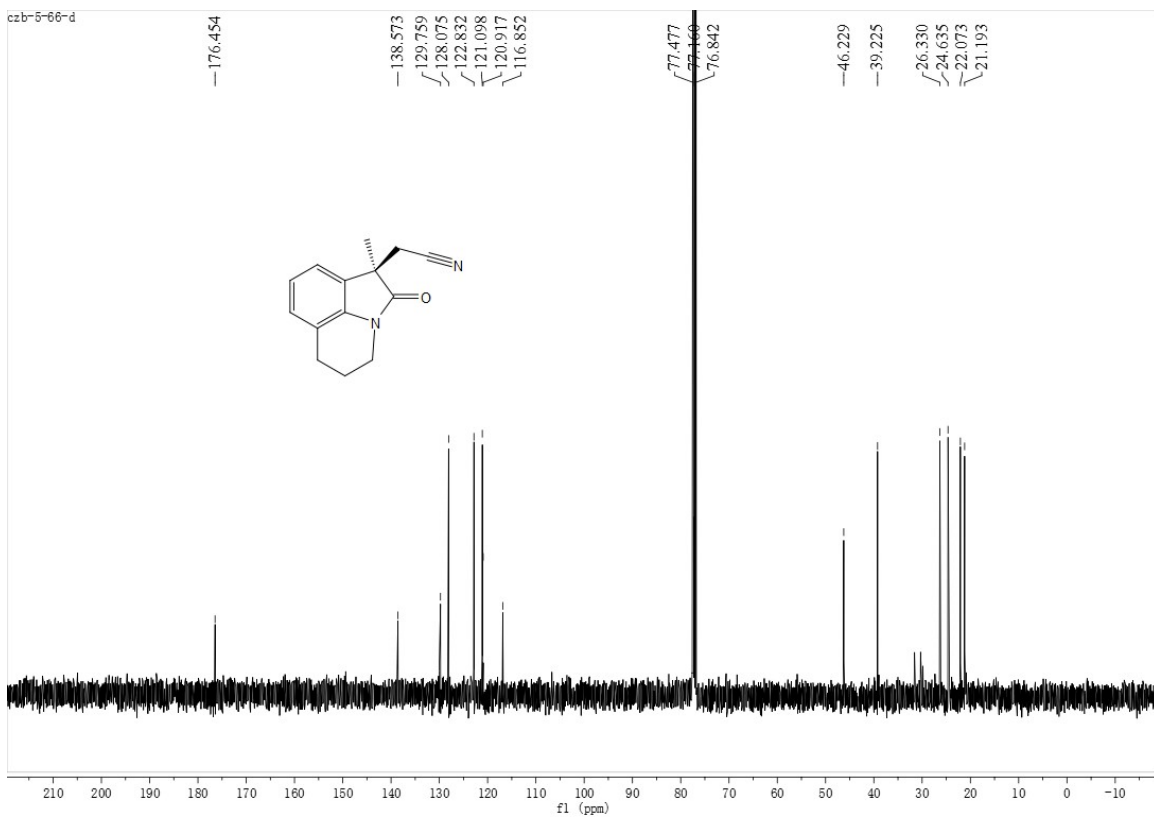

## 2n

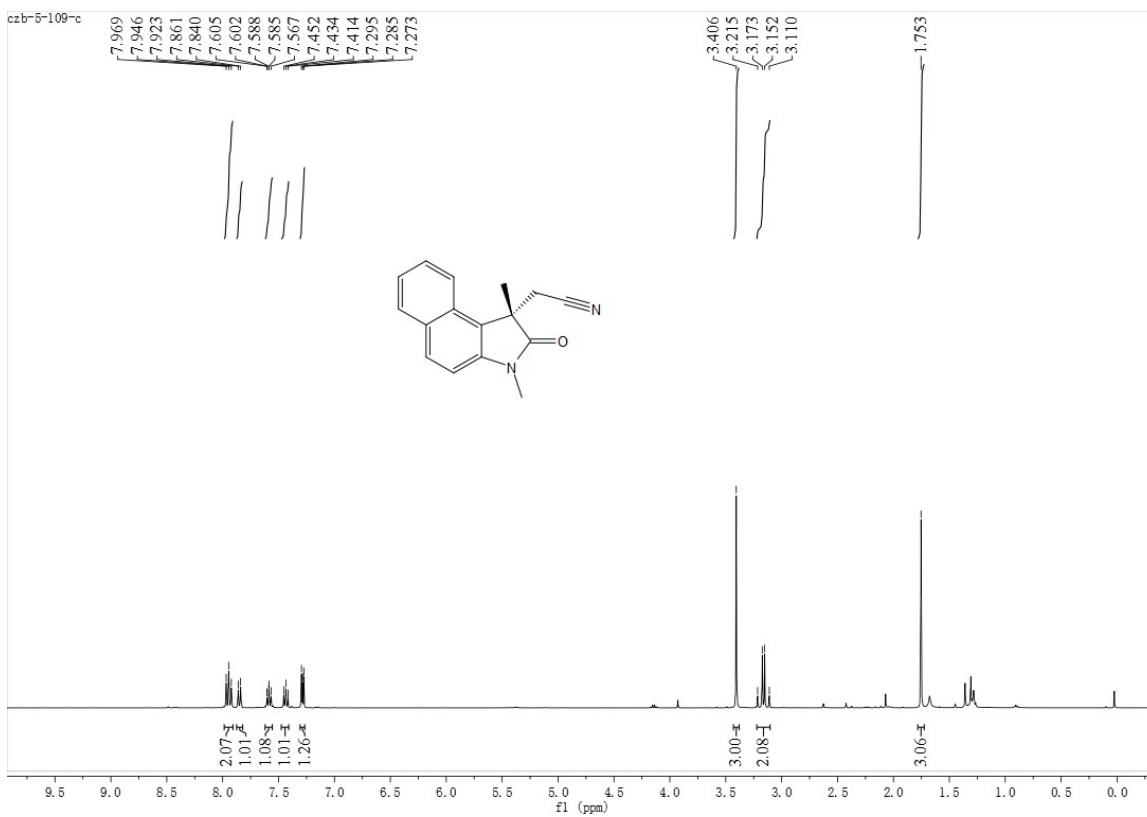

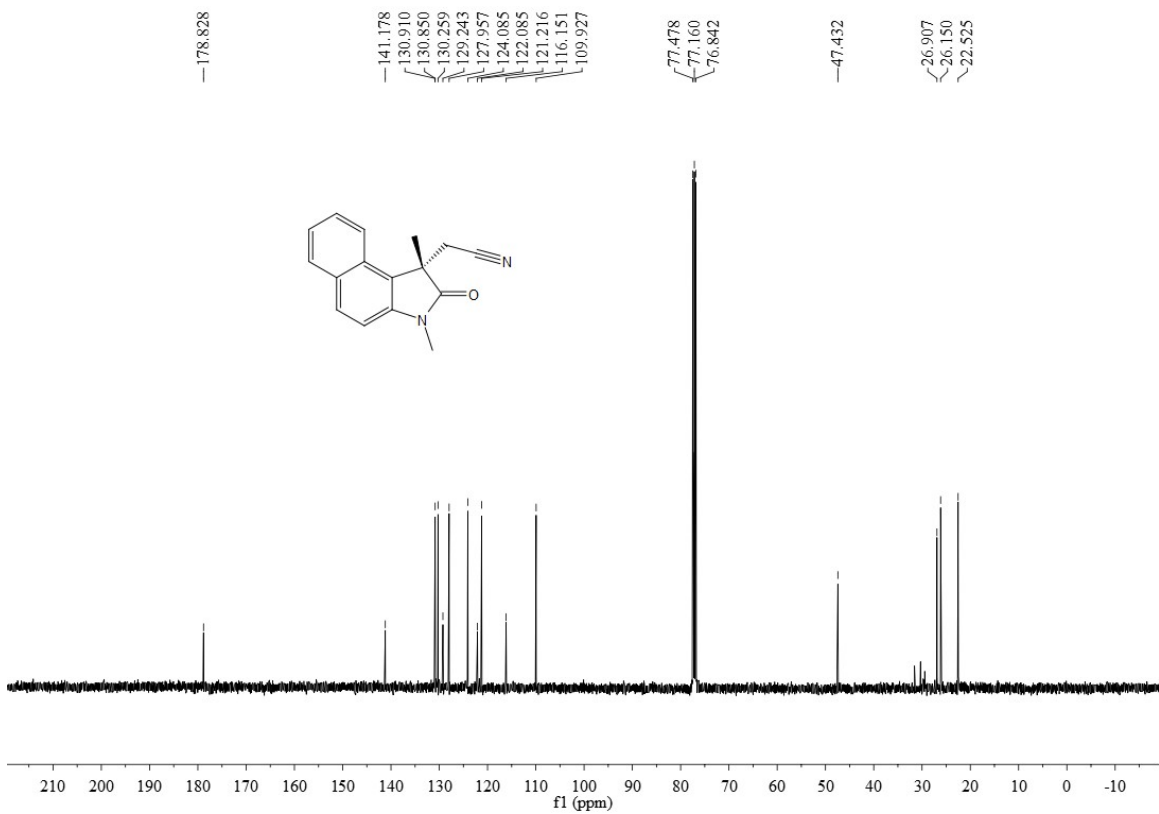

2o

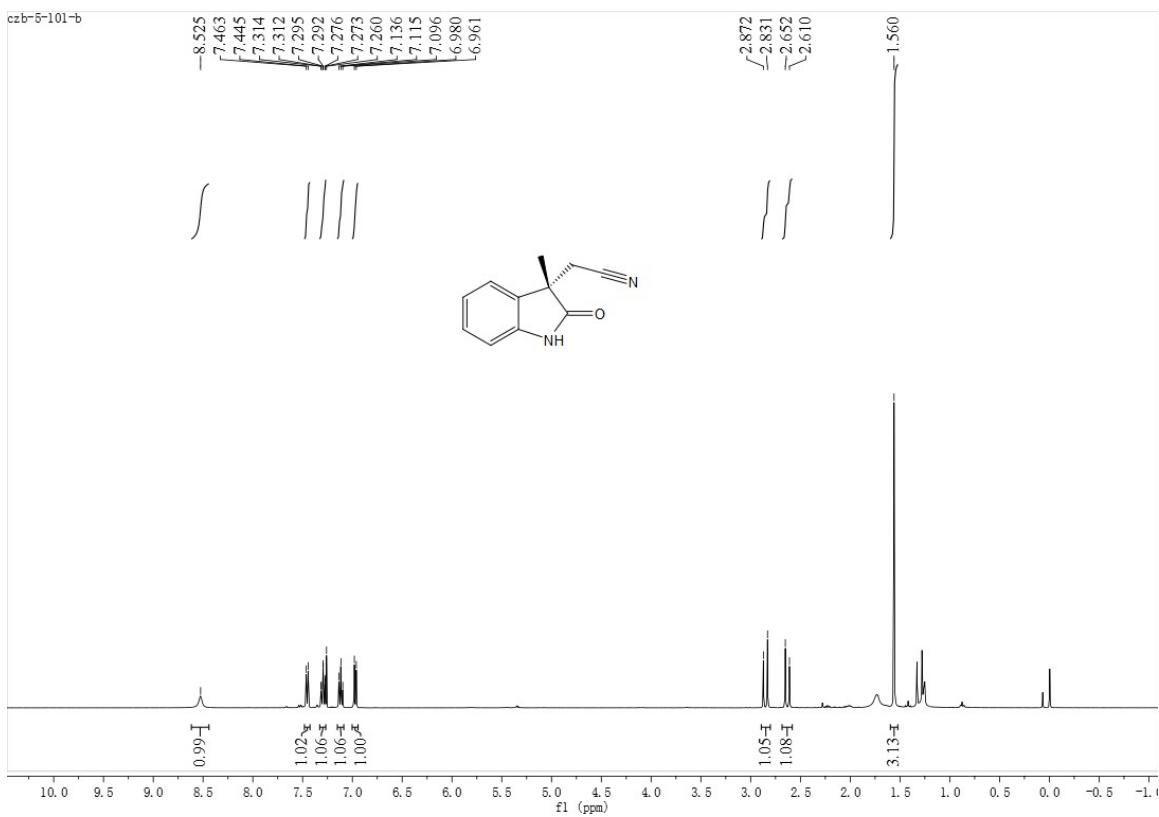

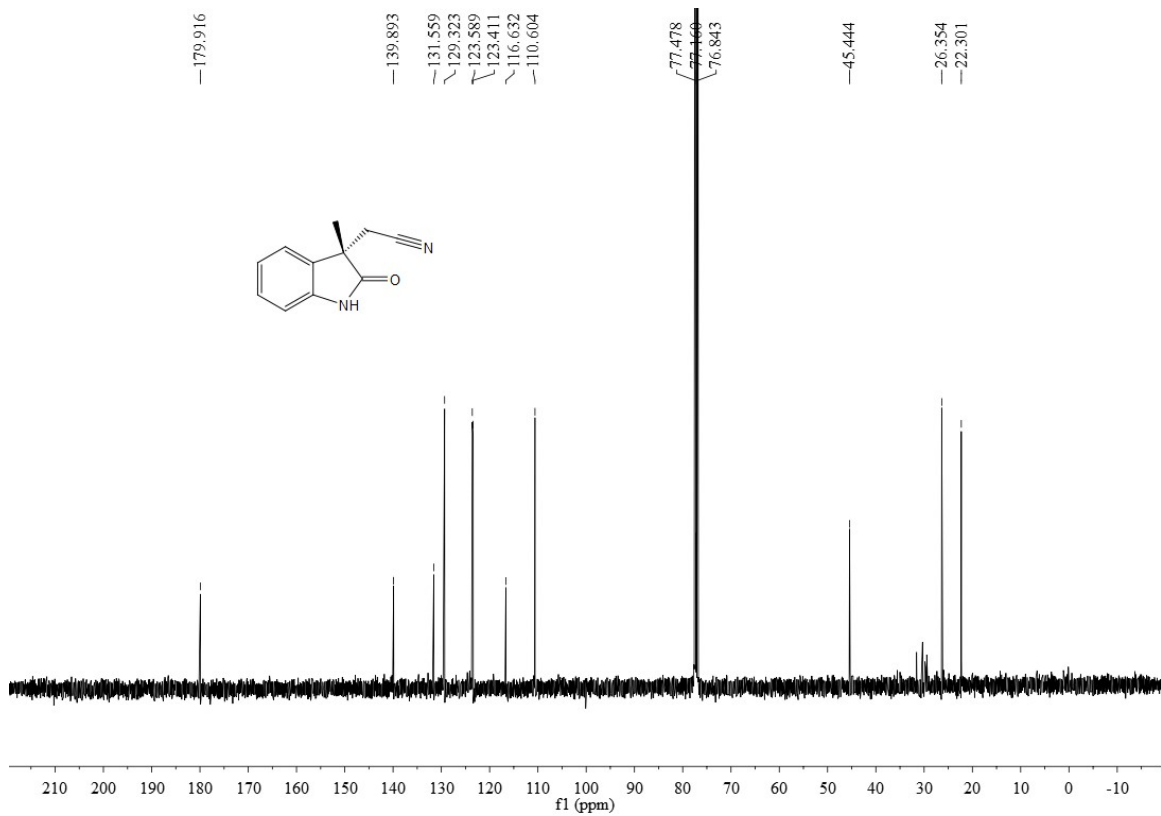

2p

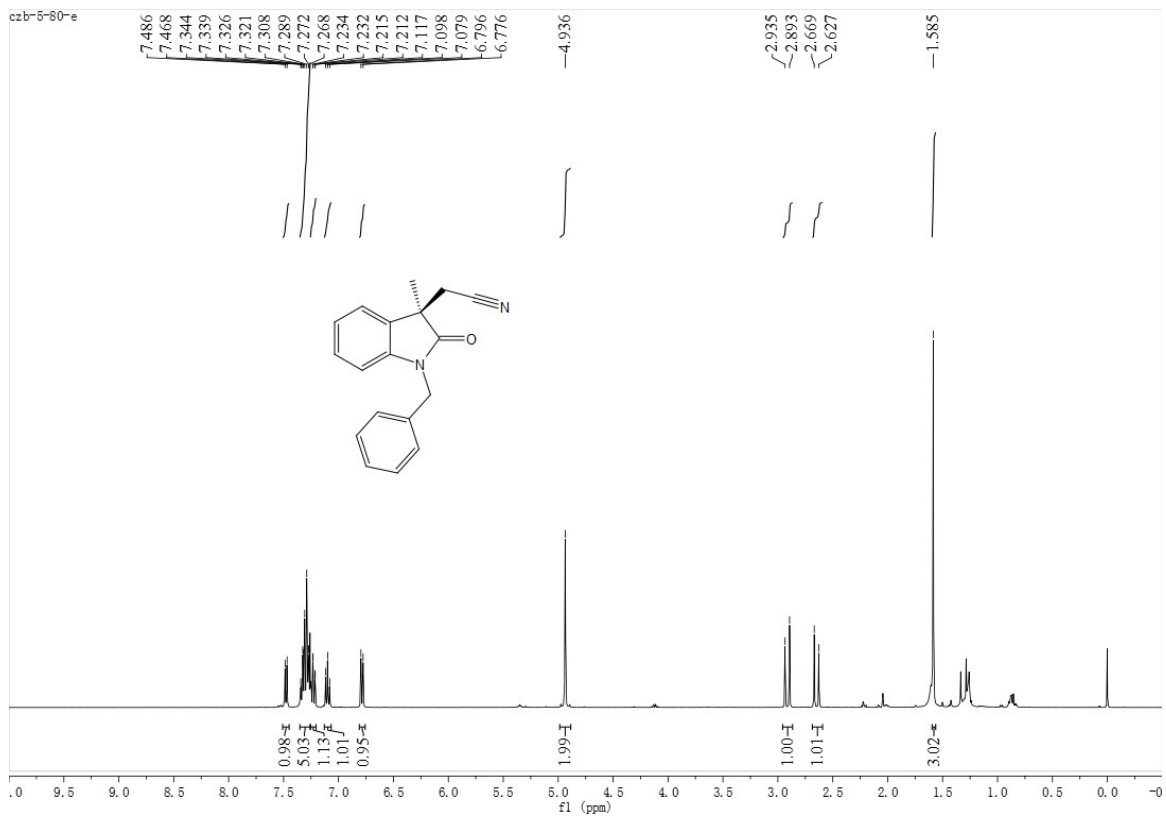

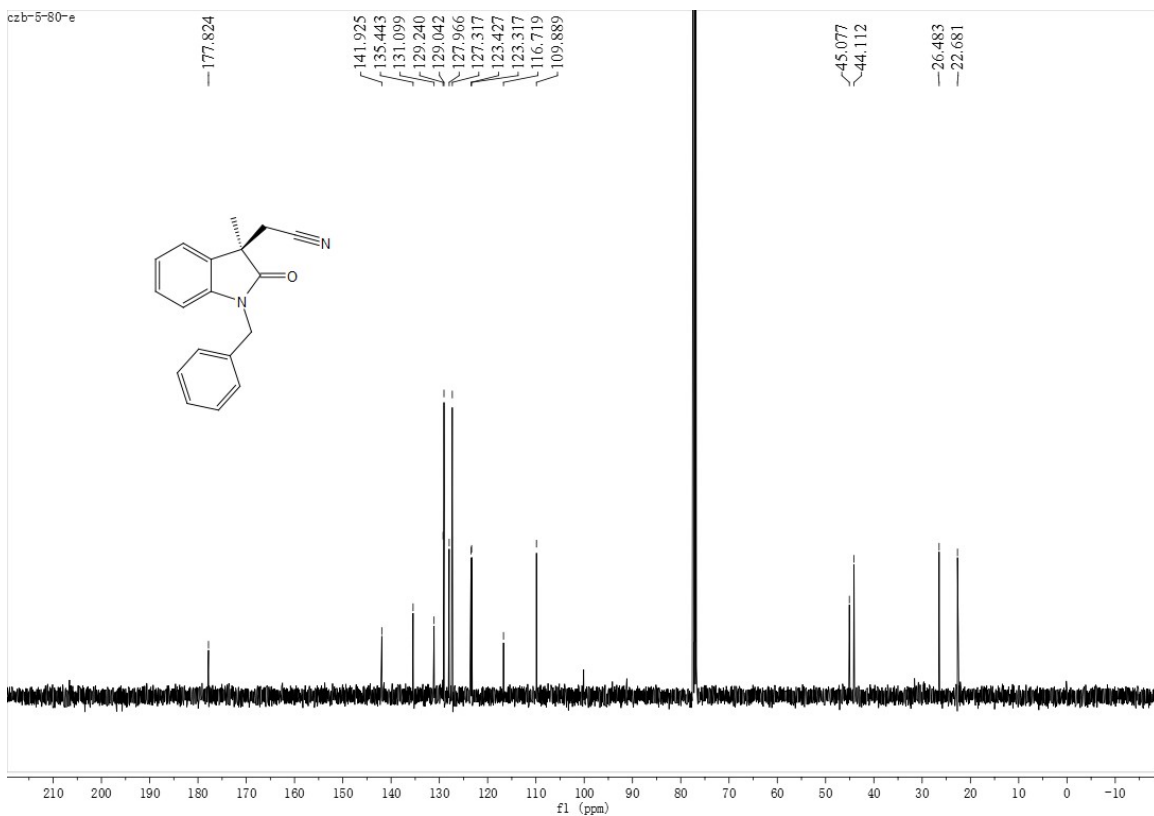

2q

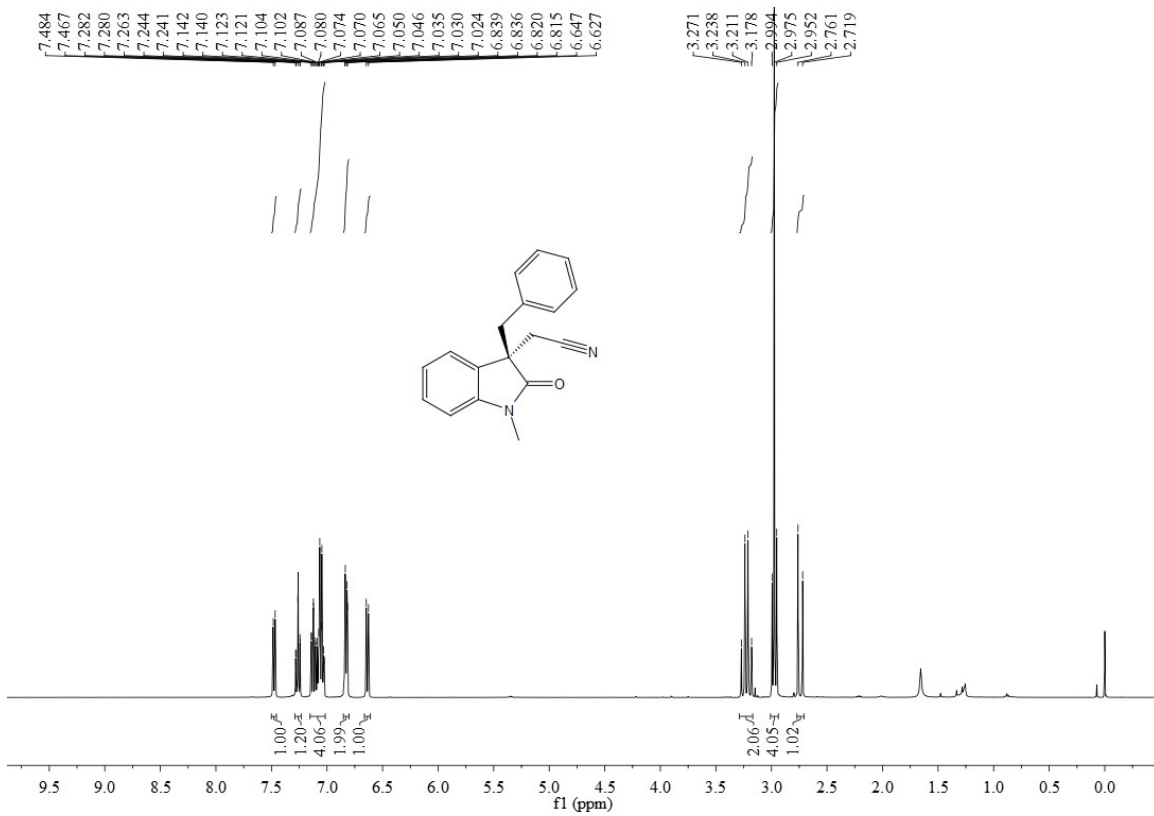

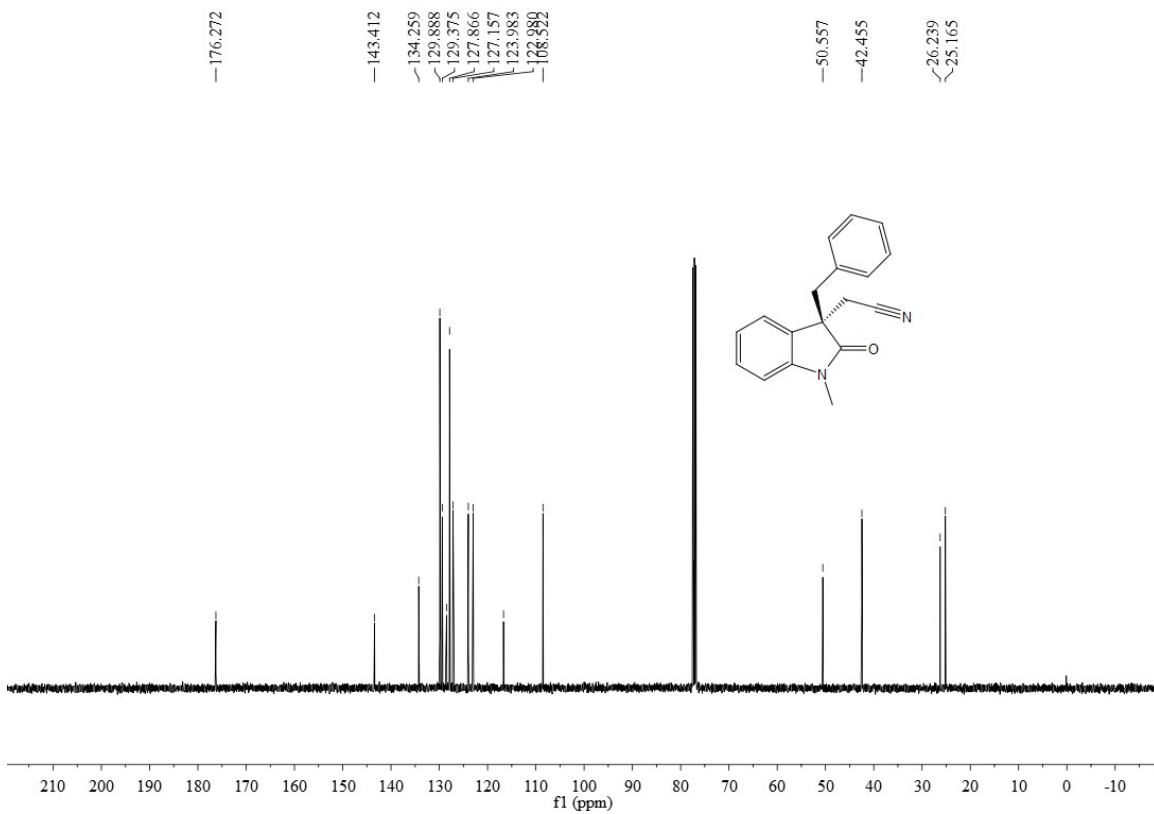

2r

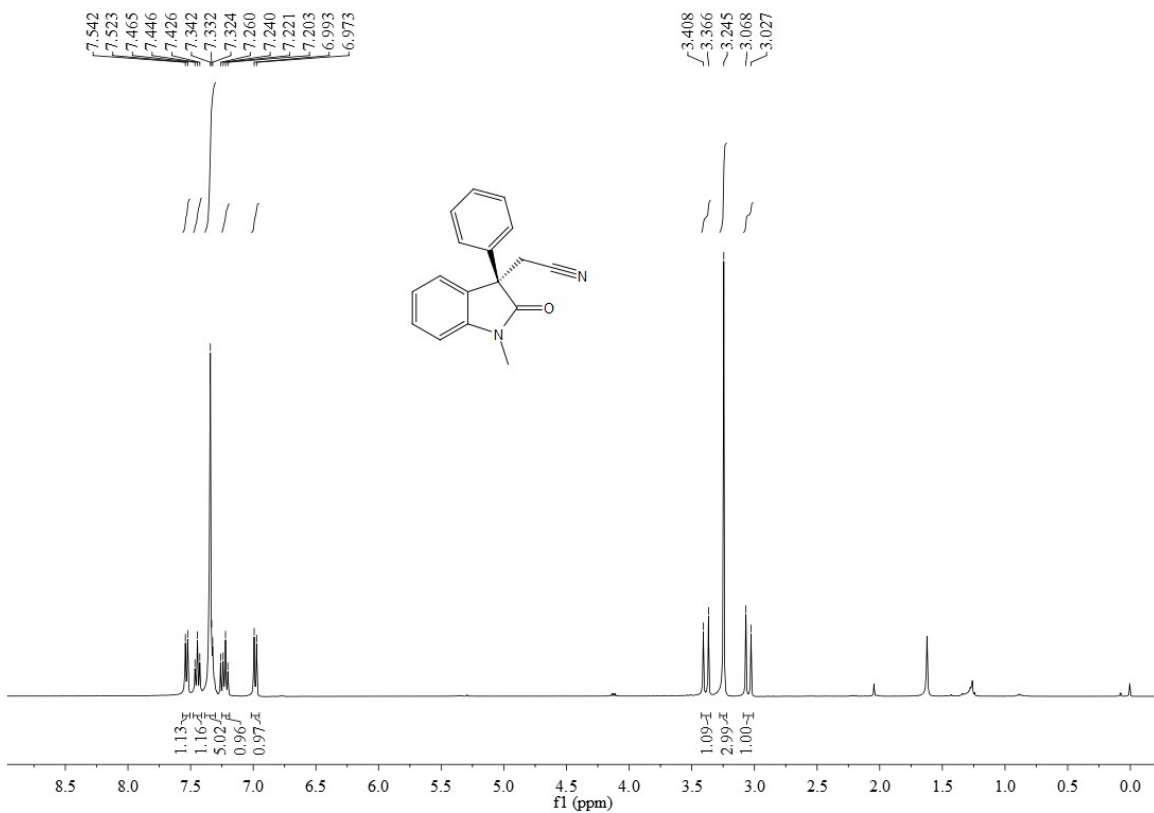

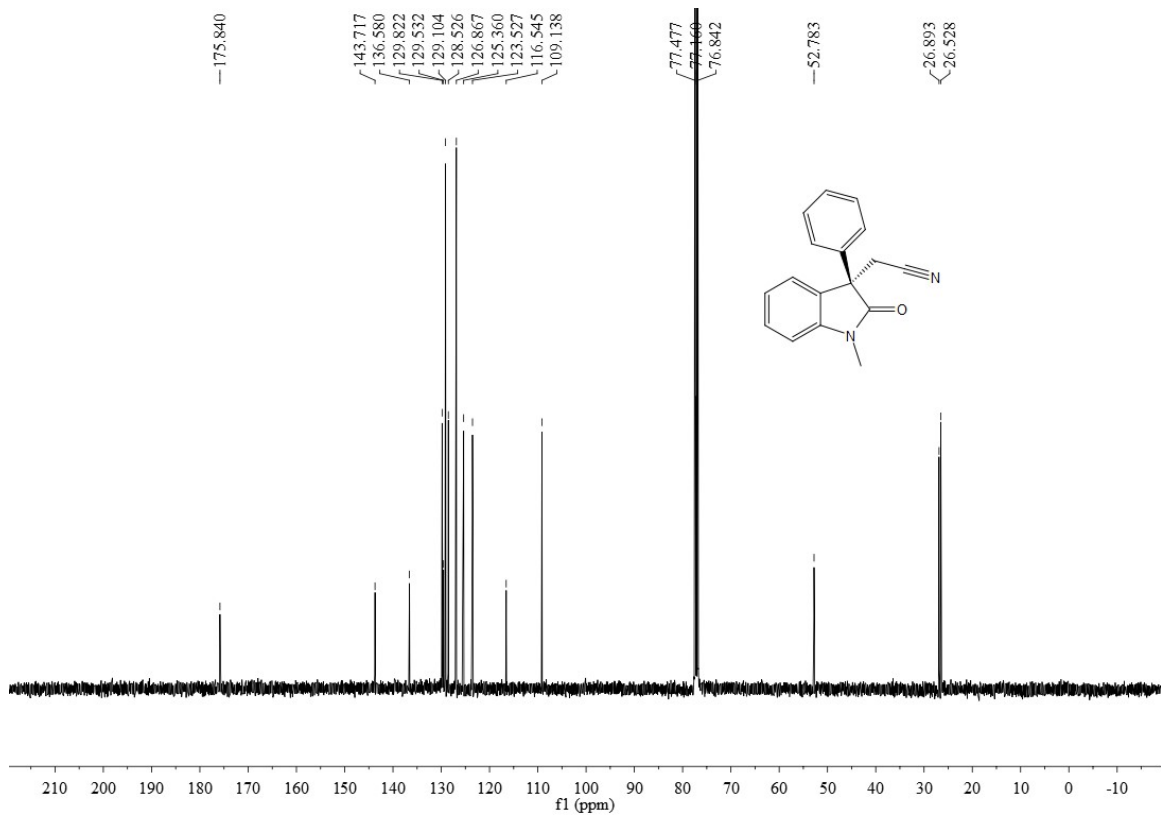

2s

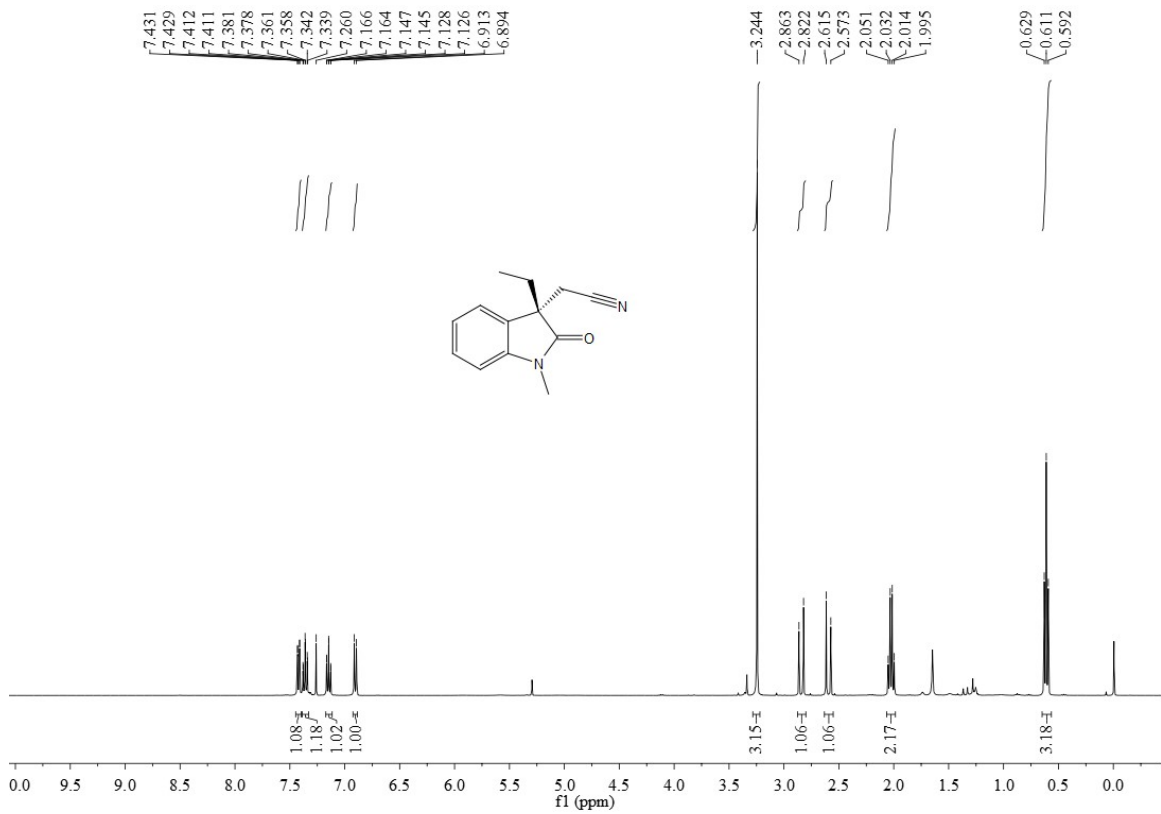

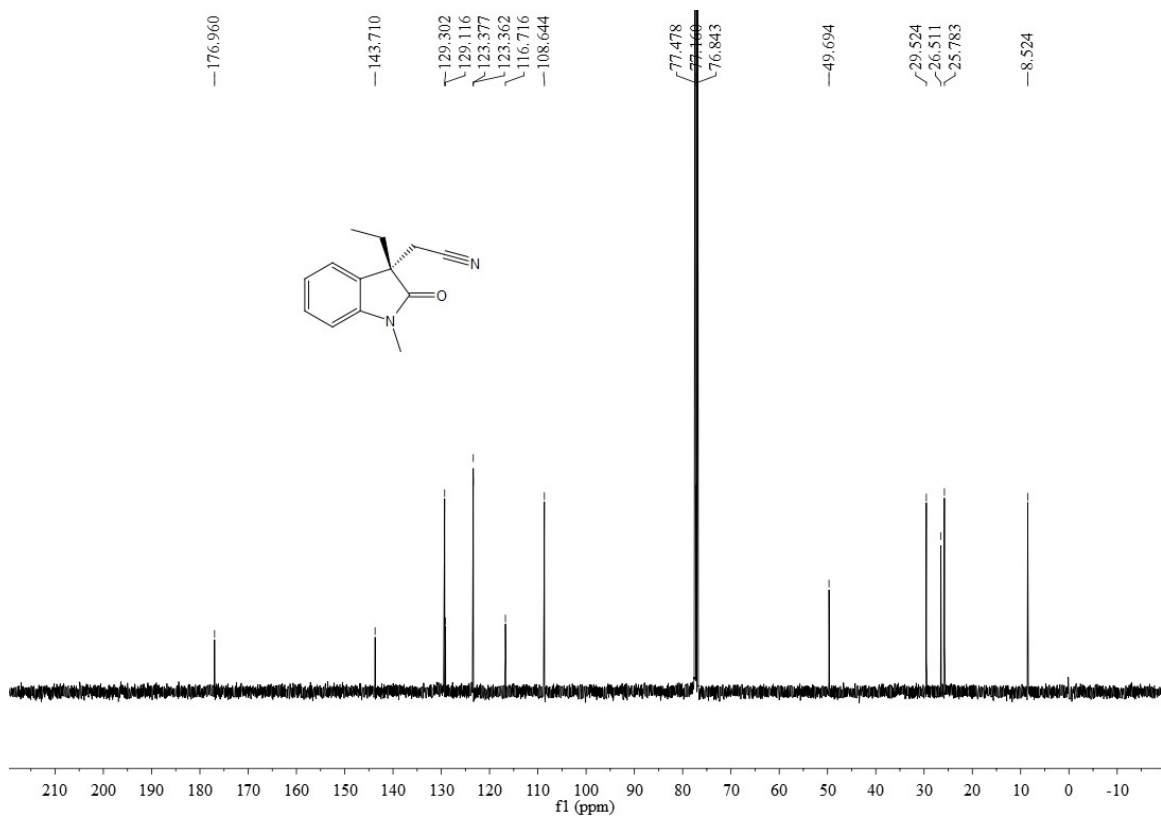

2t

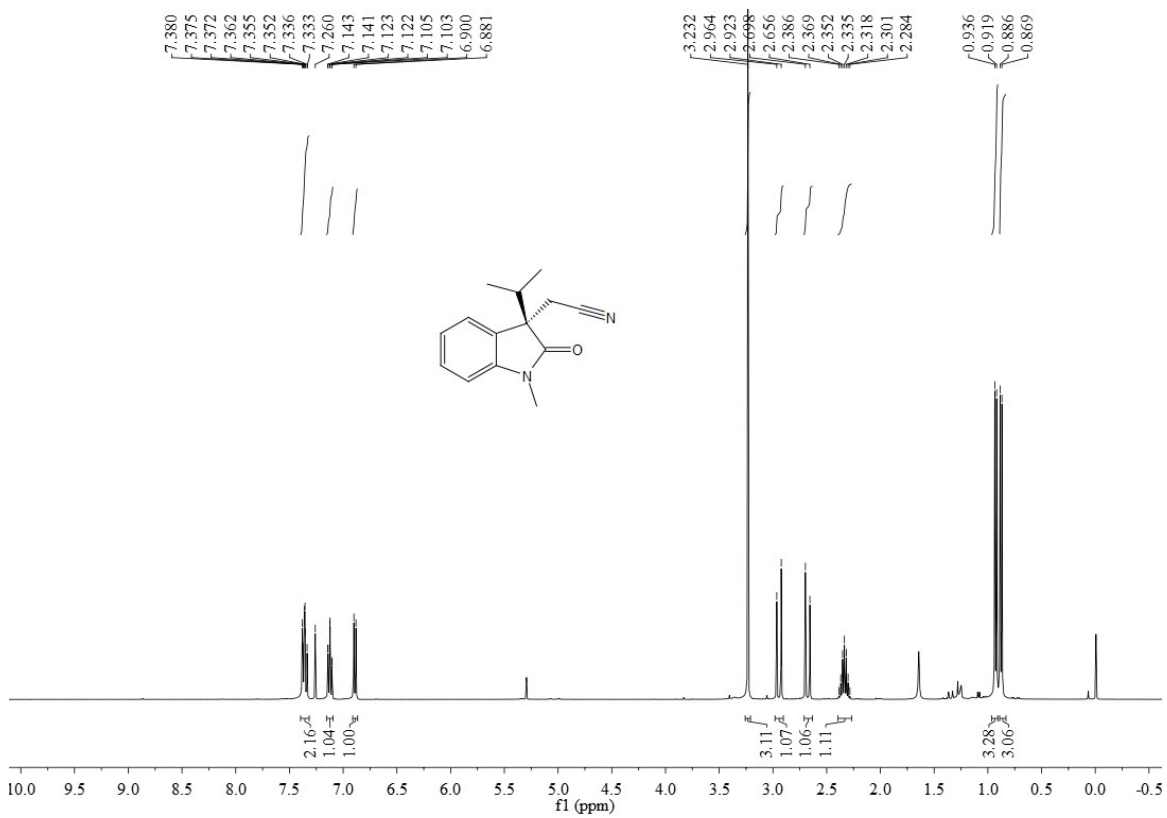

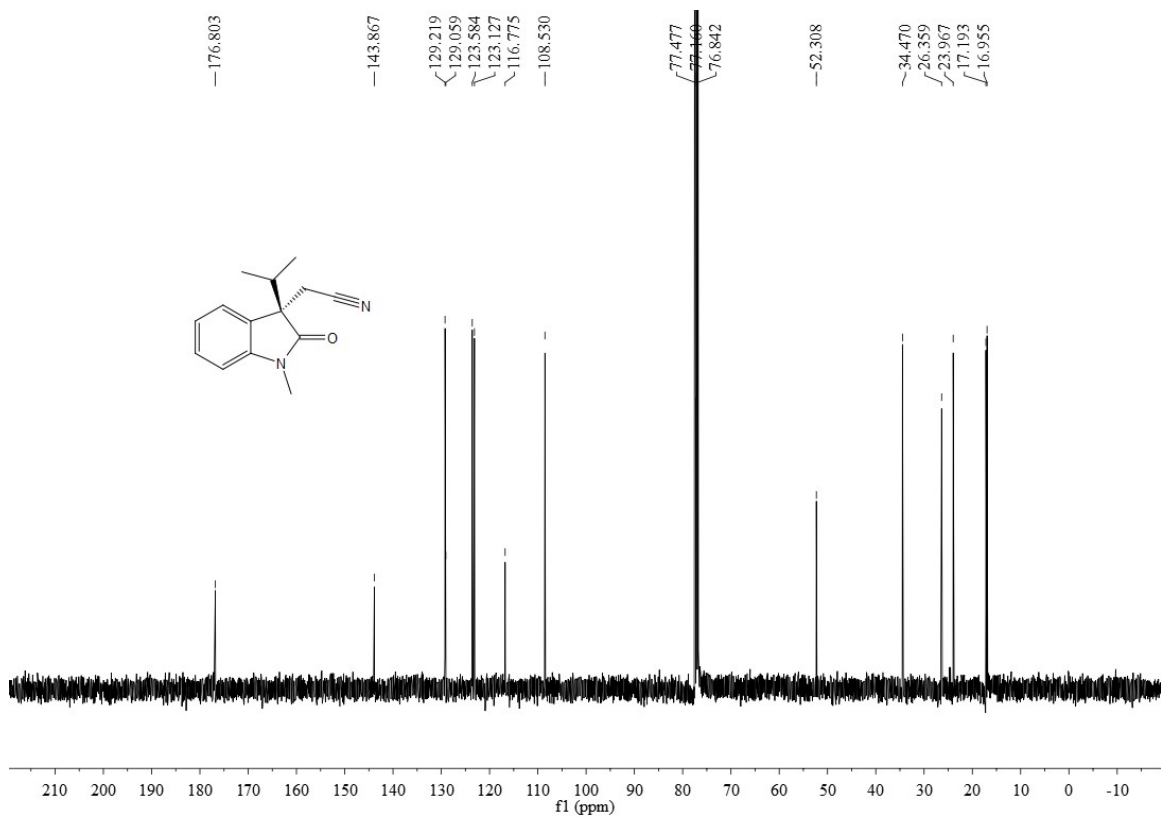

3

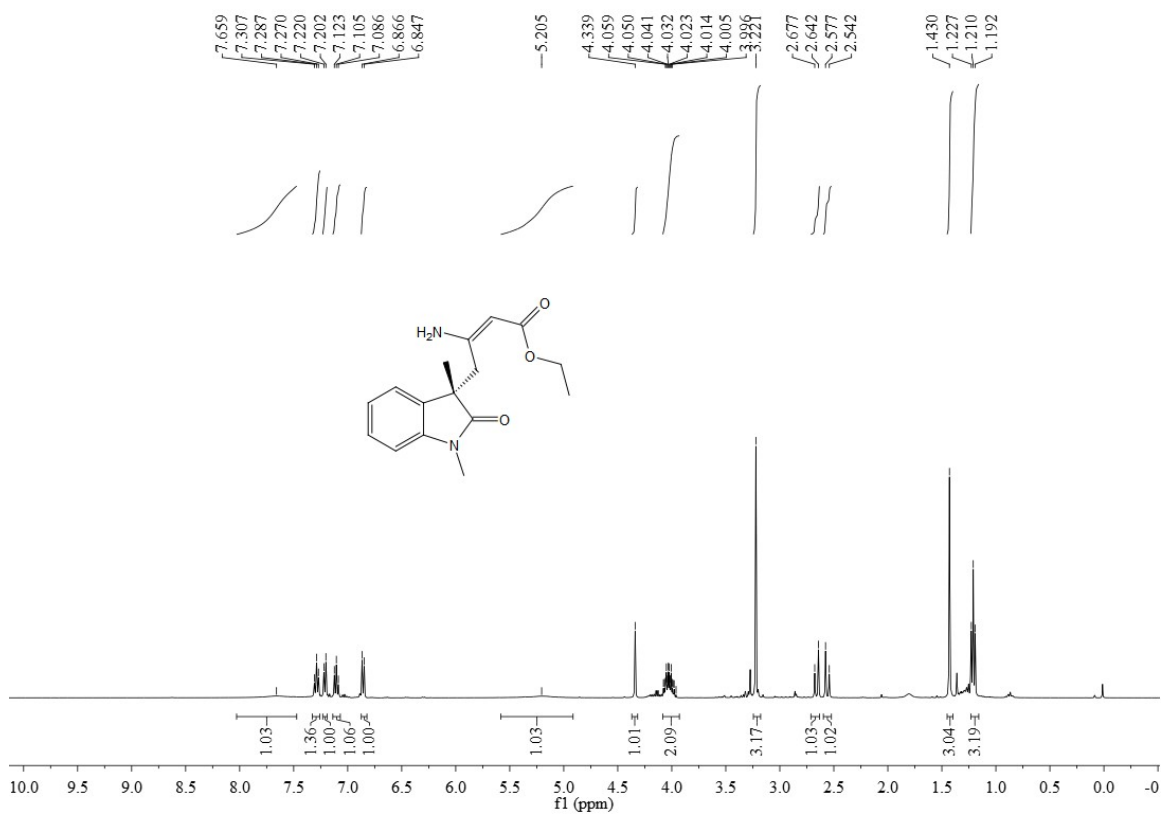



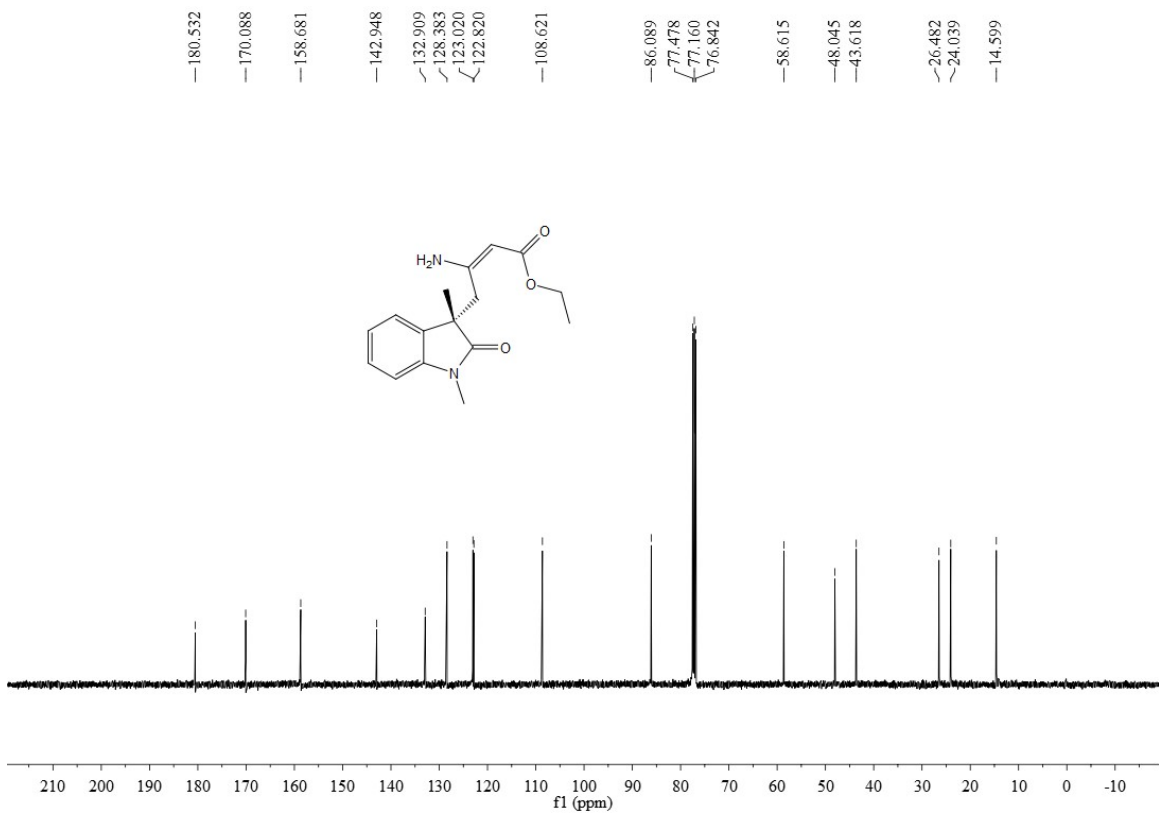

4

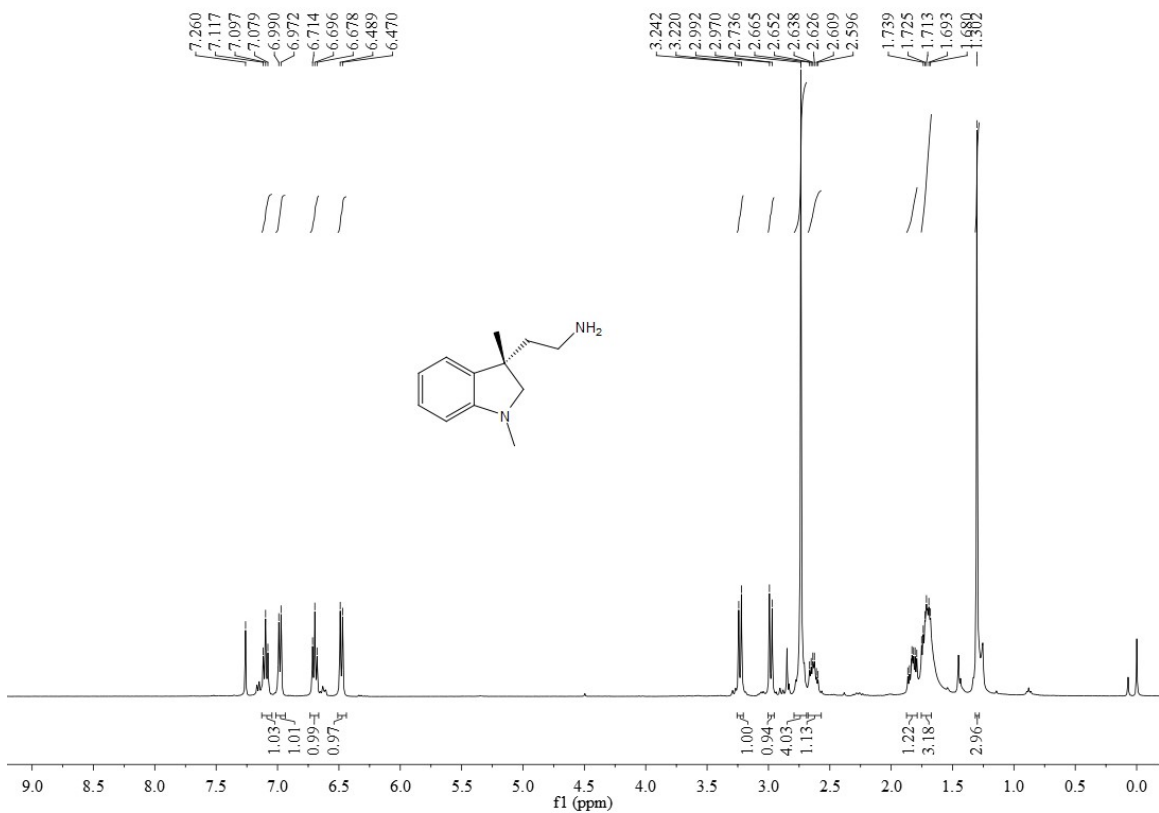

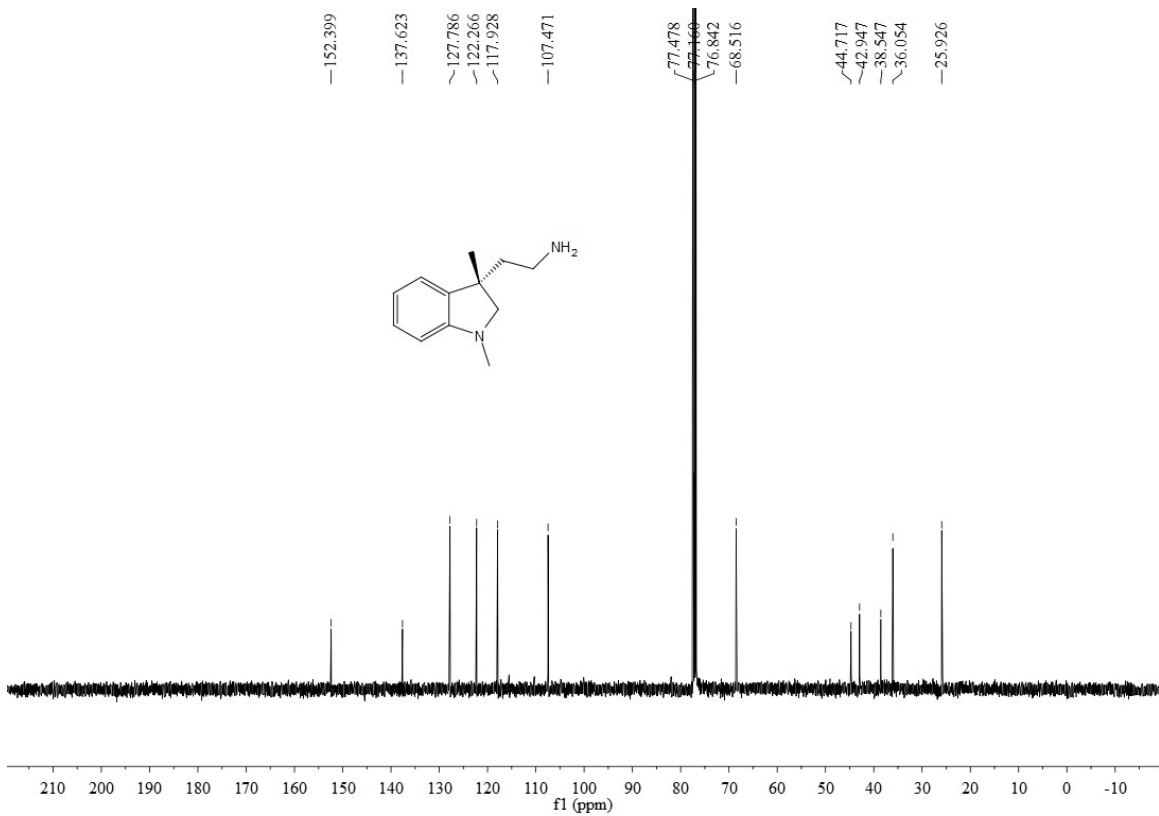

5

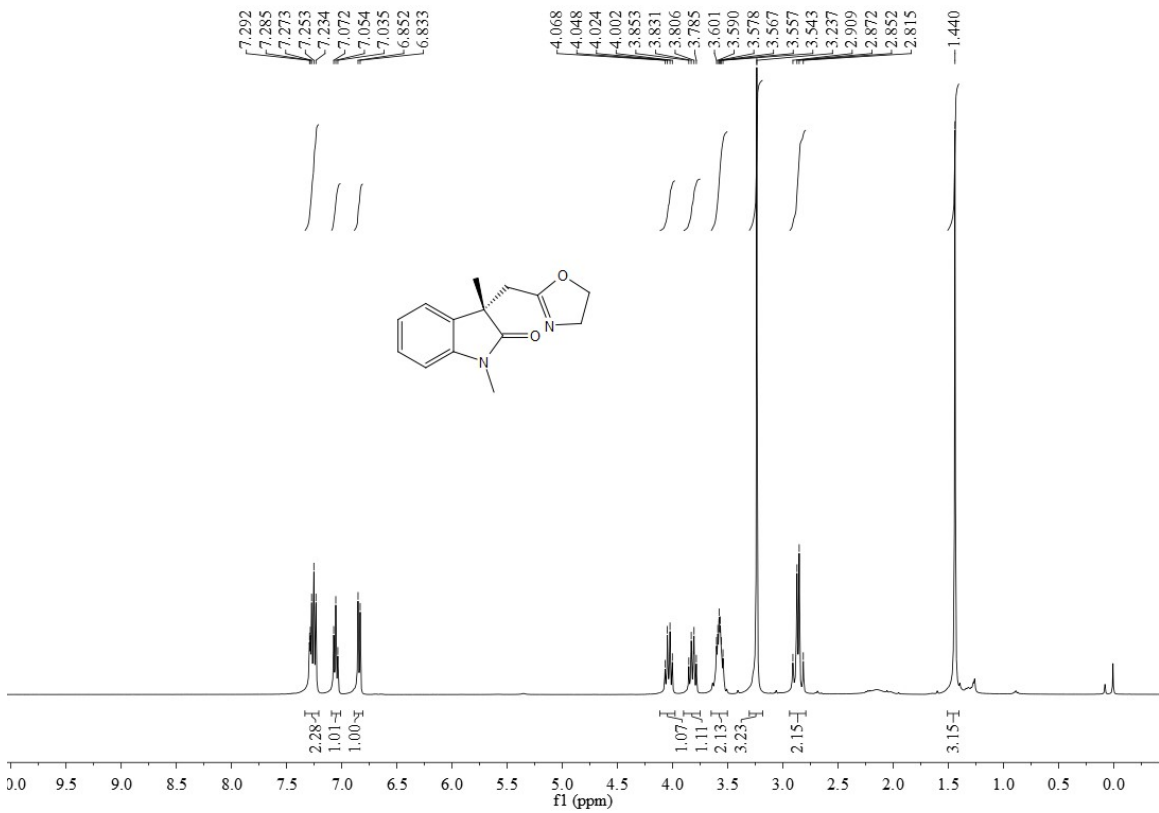

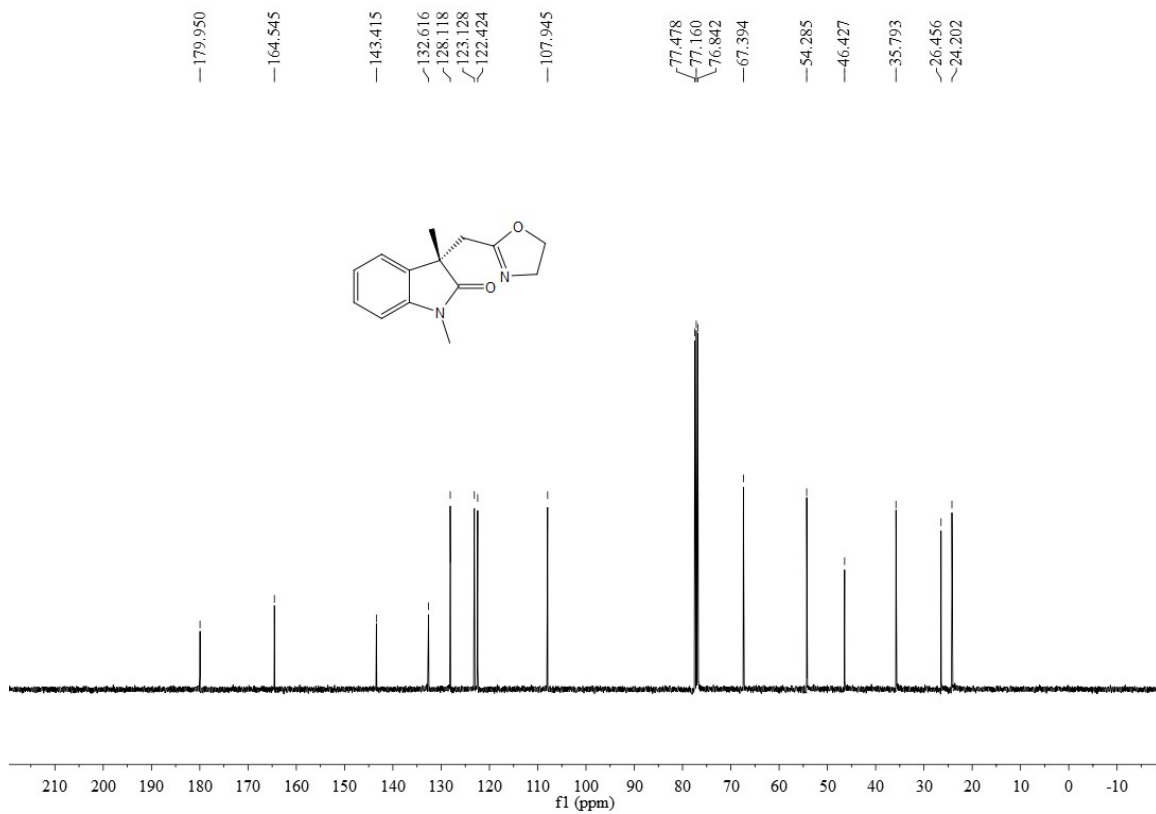

6

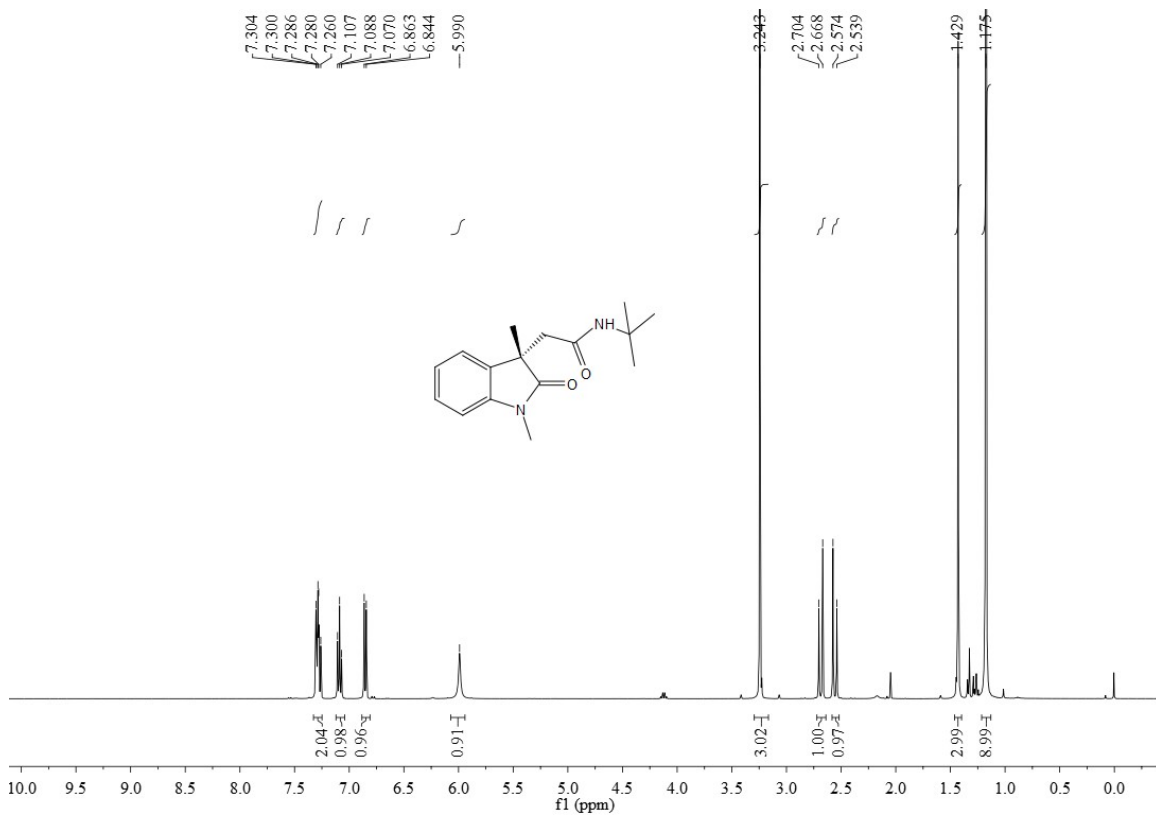

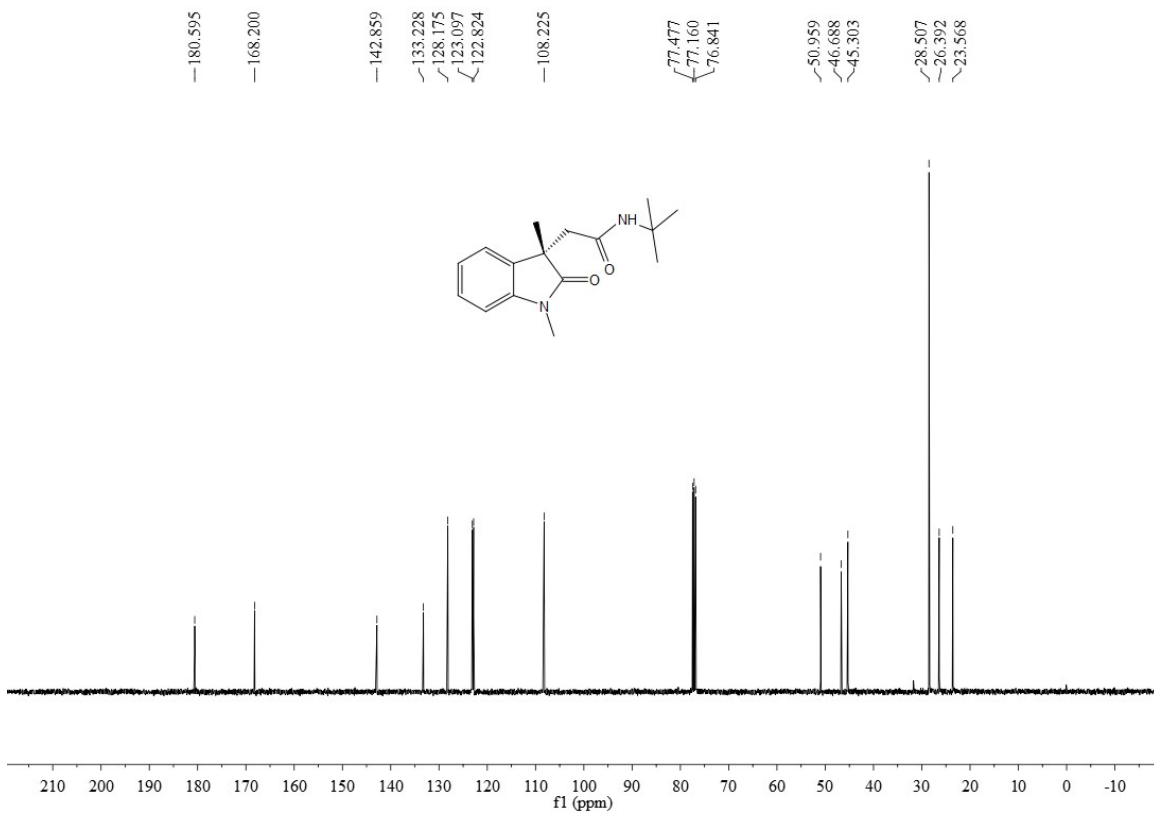

7

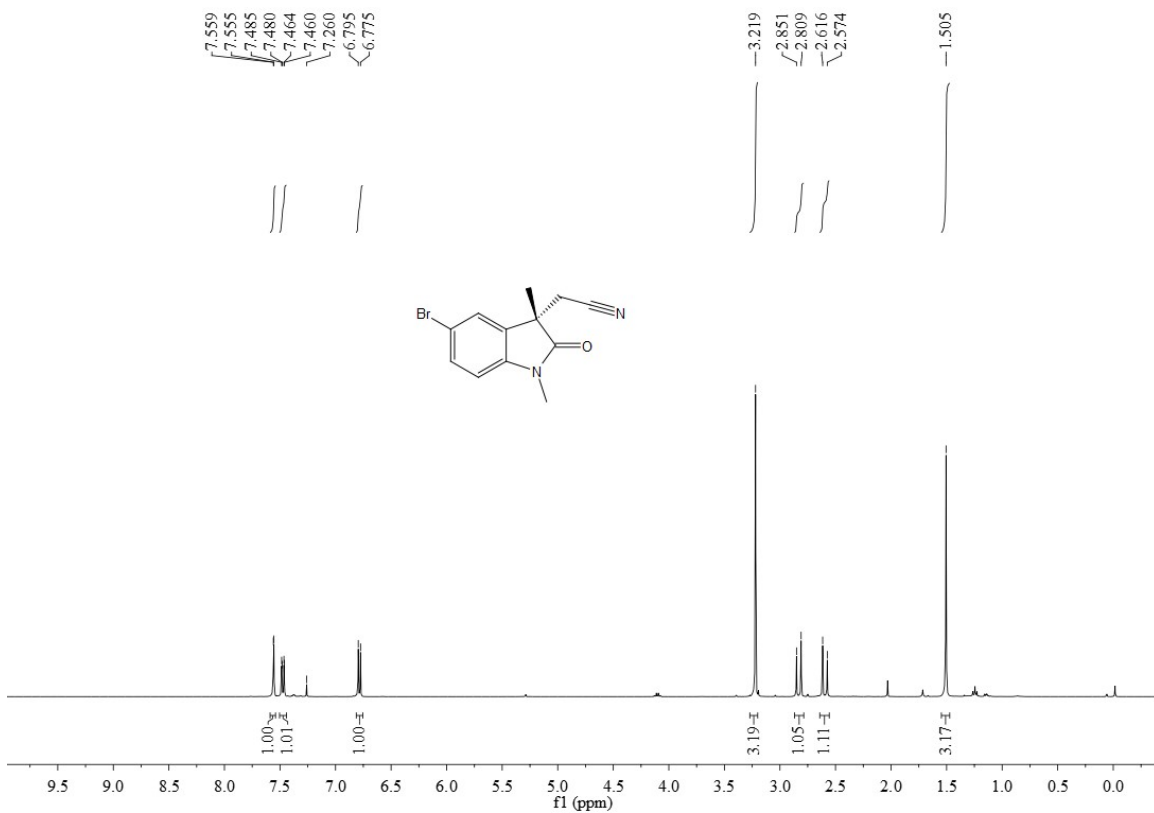

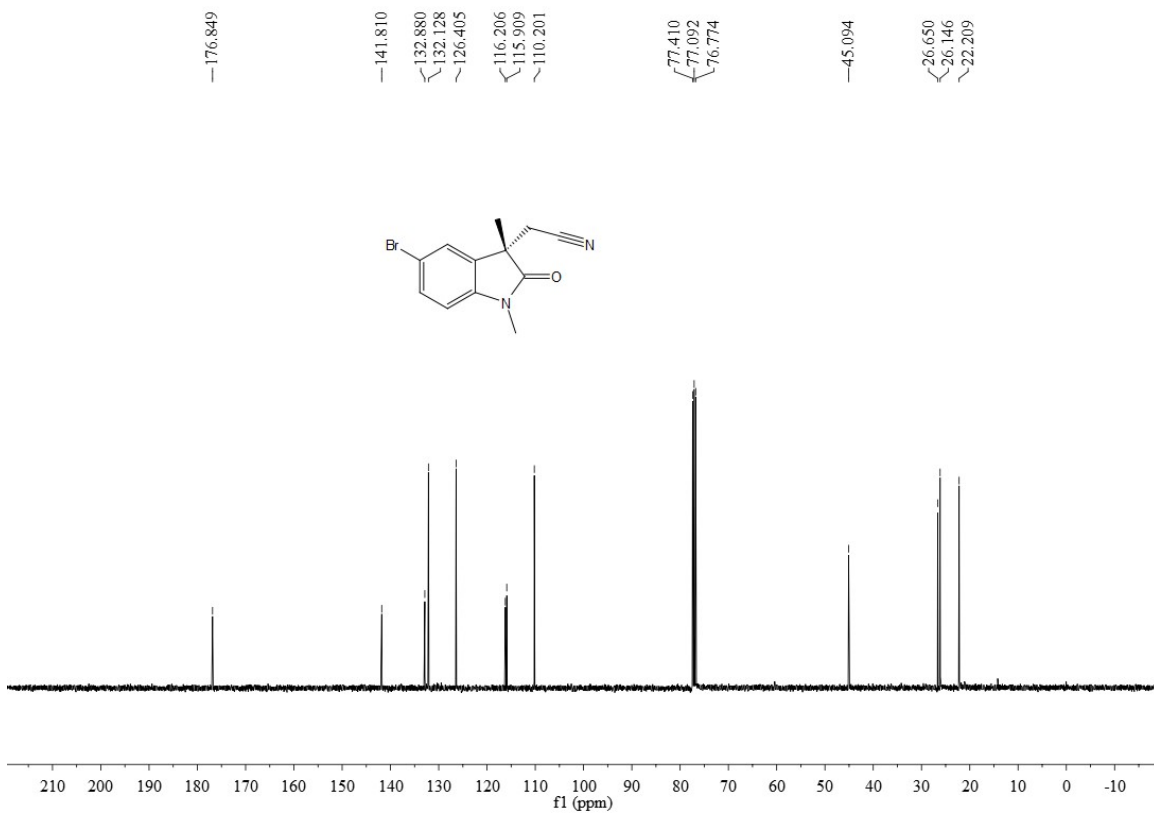

8

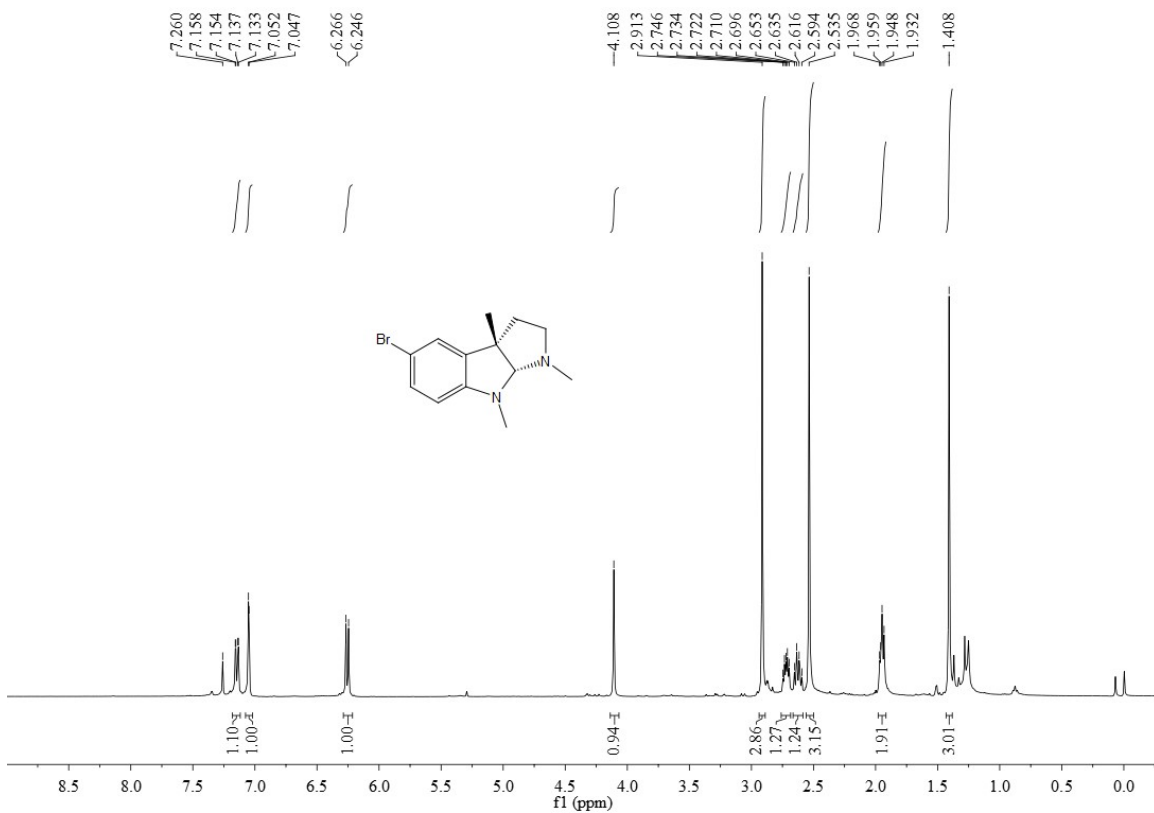

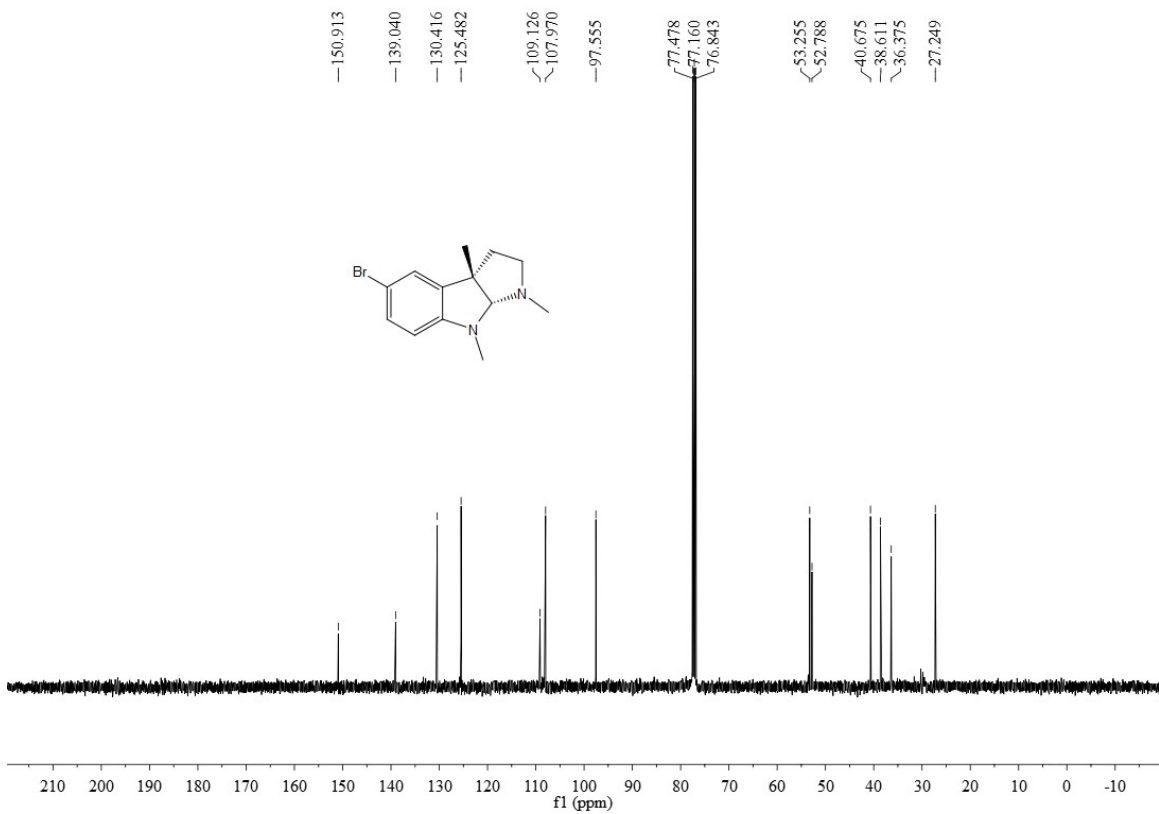

### Esermethole

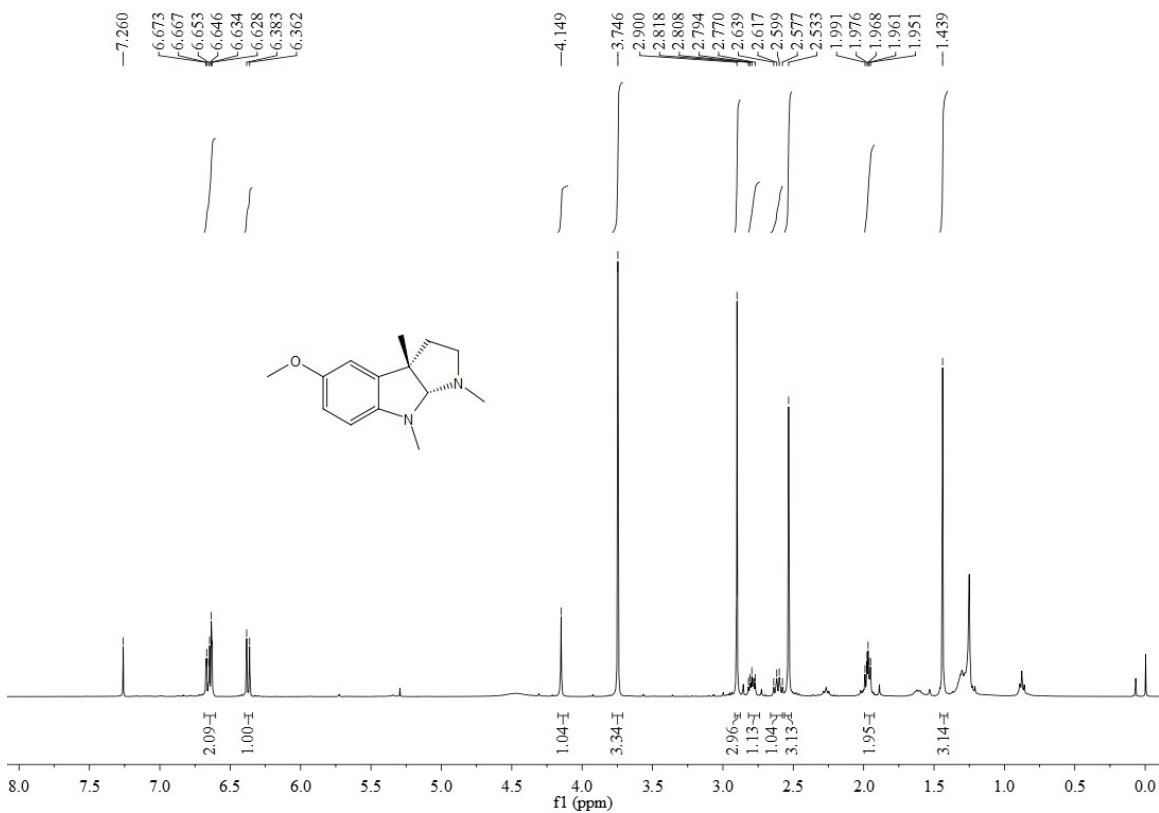

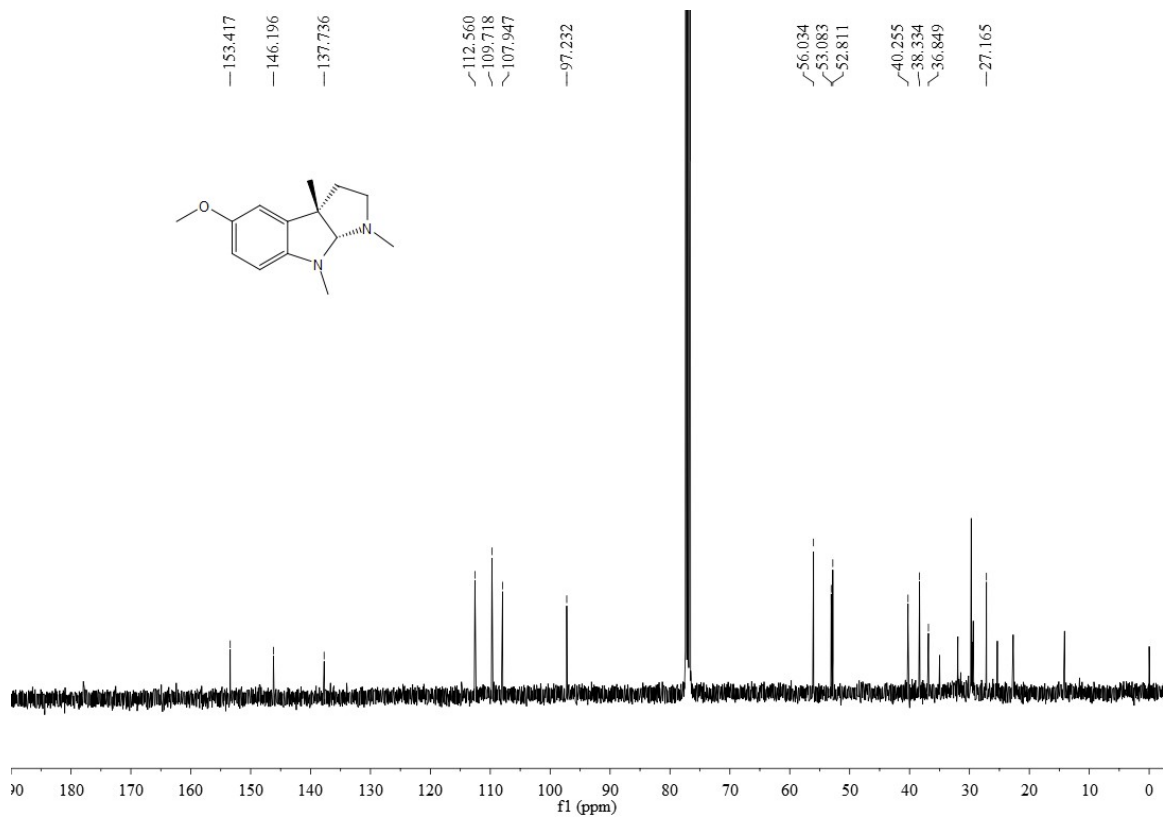

9

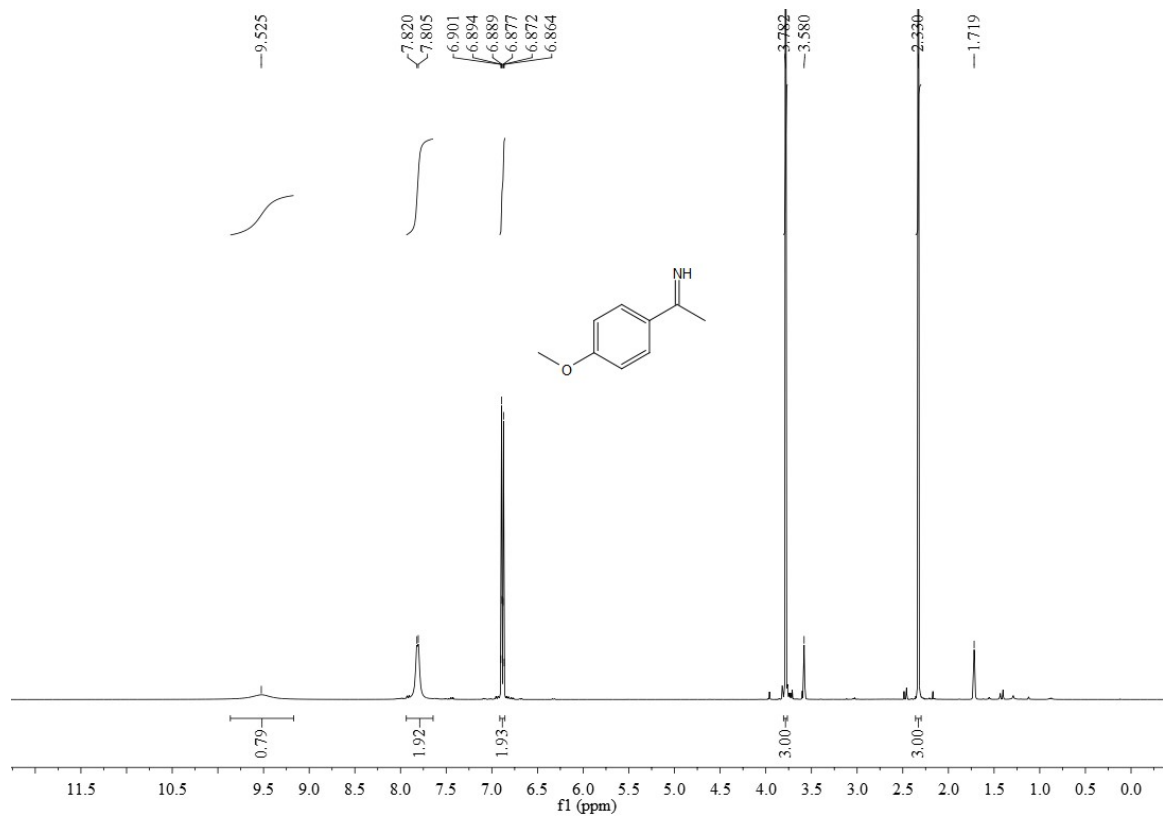

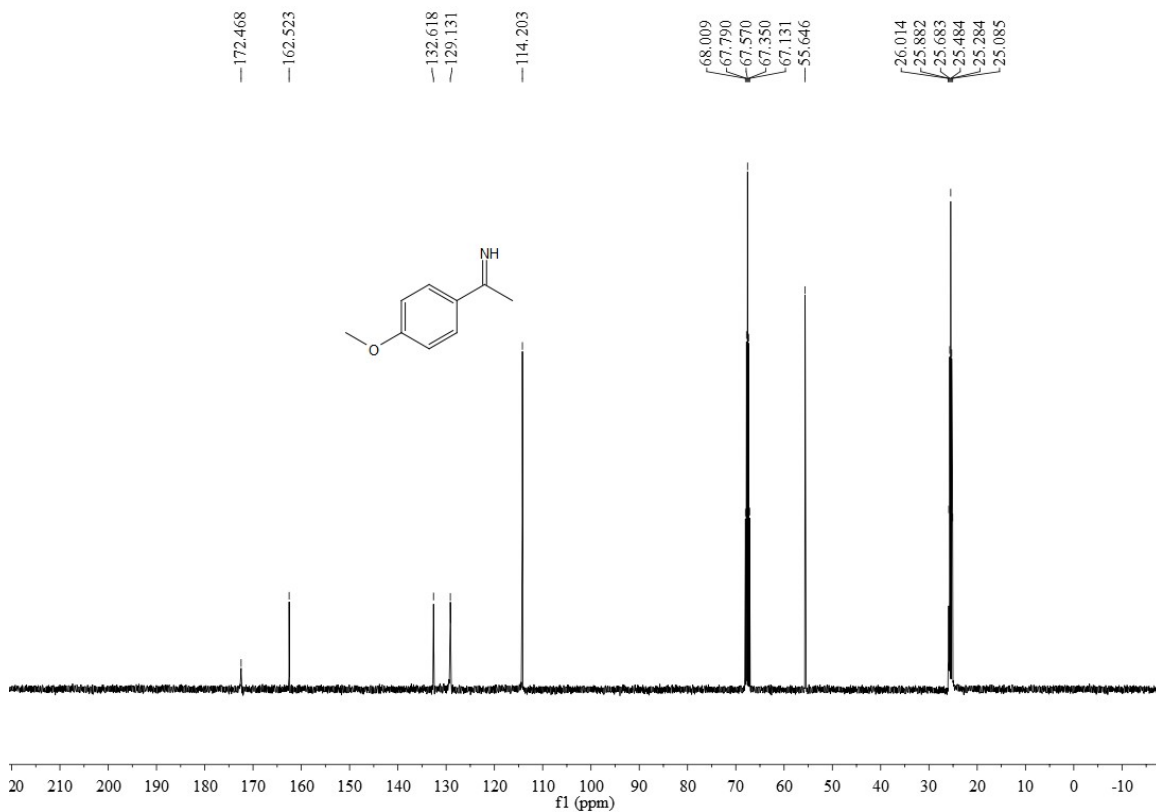

## 9、The GC-MS date

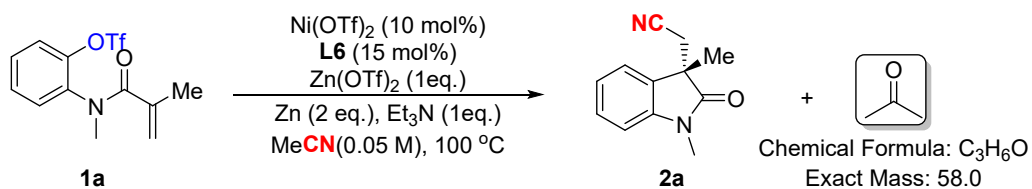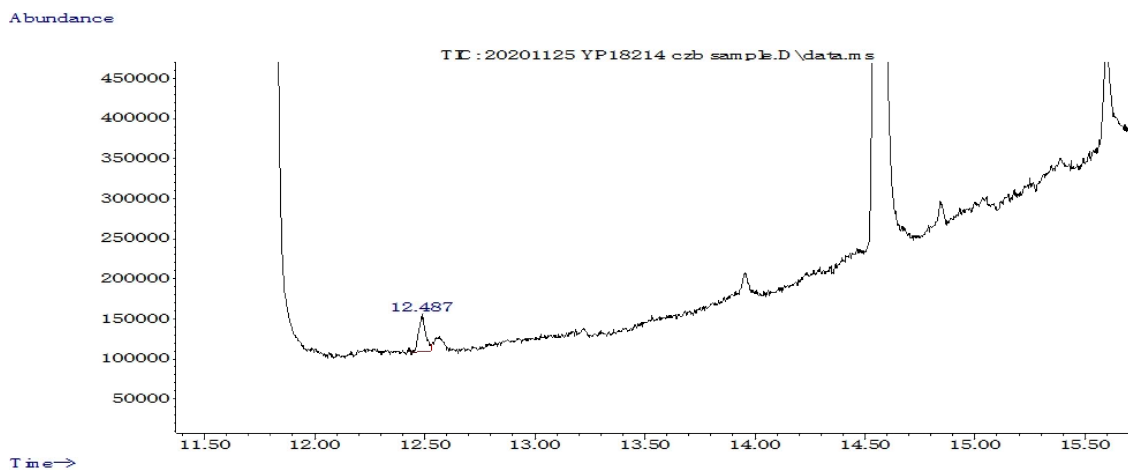



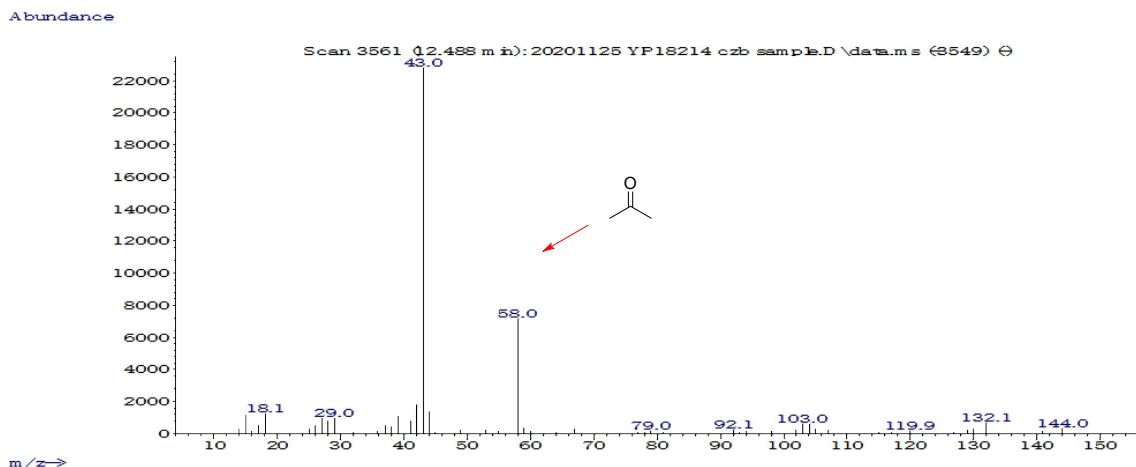

## 10. X-Ray crystallographic data

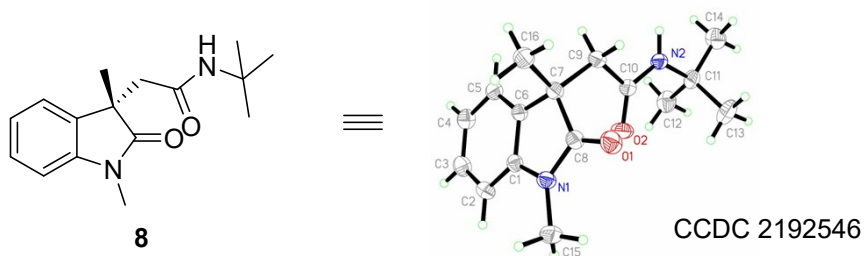

**Table 1-8.** Crystal data and structure refinement for **8**.

|                             |                                                                                                                        |
|-----------------------------|------------------------------------------------------------------------------------------------------------------------|
| Identification code         | <b>8</b>                                                                                                               |
| Empirical formula           | C <sub>16</sub> H <sub>22</sub> N <sub>2</sub> O <sub>2</sub>                                                          |
| Formula weight              | 274.35                                                                                                                 |
| Temperature                 | 173(2) K                                                                                                               |
| Wavelength                  | 1.54178 Å                                                                                                              |
| Crystal system, space group | Monoclinic, P2(1)                                                                                                      |
| Unit cell dimensions        | a = 8.7602(4) Å    alpha = 90 deg.<br>b = 9.7822(4) Å    beta = 114.580(2) deg.<br>c = 10.3505(4) Å    gamma = 90 deg. |
| Volume                      | 806.60(6) Å <sup>3</sup>                                                                                               |
| Z, Calculated density       | 2, 1.130 Mg/m <sup>3</sup>                                                                                             |
| Absorption coefficient      | 0.597 mm <sup>-1</sup>                                                                                                 |
| F(000)                      | 296                                                                                                                    |
| Crystal size                | 0.180 x 0.160 x 0.140 mm                                                                                               |

|                                   |                                             |
|-----------------------------------|---------------------------------------------|
| Theta range for data collection   | 4.698 to 68.353 deg.                        |
| Limiting indices                  | -10<=h<=10, -11<=k<=11, -12<=l<=12          |
| Reflections collected / unique    | 11696 / 2932 [R(int) = 0.0636]              |
| Completeness to theta = 67.679    | 99.9 %                                      |
| Absorption correction             | Semi-empirical from equivalents             |
| Max. and min. transmission        | 0.7531 and 0.5876                           |
| Refinement method                 | Full-matrix least-squares on F <sup>2</sup> |
| Data / restraints / parameters    | 2932 / 1 / 186                              |
| Goodness-of-fit on F <sup>2</sup> | 1.027                                       |
| Final R indices [I>2sigma(I)]     | R1 = 0.0374, wR2 = 0.0904                   |
| R indices (all data)              | R1 = 0.0455, wR2 = 0.0959                   |
| Absolute structure parameter      | 0.21(18)                                    |
| Extinction coefficient            | n/a                                         |
| Largest diff. peak and hole       | 0.125 and -0.199 e.A <sup>-3</sup>          |

**Table 2-8.** Atomic coordinates (x 10<sup>4</sup>) and equivalent isotropic displacement parameters (A<sup>2</sup> x 10<sup>3</sup>) for **8**.

U(eq) is defined as one third of the trace of the orthogonalized U<sub>ij</sub> tensor.

|      | x        | y       | z       | U(eq) |
|------|----------|---------|---------|-------|
| O(1) | 10175(2) | 4216(2) | 6664(2) | 42(1) |
| C(1) | 6364(3)  | 4915(2) | 6780(2) | 28(1) |
| N(1) | 7694(3)  | 4032(2) | 6916(2) | 31(1) |
| O(2) | 6777(3)  | 5172(2) | 3827(2) | 48(1) |
| C(2) | 4869(3)  | 4589(3) | 6857(3) | 34(1) |
| N(2) | 7607(2)  | 6836(2) | 2726(2) | 31(1) |
| C(5) | 5600(3)  | 7279(3) | 6334(3) | 34(1) |
| C(4) | 4084(3)  | 6964(3) | 6411(3) | 39(1) |
| C(3) | 3730(3)  | 5645(3) | 6660(3) | 39(1) |
| C(6) | 6737(3)  | 6240(3) | 6513(2) | 28(1) |
| C(8) | 8901(3)  | 4725(3) | 6683(3) | 31(1) |
| C(7) | 8486(3)  | 6245(3) | 6555(3) | 30(1) |

|       |         |         |         |       |
|-------|---------|---------|---------|-------|
| C(9)  | 8652(3) | 6897(3) | 5278(3) | 32(1) |
| C(10) | 7584(3) | 6215(3) | 3874(3) | 32(1) |
| C(11) | 6784(3) | 6340(3) | 1247(3) | 35(1) |
| C(12) | 4892(4) | 6217(4) | 775(3)  | 50(1) |
| C(13) | 7530(5) | 4976(4) | 1106(4) | 58(1) |
| C(14) | 7122(4) | 7412(4) | 331(3)  | 50(1) |
| C(15) | 7746(3) | 2578(3) | 7220(3) | 39(1) |
| C(16) | 9731(3) | 6924(3) | 7931(3) | 39(1) |

---

**Table 3-8.** Bond lengths [Å] and angles [deg] for **8**.

---

|                |          |
|----------------|----------|
| O(1)-C(8)      | 1.229(3) |
| C(1)-C(2)      | 1.382(3) |
| C(1)-C(6)      | 1.392(4) |
| C(1)-N(1)      | 1.409(3) |
| N(1)-C(8)      | 1.360(3) |
| N(1)-C(15)     | 1.453(3) |
| O(2)-C(10)     | 1.231(3) |
| C(2)-C(3)      | 1.392(4) |
| N(2)-C(10)     | 1.343(3) |
| N(2)-C(11)     | 1.477(3) |
| C(5)-C(6)      | 1.381(4) |
| C(5)-C(4)      | 1.398(4) |
| C(4)-C(3)      | 1.376(4) |
| C(6)-C(7)      | 1.515(3) |
| C(8)-C(7)      | 1.524(4) |
| C(7)-C(9)      | 1.528(3) |
| C(7)-C(16)     | 1.539(3) |
| C(9)-C(10)     | 1.517(4) |
| C(11)-C(13)    | 1.519(4) |
| C(11)-C(14)    | 1.523(4) |
| C(11)-C(12)    | 1.525(4) |
| <br>           |          |
| C(2)-C(1)-C(6) | 122.1(2) |

|                   |            |
|-------------------|------------|
| C(2)-C(1)-N(1)    | 128.0(2)   |
| C(6)-C(1)-N(1)    | 109.8(2)   |
| C(8)-N(1)-C(1)    | 110.37(19) |
| C(8)-N(1)-C(15)   | 124.7(2)   |
| C(1)-N(1)-C(15)   | 124.9(2)   |
| C(1)-C(2)-C(3)    | 117.4(2)   |
| C(10)-N(2)-C(11)  | 126.0(2)   |
| C(6)-C(5)-C(4)    | 118.7(2)   |
| C(3)-C(4)-C(5)    | 120.7(3)   |
| C(4)-C(3)-C(2)    | 121.3(2)   |
| C(5)-C(6)-C(1)    | 119.8(2)   |
| C(5)-C(6)-C(7)    | 131.8(2)   |
| C(1)-C(6)-C(7)    | 108.4(2)   |
| O(1)-C(8)-N(1)    | 125.4(2)   |
| O(1)-C(8)-C(7)    | 125.4(2)   |
| N(1)-C(8)-C(7)    | 109.1(2)   |
| C(6)-C(7)-C(8)    | 101.6(2)   |
| C(6)-C(7)-C(9)    | 115.9(2)   |
| C(8)-C(7)-C(9)    | 112.2(2)   |
| C(6)-C(7)-C(16)   | 110.3(2)   |
| C(8)-C(7)-C(16)   | 106.8(2)   |
| C(9)-C(7)-C(16)   | 109.5(2)   |
| C(10)-C(9)-C(7)   | 113.7(2)   |
| O(2)-C(10)-N(2)   | 124.1(2)   |
| O(2)-C(10)-C(9)   | 121.2(2)   |
| N(2)-C(10)-C(9)   | 114.7(2)   |
| N(2)-C(11)-C(13)  | 110.1(2)   |
| N(2)-C(11)-C(14)  | 106.3(2)   |
| C(13)-C(11)-C(14) | 110.0(2)   |
| N(2)-C(11)-C(12)  | 110.8(2)   |
| C(13)-C(11)-C(12) | 110.7(3)   |
| C(14)-C(11)-C(12) | 108.7(2)   |

---

Symmetry transformations used to generate equivalent atoms:

**Table 4-8.** Anisotropic displacement parameters ( $\text{Å}^2 \times 10^3$ ) for **8**.

The anisotropic displacement factor exponent takes the form:

$$-2 \pi^2 [ h^2 a^{*2} U_{11} + \dots + 2 h k a^* b^* U_{12} ]$$

---

|       | U11   | U22   | U33   | U23    | U13   | U12    |
|-------|-------|-------|-------|--------|-------|--------|
| O(1)  | 38(1) | 41(1) | 52(1) | 6(1)   | 25(1) | 6(1)   |
| C(1)  | 29(1) | 31(1) | 22(1) | 0(1)   | 10(1) | 0(1)   |
| N(1)  | 33(1) | 27(1) | 34(1) | 4(1)   | 15(1) | 1(1)   |
| O(2)  | 70(1) | 36(1) | 38(1) | -3(1)  | 22(1) | -20(1) |
| C(2)  | 33(1) | 36(2) | 35(1) | 4(1)   | 15(1) | -4(1)  |
| N(2)  | 38(1) | 26(1) | 29(1) | 0(1)   | 15(1) | -2(1)  |
| C(5)  | 40(1) | 31(1) | 31(1) | 1(1)   | 15(1) | 0(1)   |
| C(4)  | 35(1) | 42(2) | 39(2) | 2(1)   | 15(1) | 7(1)   |
| C(3)  | 32(1) | 48(2) | 39(2) | 3(1)   | 16(1) | 2(1)   |
| C(6)  | 32(1) | 29(1) | 24(1) | 0(1)   | 12(1) | -2(1)  |
| C(8)  | 32(1) | 32(1) | 30(1) | 1(1)   | 14(1) | 0(1)   |
| C(7)  | 30(1) | 31(1) | 29(1) | -1(1)  | 13(1) | -3(1)  |
| C(9)  | 36(1) | 30(1) | 32(1) | 1(1)   | 16(1) | -4(1)  |
| C(10) | 36(1) | 28(1) | 32(1) | 0(1)   | 16(1) | -1(1)  |
| C(11) | 40(1) | 37(1) | 28(1) | -3(1)  | 13(1) | 4(1)   |
| C(12) | 45(2) | 62(2) | 40(2) | -10(2) | 13(1) | -4(2)  |
| C(13) | 78(2) | 49(2) | 46(2) | -8(1)  | 25(2) | 18(2)  |
| C(14) | 60(2) | 57(2) | 32(2) | 5(1)   | 17(1) | -3(2)  |
| C(15) | 41(2) | 30(1) | 44(2) | 7(1)   | 16(1) | 2(1)   |
| C(16) | 38(1) | 44(2) | 32(1) | -6(1)  | 12(1) | -10(1) |

---

**Table 5-8.** Hydrogen coordinates ( x 10<sup>4</sup>) and isotropic displacement parameters (A<sup>2</sup> x 10<sup>3</sup>) for **8**.

---

|  | x | y | z | U(eq) |
|--|---|---|---|-------|
|--|---|---|---|-------|

---

|        |       |      |      |    |
|--------|-------|------|------|----|
| H(2)   | 4629  | 3680 | 7037 | 41 |
| H(2A)  | 8164  | 7611 | 2868 | 37 |
| H(5)   | 5843  | 8190 | 6161 | 41 |
| H(4)   | 3290  | 7669 | 6291 | 46 |
| H(3)   | 2686  | 5452 | 6698 | 47 |
| H(9A)  | 8329  | 7872 | 5225 | 38 |
| H(9B)  | 9843  | 6858 | 5428 | 38 |
| H(12A) | 4375  | 5867 | -201 | 76 |
| H(12B) | 4425  | 7118 | 813  | 76 |
| H(12C) | 4662  | 5587 | 1408 | 76 |
| H(13A) | 7029  | 4686 | 109  | 87 |
| H(13B) | 7296  | 4290 | 1690 | 87 |
| H(13C) | 8747  | 5073 | 1428 | 87 |
| H(14A) | 6627  | 7114 | -663 | 75 |
| H(14B) | 8336  | 7527 | 652  | 75 |
| H(14C) | 6620  | 8284 | 415  | 75 |
| H(15A) | 6673  | 2159 | 6603 | 58 |
| H(15B) | 7946  | 2446 | 8217 | 58 |
| H(15C) | 8655  | 2150 | 7046 | 58 |
| H(16A) | 10873 | 6837 | 7992 | 58 |
| H(16B) | 9663  | 6474 | 8752 | 58 |
| H(16C) | 9448  | 7894 | 7927 | 58 |

---

**Table 6-8.** Torsion angles [deg] for **8**.

---

|                      |           |
|----------------------|-----------|
| C(2)-C(1)-N(1)-C(8)  | 176.0(2)  |
| C(6)-C(1)-N(1)-C(8)  | -2.8(3)   |
| C(2)-C(1)-N(1)-C(15) | -2.3(4)   |
| C(6)-C(1)-N(1)-C(15) | 179.0(2)  |
| C(6)-C(1)-C(2)-C(3)  | -0.2(4)   |
| N(1)-C(1)-C(2)-C(3)  | -178.8(2) |
| C(6)-C(5)-C(4)-C(3)  | -0.1(4)   |

|                        |           |
|------------------------|-----------|
| C(5)-C(4)-C(3)-C(2)    | 0.7(4)    |
| C(1)-C(2)-C(3)-C(4)    | -0.6(4)   |
| C(4)-C(5)-C(6)-C(1)    | -0.7(4)   |
| C(4)-C(5)-C(6)-C(7)    | -177.0(2) |
| C(2)-C(1)-C(6)-C(5)    | 0.8(4)    |
| N(1)-C(1)-C(6)-C(5)    | 179.6(2)  |
| C(2)-C(1)-C(6)-C(7)    | 177.9(2)  |
| N(1)-C(1)-C(6)-C(7)    | -3.2(3)   |
| C(1)-N(1)-C(8)-O(1)    | -176.5(2) |
| C(15)-N(1)-C(8)-O(1)   | 1.8(4)    |
| C(1)-N(1)-C(8)-C(7)    | 7.5(3)    |
| C(15)-N(1)-C(8)-C(7)   | -174.2(2) |
| C(5)-C(6)-C(7)-C(8)    | -176.2(3) |
| C(1)-C(6)-C(7)-C(8)    | 7.1(2)    |
| C(5)-C(6)-C(7)-C(9)    | -54.3(4)  |
| C(1)-C(6)-C(7)-C(9)    | 129.0(2)  |
| C(5)-C(6)-C(7)-C(16)   | 70.8(3)   |
| C(1)-C(6)-C(7)-C(16)   | -105.9(2) |
| O(1)-C(8)-C(7)-C(6)    | 175.2(2)  |
| N(1)-C(8)-C(7)-C(6)    | -8.8(2)   |
| O(1)-C(8)-C(7)-C(9)    | 50.8(3)   |
| N(1)-C(8)-C(7)-C(9)    | -133.2(2) |
| O(1)-C(8)-C(7)-C(16)   | -69.2(3)  |
| N(1)-C(8)-C(7)-C(16)   | 106.7(2)  |
| C(6)-C(7)-C(9)-C(10)   | -59.6(3)  |
| C(8)-C(7)-C(9)-C(10)   | 56.5(3)   |
| C(16)-C(7)-C(9)-C(10)  | 174.9(2)  |
| C(11)-N(2)-C(10)-O(2)  | -4.4(4)   |
| C(11)-N(2)-C(10)-C(9)  | 175.4(2)  |
| C(7)-C(9)-C(10)-O(2)   | -5.2(3)   |
| C(7)-C(9)-C(10)-N(2)   | 175.0(2)  |
| C(10)-N(2)-C(11)-C(13) | -62.6(3)  |
| C(10)-N(2)-C(11)-C(14) | 178.2(2)  |
| C(10)-N(2)-C(11)-C(12) | 60.2(3)   |

---

Symmetry transformations used to generate equivalent atoms:

**Table 7-8.** Hydrogen bonds for **8** [A and deg.].

---

| D-H...A | d(D-H) | d(H...A) | d(D...A) | <(DHA) |
|---------|--------|----------|----------|--------|
|---------|--------|----------|----------|--------|

  

|                                                                                                |   |                                                                                    |  |  |
|------------------------------------------------------------------------------------------------|---|------------------------------------------------------------------------------------|--|--|
| <br><b>11</b> | ≡ |  |  |  |
|------------------------------------------------------------------------------------------------|---|------------------------------------------------------------------------------------|--|--|

CCDC 2192547

**Table 1-11.** Crystal data and structure refinement for **11**.

|                                 |                                                                                                                                |
|---------------------------------|--------------------------------------------------------------------------------------------------------------------------------|
| Identification code             | <b>11</b>                                                                                                                      |
| Empirical formula               | C <sub>54</sub> H <sub>53</sub> F <sub>3</sub> N Ni O <sub>4</sub> P <sub>2</sub> S                                            |
| Formula weight                  | 989.68                                                                                                                         |
| Temperature                     | 173(2) K                                                                                                                       |
| Wavelength                      | 1.54178 Å                                                                                                                      |
| Crystal system, space group     | Triclinic, P-1                                                                                                                 |
| Unit cell dimensions            | a = 12.3940(7) Å    alpha = 79.158(2) deg.<br>b = 13.4581(7) Å    beta = 69.71 deg.<br>c = 17.8731(13) Å    gamma = 62.58 deg. |
| Volume                          | 2480.8(3) Å <sup>3</sup>                                                                                                       |
| Z, Calculated density           | 2, 1.325 Mg/m <sup>3</sup>                                                                                                     |
| Absorption coefficient          | 2.037 mm <sup>-1</sup>                                                                                                         |
| F(000)                          | 1034                                                                                                                           |
| Crystal size                    | 0.180 x 0.160 x 0.140 mm                                                                                                       |
| Theta range for data collection | 4.210 to 66.574 deg.                                                                                                           |



|                                   |                                             |
|-----------------------------------|---------------------------------------------|
| Limiting indices                  | -14<=h<=14, -16<=k<=16, -21<=l<=21          |
| Reflections collected / unique    | 34415 / 8609 [R(int) = 0.0774]              |
| Completeness to theta = 66.574    | 98.5 %                                      |
| Absorption correction             | Semi-empirical from equivalents             |
| Refinement method                 | Full-matrix least-squares on F <sup>2</sup> |
| Data / restraints / parameters    | 8609 / 1 / 562                              |
| Goodness-of-fit on F <sup>2</sup> | 1.038                                       |
| Final R indices [I>2sigma(I)]     | R1 = 0.1044, wR2 = 0.2880                   |
| R indices (all data)              | R1 = 0.1372, wR2 = 0.3237                   |
| Extinction coefficient            | n/a                                         |
| Largest diff. peak and hole       | 1.899 and -1.144 e.A <sup>-3</sup>          |

**Table 2-11.** Atomic coordinates (x 10<sup>4</sup>) and equivalent isotropic displacement parameters (A<sup>2</sup> x 10<sup>3</sup>) for **11**.

U(eq) is defined as one third of the trace of the orthogonalized U<sub>ij</sub> tensor.

|       | x         | y        | z        | U(eq)  |
|-------|-----------|----------|----------|--------|
| P(1)  | 7886(1)   | 1674(1)  | 1216(1)  | 43(1)  |
| F(1)  | 2824(7)   | 3054(8)  | 1558(7)  | 187(5) |
| O(1)  | 5987(4)   | 3967(3)  | 1153(2)  | 51(1)  |
| N(1)  | 4982(5)   | 5873(4)  | 958(3)   | 51(1)  |
| C(1)  | 3747(6)   | 6386(5)  | 2248(4)  | 52(1)  |
| C(5)  | 3750(8)   | 7924(6)  | 1267(5)  | 66(2)  |
| C(6)  | 4130(6)   | 6795(5)  | 1477(4)  | 56(2)  |
| C(7)  | 5660(8)   | 5973(6)  | 122(4)   | 66(2)  |
| C(52) | 11768(19) | 3276(18) | 4822(11) | 186(9) |
| C(8)  | 5162(6)   | 4933(5)  | 1389(4)  | 48(1)  |
| C(9)  | 3239(7)   | 4772(6)  | 2324(5)  | 63(2)  |
| C(10) | 5161(6)   | 4336(5)  | 2745(4)  | 47(1)  |
| C(11) | 8549(5)   | 2289(5)  | 276(4)   | 50(1)  |
| C(12) | 8401(7)   | 2196(5)  | -445(4)  | 58(2)  |
| C(13) | 8917(8)   | 2687(6)  | -1139(4) | 71(2)  |
| C(14) | 9565(8)   | 3277(7)  | -1137(5) | 80(2)  |

|       |           |          |          |        |
|-------|-----------|----------|----------|--------|
| Ni(1) | 6420(1)   | 3016(1)  | 2073(1)  | 41(1)  |
| S(1)  | 1188(2)   | 2244(2)  | 2113(2)  | 99(1)  |
| C(15) | 9706(8)   | 3386(7)  | -441(6)  | 79(2)  |
| C(16) | 9197(7)   | 2899(6)  | 278(5)   | 62(2)  |
| C(17) | 7246(6)   | 861(5)   | 955(4)   | 46(1)  |
| C(18) | 5937(6)   | 1271(5)  | 1118(4)  | 54(2)  |
| C(19) | 5409(7)   | 710(6)   | 900(5)   | 63(2)  |
| C(20) | 6190(8)   | -257(6)  | 487(5)   | 71(2)  |
| C(21) | 7503(7)   | -677(6)  | 303(5)   | 67(2)  |
| C(22) | 8026(7)   | -131(5)  | 545(4)   | 58(2)  |
| C(23) | 9309(6)   | 656(5)   | 1482(4)  | 50(1)  |
| C(24) | 9012(6)   | 124(5)   | 2318(4)  | 51(1)  |
| C(25) | 8448(6)   | 969(5)   | 2973(4)  | 48(1)  |
| C(26) | 5903(6)   | 1140(5)  | 3425(4)  | 50(1)  |
| C(27) | 4828(7)   | 1445(6)  | 3183(5)  | 64(2)  |
| C(28) | 4201(8)   | 764(8)   | 3369(5)  | 79(2)  |
| C(29) | 4636(9)   | -231(7)  | 3801(6)  | 83(2)  |
| C(30) | 5671(8)   | -531(7)  | 4038(6)  | 80(2)  |
| C(31) | 6301(8)   | 162(6)   | 3852(5)  | 68(2)  |
| C(32) | 6446(6)   | 2703(5)  | 3985(4)  | 48(1)  |
| C(33) | 5479(7)   | 2742(5)  | 4678(4)  | 58(2)  |
| C(34) | 5264(8)   | 3285(6)  | 5337(4)  | 72(2)  |
| C(35) | 6026(9)   | 3817(6)  | 5297(5)  | 77(2)  |
| C(36) | 6968(8)   | 3793(6)  | 4606(5)  | 69(2)  |
| C(37) | 7196(7)   | 3246(5)  | 3943(4)  | 54(2)  |
| C(38) | 8782(8)   | 825(7)   | 5123(5)  | 73(2)  |
| C(39) | 9771(7)   | 972(6)   | 4525(5)  | 68(2)  |
| C(40) | 10993(7)  | 148(6)   | 4399(5)  | 64(2)  |
| C(41) | -2443(10) | 5800(8)  | 1291(8)  | 97(3)  |
| C(42) | -2089(9)  | 5194(8)  | 1954(7)  | 92(3)  |
| C(43) | -2305(13) | 5752(11) | 2613(8)  | 123(4) |
| C(44) | -2946(15) | 6918(10) | 2619(8)  | 136(6) |
| C(45) | -3331(11) | 7496(9)  | 1929(9)  | 114(4) |
| C(46) | -3040(12) | 6943(9)  | 1283(9)  | 110(4) |
| C(48) | 10364(16) | 2806(14) | 6321(10) | 138(5) |
| C(47) | 1660(20)  | 3268(17) | 1687(12) | 159(6) |

|        |           |          |          |         |
|--------|-----------|----------|----------|---------|
| C(49)  | 10680(20) | 3683(18) | 6269(14) | 184(7)  |
| C(50)  | 11230(30) | 4090(30) | 5421(18) | 271(14) |
| C(51)  | 4308(6)   | 5116(5)  | 2228(4)  | 47(1)   |
| C(01J) | 11361(16) | 2487(14) | 4982(10) | 144(6)  |
| C(01M) | 10600(14) | 2314(12) | 5722(9)  | 129(4)  |
| P(2)   | 6786(1)   | 1997(1)  | 3101(1)  | 42(1)   |
| F(2)   | 905(8)    | 4234(6)  | 2156(8)  | 190(5)  |
| O(2)   | -70(7)    | 2589(6)  | 2111(6)  | 122(3)  |
| C(2)   | 2931(8)   | 7139(6)  | 2831(5)  | 72(2)   |
| O(3)   | 1803(17)  | 1377(15) | 2562(10) | 227(6)  |
| F(3)   | 1129(14)  | 3851(13) | 1090(9)  | 231(5)  |
| C(3)   | 2541(9)   | 8281(6)  | 2638(6)  | 82(3)   |
| O(4)   | 2017(18)  | 1522(16) | 1392(11) | 241(7)  |
| C(4)   | 2920(9)   | 8665(6)  | 1872(6)  | 78(2)   |

**Table 3-11.** Bond lengths [Å] and angles [deg] for **11**.

|              |            |
|--------------|------------|
| P(1)-C(17)   | 1.815(6)   |
| P(1)-C(23)   | 1.823(6)   |
| P(1)-C(11)   | 1.824(6)   |
| P(1)-Ni(1)   | 2.2358(16) |
| F(1)-C(47)   | 1.28(2)    |
| O(1)-C(8)    | 1.264(7)   |
| O(1)-Ni(1)   | 1.954(4)   |
| N(1)-C(8)    | 1.318(8)   |
| N(1)-C(6)    | 1.435(8)   |
| N(1)-C(7)    | 1.454(9)   |
| C(1)-C(2)    | 1.363(10)  |
| C(1)-C(6)    | 1.390(10)  |
| C(1)-C(51)   | 1.522(8)   |
| C(5)-C(4)    | 1.383(12)  |
| C(5)-C(6)    | 1.386(10)  |
| C(52)-C(01J) | 1.32(2)    |
| C(52)-C(50)  | 1.432(17)  |
| C(8)-C(51)   | 1.493(8)   |

|             |            |
|-------------|------------|
| C(9)-C(51)  | 1.542(9)   |
| C(10)-C(51) | 1.537(8)   |
| C(10)-Ni(1) | 1.996(5)   |
| C(11)-C(16) | 1.389(9)   |
| C(11)-C(12) | 1.399(9)   |
| C(12)-C(13) | 1.385(10)  |
| C(13)-C(14) | 1.366(13)  |
| C(14)-C(15) | 1.358(13)  |
| Ni(1)-P(2)  | 2.1256(16) |
| S(1)-O(3)   | 1.356(18)  |
| S(1)-O(2)   | 1.408(7)   |
| S(1)-O(4)   | 1.514(18)  |
| S(1)-C(47)  | 1.69(2)    |
| C(15)-C(16) | 1.407(11)  |
| C(17)-C(18) | 1.390(9)   |
| C(17)-C(22) | 1.394(9)   |
| C(18)-C(19) | 1.375(9)   |
| C(19)-C(20) | 1.372(11)  |
| C(20)-C(21) | 1.389(11)  |
| C(21)-C(22) | 1.377(9)   |
| C(23)-C(24) | 1.529(9)   |
| C(24)-C(25) | 1.534(8)   |
| C(25)-P(2)  | 1.838(6)   |
| C(26)-C(31) | 1.358(9)   |
| C(26)-C(27) | 1.399(10)  |
| C(26)-P(2)  | 1.826(6)   |
| C(27)-C(28) | 1.385(10)  |
| C(28)-C(29) | 1.383(12)  |
| C(29)-C(30) | 1.351(13)  |
| C(30)-C(31) | 1.402(11)  |
| C(32)-C(33) | 1.383(9)   |
| C(32)-C(37) | 1.399(9)   |
| C(32)-P(2)  | 1.820(6)   |
| C(33)-C(34) | 1.384(10)  |
| C(34)-C(35) | 1.402(13)  |
| C(35)-C(36) | 1.367(12)  |

|               |           |
|---------------|-----------|
| C(36)-C(37)   | 1.390(10) |
| C(38)-C(39)   | 1.385(12) |
| C(38)-C(40)#1 | 1.390(11) |
| C(39)-C(40)   | 1.372(11) |
| C(41)-C(46)   | 1.366(14) |
| C(41)-C(42)   | 1.389(15) |
| C(42)-C(43)   | 1.397(17) |
| C(43)-C(44)   | 1.394(17) |
| C(44)-C(45)   | 1.435(19) |
| C(45)-C(46)   | 1.343(17) |
| C(48)-C(01M)  | 1.240(19) |
| C(48)-C(49)   | 1.38(2)   |
| C(47)-F(3)    | 1.37(2)   |
| C(47)-F(2)    | 1.42(2)   |
| C(49)-C(50)   | 1.54(3)   |
| C(01J)-C(01M) | 1.383(19) |
| C(2)-C(3)     | 1.395(12) |
| C(3)-C(4)     | 1.370(13) |

|                  |            |
|------------------|------------|
| C(17)-P(1)-C(23) | 105.8(3)   |
| C(17)-P(1)-C(11) | 105.6(3)   |
| C(23)-P(1)-C(11) | 102.4(3)   |
| C(17)-P(1)-Ni(1) | 113.1(2)   |
| C(23)-P(1)-Ni(1) | 118.3(2)   |
| C(11)-P(1)-Ni(1) | 110.36(19) |
| C(8)-O(1)-Ni(1)  | 108.9(4)   |
| C(8)-N(1)-C(6)   | 108.5(5)   |
| C(8)-N(1)-C(7)   | 126.0(5)   |
| C(6)-N(1)-C(7)   | 125.1(5)   |
| C(2)-C(1)-C(6)   | 118.1(6)   |
| C(2)-C(1)-C(51)  | 133.6(7)   |
| C(6)-C(1)-C(51)  | 108.1(5)   |
| C(4)-C(5)-C(6)   | 116.5(8)   |
| C(5)-C(6)-C(1)   | 123.9(7)   |
| C(5)-C(6)-N(1)   | 126.7(7)   |
| C(1)-C(6)-N(1)   | 109.4(5)   |

|                    |            |
|--------------------|------------|
| C(01J)-C(52)-C(50) | 117(2)     |
| O(1)-C(8)-N(1)     | 125.7(6)   |
| O(1)-C(8)-C(51)    | 121.5(5)   |
| N(1)-C(8)-C(51)    | 112.8(5)   |
| C(51)-C(10)-Ni(1)  | 104.6(4)   |
| C(16)-C(11)-C(12)  | 118.6(6)   |
| C(16)-C(11)-P(1)   | 118.9(5)   |
| C(12)-C(11)-P(1)   | 122.5(5)   |
| C(13)-C(12)-C(11)  | 120.0(7)   |
| C(14)-C(13)-C(12)  | 121.3(8)   |
| C(15)-C(14)-C(13)  | 119.4(7)   |
| O(1)-Ni(1)-C(10)   | 87.3(2)    |
| O(1)-Ni(1)-P(2)    | 176.90(15) |
| C(10)-Ni(1)-P(2)   | 91.12(18)  |
| O(1)-Ni(1)-P(1)    | 87.50(12)  |
| C(10)-Ni(1)-P(1)   | 173.49(19) |
| P(2)-Ni(1)-P(1)    | 94.27(6)   |
| O(3)-S(1)-O(2)     | 125.0(8)   |
| O(3)-S(1)-O(4)     | 88.0(10)   |
| O(2)-S(1)-O(4)     | 104.9(8)   |
| O(3)-S(1)-C(47)    | 123.5(10)  |
| O(2)-S(1)-C(47)    | 109.4(8)   |
| O(4)-S(1)-C(47)    | 92.1(9)    |
| C(14)-C(15)-C(16)  | 121.1(8)   |
| C(11)-C(16)-C(15)  | 119.6(8)   |
| C(18)-C(17)-C(22)  | 118.2(6)   |
| C(18)-C(17)-P(1)   | 119.4(4)   |
| C(22)-C(17)-P(1)   | 122.3(5)   |
| C(19)-C(18)-C(17)  | 121.6(6)   |
| C(18)-C(19)-C(20)  | 119.5(7)   |
| C(19)-C(20)-C(21)  | 120.2(6)   |
| C(22)-C(21)-C(20)  | 120.1(6)   |
| C(21)-C(22)-C(17)  | 120.4(6)   |
| C(24)-C(23)-P(1)   | 113.2(4)   |
| C(23)-C(24)-C(25)  | 112.0(5)   |
| C(24)-C(25)-P(2)   | 115.6(4)   |

|                     |           |
|---------------------|-----------|
| C(31)-C(26)-C(27)   | 117.9(6)  |
| C(31)-C(26)-P(2)    | 122.2(5)  |
| C(27)-C(26)-P(2)    | 119.8(5)  |
| C(28)-C(27)-C(26)   | 120.9(7)  |
| C(27)-C(28)-C(29)   | 119.9(8)  |
| C(30)-C(29)-C(28)   | 119.7(7)  |
| C(29)-C(30)-C(31)   | 120.3(7)  |
| C(26)-C(31)-C(30)   | 121.4(7)  |
| C(33)-C(32)-C(37)   | 119.4(6)  |
| C(33)-C(32)-P(2)    | 123.2(5)  |
| C(37)-C(32)-P(2)    | 117.4(5)  |
| C(34)-C(33)-C(32)   | 120.9(7)  |
| C(33)-C(34)-C(35)   | 119.6(7)  |
| C(36)-C(35)-C(34)   | 119.4(7)  |
| C(35)-C(36)-C(37)   | 121.5(8)  |
| C(36)-C(37)-C(32)   | 119.2(7)  |
| C(39)-C(38)-C(40)#1 | 120.9(7)  |
| C(40)-C(39)-C(38)   | 119.9(7)  |
| C(39)-C(40)-C(38)#1 | 119.2(8)  |
| C(46)-C(41)-C(42)   | 120.7(11) |
| C(41)-C(42)-C(43)   | 120.1(10) |
| C(44)-C(43)-C(42)   | 119.5(13) |
| C(43)-C(44)-C(45)   | 117.8(12) |
| C(46)-C(45)-C(44)   | 121.5(10) |
| C(45)-C(46)-C(41)   | 120.2(12) |
| C(01M)-C(48)-C(49)  | 121.9(19) |
| F(1)-C(47)-F(3)     | 116.4(18) |
| F(1)-C(47)-F(2)     | 107.3(14) |
| F(3)-C(47)-F(2)     | 89.2(15)  |
| F(1)-C(47)-S(1)     | 118.1(15) |
| F(3)-C(47)-S(1)     | 112.0(15) |
| F(2)-C(47)-S(1)     | 109.7(13) |
| C(48)-C(49)-C(50)   | 116(2)    |
| C(49)-C(50)-C(52)   | 114(2)    |
| C(8)-C(51)-C(1)     | 100.4(5)  |
| C(8)-C(51)-C(10)    | 105.1(5)  |

|                     |            |
|---------------------|------------|
| C(1)-C(51)-C(10)    | 122.2(5)   |
| C(8)-C(51)-C(9)     | 108.9(5)   |
| C(1)-C(51)-C(9)     | 109.0(5)   |
| C(10)-C(51)-C(9)    | 110.2(5)   |
| C(52)-C(01J)-C(01M) | 123.8(15)  |
| C(48)-C(01M)-C(01J) | 122.2(17)  |
| C(32)-P(2)-C(26)    | 105.7(3)   |
| C(32)-P(2)-C(25)    | 101.4(3)   |
| C(26)-P(2)-C(25)    | 103.6(3)   |
| C(32)-P(2)-Ni(1)    | 117.32(19) |
| C(26)-P(2)-Ni(1)    | 111.8(2)   |
| C(25)-P(2)-Ni(1)    | 115.4(2)   |
| C(1)-C(2)-C(3)      | 119.3(8)   |
| C(4)-C(3)-C(2)      | 121.6(7)   |
| C(3)-C(4)-C(5)      | 120.6(7)   |

Symmetry transformations used to generate equivalent atoms:

#1 -x+2,-y,-z+1

**Table 4-11.** Anisotropic displacement parameters ( $\text{\AA}^2 \times 10^3$ ) for **11**.

The anisotropic displacement factor exponent takes the form:

$$-2 \pi^2 [ h^2 a^{*2} U_{11} + \dots + 2 h k a^* b^* U_{12} ]$$

|      | U11   | U22    | U33     | U23    | U13    | U12    |
|------|-------|--------|---------|--------|--------|--------|
| P(1) | 38(1) | 42(1)  | 44(1)   | -4(1)  | -13(1) | -12(1) |
| F(1) | 84(5) | 168(7) | 328(13) | -85(8) | -14(6) | -76(5) |
| O(1) | 54(2) | 42(2)  | 44(2)   | -1(2)  | -22(2) | -7(2)  |
| N(1) | 57(3) | 46(3)  | 49(3)   | 2(2)   | -22(2) | -17(2) |
| C(1) | 53(4) | 46(3)  | 58(4)   | -7(3)  | -31(3) | -10(3) |
| C(5) | 74(5) | 51(3)  | 81(5)   | 3(3)   | -41(4) | -23(3) |
| C(6) | 55(4) | 48(3)  | 68(4)   | -6(3)  | -32(3) | -12(3) |
| C(7) | 75(5) | 66(4)  | 54(4)   | 8(3)   | -24(3) | -26(4) |



|       |         |         |         |         |        |          |
|-------|---------|---------|---------|---------|--------|----------|
| C(52) | 176(17) | 205(19) | 159(15) | -69(14) | 46(13) | -113(16) |
| C(8)  | 48(3)   | 52(3)   | 46(3)   | -4(2)   | -20(3) | -18(3)   |
| C(9)  | 52(4)   | 62(4)   | 74(4)   | 3(3)    | -27(3) | -20(3)   |
| C(10) | 46(3)   | 42(3)   | 50(3)   | -8(2)   | -21(3) | -10(2)   |
| C(11) | 35(3)   | 44(3)   | 57(4)   | -5(3)   | -11(3) | -7(2)    |
| C(12) | 53(4)   | 50(3)   | 54(4)   | 0(3)    | -15(3) | -9(3)    |
| C(13) | 68(5)   | 65(4)   | 53(4)   | 6(3)    | -10(3) | -14(4)   |
| C(14) | 70(5)   | 63(4)   | 68(5)   | 13(4)   | 0(4)   | -18(4)   |
| Ni(1) | 39(1)   | 39(1)   | 43(1)   | -2(1)   | -15(1) | -12(1)   |
| S(1)  | 72(1)   | 62(1)   | 171(3)  | 27(1)   | -60(2) | -31(1)   |
| C(15) | 58(4)   | 60(4)   | 101(7)  | 11(4)   | -7(4)  | -27(4)   |
| C(16) | 51(4)   | 57(4)   | 76(5)   | -2(3)   | -17(3) | -24(3)   |
| C(17) | 44(3)   | 42(3)   | 50(3)   | 0(2)    | -18(3) | -13(2)   |
| C(18) | 47(3)   | 50(3)   | 63(4)   | -7(3)   | -16(3) | -17(3)   |
| C(19) | 53(4)   | 62(4)   | 83(5)   | -3(3)   | -29(4) | -24(3)   |
| C(20) | 73(5)   | 56(4)   | 100(6)  | -6(4)   | -48(4) | -25(4)   |
| C(21) | 69(5)   | 52(3)   | 84(5)   | -16(3)  | -34(4) | -17(3)   |
| C(22) | 48(3)   | 52(3)   | 70(4)   | -10(3)  | -22(3) | -13(3)   |
| C(23) | 41(3)   | 53(3)   | 56(3)   | -6(3)   | -17(3) | -14(3)   |
| C(24) | 44(3)   | 44(3)   | 60(4)   | -1(3)   | -23(3) | -9(2)    |
| C(25) | 46(3)   | 47(3)   | 47(3)   | 2(2)    | -18(3) | -16(3)   |
| C(26) | 47(3)   | 47(3)   | 54(3)   | -4(3)   | -15(3) | -19(3)   |
| C(27) | 64(4)   | 62(4)   | 72(4)   | 9(3)    | -23(4) | -32(3)   |
| C(28) | 72(5)   | 97(6)   | 94(6)   | 15(5)   | -36(5) | -56(5)   |
| C(29) | 81(6)   | 75(5)   | 105(7)  | 5(5)    | -24(5) | -50(5)   |
| C(30) | 75(5)   | 55(4)   | 110(7)  | 20(4)   | -29(5) | -34(4)   |
| C(31) | 62(4)   | 60(4)   | 82(5)   | 12(4)   | -28(4) | -25(3)   |
| C(32) | 52(3)   | 41(3)   | 47(3)   | 1(2)    | -22(3) | -13(2)   |
| C(33) | 66(4)   | 49(3)   | 47(3)   | -1(3)   | -14(3) | -18(3)   |
| C(34) | 80(5)   | 58(4)   | 49(4)   | 0(3)    | -14(3) | -12(4)   |
| C(35) | 100(6)  | 55(4)   | 63(5)   | -6(3)   | -44(5) | -9(4)    |
| C(36) | 86(5)   | 56(4)   | 79(5)   | -5(3)   | -50(5) | -22(4)   |
| C(37) | 60(4)   | 48(3)   | 59(4)   | 1(3)    | -31(3) | -19(3)   |
| C(38) | 56(4)   | 65(4)   | 86(5)   | -9(4)   | -31(4) | -6(3)    |
| C(39) | 60(4)   | 63(4)   | 77(5)   | 8(3)    | -32(4) | -20(3)   |
| C(40) | 59(4)   | 66(4)   | 66(4)   | -6(3)   | -23(3) | -22(3)   |

|        |         |         |         |         |        |         |
|--------|---------|---------|---------|---------|--------|---------|
| C(41)  | 92(7)   | 67(5)   | 154(10) | 0(6)    | -62(7) | -37(5)  |
| C(42)  | 76(6)   | 65(5)   | 120(8)  | -4(5)   | -14(5) | -29(4)  |
| C(43)  | 135(11) | 105(8)  | 97(8)   | 23(7)   | -7(7)  | -56(8)  |
| C(44)  | 167(13) | 89(7)   | 103(8)  | -23(7)  | 36(8)  | -61(8)  |
| C(45)  | 90(7)   | 66(5)   | 150(11) | 6(7)    | -12(7) | -24(5)  |
| C(46)  | 110(8)  | 84(7)   | 161(11) | 11(7)   | -68(8) | -48(6)  |
| C(51)  | 41(3)   | 44(3)   | 52(3)   | -9(2)   | -18(3) | -9(2)   |
| C(01J) | 146(13) | 142(12) | 142(12) | -48(10) | 4(10)  | -79(11) |
| C(01M) | 114(10) | 115(9)  | 131(11) | -24(8)  | -23(8) | -29(8)  |
| P(2)   | 41(1)   | 41(1)   | 44(1)   | 0(1)    | -15(1) | -16(1)  |
| F(2)   | 122(6)  | 87(4)   | 382(16) | -53(7)  | -81(8) | -41(4)  |
| O(2)   | 77(4)   | 88(4)   | 221(9)  | 4(5)    | -57(5) | -46(4)  |
| C(2)   | 72(5)   | 64(4)   | 72(5)   | -14(3)  | -36(4) | -8(4)   |
| C(3)   | 83(6)   | 57(4)   | 93(6)   | -25(4)  | -47(5) | 4(4)    |
| C(4)   | 86(6)   | 46(3)   | 105(7)  | -10(4)  | -56(5) | -9(4)   |

**Table 5-11.** Hydrogen coordinates ( $\times 10^4$ ) and isotropic displacement parameters ( $\text{\AA}^2 \times 10^3$ ) for **11**.

|        | x     | y    | z     | U(eq) |
|--------|-------|------|-------|-------|
| H(5)   | 4044  | 8175 | 735   | 79    |
| H(7A)  | 6312  | 5232 | -70   | 100   |
| H(7B)  | 6066  | 6471 | 64    | 100   |
| H(7C)  | 5058  | 6285 | -192  | 100   |
| H(52)  | 12388 | 3305 | 4334  | 223   |
| H(9A)  | 3612  | 3974 | 2221  | 94    |
| H(9B)  | 2766  | 5212 | 1944  | 94    |
| H(9C)  | 2658  | 4911 | 2869  | 94    |
| H(10A) | 4654  | 4107 | 3248  | 56    |
| H(10B) | 5596  | 4710 | 2875  | 56    |
| H(12)  | 7946  | 1795 | -458  | 69    |
| H(13)  | 8818  | 2613 | -1627 | 85    |

|        |       |       |       |     |
|--------|-------|-------|-------|-----|
| H(14)  | 9914  | 3609  | -1619 | 96  |
| H(15)  | 10155 | 3797  | -439  | 95  |
| H(16)  | 9296  | 2987  | 762   | 74  |
| H(18)  | 5393  | 1955  | 1386  | 65  |
| H(19)  | 4510  | 991   | 1034  | 76  |
| H(20)  | 5831  | -642  | 327   | 85  |
| H(21)  | 8042  | -1341 | 10    | 80  |
| H(22)  | 8924  | -433  | 431   | 69  |
| H(23A) | 9802  | 58    | 1088  | 61  |
| H(23B) | 9848  | 1031  | 1452  | 61  |
| H(24A) | 9804  | -505  | 2392  | 62  |
| H(24B) | 8401  | -183  | 2369  | 62  |
| H(25A) | 8980  | 1381  | 2852  | 57  |
| H(25B) | 8506  | 549   | 3486  | 57  |
| H(27)  | 4524  | 2129  | 2888  | 77  |
| H(28)  | 3473  | 980   | 3201  | 95  |
| H(29)  | 4208  | -700  | 3930  | 99  |
| H(30)  | 5974  | -1216 | 4332  | 96  |
| H(31)  | 7022  | -56   | 4028  | 82  |
| H(33)  | 4954  | 2391  | 4703  | 69  |
| H(34)  | 4604  | 3298  | 5812  | 86  |
| H(35)  | 5889  | 4190  | 5745  | 92  |
| H(36)  | 7479  | 4159  | 4579  | 83  |
| H(37)  | 7852  | 3240  | 3467  | 65  |
| H(38)  | 7938  | 1397  | 5206  | 88  |
| H(39)  | 9604  | 1642  | 4204  | 81  |
| H(40)  | 11676 | 242   | 3989  | 77  |
| H(41)  | -2269 | 5415  | 839   | 116 |
| H(42)  | -1698 | 4398  | 1960  | 110 |
| H(43)  | -2018 | 5341  | 3054  | 147 |
| H(44)  | -3122 | 7316  | 3065  | 163 |
| H(45)  | -3802 | 8287  | 1929  | 137 |
| H(46)  | -3250 | 7349  | 819   | 132 |
| H(48)  | 9955  | 2572  | 6830  | 165 |
| H(49)  | 10558 | 4020  | 6730  | 221 |
| H(50)  | 11213 | 4810  | 5304  | 325 |

|        |       |      |      |     |
|--------|-------|------|------|-----|
| H(01J) | 11605 | 2010 | 4566 | 173 |
| H(01M) | 10246 | 1802 | 5773 | 154 |
| H(2)   | 2631  | 6890 | 3362 | 86  |
| H(3)   | 1999  | 8805 | 3049 | 99  |
| H(4)   | 2610  | 9449 | 1755 | 94  |

**Table 6-11.** Torsion angles [deg] for **11**.

|                         |           |
|-------------------------|-----------|
| C(4)-C(5)-C(6)-C(1)     | -1.4(11)  |
| C(4)-C(5)-C(6)-N(1)     | -179.8(7) |
| C(2)-C(1)-C(6)-C(5)     | 1.3(10)   |
| C(51)-C(1)-C(6)-C(5)    | 177.2(6)  |
| C(2)-C(1)-C(6)-N(1)     | 180.0(6)  |
| C(51)-C(1)-C(6)-N(1)    | -4.2(7)   |
| C(8)-N(1)-C(6)-C(5)     | 176.5(7)  |
| C(7)-N(1)-C(6)-C(5)     | 4.0(11)   |
| C(8)-N(1)-C(6)-C(1)     | -2.2(7)   |
| C(7)-N(1)-C(6)-C(1)     | -174.6(6) |
| Ni(1)-O(1)-C(8)-N(1)    | 153.3(5)  |
| Ni(1)-O(1)-C(8)-C(51)   | -23.9(7)  |
| C(6)-N(1)-C(8)-O(1)     | -169.5(6) |
| C(7)-N(1)-C(8)-O(1)     | 2.8(10)   |
| C(6)-N(1)-C(8)-C(51)    | 7.9(7)    |
| C(7)-N(1)-C(8)-C(51)    | -179.8(6) |
| C(17)-P(1)-C(11)-C(16)  | -175.3(5) |
| C(23)-P(1)-C(11)-C(16)  | -64.7(5)  |
| Ni(1)-P(1)-C(11)-C(16)  | 62.1(5)   |
| C(17)-P(1)-C(11)-C(12)  | 6.4(6)    |
| C(23)-P(1)-C(11)-C(12)  | 117.0(5)  |
| Ni(1)-P(1)-C(11)-C(12)  | -116.2(5) |
| C(16)-C(11)-C(12)-C(13) | 1.3(9)    |
| P(1)-C(11)-C(12)-C(13)  | 179.5(5)  |
| C(11)-C(12)-C(13)-C(14) | -0.6(11)  |
| C(12)-C(13)-C(14)-C(15) | -0.1(12)  |
| C(13)-C(14)-C(15)-C(16) | 0.1(12)   |

|                         |           |
|-------------------------|-----------|
| C(12)-C(11)-C(16)-C(15) | -1.2(9)   |
| P(1)-C(11)-C(16)-C(15)  | -179.5(5) |
| C(14)-C(15)-C(16)-C(11) | 0.5(11)   |
| C(23)-P(1)-C(17)-C(18)  | 147.0(5)  |
| C(11)-P(1)-C(17)-C(18)  | -104.8(5) |
| Ni(1)-P(1)-C(17)-C(18)  | 16.0(6)   |
| C(23)-P(1)-C(17)-C(22)  | -37.4(6)  |
| C(11)-P(1)-C(17)-C(22)  | 70.7(6)   |
| Ni(1)-P(1)-C(17)-C(22)  | -168.5(5) |
| C(22)-C(17)-C(18)-C(19) | 1.4(10)   |
| P(1)-C(17)-C(18)-C(19)  | 177.1(6)  |
| C(17)-C(18)-C(19)-C(20) | -2.3(11)  |
| C(18)-C(19)-C(20)-C(21) | 1.1(12)   |
| C(19)-C(20)-C(21)-C(22) | 1.0(12)   |
| C(20)-C(21)-C(22)-C(17) | -1.9(12)  |
| C(18)-C(17)-C(22)-C(21) | 0.7(10)   |
| P(1)-C(17)-C(22)-C(21)  | -174.9(6) |
| C(17)-P(1)-C(23)-C(24)  | -77.6(5)  |
| C(11)-P(1)-C(23)-C(24)  | 172.0(4)  |
| Ni(1)-P(1)-C(23)-C(24)  | 50.5(5)   |
| P(1)-C(23)-C(24)-C(25)  | -68.3(6)  |
| C(23)-C(24)-C(25)-P(2)  | 74.2(6)   |
| C(31)-C(26)-C(27)-C(28) | -0.6(11)  |
| P(2)-C(26)-C(27)-C(28)  | 175.0(6)  |
| C(26)-C(27)-C(28)-C(29) | 0.2(13)   |
| C(27)-C(28)-C(29)-C(30) | 0.0(15)   |
| C(28)-C(29)-C(30)-C(31) | 0.3(15)   |
| C(27)-C(26)-C(31)-C(30) | 0.9(11)   |
| P(2)-C(26)-C(31)-C(30)  | -174.6(7) |
| C(29)-C(30)-C(31)-C(26) | -0.7(14)  |
| C(37)-C(32)-C(33)-C(34) | -1.6(10)  |
| P(2)-C(32)-C(33)-C(34)  | 179.6(5)  |
| C(32)-C(33)-C(34)-C(35) | 0.9(10)   |
| C(33)-C(34)-C(35)-C(36) | 0.2(11)   |
| C(34)-C(35)-C(36)-C(37) | -0.5(11)  |
| C(35)-C(36)-C(37)-C(32) | -0.3(10)  |

|                           |            |
|---------------------------|------------|
| C(33)-C(32)-C(37)-C(36)   | 1.3(9)     |
| P(2)-C(32)-C(37)-C(36)    | -179.9(5)  |
| C(40)#1-C(38)-C(39)-C(40) | 0.2(13)    |
| C(38)-C(39)-C(40)-C(38)#1 | -0.2(13)   |
| C(46)-C(41)-C(42)-C(43)   | -2.0(16)   |
| C(41)-C(42)-C(43)-C(44)   | 3.8(18)    |
| C(42)-C(43)-C(44)-C(45)   | -1(2)      |
| C(43)-C(44)-C(45)-C(46)   | -3(2)      |
| C(44)-C(45)-C(46)-C(41)   | 4.6(19)    |
| C(42)-C(41)-C(46)-C(45)   | -2.3(18)   |
| O(3)-S(1)-C(47)-F(1)      | 23(2)      |
| O(2)-S(1)-C(47)-F(1)      | -172.6(14) |
| O(4)-S(1)-C(47)-F(1)      | -65.9(17)  |
| O(3)-S(1)-C(47)-F(3)      | 162.4(14)  |
| O(2)-S(1)-C(47)-F(3)      | -33.2(17)  |
| O(4)-S(1)-C(47)-F(3)      | 73.5(16)   |
| O(3)-S(1)-C(47)-F(2)      | -100.2(16) |
| O(2)-S(1)-C(47)-F(2)      | 64.2(15)   |
| O(4)-S(1)-C(47)-F(2)      | 170.8(14)  |
| C(01M)-C(48)-C(49)-C(50)  | 5(3)       |
| C(48)-C(49)-C(50)-C(52)   | -21(4)     |
| C(01J)-C(52)-C(50)-C(49)  | 23(4)      |
| O(1)-C(8)-C(51)-C(1)      | 167.7(5)   |
| N(1)-C(8)-C(51)-C(1)      | -9.8(7)    |
| O(1)-C(8)-C(51)-C(10)     | 40.1(7)    |
| N(1)-C(8)-C(51)-C(10)     | -137.4(5)  |
| O(1)-C(8)-C(51)-C(9)      | -77.9(7)   |
| N(1)-C(8)-C(51)-C(9)      | 104.6(6)   |
| C(2)-C(1)-C(51)-C(8)      | -177.0(7)  |
| C(6)-C(1)-C(51)-C(8)      | 8.0(6)     |
| C(2)-C(1)-C(51)-C(10)     | -61.7(10)  |
| C(6)-C(1)-C(51)-C(10)     | 123.3(6)   |
| C(2)-C(1)-C(51)-C(9)      | 68.7(9)    |
| C(6)-C(1)-C(51)-C(9)      | -106.3(6)  |
| Ni(1)-C(10)-C(51)-C(8)    | -32.5(5)   |
| Ni(1)-C(10)-C(51)-C(1)    | -145.5(5)  |

|                           |           |
|---------------------------|-----------|
| Ni(1)-C(10)-C(51)-C(9)    | 84.7(5)   |
| C(50)-C(52)-C(01J)-C(01M) | -9(4)     |
| C(49)-C(48)-C(01M)-C(01J) | 10(3)     |
| C(52)-C(01J)-C(01M)-C(48) | -9(3)     |
| C(33)-C(32)-P(2)-C(26)    | -13.4(6)  |
| C(37)-C(32)-P(2)-C(26)    | 167.9(5)  |
| C(33)-C(32)-P(2)-C(25)    | -121.2(5) |
| C(37)-C(32)-P(2)-C(25)    | 60.0(5)   |
| C(33)-C(32)-P(2)-Ni(1)    | 112.1(5)  |
| C(37)-C(32)-P(2)-Ni(1)    | -66.7(5)  |
| C(31)-C(26)-P(2)-C(32)    | -76.2(6)  |
| C(27)-C(26)-P(2)-C(32)    | 108.4(6)  |
| C(31)-C(26)-P(2)-C(25)    | 30.1(7)   |
| C(27)-C(26)-P(2)-C(25)    | -145.3(5) |
| C(31)-C(26)-P(2)-Ni(1)    | 155.0(6)  |
| C(27)-C(26)-P(2)-Ni(1)    | -20.4(6)  |
| C(24)-C(25)-P(2)-C(32)    | 173.6(5)  |
| C(24)-C(25)-P(2)-C(26)    | 64.1(5)   |
| C(24)-C(25)-P(2)-Ni(1)    | -58.5(5)  |
| C(6)-C(1)-C(2)-C(3)       | -1.7(11)  |
| C(51)-C(1)-C(2)-C(3)      | -176.3(7) |
| C(1)-C(2)-C(3)-C(4)       | 2.5(13)   |
| C(2)-C(3)-C(4)-C(5)       | -2.7(13)  |
| C(6)-C(5)-C(4)-C(3)       | 2.0(11)   |

Symmetry transformations used to generate equivalent atoms:

#1 -x+2,-y,-z+1

**Table 7-11.** Hydrogen bonds for **11** [A and deg.].

---

| D-H...A | d(D-H) | d(H...A) | d(D...A) | <(DHA) |
|---------|--------|----------|----------|--------|
|---------|--------|----------|----------|--------|
